# Supplementary material for: Determining E-Bike Drivers’ Decision-Making Mechanisms during Signal Change Interval Using the Hidden Markov Driving Model
Source: Hindawi journal article supplement (doi:10.1155/2019/7341097), 2019-04-07
Supplement: f1 [file 7341097.f1.zip]

Archive with 4 entries (3 files):
- 7341097.f1/
- 7341097.f1/Supplementary Material 1_e-bike trajectories_stop samples.xls
- 7341097.f1/Supplementary Material 2_e-bike trajectories_pass samples.xls
- 7341097.f1/Supplementary Material 3_five decision types.xls
