# Supplementary material for: Determining E-Bike Drivers’ Decision-Making Mechanisms during Signal Change Interval Using the Hidden Markov Driving Model
Source: Hindawi journal article supplement (doi:10.1155/2019/7341097), 2019-04-07
Supplement: f1 [file 7341097.f1.zip › 7341097.f1/Supplementary Material 1_e-bike trajectories_stop samples.xls]

## Sheet: stop samples
1	1899-12-31 23:48:02	GlobalTime	X[m]	Y[m]	Vx[m/s]	Vy[m/s]	Ax[m/s2]	Ay[m/s2]	Speed [km/h]	Acceleration [m/s2]	Space[m]	Distance to stop-line		Time difference			Acceleration difference		Decision time			Flashing Green		Yellow light
		1899-12-31 23:47:54	2.83	-35.7	-0.01	7.46	-0.06	0.02	26.87	0.06	0	36.63	43.82	-7.92	-4.92
		1899-12-31 23:47:54	2.82	-34.95	-0.01	7.47	-0.07	0.03	26.88	0.08	0.75	35.88	43.47	-7.82	-4.82		0.0276492
		1899-12-31 23:47:54	2.82	-34.21	-0.02	7.47	-0.09	0.04	26.89	0.1	1.49	35.14	43.12	-7.72	-4.72		0.0280332
		1899-12-31 23:47:54	2.82	-33.46	-0.03	7.47	-0.11	0.04	26.91	0.12	2.24	34.39	42.77	-7.62	-4.62		0.0553498
		1899-12-31 23:47:54	2.82	-32.71	-0.04	7.48	-0.12	0.05	26.93	0.13	2.99	33.64	42.43	-7.52	-4.52		0.0553909
		1899-12-31 23:47:54	2.81	-31.96	-0.05	7.48	-0.14	0.05	26.94	0.15	3.74	32.89	42.07	-7.42	-4.42		0.0277109
		1899-12-31 23:47:54	2.81	-31.22	-0.07	7.49	-0.15	0.05	26.96	0.16	4.49	32.14	41.72	-7.32	-4.32		0.0554527
		1899-12-31 23:47:54	2.8	-30.47	-0.08	7.49	-0.17	0.05	26.98	0.18	5.23	31.4	41.37	-7.22	-4.22		0.0562437
		1899-12-31 23:47:54	2.79	-29.72	-0.1	7.5	-0.18	0.04	27	0.19	5.98	30.65	41.02	-7.12	-4.12		0.055535
		1899-12-31 23:47:54	2.78	-28.97	-0.12	7.5	-0.2	0.04	27.02	0.2	6.73	29.9	40.66	-7.02	-4.02		0.0555761
		1899-12-31 23:47:55	2.76	-28.22	-0.14	7.51	-0.21	0.03	27.03	0.21	7.49	29.14	40.31	-6.92	-3.92		0.0274377
		1899-12-31 23:47:55	2.75	-27.47	-0.16	7.51	-0.22	0.01	27.04	0.22	8.24	28.39	39.95	-6.82	-3.82		0.0278138
		1899-12-31 23:47:55	2.73	-26.71	-0.18	7.51	-0.23	-0.01	27.04	0.23	8.99	27.64	39.59	-6.72	-3.72		0
		1899-12-31 23:47:55	2.71	-25.96	-0.21	7.51	-0.23	-0.03	27.04	0.23	9.74	26.89	39.23	-6.62	-3.62		0
		1899-12-31 23:47:55	2.69	-25.21	-0.23	7.5	-0.23	-0.05	27.03	0.24	10.49	26.14	38.87	-6.52	-3.52		-0.0278138
		1899-12-31 23:47:55	2.67	-24.46	-0.25	7.5	-0.23	-0.09	27.01	0.25	11.24	25.39	38.5	-6.42	-3.42		-0.0555967
		1899-12-31 23:47:55	2.64	-23.71	-0.28	7.49	-0.23	-0.12	26.98	0.26	11.99	24.64	38.13	-6.32	-3.32		-0.0833179
		1899-12-31 23:47:55	2.61	-22.97	-0.3	7.48	-0.23	-0.16	26.93	0.28	12.74	23.89	37.76	-6.22	-3.22		-0.138657
		1899-12-31 23:47:55	2.58	-22.22	-0.32	7.46	-0.22	-0.21	26.87	0.3	13.49	23.14	37.39	-6.12	-3.12		-0.166049
		1899-12-31 23:47:55	2.55	-21.47	-0.34	7.43	-0.21	-0.26	26.79	0.33	14.23	22.4	37.01	-6.02	-3.02		-0.223807
		1899-12-31 23:47:56	2.51	-20.73	-0.36	7.41	-0.2	-0.32	26.7	0.37	14.97	21.66	36.63	-5.92	-2.92		-0.250985
		1899-12-31 23:47:56	2.47	-19.99	-0.38	7.37	-0.18	-0.38	26.58	0.42	15.71	20.92	36.24	-5.82	-2.82		-0.333333
		1899-12-31 23:47:56	2.43	-19.26	-0.4	7.33	-0.16	-0.44	26.44	0.47	16.45	20.18	35.85	-5.72	-2.72		-0.386991
		1899-12-31 23:47:56	2.39	-18.53	-0.42	7.29	-0.14	-0.5	26.28	0.52	17.18	19.45	35.45	-5.62	-2.62		-0.445797		26.28	19.45	-3
		1899-12-31 23:47:56	2.35	-17.8	-0.43	7.24	-0.12	-0.57	26.09	0.58	17.91	18.72	35.04	-5.52	-2.52		-0.52587
		1899-12-31 23:47:56	2.31	-17.08	-0.44	7.18	-0.09	-0.64	25.88	0.64	18.63	18	34.63	-5.42	-2.42		-0.584796
		1899-12-31 23:47:56	2.26	-16.37	-0.45	7.11	-0.06	-0.71	25.65	0.71	19.35	17.28	34.21	-5.32	-2.32		-0.635068
		1899-12-31 23:47:56	2.22	-15.66	-0.45	7.04	-0.03	-0.77	25.39	0.77	20.06	16.57	33.78	-5.22	-2.22		-0.721092
		1899-12-31 23:47:56	2.17	-14.96	-0.46	6.96	0	-0.84	25.1	0.84	20.76	15.87	33.34	-5.12	-2.12		-0.806994
		1899-12-31 23:47:56	2.13	-14.27	-0.45	6.87	0.04	-0.9	24.79	0.9	21.45	15.18	32.9	-5.02	-2.02		-0.864751
		1899-12-31 23:47:57	2.08	-13.58	-0.45	6.78	0.07	-0.97	24.46	0.97	22.13	14.5	32.44	-4.92	-1.92		-0.922096
		1899-12-31 23:47:57	2.04	-12.91	-0.44	6.68	0.11	-1.02	24.1	1.03	22.81	13.82	31.97	-4.82	-1.82		-0.99183
		1899-12-31 23:47:57	1.99	-12.25	-0.43	6.58	0.14	-1.08	23.72	1.09	23.47	13.16	31.49	-4.72	-1.72		-1.06222
		1899-12-31 23:47:57	1.95	-11.6	-0.41	6.47	0.18	-1.13	23.33	1.14	24.13	12.5	31	-4.62	-1.62		-1.07262
		1899-12-31 23:47:57	1.91	-10.96	-0.4	6.35	0.21	-1.17	22.91	1.19	24.77	11.86	30.5	-4.52	-1.52		-1.17072
		1899-12-31 23:47:57	1.87	-10.33	-0.37	6.23	0.25	-1.21	22.48	1.24	25.4	11.23	29.99	-4.42	-1.42		-1.19523
		1899-12-31 23:47:57	1.84	-9.71	-0.35	6.11	0.28	-1.24	22.03	1.28	26.02	10.61	29.46	-4.32	-1.32		-1.24636
		1899-12-31 23:47:57	1.8	-9.1	-0.32	5.99	0.31	-1.27	21.58	1.31	26.62	10.01	28.92	-4.22	-1.22		-1.26186
		1899-12-31 23:47:57	1.77	-8.51	-0.29	5.86	0.34	-1.29	21.11	1.33	27.22	9.41	28.36	-4.12	-1.12		-1.29014
		1899-12-31 23:47:57	1.75	-7.93	-0.25	5.73	0.37	-1.29	20.64	1.35	27.8	8.83	27.8	-4.02	-1.02		-1.30524
		1899-12-31 23:47:58	1.72	-7.37	-0.21	5.6	0.39	-1.3	20.17	1.35	28.36	8.27	27.22	-3.92	-0.92		-1.32142
		1899-12-31 23:47:58	1.7	-6.81	-0.17	5.47	0.41	-1.29	19.7	1.36	28.92	7.71	26.62	-3.82	-0.82		-1.29098
		1899-12-31 23:47:58	1.69	-6.27	-0.13	5.34	0.43	-1.28	19.23	1.35	29.46	7.17	26.02	-3.72	-0.72		-1.30723
		1899-12-31 23:47:58	1.68	-5.74	-0.09	5.21	0.45	-1.26	18.77	1.34	29.99	6.64	25.4	-3.62	-0.62		-1.27242
		1899-12-31 23:47:58	1.67	-5.23	-0.04	5.09	0.46	-1.23	18.32	1.32	30.5	6.13	24.77	-3.52	-0.52		-1.2626
		1899-12-31 23:47:58	1.67	-4.73	0	4.97	0.47	-1.2	17.88	1.29	31	5.63	24.13	-3.42	-0.42		-1.22901
		1899-12-31 23:47:58	1.67	-4.24	0.05	4.85	0.47	-1.17	17.45	1.26	31.49	5.14	23.47	-3.32	-0.32		-1.19614
		1899-12-31 23:47:58	1.68	-3.76	0.1	4.73	0.47	-1.13	17.04	1.22	31.97	4.66	22.81	-3.22	-0.22		-1.13658
		1899-12-31 23:47:58	1.69	-3.29	0.14	4.62	0.47	-1.08	16.64	1.18	32.44	4.19	22.13	-3.12	-0.12		-1.10586
		1899-12-31 23:47:58	1.71	-2.83	0.19	4.51	0.46	-1.03	16.27	1.13	32.9	3.73	21.45	-3.02	-0.02		-1.02126					16.27	3.73
		1899-12-31 23:47:59	1.73	-2.39	0.24	4.41	0.45	-0.98	15.91	1.07	33.34	3.29	20.76	-2.92	0.08		-1.01578
		1899-12-31 23:47:59	1.75	-1.95	0.28	4.32	0.43	-0.92	15.58	1.01	33.78	2.85	20.06	-2.82	0.18		-0.911169
		1899-12-31 23:47:59	1.79	-1.52	0.32	4.23	0.41	-0.86	15.26	0.95	34.21	2.42	19.35	-2.72	0.28		-0.885444
		1899-12-31 23:47:59	1.82	-1.1	0.36	4.14	0.39	-0.8	14.97	0.89	34.63	2	18.63	-2.62	0.38		-0.805289
		1899-12-31 23:47:59	1.86	-0.69	0.4	4.07	0.36	-0.74	14.71	0.82	35.04	1.59	17.91	-2.52	0.48		-0.726137
		1899-12-31 23:47:59	1.9	-0.29	0.44	3.99	0.33	-0.68	14.46	0.76	35.45	1.18	17.18	-2.42	0.58		-0.686211
		1899-12-31 23:47:59	1.94	0.1	0.47	3.93	0.3	-0.62	14.24	0.69	35.85	0.78	16.45	-2.32	0.68		-0.608989
		1899-12-31 23:47:59	1.99	0.49	0.5	3.87	0.27	-0.57	14.03	0.63	36.24	0.39	15.71	-2.22	0.78		-0.58728
		1899-12-31 23:47:59	2.04	0.88	0.52	3.81	0.24	-0.51	13.85	0.56	36.63	0	14.97	-2.12	0.88		-0.496439
		1899-12-31 23:47:59	2.1	1.26	0.55	3.76	0.21	-0.46	13.69	0.5	37.01	-0.38	14.23	-2.02	0.98		-0.447368
		1899-12-31 23:48:00	2.15	1.63	0.57	3.72	0.18	-0.41	13.54	0.44	37.39	-0.76	13.49	-1.92	1.08		-0.414687
		1899-12-31 23:48:00	2.21	2	0.58	3.68	0.15	-0.36	13.41	0.39	37.76	-1.13	12.74	-1.82	1.18		-0.365313
		1899-12-31 23:48:00	2.27	2.37	0.6	3.65	0.12	-0.32	13.3	0.34	38.13	-1.5	11.99	-1.72	1.28		-0.306358
		1899-12-31 23:48:00	2.33	2.73	0.61	3.61	0.09	-0.28	13.2	0.29	38.5	-1.87	11.24	-1.62	1.38		-0.276318
		1899-12-31 23:48:00	2.39	3.09	0.62	3.59	0.06	-0.24	13.11	0.25	38.87	-2.24	10.49	-1.52	1.48		-0.246903
		1899-12-31 23:48:00	2.45	3.45	0.62	3.57	0.04	-0.21	13.03	0.21	39.23	-2.6	9.74	-1.42	1.58		-0.224108
		1899-12-31 23:48:00	2.52	3.8	0.63	3.55	0.02	-0.18	12.96	0.18	39.59	-2.96	8.99	-1.32	1.68		-0.19497
		1899-12-31 23:48:00	2.58	4.16	0.63	3.53	0	-0.16	12.9	0.16	39.95	-3.32	8.24	-1.22	1.78		-0.166281
		1899-12-31 23:48:00	2.64	4.51	0.63	3.51	-0.02	-0.14	12.85	0.14	40.31	-3.68	7.49	-1.12	1.88		-0.137978
		1899-12-31 23:48:00	2.7	4.86	0.62	3.5	-0.03	-0.12	12.8	0.13	40.66	-4.03	6.73	-1.02	1.98		-0.141369
		1899-12-31 23:48:01	2.77	5.21	0.62	3.49	-0.04	-0.11	12.75	0.12	41.02	-4.39	5.98	-0.92	2.08		-0.136906
		1899-12-31 23:48:01	2.83	5.56	0.62	3.48	-0.05	-0.1	12.71	0.12	41.37	-4.74	5.23	-0.82	2.18		-0.112257
		1899-12-31 23:48:01	2.89	5.9	0.61	3.47	-0.06	-0.1	12.67	0.11	41.72	-5.09	4.49	-0.72	2.28		-0.111905
		1899-12-31 23:48:01	2.95	6.25	0.6	3.46	-0.06	-0.09	12.63	0.11	42.07	-5.44	3.74	-0.62	2.38		-0.111552
		1899-12-31 23:48:01	3.01	6.6	0.6	3.45	-0.07	-0.09	12.6	0.11	42.43	-5.8	2.99	-0.52	2.48		-0.081115
		1899-12-31 23:48:01	3.07	6.94	0.59	3.44	-0.07	-0.09	12.56	0.11	42.77	-6.14	2.24	-0.42	2.58		-0.114198
		1899-12-31 23:48:01	3.13	7.28	0.58	3.43	-0.07	-0.09	12.53	0.11	43.12		1.49	-0.32	2.68		-0.0829696
		1899-12-31 23:48:01	3.19	7.63	0.58	3.42	-0.07	-0.09	12.49	0.11	43.47		0.75	-0.22	2.78		-0.110317
		1899-12-31 23:48:01	3.24	7.97	0.57	3.41	-0.07	-0.09	12.45	0.11	43.82		0	-0.12	2.88		-0.109965							12.45	-7.19
2	1899-12-31 00:14:12	GlobalTime	X[m]	Y[m]	Vx[m/s]	Vy[m/s]	Ax[m/s2]	Ay[m/s2]	Speed[km/h]	Acceleration[m/s2]	Space[m]				3
		1899-12-31 00:14:08	1.75	-35.84	-0.09	8.27	0.03	0.05	29.78	0.06	0	36.77	43.17	-3.02	-0.02							29.78	36.77
		1899-12-31 00:14:09	1.74	-35.01	-0.08	8.28	0.04	0.06	29.8	0.08	0.83	35.94	43.12	-2.92	0.08		0.0553882
		1899-12-31 00:14:09	1.73	-34.18	-0.08	8.29	0.05	0.08	29.83	0.09	1.66	35.11	43.06	-2.82	0.18		0.0831521
		1899-12-31 00:14:09	1.72	-33.36	-0.07	8.29	0.06	0.09	29.86	0.11	2.48	34.29	42.97	-2.72	0.28		0.0842508
		1899-12-31 00:14:09	1.72	-32.53	-0.07	8.3	0.07	0.1	29.89	0.12	3.31	33.46	42.87	-2.62	0.38		0.0833194
		1899-12-31 00:14:09	1.71	-31.7	-0.06	8.31	0.08	0.11	29.93	0.14	4.15	32.62	42.75	-2.52	0.48		0.109899
		1899-12-31 00:14:09	1.7	-30.86	-0.05	8.32	0.08	0.12	29.97	0.15	4.98	31.79	42.61	-2.42	0.58		0.111371
		1899-12-31 00:14:09	1.7	-30.03	-0.04	8.34	0.09	0.12	30.01	0.15	5.81	30.96	42.45	-2.32	0.68		0.11152
		1899-12-31 00:14:09	1.7	-29.2	-0.03	8.35	0.09	0.13	30.06	0.16	6.64	30.13	42.27	-2.22	0.78		0.139609
		1899-12-31 00:14:09	1.69	-28.36	-0.02	8.36	0.1	0.12	30.1	0.16	7.48	29.29	42.07	-2.12	0.88		0.110523
		1899-12-31 00:14:09	1.69	-27.52	-0.01	8.37	0.1	0.12	30.15	0.15	8.32	28.45	41.85	-2.02	0.98		0.138361
		1899-12-31 00:14:10	1.69	-26.69	0	8.39	0.1	0.11	30.19	0.15	9.16	27.61	41.61	-1.92	1.08		0.110854
		1899-12-31 00:14:10	1.69	-25.85	0.01	8.4	0.1	0.1	30.23	0.14	9.99	26.78	41.36	-1.82	1.18		0.112338
		1899-12-31 00:14:10	1.69	-25.01	0.02	8.41	0.1	0.08	30.26	0.13	10.83	25.94	41.08	-1.72	1.28		0.0833471
		1899-12-31 00:14:10	1.69	-24.17	0.03	8.41	0.09	0.06	30.29	0.11	11.68	25.09	40.79	-1.62	1.38		0.0824483
		1899-12-31 00:14:10	1.7	-23.32	0.03	8.42	0.09	0.03	30.31	0.09	12.52	24.25	40.47	-1.52	1.48		0.0556658
		1899-12-31 00:14:10	1.7	-22.48	0.04	8.42	0.08	0	30.31	0.08	13.36	23.41	40.14	-1.42	1.58		0
		1899-12-31 00:14:10	1.7	-21.64	0.05	8.42	0.08	-0.04	30.31	0.09	14.2	22.57	39.79	-1.32	1.68		0
		1899-12-31 00:14:10	1.71	-20.8	0.06	8.41	0.07	-0.08	30.29	0.11	15.04	21.73	39.42	-1.22	1.78		-0.0556658
		1899-12-31 00:14:10	1.72	-19.96	0.07	8.4	0.07	-0.13	30.26	0.14	15.88	20.89	39.02	-1.12	1.88		-0.0834298
		1899-12-31 00:14:10	1.72	-19.12	0.07	8.39	0.06	-0.18	30.21	0.19	16.72	20.05	38.61	-1.02	1.98		-0.138866
		1899-12-31 00:14:11	1.73	-18.28	0.08	8.37	0.06	-0.24	30.14	0.24	17.56	19.21	38.18	-0.92	2.08		-0.194026
		1899-12-31 00:14:11	1.74	-17.44	0.08	8.35	0.05	-0.3	30.04	0.3	18.4	18.37	37.73	-0.82	2.18		-0.2764
		1899-12-31 00:14:11	1.75	-16.61	0.09	8.31	0.05	-0.37	29.93	0.37	19.23	17.54	37.26	-0.72	2.28		-0.306629
		1899-12-31 00:14:11	1.76	-15.78	0.09	8.27	0.04	-0.44	29.79	0.44	20.06	16.71	36.77	-0.62	2.38		-0.388629
		1899-12-31 00:14:11	1.77	-14.96	0.1	8.23	0.04	-0.52	29.62	0.52	20.89	15.88	36.26	-0.52	2.48		-0.469457		29.62	15.88	-0.52
		1899-12-31 00:14:11	1.78	-14.14	0.1	8.17	0.04	-0.6	29.42	0.6	21.71	15.06	35.74	-0.42	2.58		-0.555556
		1899-12-31 00:14:11	1.79	-13.32	0.11	8.11	0.04	-0.69	29.19	0.69	22.52	14.25	35.19	-0.32	2.68		-0.642066
		1899-12-31 00:14:11	1.8	-12.51	0.11	8.04	0.04	-0.78	28.94	0.78	23.33	13.44	34.62	-0.22	2.78		-0.692182
		1899-12-31 00:14:11	1.81	-11.72	0.11	7.96	0.04	-0.87	28.65	0.87	24.13	12.64	34.04	-0.12	2.88		-0.805416
		1899-12-31 00:14:11	1.82	-10.92	0.12	7.87	0.04	-0.96	28.32	0.96	24.92	11.85	33.43	-0.02	2.98		-0.918117							28.32	11.85
		1899-12-31 00:14:12	1.83	-10.14	0.12	7.77	0.05	-1.05	27.97	1.05	25.7	11.07	32.81	0.08	3.08		-0.974473
		1899-12-31 00:14:12	1.84	-9.37	0.13	7.66	0.05	-1.14	27.58	1.14	26.47	10.3	32.17	0.18	3.18		-1.08548
		1899-12-31 00:14:12	1.86	-8.61	0.13	7.54	0.05	-1.23	27.16	1.23	27.23	9.54	31.51	0.28	3.28		-1.16709
		1899-12-31 00:14:12	1.87	-7.86	0.14	7.42	0.06	-1.32	26.7	1.32	27.98	8.79	30.83	0.38	3.38		-1.27447
		1899-12-31 00:14:12	1.89	-7.13	0.14	7.28	0.06	-1.4	26.22	1.4	28.71	8.06	30.14	0.48	3.48		-1.34247
		1899-12-31 00:14:12	1.9	-6.41	0.15	7.14	0.06	-1.48	25.71	1.48	29.44	7.33	29.44	0.58	3.58		-1.39969
		1899-12-31 00:14:12	1.92	-5.7	0.16	6.99	0.06	-1.56	25.16	1.56	30.14	6.63	28.71	0.68	3.68		-1.54202
		1899-12-31 00:14:12	1.93	-5.01	0.16	6.83	0.06	-1.63	24.59	1.63	30.83	5.94	27.98	0.78	3.78		-1.58556
		1899-12-31 00:14:12	1.95	-4.33	0.17	6.67	0.06	-1.69	24	1.69	31.51	5.26	27.23	0.88	3.88		-1.6265
		1899-12-31 00:14:12	1.96	-3.68	0.17	6.49	0.06	-1.75	23.39	1.75	32.17	4.6	26.47	0.98	3.98		-1.68981
		1899-12-31 00:14:13	1.98	-3.04	0.18	6.32	0.06	-1.8	22.75	1.8	32.81	3.96	25.7	1.08	4.08		-1.78009
		1899-12-31 00:14:13	2	-2.41	0.19	6.14	0.06	-1.84	22.1	1.84	33.43	3.34	24.92	1.18	4.18		-1.81405
		1899-12-31 00:14:13	2.02	-1.81	0.19	5.95	0.06	-1.88	21.43	1.88	34.04	2.73	24.13	1.28	4.28		-1.84458
		1899-12-31 00:14:13	2.04	-1.22	0.2	5.76	0.06	-1.91	20.76	1.91	34.62	2.15	23.33	1.38	4.38		-1.88027
		1899-12-31 00:14:13	2.06	-0.66	0.2	5.57	0.05	-1.93	20.07	1.93	35.19	1.58	22.52	1.48	4.48		-1.90686
		1899-12-31 00:14:13	2.08	-0.11	0.21	5.38	0.04	-1.94	19.37	1.94	35.74	1.03	21.71	1.58	4.58		-1.93659
		1899-12-31 00:14:13	2.1	0.42	0.21	5.18	0.04	-1.96	18.67	1.96	36.26	0.51	20.89	1.68	4.68		-1.97561
		1899-12-31 00:14:13	2.12	0.93	0.22	4.99	0.03	-1.96	17.97	1.96	36.77	0	20.06	1.78	4.78		-1.94021
		1899-12-31 00:14:13	2.15	1.42	0.22	4.79	0.02	-1.97	17.26	1.97	37.26	-0.49	19.23	1.88	4.88		-1.96943
		1899-12-31 00:14:13	2.17	1.89	0.22	4.59	0.01	-1.97	16.56	1.97	37.73	-0.96	18.4	1.98	4.98		-1.9433
		1899-12-31 00:14:14	2.19	2.34	0.22	4.4	0	-1.96	15.85	1.96	38.18	-1.41	17.56	2.08	5.08		-1.97283
		1899-12-31 00:14:14	2.21	2.77	0.22	4.2	0	-1.96	15.15	1.96	38.61	-1.84	16.72	2.18	5.18		-1.94696
		1899-12-31 00:14:14	2.23	3.18	0.22	4.01	-0.01	-1.95	14.44	1.95	39.02	-2.25	15.88	2.28	5.28		-1.9769
		1899-12-31 00:14:14	2.26	3.57	0.22	3.81	-0.02	-1.95	13.74	1.95	39.42	-2.65	15.04	2.38	5.38		-1.90258
		1899-12-31 00:14:14	2.28	3.94	0.22	3.62	-0.03	-1.94	13.04	1.94	39.79	-3.02	14.2	2.48	5.48		-1.95466
		1899-12-31 00:14:14	2.3	4.29	0.21	3.42	-0.04	-1.93	12.35	1.93	40.14	-3.37	13.36	2.58	5.58		-1.93112
		1899-12-31 00:14:14	2.32	4.62	0.21	3.23	-0.05	-1.93	11.65	1.93	40.47	-3.7	12.52	2.68	5.68		-1.96409
		1899-12-31 00:14:14	2.34	4.94	0.2	3.04	-0.06	-1.92	10.96	1.92	40.79	-4.02	11.68	2.78	5.78		-1.8809
		1899-12-31 00:14:14	2.36	5.23	0.2	2.84	-0.07	-1.92	10.27	1.92	41.08	-4.31	10.83	2.88	5.88		-1.94879
		1899-12-31 00:14:14	2.38	5.5	0.19	2.65	-0.08	-1.92	9.58	1.92	41.36	-4.59	9.99	2.98	5.98		-1.88719
		1899-12-31 00:14:15	2.4	5.76	0.18	2.46	-0.08	-1.92	8.89	1.92	41.61	-4.84	9.16	3.08	6.08		-1.96671
		1899-12-31 00:14:15	2.42	6	0.17	2.27	-0.09	-1.92	8.19	1.92	41.85	-5.08	8.32	3.18	6.18		-1.92194
		1899-12-31 00:14:15	2.43	6.21	0.16	2.08	-0.1	-1.92	7.5	1.92	42.07	-5.3	7.48	3.28	6.28		-1.89852
		1899-12-31 00:14:15	2.45	6.41	0.15	1.89	-0.1	-1.92	6.81	1.93	42.27	-5.5	6.64	3.38	6.38		-1.90469
		1899-12-31 00:14:15	2.47	6.59	0.14	1.69	-0.1	-1.93	6.12	1.93	42.45	-5.68	5.81	3.48	6.48		-1.91223
		1899-12-31 00:14:15	2.48	6.75	0.13	1.5	-0.11	-1.93	5.42	1.93	42.61	-5.84	4.98	3.58	6.58		-1.94782
		1899-12-31 00:14:15	2.49	6.89	0.12	1.31	-0.11	-1.93	4.73	1.93	42.75	-5.98	4.15	3.68	6.68		-1.92998
		1899-12-31 00:14:15	2.5	7.01	0.11	1.11	-0.11	-1.93	4.03	1.93	42.87	-6.1	3.31	3.78	6.78		-1.97145
		1899-12-31 00:14:15	2.51	7.11	0.1	0.92	-0.11	-1.93	3.34	1.93	42.97	-6.2	2.48	3.88	6.88		-1.96192
		1899-12-31 00:14:15	2.52	7.2	0.09	0.73	-0.11	-1.93	2.64	1.93	43.06	-6.29	1.66	3.98	6.98		-1.79441
		1899-12-31 00:14:16	2.53	7.26	0.08	0.54	-0.11	-1.93	1.95	1.93	43.12	-6.35	0.83	4.08	7.08		-2.03646
		1899-12-31 00:14:16	2.54	7.3	0.07	0.34	-0.11	-1.93	1.26	1.93	43.17	-6.4	0	4.18	7.18		-1.70903
3	1899-12-31 19:44:00	GlobalTime	X[m]	Y[m]	Vx[m/s]	Vy[m/s]	Ax[m/s2]	Ay[m/s2]	Speed[km/h]	Acceleration[m/s2]	Space[m]				3
		1899-12-31 19:43:57	1.9	-36.25	0.27	5.27	-0.04	-0.02	18.98	0.05	0	36.97	37.2	-2.41	0.59							18.98	36.97
		1899-12-31 19:43:57	1.93	-35.72	0.27	5.26	-0.05	-0.03	18.97	0.06	0.53	36.44	36.97	-2.31	0.69		-0.0276249
		1899-12-31 19:43:57	1.96	-35.19	0.26	5.26	-0.07	-0.03	18.96	0.07	1.05	35.92	36.74	-2.21	0.79		-0.0281413
		1899-12-31 19:43:57	1.98	-34.67	0.26	5.26	-0.08	-0.04	18.95	0.09	1.58	35.39	36.49	-2.11	0.89		-0.0275958
		1899-12-31 19:43:57	2.01	-34.14	0.25	5.25	-0.09	-0.05	18.93	0.1	2.11	34.86	36.23	-2.01	0.99		-0.0551479
		1899-12-31 19:43:58	2.03	-33.62	0.24	5.25	-0.1	-0.05	18.91	0.11	2.63	34.34	35.97	-1.91	1.09		-0.0561491
		1899-12-31 19:43:58	2.06	-33.09	0.23	5.24	-0.11	-0.06	18.89	0.12	3.16	33.81	35.69	-1.81	1.19		-0.0550314
		1899-12-31 19:43:58	2.08	-32.57	0.22	5.24	-0.12	-0.06	18.87	0.13	3.68	33.29	35.41	-1.71	1.29		-0.0560304
		1899-12-31 19:43:58	2.1	-32.04	0.21	5.23	-0.13	-0.06	18.84	0.14	4.21	32.76	35.11	-1.61	1.39		-0.0823506
		1899-12-31 19:43:58	2.12	-31.52	0.19	5.22	-0.13	-0.07	18.82	0.15	4.73	32.24	34.81	-1.51	1.49		-0.055882
		1899-12-31 19:43:58	2.14	-31	0.18	5.22	-0.14	-0.07	18.79	0.16	5.25	31.72	34.49	-1.41	1.59		-0.0837117
		1899-12-31 19:43:58	2.16	-30.48	0.17	5.21	-0.15	-0.07	18.77	0.16	5.77	31.2	34.17	-1.31	1.69		-0.0557336
		1899-12-31 19:43:58	2.17	-29.96	0.15	5.2	-0.15	-0.07	18.74	0.17	6.29	30.68	33.83	-1.21	1.79		-0.0834891
		1899-12-31 19:43:58	2.19	-29.44	0.14	5.2	-0.15	-0.07	18.71	0.17	6.81	30.16	33.48	-1.11	1.89		-0.0833556
		1899-12-31 19:43:58	2.2	-28.92	0.12	5.19	-0.16	-0.07	18.69	0.17	7.33	29.64	33.12	-1.01	1.99		-0.0554962
		1899-12-31 19:43:59	2.21	-28.4	0.1	5.18	-0.16	-0.06	18.66	0.17	7.85	29.12	32.76	-0.91	2.09		-0.083133
		1899-12-31 19:43:59	2.22	-27.88	0.09	5.18	-0.16	-0.06	18.64	0.17	8.37	28.6	32.38	-0.81	2.19		-0.0553478
		1899-12-31 19:43:59	2.23	-27.36	0.07	5.17	-0.16	-0.06	18.62	0.17	8.89	28.08	31.99	-0.71	2.29		-0.0552885
		1899-12-31 19:43:59	2.23	-26.85	0.06	5.17	-0.15	-0.05	18.6	0.16	9.4	27.57	31.59	-0.61	2.39		-0.056312
		1899-12-31 19:43:59	2.24	-26.33	0.04	5.16	-0.15	-0.04	18.58	0.16	9.92	27.05	31.18	-0.51	2.49		-0.0551698
		1899-12-31 19:43:59	2.24	-25.82	0.03	5.16	-0.15	-0.03	18.57	0.15	10.44	26.53	30.75	-0.41	2.59		-0.0275626
		1899-12-31 19:43:59	2.25	-25.3	0.01	5.15	-0.14	-0.02	18.55	0.15	10.95	26.02	30.32	-0.31	2.69		-0.0561607
		1899-12-31 19:43:59	2.25	-24.78	0	5.15	-0.14	-0.01	18.55	0.14	11.47	25.5	29.88	-0.21	2.79		0
		1899-12-31 19:43:59	2.24	-24.27	-0.02	5.15	-0.13	0.01	18.55	0.13	11.98	24.99	29.43	-0.11	2.89		0
		1899-12-31 19:43:59	2.24	-23.75	-0.03	5.15	-0.13	0.02	18.55	0.13	12.5	24.47	28.97	-0.01	2.99		0							18.55	24.47
		1899-12-31 19:44:00	2.24	-23.24	-0.04	5.16	-0.12	0.04	18.56	0.13	13.01	23.96	28.51	0.09	3.09		0.0280728
		1899-12-31 19:44:00	2.23	-22.72	-0.05	5.16	-0.12	0.06	18.58	0.13	13.53	23.44	28.03	0.19	3.19		0.0551104
		1899-12-31 19:44:00	2.23	-22.21	-0.07	5.17	-0.11	0.07	18.6	0.13	14.05	22.92	27.55	0.29	3.29		0.0551698
		1899-12-31 19:44:00	2.22	-21.69	-0.08	5.17	-0.11	0.09	18.63	0.14	14.56	22.41	27.06	0.39	3.39		0.0844907
		1899-12-31 19:44:00	2.21	-21.17	-0.09	5.18	-0.1	0.1	18.66	0.14	15.08	21.89	26.56	0.49	3.49		0.0829995
		1899-12-31 19:44:00	2.2	-20.65	-0.1	5.19	-0.1	0.11	18.7	0.14	15.6	21.37	26.06	0.59	3.59		0.110874
		1899-12-31 19:44:00	2.19	-20.13	-0.11	5.2	-0.09	0.11	18.74	0.15	16.12	20.85	25.55	0.69	3.69		0.111111
		1899-12-31 19:44:00	2.18	-19.61	-0.12	5.22	-0.09	0.12	18.78	0.15	16.64	20.33	25.04	0.79	3.79		0.111349
		1899-12-31 19:44:00	2.17	-19.09	-0.12	5.23	-0.09	0.12	18.82	0.14	17.16	19.81	24.52	0.89	3.89		0.111586
		1899-12-31 19:44:00	2.16	-18.57	-0.13	5.24	-0.08	0.11	18.87	0.14	17.69	19.28	24	0.99	3.99		0.137178
		1899-12-31 19:44:01	2.14	-18.04	-0.14	5.25	-0.08	0.1	18.91	0.13	18.21	18.76	23.48	1.09	4.09		0.11212
		1899-12-31 19:44:01	2.13	-17.52	-0.15	5.26	-0.08	0.09	18.94	0.12	18.74	18.23	22.96	1.19	4.19		0.0826564
		1899-12-31 19:44:01	2.11	-16.99	-0.16	5.27	-0.07	0.07	18.97	0.1	19.26	17.71	22.43	1.29	4.29		0.0843795
		1899-12-31 19:44:01	2.1	-16.46	-0.16	5.27	-0.07	0.05	19	0.08	19.79	17.18	21.9	1.39	4.39		0.0829184
		1899-12-31 19:44:01	2.08	-15.93	-0.17	5.28	-0.06	0.02	19.01	0.07	20.32	16.65	21.38	1.49	4.49		0.0276686
		1899-12-31 19:44:01	2.06	-15.41	-0.18	5.28	-0.06	-0.01	19.02	0.06	20.85	16.12	20.85	1.59	4.59		0.0276831
		1899-12-31 19:44:01	2.05	-14.88	-0.18	5.28	-0.05	-0.04	19.01	0.07	21.38	15.59	20.32	1.69	4.69		-0.0276831
		1899-12-31 19:44:01	2.03	-14.35	-0.19	5.27	-0.04	-0.08	18.99	0.1	21.9	15.07	19.79	1.79	4.79		-0.0563865
		1899-12-31 19:44:01	2.01	-13.82	-0.19	5.26	-0.04	-0.13	18.96	0.13	22.43	14.54	19.26	1.89	4.89		-0.0828747
		1899-12-31 19:44:01	1.99	-13.3	-0.19	5.25	-0.03	-0.18	18.9	0.18	22.96	14.01	18.74	1.99	4.99		-0.165356
		1899-12-31 19:44:02	1.97	-12.78	-0.2	5.23	-0.02	-0.23	18.84	0.23	23.48	13.49	18.21	2.09	5.09		-0.168002
		1899-12-31 19:44:02	1.95	-12.25	-0.2	5.2	-0.01	-0.28	18.75	0.28	24	12.97	17.69	2.19	5.19		-0.251002
		1899-12-31 19:44:02	1.93	-11.73	-0.2	5.17	-0.01	-0.34	18.64	0.34	24.52	12.45	17.16	2.29	5.29		-0.305147
		1899-12-31 19:44:02	1.91	-11.22	-0.2	5.14	0	-0.4	18.51	0.4	25.04	11.93	16.64	2.39	5.39		-0.358314
		1899-12-31 19:44:02	1.89	-10.71	-0.2	5.1	0.01	-0.46	18.36	0.46	25.55	11.42	16.12	2.49	5.49		-0.418369
		1899-12-31 19:44:02	1.87	-10.2	-0.2	5.05	0.02	-0.52	18.18	0.53	26.06	10.91	15.6	2.59	5.59		-0.497549		18.18	10.91	1.7
		1899-12-31 19:44:02	1.85	-9.7	-0.2	4.99	0.03	-0.59	17.99	0.59	26.56	10.41	15.08	2.69	5.69		-0.53027
		1899-12-31 19:44:02	1.83	-9.2	-0.19	4.93	0.04	-0.65	17.77	0.65	27.06	9.91	14.56	2.79	5.79		-0.607037
		1899-12-31 19:44:02	1.81	-8.71	-0.19	4.86	0.05	-0.71	17.53	0.71	27.55	9.42	14.05	2.89	5.89		-0.667045
		1899-12-31 19:44:02	1.79	-8.23	-0.18	4.79	0.06	-0.76	17.27	0.76	28.03	8.94	13.53	2.99	5.99		-0.727238
		1899-12-31 19:44:03	1.77	-7.75	-0.18	4.71	0.07	-0.81	16.98	0.82	28.51	8.46	13.01	3.09	6.09		-0.79833
		1899-12-31 19:44:03	1.76	-7.29	-0.17	4.63	0.08	-0.86	16.68	0.86	28.97	8	12.5	3.19	6.19		-0.84692
		1899-12-31 19:44:03	1.74	-6.83	-0.16	4.54	0.09	-0.9	16.37	0.91	29.43	7.54	11.98	3.29	6.29		-0.859291
		1899-12-31 19:44:03	1.73	-6.38	-0.15	4.45	0.1	-0.94	16.04	0.95	29.88	7.09	11.47	3.39	6.39		-0.91695
		1899-12-31 19:44:03	1.71	-5.94	-0.14	4.36	0.11	-0.98	15.69	0.98	30.32	6.65	10.95	3.49	6.49		-0.973757
		1899-12-31 19:44:03	1.7	-5.51	-0.13	4.26	0.12	-1	15.34	1.01	30.75	6.22	10.44	3.59	6.59		-0.97442
		1899-12-31 19:44:03	1.69	-5.09	-0.12	4.16	0.13	-1.03	14.97	1.03	31.18	5.79	9.92	3.69	6.69		-1.0062
		1899-12-31 19:44:03	1.67	-4.68	-0.1	4.05	0.13	-1.04	14.6	1.05	31.59	5.38	9.4	3.79	6.79		-1.02952
		1899-12-31 19:44:03	1.67	-4.28	-0.09	3.95	0.14	-1.05	14.22	1.06	31.99	4.98	8.89	3.89	6.89		-1.05629
		1899-12-31 19:44:03	1.66	-3.89	-0.08	3.84	0.14	-1.06	13.84	1.07	32.38	4.59	8.37	3.99	6.99		-1.0548
		1899-12-31 19:44:04	1.65	-3.51	-0.06	3.74	0.15	-1.06	13.46	1.07	32.76	4.21	7.85	4.09	7.09		-1.05324
		1899-12-31 19:44:04	1.64	-3.14	-0.05	3.63	0.15	-1.06	13.08	1.07	33.12	3.85	7.33	4.19	7.19		-1.0808
		1899-12-31 19:44:04	1.64	-2.78	-0.03	3.53	0.15	-1.06	12.69	1.07	33.48	3.49	6.81	4.29	7.29		-1.07706
		1899-12-31 19:44:04	1.64	-2.43	-0.02	3.42	0.16	-1.05	12.31	1.06	33.83	3.14	6.29	4.39	7.39		-1.04718
		1899-12-31 19:44:04	1.64	-2.1	0	3.32	0.16	-1.04	11.94	1.06	34.17	2.8	5.77	4.49	7.49		-1.01812
		1899-12-31 19:44:04	1.64	-1.77	0.02	3.21	0.16	-1.04	11.56	1.05	34.49	2.48	5.25	4.59	7.59		-1.07663
		1899-12-31 19:44:04	1.64	-1.45	0.03	3.11	0.16	-1.03	11.19	1.04	34.81	2.16	4.73	4.69	7.69		-1.01484
		1899-12-31 19:44:04	1.65	-1.15	0.05	3.01	0.16	-1.02	10.82	1.04	35.11	1.86	4.21	4.79	7.79		-1.04729
		1899-12-31 19:44:04	1.65	-0.85	0.06	2.9	0.16	-1.02	10.45	1.03	35.41	1.56	3.68	4.89	7.89		-1.01208
		1899-12-31 19:44:04	1.66	-0.57	0.08	2.8	0.16	-1.01	10.09	1.02	35.69	1.28	3.16	4.99	7.99		-1.01885
		1899-12-31 19:44:05	1.67	-0.29	0.1	2.7	0.16	-1.01	9.73	1.02	35.97	1	2.63	5.09	8.09		-0.983135
		1899-12-31 19:44:05	1.68	-0.03	0.11	2.6	0.16	-1.01	9.37	1.02	36.23	0.74	2.11	5.19	8.19		-1.0203
		1899-12-31 19:44:05	1.69	0.23	0.13	2.5	0.16	-1	9.01	1.02	36.49	0.48	1.58	5.29	8.29		-0.981838
		1899-12-31 19:44:05	1.7	0.47	0.14	2.4	0.16	-1	8.65	1.02	36.74	0.23	1.05	5.39	8.39		-0.981111
		1899-12-31 19:44:05	1.72	0.71	0.16	2.3	0.16	-1	8.29	1.02	36.97	0	0.53	5.49	8.49		-1.02295
		1899-12-31 19:44:05	1.73	0.93	0.18	2.2	0.16	-1	7.94	1.02	37.2	-0.23	0	5.59	8.59		-0.952848
4	1899-12-31 00:37:34	GlobalTime	X[m]	Y[m]	Vx[m/s]	Vy[m/s]	Ax[m/s2]	Ay[m/s2]	Speed[km/h]	Acceleration[m/s2]	Space[m]	Distance to stop-line			3
		1899-12-31 00:37:36	2.86	-38.68	-0.22	8.71	0.04	-0.14	31.36	0.15	0	-40.56	40.56	1.8	4.8
		1899-12-31 00:37:36	2.84	-37.81	-0.22	8.69	0.05	-0.19	31.3	0.19	0.87	-39.69	40.49	1.93	4.93		-0.16672
		1899-12-31 00:37:36	2.82	-36.94	-0.21	8.67	0.07	-0.23	31.23	0.24	1.74	-38.82	40.41	2.03	5.03		-0.194103
		1899-12-31 00:37:36	2.8	-36.07	-0.2	8.65	0.08	-0.27	31.14	0.28	2.61	-37.95	40.31	2.13	5.13		-0.248922
		1899-12-31 00:37:36	2.78	-35.21	-0.19	8.62	0.09	-0.31	31.04	0.33	3.47	-37.09	40.19	2.23	5.23		-0.278944
		1899-12-31 00:37:36	2.76	-34.35	-0.19	8.59	0.1	-0.36	30.92	0.37	4.33	-36.23	40.05	2.33	5.33		-0.333549
		1899-12-31 00:37:36	2.74	-33.49	-0.17	8.55	0.11	-0.4	30.78	0.41	5.19	-35.37	39.89	2.43	5.43		-0.387507
		1899-12-31 00:37:36	2.73	-32.64	-0.16	8.51	0.12	-0.44	30.64	0.45	6.04	-34.52	39.72	2.53	5.53		-0.390287		30.47	-33.67	1.8
		1899-12-31 00:37:36	2.71	-31.79	-0.15	8.46	0.13	-0.48	30.47	0.5	6.89	-33.67	39.53	2.63	5.63		-0.471528
		1899-12-31 00:37:36	2.7	-30.95	-0.14	8.41	0.14	-0.52	30.29	0.54	7.73	-32.83	39.32	2.73	5.73		-0.502315
		1899-12-31 00:37:37	2.68	-30.11	-0.12	8.36	0.15	-0.56	30.1	0.58	8.57	-31.99	39.09	2.83	5.83		-0.526992
		1899-12-31 00:37:37	2.67	-29.28	-0.11	8.3	0.15	-0.61	29.89	0.63	9.4	-31.16	38.85	2.93	5.93		-0.585578
		1899-12-31 00:37:37	2.66	-28.45	-0.09	8.24	0.16	-0.66	29.67	0.67	10.23	-30.33	38.59	3.03	6.03		-0.609066
		1899-12-31 00:37:37	2.65	-27.63	-0.08	8.17	0.16	-0.7	29.42	0.72	11.05	-29.51	38.32	3.13	6.13		-0.695033
		1899-12-31 00:37:37	2.65	-26.81	-0.06	8.1	0.17	-0.75	29.16	0.77	11.87	-28.69	38.03	3.23	6.23		-0.716595
		1899-12-31 00:37:37	2.64	-26.01	-0.04	8.02	0.17	-0.8	28.89	0.82	12.67	-27.89	37.73	3.33	6.33		-0.755859
		1899-12-31 00:37:37	2.64	-25.21	-0.03	7.94	0.17	-0.86	28.59	0.87	13.47	-27.09	37.41	3.43	6.43		-0.831597
		1899-12-31 00:37:37	2.64	-24.42	-0.01	7.85	0.16	-0.91	28.28	0.92	14.26	-26.3	37.08	3.53	6.53		-0.86096
		1899-12-31 00:37:37	2.64	-23.64	0.01	7.76	0.16	-0.96	27.94	0.98	15.04	-25.52	36.75	3.63	6.63		-0.945453
		1899-12-31 00:37:37	2.64	-22.87	0.02	7.66	0.15	-1.02	27.59	1.03	15.81	-24.75	36.4	3.73	6.73		-0.973801
		1899-12-31 00:37:38	2.64	-22.11	0.04	7.56	0.15	-1.07	27.22	1.08	16.57	-23.99	36.04	3.83	6.83		-1.02947
		1899-12-31 00:37:38	2.65	-21.36	0.05	7.45	0.14	-1.12	26.83	1.13	17.32	-23.24	35.67	3.93	6.93		-1.08434
		1899-12-31 00:37:38	2.65	-20.62	0.07	7.34	0.13	-1.17	26.42	1.18	18.06	-22.5	35.29	4.03	7.03		-1.13825
		1899-12-31 00:37:38	2.66	-19.89	0.08	7.22	0.13	-1.22	25.99	1.22	18.79	-21.77	34.9	4.13	7.13		-1.19104
		1899-12-31 00:37:38	2.67	-19.17	0.09	7.1	0.12	-1.26	25.55	1.26	19.51	-21.05	34.51	4.23	7.23		-1.21515
		1899-12-31 00:37:38	2.68	-18.47	0.1	6.97	0.11	-1.29	25.09	1.3	20.21	-20.35	34.11	4.33	7.33		-1.28386
		1899-12-31 00:37:38	2.69	-17.78	0.11	6.84	0.11	-1.32	24.62	1.33	20.9	-19.66	33.7	4.43	7.43		-1.30634
		1899-12-31 00:37:38	2.7	-17.1	0.12	6.71	0.1	-1.35	24.15	1.35	21.58	-18.98	33.28	4.53	7.53		-1.30049
		1899-12-31 00:37:38	2.71	-16.44	0.13	6.57	0.1	-1.37	23.66	1.37	22.24	-18.32	32.86	4.63	7.63		-1.36942
		1899-12-31 00:37:38	2.73	-15.79	0.14	6.43	0.1	-1.38	23.17	1.38	22.89	-17.67	32.43	4.73	7.73		-1.36198
		1899-12-31 00:37:39	2.74	-15.15	0.15	6.3	0.1	-1.38	22.67	1.39	23.53	-17.03	31.99	4.83	7.83		-1.38166
		1899-12-31 00:37:39	2.76	-14.53	0.16	6.16	0.1	-1.38	22.17	1.39	24.15	-16.41	31.54	4.93	7.93		-1.39511
		1899-12-31 00:37:39	2.77	-13.92	0.17	6.02	0.1	-1.38	21.68	1.38	24.76	-15.8	31.08	5.03	8.03		-1.35894
		1899-12-31 00:37:39	2.79	-13.32	0.18	5.88	0.1	-1.36	21.18	1.36	25.36	-15.2	30.62	5.13	8.13		-1.37796
		1899-12-31 00:37:39	2.81	-12.74	0.19	5.75	0.1	-1.34	20.7	1.34	25.94	-14.62	30.14	5.23	8.23		-1.33716
		1899-12-31 00:37:39	2.83	-12.18	0.2	5.61	0.1	-1.31	20.22	1.31	26.51	-14.05	29.65	5.33	8.33		-1.32943
		1899-12-31 00:37:39	2.85	-11.62	0.21	5.48	0.1	-1.28	19.75	1.28	27.06	-13.5	29.16	5.43	8.43		-1.31775
		1899-12-31 00:37:39	2.87	-11.08	0.22	5.36	0.1	-1.24	19.3	1.24	27.6	-12.96	28.65	5.53	8.53		-1.25547
		1899-12-31 00:37:39	2.89	-10.55	0.23	5.23	0.1	-1.19	18.86	1.2	28.13	-12.43	28.13	5.63	8.63		-1.22222
		1899-12-31 00:37:39	2.92	-10.03	0.24	5.12	0.1	-1.15	18.44	1.15	28.65	-11.91	27.6	5.73	8.73		-1.1623
		1899-12-31 00:37:40	2.94	-9.53	0.25	5	0.09	-1.1	18.04	1.1	29.16	-11.4	27.06	5.83	8.83		-1.10385
		1899-12-31 00:37:40	2.97	-9.03	0.26	4.9	0.09	-1.05	17.65	1.05	29.65	-10.91	26.51	5.93	8.93		-1.09592
		1899-12-31 00:37:40	2.99	-8.55	0.27	4.79	0.08	-1	17.28	1	30.14	-10.42	25.94	6.03	9.03		-1.01758
		1899-12-31 00:37:40	3.02	-8.07	0.28	4.7	0.08	-0.95	16.93	0.95	30.62	-9.94	25.36	6.13	9.13		-0.962376
		1899-12-31 00:37:40	3.05	-7.61	0.28	4.6	0.07	-0.9	16.6	0.9	31.08	-9.48	24.76	6.23	9.23		-0.928014
		1899-12-31 00:37:40	3.08	-7.15	0.29	4.51	0.06	-0.86	16.28	0.86	31.54	-9.02	24.15	6.33	9.33		-0.882448
		1899-12-31 00:37:40	3.11	-6.7	0.3	4.43	0.05	-0.82	15.98	0.82	31.99	-8.57	23.53	6.43	9.43		-0.829733
		1899-12-31 00:37:40	3.14	-6.27	0.3	4.35	0.04	-0.79	15.69	0.79	32.43	-8.13	22.89	6.53	9.53		-0.805301
		1899-12-31 00:37:40	3.17	-5.83	0.3	4.27	0.03	-0.77	15.41	0.77	32.86	-7.7	22.24	6.63	9.63		-0.781295
		1899-12-31 00:37:40	3.2	-5.41	0.31	4.19	0.02	-0.75	15.13	0.75	33.28	-7.28	21.58	6.73	9.73		-0.785494
		1899-12-31 00:37:41	3.23	-5	0.31	4.12	0	-0.75	14.86	0.75	33.7	-6.86	20.9	6.83	9.83		-0.7438
		1899-12-31 00:37:41	3.26	-4.59	0.31	4.04	-0.01	-0.75	14.6	0.75	34.11	-6.45	20.21	6.93	9.93		-0.720754
		1899-12-31 00:37:41	3.29	-4.19	0.31	3.97	-0.02	-0.77	14.32	0.77	34.51	-6.05	19.51	7.03	10.03		-0.781019
		1899-12-31 00:37:41	3.32	-3.79	0.3	3.89	-0.03	-0.79	14.04	0.8	34.9	-5.66	18.79	7.13	10.13		-0.785533
		1899-12-31 00:37:41	3.35	-3.41	0.3	3.81	-0.04	-0.83	13.75	0.83	35.29	-5.27	18.06	7.23	10.23		-0.797236
		1899-12-31 00:37:41	3.38	-3.03	0.3	3.72	-0.05	-0.88	13.45	0.88	35.67	-4.89	17.32	7.33	10.33		-0.82846
		1899-12-31 00:37:41	3.41	-2.67	0.29	3.63	-0.06	-0.94	13.12	0.94	36.04	-4.52	16.57	7.43	10.43		-0.914258
		1899-12-31 00:37:41	3.44	-2.31	0.28	3.54	-0.07	-1.01	12.77	1.01	36.4	-4.16	15.81	7.53	10.53		-0.971097
		1899-12-31 00:37:41	3.47	-1.96	0.28	3.43	-0.07	-1.08	12.4	1.09	36.75	-3.81	15.04	7.63	10.63		-1.02655
		1899-12-31 00:37:41	3.5	-1.62	0.27	3.32	-0.08	-1.16	12	1.17	37.08	-3.48	14.26	7.73	10.73		-1.14104
		1899-12-31 00:37:42	3.52	-1.29	0.26	3.2	-0.08	-1.24	11.57	1.25	37.41	-3.15	13.47	7.83	10.83		-1.18489
		1899-12-31 00:37:42	3.55	-0.98	0.25	3.08	-0.08	-1.32	11.11	1.33	37.73	-2.83	12.67	7.93	10.93		-1.25781
		1899-12-31 00:37:42	3.57	-0.68	0.25	2.94	-0.09	-1.4	10.63	1.4	38.03	-2.53	11.87	8.03	11.03		-1.34198
		1899-12-31 00:37:42	3.6	-0.39	0.24	2.8	-0.09	-1.47	10.11	1.48	38.32	-2.24	11.05	8.13	11.13		-1.43476
		1899-12-31 00:37:42	3.62	-0.12	0.23	2.65	-0.09	-1.54	9.57	1.54	38.59	-1.97	10.23	8.23	11.23		-1.51852
		1899-12-31 00:37:42	3.64	0.14	0.22	2.49	-0.1	-1.6	9.01	1.6	38.85	-1.71	9.4	8.33	11.33		-1.54392
		1899-12-31 00:37:42	3.66	0.38	0.21	2.33	-0.1	-1.65	8.43	1.65	39.09	-1.47	8.57	8.43	11.43		-1.62603
		1899-12-31 00:37:42	3.68	0.6	0.2	2.17	-0.11	-1.69	7.83	1.69	39.32	-1.24	7.73	8.53	11.53		-1.63647
		1899-12-31 00:37:42	3.7	0.81	0.19	2	-0.11	-1.72	7.21	1.73	39.53	-1.03	6.89	8.63	11.63		-1.71311
		1899-12-31 00:37:42	3.72	1	0.18	1.82	-0.12	-1.75	6.59	1.76	39.72	-0.84	6.04	8.73	11.73		-1.73733
		1899-12-31 00:37:43	3.74	1.18	0.16	1.65	-0.12	-1.77	5.95	1.78	39.89	-0.67	5.19	8.83	11.83		-1.82135
		1899-12-31 00:37:43	3.76	1.33	0.15	1.47	-0.12	-1.79	5.31	1.79	40.05	-0.51	4.33	8.93	11.93		-1.73765
		1899-12-31 00:37:43	3.77	1.47	0.14	1.29	-0.12	-1.8	4.67	1.8	40.19	-0.37	3.47	9.03	12.03		-1.76014
		1899-12-31 00:37:43	3.78	1.59	0.13	1.11	-0.13	-1.8	4.02	1.81	40.31	-0.25	2.61	9.13	12.13		-1.816
		1899-12-31 00:37:43	3.8	1.69	0.12	0.93	-0.13	-1.81	3.37	1.81	40.41	-0.15	1.74	9.23	12.23		-1.8532
		1899-12-31 00:37:43	3.81	1.78	0.1	0.75	-0.13	-1.81	2.72	1.81	40.49	-0.07	0.87	9.33	12.33		-1.909
		1899-12-31 00:37:43	3.82	1.84	0.09	0.57	-0.13	-1.81	2.07	1.81	40.56	0	0	9.43	12.43		-1.71599
5	1899-12-31 01:43:03	GlobalTime	X[m]	Y[m]	Vx[m/s]	Vy[m/s]	Ax[m/s2]	Ay[m/s2]	Speed[km/h]	Acceleration[m/s2]	Space[m]				3
		1899-12-31 01:43:03	3.05	-38.68	-0.49	6.15	0.07	-0.06	22.22	0.09	0	-47.12	47.12	0.86	3.86									22.22	-47.12
		1899-12-31 01:43:03	3	-38.07	-0.48	6.15	0.1	-0.07	22.19	0.12	0.62	-46.5	46.98	0.96	3.96		-0.082904
		1899-12-31 01:43:04	2.96	-37.46	-0.47	6.14	0.12	-0.09	22.16	0.15	1.23	-45.89	46.84	1.06	4.06		-0.0841492
		1899-12-31 01:43:04	2.91	-36.84	-0.46	6.13	0.14	-0.11	22.12	0.18	1.85	-45.27	46.68	1.16	4.16		-0.110215
		1899-12-31 01:43:04	2.86	-36.23	-0.45	6.12	0.16	-0.12	22.08	0.21	2.46	-44.66	46.52	1.26	4.26		-0.111819
		1899-12-31 01:43:04	2.82	-35.62	-0.43	6.1	0.18	-0.14	22.03	0.23	3.07	-44.05	46.34	1.36	4.36		-0.13949
		1899-12-31 01:43:04	2.78	-35.01	-0.41	6.09	0.21	-0.15	21.97	0.26	3.69	-43.43	46.15	1.46	4.46		-0.164277
		1899-12-31 01:43:04	2.74	-34.4	-0.39	6.07	0.22	-0.16	21.91	0.28	4.3	-42.82	45.96	1.56	4.56		-0.166515
		1899-12-31 01:43:04	2.7	-33.79	-0.37	6.06	0.24	-0.17	21.84	0.3	4.9	-42.22	45.75	1.66	4.66		-0.19692
		1899-12-31 01:43:04	2.66	-33.19	-0.34	6.04	0.26	-0.18	21.78	0.31	5.51	-41.61	45.54	1.76	4.76		-0.165528
		1899-12-31 01:43:04	2.63	-32.59	-0.32	6.02	0.27	-0.19	21.7	0.33	6.11	-41.01	45.31	1.86	4.86		-0.223663
		1899-12-31 01:43:04	2.6	-31.99	-0.29	6	0.28	-0.19	21.63	0.34	6.71	-40.41	45.07	1.96	4.96		-0.19503
		1899-12-31 01:43:05	2.57	-31.39	-0.26	5.98	0.29	-0.19	21.56	0.35	7.31	-39.81	44.83	2.06	5.06		-0.194399
		1899-12-31 01:43:05	2.55	-30.79	-0.23	5.96	0.3	-0.19	21.49	0.35	7.91	-39.21	44.58	2.16	5.16		-0.193769
		1899-12-31 01:43:05	2.53	-30.19	-0.2	5.95	0.3	-0.19	21.42	0.36	8.51	-38.61	44.32	2.26	5.26		-0.193139
		1899-12-31 01:43:05	2.51	-29.6	-0.17	5.93	0.3	-0.18	21.35	0.36	9.1	-38.02	44.05	2.36	5.36		-0.195772
		1899-12-31 01:43:05	2.49	-29.01	-0.14	5.91	0.3	-0.18	21.28	0.35	9.69	-37.43	43.78	2.46	5.46		-0.195131
		1899-12-31 01:43:05	2.48	-28.42	-0.11	5.89	0.3	-0.17	21.21	0.35	10.28	-36.84	43.5	2.56	5.56		-0.19449
		1899-12-31 01:43:05	2.47	-27.83	-0.08	5.87	0.3	-0.17	21.15	0.34	10.87	-36.25	43.21	2.66	5.66		-0.166196
		1899-12-31 01:43:05	2.47	-27.24	-0.05	5.86	0.29	-0.16	21.09	0.33	11.46	-35.66	42.92	2.76	5.76		-0.165725
		1899-12-31 01:43:05	2.46	-26.66	-0.02	5.84	0.28	-0.15	21.03	0.32	12.04	-35.08	42.62	2.86	5.86		-0.168103
		1899-12-31 01:43:05	2.46	-26.07	0.01	5.83	0.27	-0.15	20.98	0.31	12.63	-34.49	42.32	2.96	5.96		-0.137352
		1899-12-31 01:43:06	2.46	-25.49	0.03	5.81	0.26	-0.14	20.93	0.29	13.21	-33.91	42.02	3.06	6.06		-0.139388
		1899-12-31 01:43:06	2.47	-24.91	0.06	5.8	0.24	-0.14	20.88	0.28	13.79	-33.33	41.71	3.16	6.16		-0.139055
		1899-12-31 01:43:06	2.48	-24.33	0.08	5.78	0.23	-0.14	20.83	0.27	14.37	-32.75	41.39	3.26	6.26		-0.138723
		1899-12-31 01:43:06	2.49	-23.75	0.1	5.77	0.21	-0.14	20.78	0.26	14.95	-32.17	41.08	3.36	6.36		-0.13839
		1899-12-31 01:43:06	2.5	-23.18	0.13	5.76	0.2	-0.15	20.73	0.24	15.52	-31.6	40.76	3.46	6.46		-0.140479
		1899-12-31 01:43:06	2.51	-22.6	0.14	5.74	0.18	-0.15	20.67	0.23	16.1	-31.02	40.43	3.56	6.56		-0.16523
		1899-12-31 01:43:06	2.53	-22.03	0.16	5.73	0.16	-0.16	20.62	0.23	16.67	-30.45	40.1	3.66	6.66		-0.139735
		1899-12-31 01:43:06	2.54	-21.46	0.18	5.71	0.14	-0.17	20.56	0.22	17.24	-29.88	39.77	3.76	6.76		-0.167235
		1899-12-31 01:43:06	2.56	-20.89	0.19	5.69	0.12	-0.18	20.5	0.22	17.81	-29.31	39.43	3.86	6.86		-0.166748
		1899-12-31 01:43:06	2.58	-20.32	0.2	5.67	0.1	-0.19	20.44	0.22	18.38	-28.74	39.09	3.96	6.96		-0.166261
		1899-12-31 01:43:07	2.6	-19.75	0.21	5.65	0.09	-0.2	20.37	0.22	18.95	-28.17	38.74	4.06	7.06		-0.193355
		1899-12-31 01:43:07	2.62	-19.19	0.22	5.63	0.07	-0.22	20.3	0.23	19.51	-27.61	38.39	4.16	7.16		-0.196132
		1899-12-31 01:43:07	2.64	-18.63	0.23	5.61	0.05	-0.23	20.22	0.24	20.08	-27.04	38.04	4.26	7.26		-0.219407
		1899-12-31 01:43:07	2.67	-18.07	0.23	5.59	0.04	-0.25	20.13	0.26	20.64	-26.48	37.67	4.36	7.36		-0.250186
		1899-12-31 01:43:07	2.69	-17.51	0.23	5.56	0.02	-0.27	20.04	0.27	21.2	-25.92	37.3	4.46	7.46		-0.24907
		1899-12-31 01:43:07	2.71	-16.96	0.24	5.53	0.01	-0.29	19.94	0.29	21.75	-25.37	36.93	4.56	7.56		-0.280443
		1899-12-31 01:43:07	2.74	-16.4	0.24	5.5	-0.01	-0.32	19.83	0.32	22.3	-24.82	36.55	4.66	7.66		-0.306867
		1899-12-31 01:43:07	2.76	-15.85	0.23	5.47	-0.02	-0.34	19.71	0.34	22.85	-24.27	36.16	4.76	7.76		-0.332828
		1899-12-31 01:43:07	2.78	-15.31	0.23	5.44	-0.03	-0.37	19.59	0.37	23.4	-23.72	35.77	4.86	7.86		-0.330808
		1899-12-31 01:43:07	2.81	-14.77	0.23	5.4	-0.04	-0.39	19.45	0.39	23.94	-23.18	35.37	4.96	7.96		-0.390489
		1899-12-31 01:43:08	2.83	-14.23	0.23	5.36	-0.04	-0.42	19.31	0.42	24.48	-22.64	34.96	5.06	8.06		-0.387689
		1899-12-31 01:43:08	2.85	-13.7	0.22	5.32	-0.05	-0.44	19.15	0.45	25.01	-22.11	34.55	5.16	8.16		-0.447939
		1899-12-31 01:43:08	2.87	-13.17	0.22	5.27	-0.06	-0.47	18.99	0.47	25.54	-21.58	34.13	5.26	8.26		-0.444212
		1899-12-31 01:43:08	2.9	-12.64	0.21	5.22	-0.06	-0.49	18.82	0.5	26.07	-21.05	33.71	5.36	8.36		-0.467891		18.82	-21.05	2
		1899-12-31 01:43:08	2.92	-12.12	0.2	5.17	-0.06	-0.52	18.63	0.52	26.59	-20.53	33.27	5.46	8.46		-0.527919
		1899-12-31 01:43:08	2.94	-11.61	0.2	5.12	-0.07	-0.54	18.45	0.54	27.1	-20.02	32.83	5.56	8.56		-0.504902
		1899-12-31 01:43:08	2.96	-11.1	0.19	5.07	-0.07	-0.55	18.25	0.56	27.61	-19.51	32.39	5.66	8.66		-0.555253
		1899-12-31 01:43:08	2.97	-10.59	0.18	5.01	-0.07	-0.57	18.05	0.57	28.12	-19	31.94	5.76	8.76		-0.549201
		1899-12-31 01:43:08	2.99	-10.1	0.18	4.95	-0.07	-0.58	17.84	0.58	28.62	-18.5	31.48	5.86	8.86		-0.581551
		1899-12-31 01:43:08	3.01	-9.6	0.17	4.89	-0.08	-0.58	17.63	0.59	29.11	-18.01	31.02	5.96	8.96		-0.586475
		1899-12-31 01:43:09	3.03	-9.12	0.16	4.84	-0.08	-0.59	17.42	0.6	29.59	-17.53	30.55	6.06	9.06		-0.591604
		1899-12-31 01:43:09	3.04	-8.64	0.15	4.78	-0.08	-0.59	17.21	0.6	30.08	-17.04	30.08	6.16	9.16		-0.572586
		1899-12-31 01:43:09	3.06	-8.16	0.14	4.72	-0.09	-0.6	16.99	0.6	30.55	-16.57	29.59	6.26	9.26		-0.617612
		1899-12-31 01:43:09	3.07	-7.69	0.14	4.66	-0.09	-0.6	16.78	0.61	31.02	-16.1	29.11	6.36	9.36		-0.582127
		1899-12-31 01:43:09	3.08	-7.23	0.13	4.6	-0.09	-0.61	16.56	0.61	31.48	-15.64	28.62	6.46	9.46		-0.61517
		1899-12-31 01:43:09	3.1	-6.77	0.12	4.54	-0.1	-0.61	16.34	0.62	31.94	-15.18	28.12	6.56	9.56		-0.607052
		1899-12-31 01:43:09	3.11	-6.32	0.11	4.48	-0.1	-0.62	16.12	0.63	32.39	-14.73	27.61	6.66	9.66		-0.612243
		1899-12-31 01:43:09	3.12	-5.88	0.1	4.41	-0.1	-0.62	15.89	0.63	32.83	-14.29	27.1	6.76	9.76		-0.645544
		1899-12-31 01:43:09	3.13	-5.44	0.09	4.35	-0.1	-0.63	15.67	0.64	33.27	-13.85	26.59	6.86	9.86		-0.608796
		1899-12-31 01:43:09	3.14	-5.01	0.08	4.29	-0.1	-0.64	15.44	0.64	33.71	-13.41	26.07	6.96	9.96		-0.627394
		1899-12-31 01:43:10	3.14	-4.58	0.07	4.22	-0.1	-0.64	15.21	0.65	34.13	-12.99	25.54	7.06	10.06		-0.647551
		1899-12-31 01:43:10	3.15	-4.16	0.06	4.16	-0.1	-0.64	14.98	0.65	34.55	-12.57	25.01	7.16	10.16		-0.637833
		1899-12-31 01:43:10	3.15	-3.75	0.05	4.1	-0.1	-0.65	14.74	0.65	34.96	-12.16	24.48	7.26	10.26		-0.671183
		1899-12-31 01:43:10	3.16	-3.34	0.04	4.03	-0.09	-0.65	14.51	0.65	35.37	-11.75	23.94	7.36	10.36		-0.633045
		1899-12-31 01:43:10	3.16	-2.95	0.03	3.97	-0.09	-0.64	14.28	0.65	35.77	-11.35	23.4	7.46	10.46		-0.638667
		1899-12-31 01:43:10	3.16	-2.55	0.02	3.9	-0.1	-0.64	14.05	0.64	36.16	-10.96	22.85	7.56	10.56		-0.644577
		1899-12-31 01:43:10	3.17	-2.16	0.01	3.84	-0.1	-0.63	13.82	0.64	36.55	-10.57	22.3	7.66	10.66		-0.634111
		1899-12-31 01:43:10	3.17	-1.78	0	3.78	-0.1	-0.61	13.59	0.62	36.93	-10.19	21.75	7.76	10.76		-0.640056
		1899-12-31 01:43:10	3.17	-1.41	-0.01	3.71	-0.1	-0.6	13.37	0.61	37.3	-9.82	21.2	7.86	10.86		-0.618452
		1899-12-31 01:43:10	3.16	-1.04	-0.02	3.66	-0.11	-0.58	13.16	0.59	37.67	-9.45	20.64	7.96	10.96		-0.580925
		1899-12-31 01:43:11	3.16	-0.68	-0.03	3.6	-0.11	-0.55	12.96	0.57	38.04	-9.08	20.08	8.06	11.06		-0.544711
		1899-12-31 01:43:11	3.16	-0.32	-0.04	3.54	-0.12	-0.53	12.76	0.54	38.39	-8.73	19.51	8.16	11.16		-0.567019
		1899-12-31 01:43:11	3.15	0.03	-0.05	3.49	-0.12	-0.51	12.57	0.52	38.74	-8.38	18.95	8.26	11.26		-0.5305
		1899-12-31 01:43:11	3.15	0.38	-0.07	3.44	-0.12	-0.48	12.39	0.5	39.09	-8.03	18.38	8.36	11.36		-0.495238
		1899-12-31 01:43:11	3.14	0.72	-0.08	3.39	-0.13	-0.46	12.22	0.48	39.43	-7.69	17.81	8.46	11.46		-0.47473
		1899-12-31 01:43:11	3.13	1.06	-0.09	3.35	-0.13	-0.44	12.06	0.46	39.77	-7.35	17.24	8.56	11.56		-0.440813
		1899-12-31 01:43:11	3.12	1.39	-0.1	3.31	-0.13	-0.42	11.91	0.44	40.1	-7.02	16.67	8.66	11.66		-0.420349
		1899-12-31 01:43:11	3.11	1.72	-0.12	3.26	-0.13	-0.4	11.76	0.42	40.43	-6.69	16.1	8.76	11.76		-0.415088
		1899-12-31 01:43:11	3.1	2.04	-0.13	3.22	-0.12	-0.39	11.62	0.41	40.76	-6.36	15.52	8.86	11.86		-0.382669
		1899-12-31 01:43:11	3.09	2.36	-0.14	3.19	-0.12	-0.38	11.48	0.4	41.08	-6.04	14.95	8.96	11.96		-0.389902
		1899-12-31 01:43:12	3.07	2.68	-0.15	3.15	-0.12	-0.39	11.34	0.4	41.39	-5.73	14.37	9.06	12.06		-0.397601
		1899-12-31 01:43:12	3.06	2.99	-0.16	3.11	-0.11	-0.39	11.21	0.41	41.71	-5.41	13.79	9.16	12.16		-0.353431
		1899-12-31 01:43:12	3.04	3.3	-0.18	3.07	-0.1	-0.41	11.07	0.42	42.02	-5.1	13.21	9.26	12.26		-0.388192
		1899-12-31 01:43:12	3.02	3.61	-0.19	3.03	-0.1	-0.44	10.92	0.45	42.32	-4.8	12.63	9.36	12.36		-0.42419
		1899-12-31 01:43:12	3	3.91	-0.19	2.98	-0.09	-0.47	10.76	0.48	42.62	-4.5	12.04	9.46	12.46		-0.446091
		1899-12-31 01:43:12	2.98	4.2	-0.2	2.93	-0.08	-0.51	10.59	0.51	42.92	-4.2	11.46	9.56	12.56		-0.466757
		1899-12-31 01:43:12	2.96	4.49	-0.21	2.88	-0.08	-0.55	10.4	0.56	43.21	-3.91	10.87	9.66	12.66		-0.530558
		1899-12-31 01:43:12	2.94	4.78	-0.22	2.83	-0.07	-0.6	10.2	0.6	43.5	-3.62	10.28	9.76	12.76		-0.548106
		1899-12-31 01:43:12	2.92	5.06	-0.23	2.76	-0.07	-0.65	9.98	0.65	43.78	-3.34	9.69	9.86	12.86		-0.611717
		1899-12-31 01:43:12	2.89	5.33	-0.23	2.7	-0.06	-0.7	9.75	0.71	44.05	-3.07	9.1	9.96	12.96		-0.64842
		1899-12-31 01:43:13	2.87	5.6	-0.24	2.63	-0.06	-0.76	9.49	0.76	44.32	-2.8	8.51	10.06	13.06		-0.714792
		1899-12-31 01:43:13	2.85	5.86	-0.24	2.55	-0.05	-0.81	9.21	0.81	44.58	-2.54	7.91	10.16	13.16		-0.776947
		1899-12-31 01:43:13	2.82	6.11	-0.25	2.47	-0.05	-0.86	8.92	0.86	44.83	-2.29	7.31	10.26	13.26		-0.811373
		1899-12-31 01:43:13	2.8	6.35	-0.25	2.38	-0.04	-0.9	8.61	0.9	45.07	-2.05	6.71	10.36	13.36		-0.873569
		1899-12-31 01:43:13	2.77	6.58	-0.26	2.29	-0.04	-0.94	8.28	0.94	45.31	-1.81	6.11	10.46	13.46		-0.895978
		1899-12-31 01:43:13	2.74	6.81	-0.26	2.19	-0.03	-0.97	7.95	0.97	45.54	-1.58	5.51	10.56	13.56		-0.8984
		1899-12-31 01:43:13	2.72	7.02	-0.26	2.09	-0.03	-0.99	7.6	0.99	45.75	-1.37	4.9	10.66	13.66		-0.999871
		1899-12-31 01:43:13	2.69	7.22	-0.27	1.99	-0.03	-1.01	7.24	1.01	45.96	-1.16	4.3	10.76	13.76		-0.981481
		1899-12-31 01:43:13	2.66	7.42	-0.27	1.89	-0.02	-1.03	6.88	1.03	46.15	-0.97	3.69	10.86	13.86		-1.03216
		1899-12-31 01:43:13	2.64	7.6	-0.27	1.79	-0.02	-1.04	6.52	1.04	46.34	-0.78	3.07	10.96	13.96		-0.979532
		1899-12-31 01:43:14	2.61	7.78	-0.27	1.69	-0.02	-1.04	6.15	1.04	46.52	-0.6	2.46	11.06	14.06		-1.00478
		1899-12-31 01:43:14	2.58	7.94	-0.28	1.58	-0.02	-1.05	5.78	1.05	46.68	-0.44	1.85	11.16	14.16		-1.06436
		1899-12-31 01:43:14	2.56	8.09	-0.28	1.48	-0.02	-1.05	5.41	1.05	46.84	-0.28	1.23	11.26	14.26		-0.998336
		1899-12-31 01:43:14	2.53	8.24	-0.28	1.37	-0.02	-1.05	5.04	1.05	46.98	-0.14	0.62	11.36	14.36		-1.0655
		1899-12-31 01:43:14	2.5	8.37	-0.28	1.27	-0.02	-1.05	4.67	1.05	47.12	0	0	11.46	14.46		-0.990052
6	1899-12-31 02:04:58	GlobalTime	X[m]	Y[m]	Vx[m/s]	Vy[m/s]	Ax[m/s2]	Ay[m/s2]	Speed[km/h]	Acceleration[m/s2]	Space[m]				3
		1899-12-31 02:04:58	2.79	-39.08	-0.16	9.29	0	-0.12	33.43	0.12	0	-47.28	47.28	0	3									33.43	-47.28
		1899-12-31 02:04:59	2.78	-38.15	-0.16	9.27	0	-0.16	33.38	0.16	0.93	-46.35	47.04	0.1	3.1		-0.138578
		1899-12-31 02:04:59	2.76	-37.22	-0.16	9.26	0	-0.19	33.32	0.19	1.85	-45.43	46.8	0.2	3.2		-0.167824
		1899-12-31 02:04:59	2.75	-36.3	-0.16	9.23	0.01	-0.23	33.25	0.23	2.78	-44.5	46.56	0.3	3.3		-0.193312
		1899-12-31 02:04:59	2.73	-35.38	-0.16	9.21	0.01	-0.26	33.16	0.26	3.7	-43.58	46.32	0.4	3.4		-0.250642
		1899-12-31 02:04:59	2.71	-34.46	-0.16	9.18	0.01	-0.3	33.06	0.3	4.62	-42.66	46.08	0.5	3.5		-0.277694
		1899-12-31 02:04:59	2.7	-33.54	-0.16	9.15	0.01	-0.34	32.95	0.34	5.54	-41.74	45.83	0.6	3.6		-0.304495
		1899-12-31 02:04:59	2.68	-32.63	-0.16	9.12	0.01	-0.38	32.82	0.38	6.45	-40.83	45.58	0.7	3.7		-0.362489
		1899-12-31 02:04:59	2.67	-31.72	-0.16	9.08	0.01	-0.42	32.68	0.42	7.36	-39.92	45.33	0.8	3.8		-0.38877
		1899-12-31 02:04:59	2.65	-30.81	-0.16	9.03	0.01	-0.46	32.53	0.46	8.27	-39.01	45.08	0.9	3.9		-0.414695
		1899-12-31 02:04:59	2.64	-29.91	-0.15	8.99	0.01	-0.5	32.36	0.5	9.17	-38.11	44.83	1	4		-0.472878		32.36	-38.11	1
		1899-12-31 02:05:00	2.62	-29.01	-0.15	8.94	0.01	-0.54	32.17	0.54	10.07	-37.21	44.57	1.1	4.1		-0.525579
		1899-12-31 02:05:00	2.6	-28.12	-0.15	8.88	0.01	-0.59	31.97	0.59	10.96	-36.32	44.31	1.2	4.2		-0.556076
		1899-12-31 02:05:00	2.59	-27.24	-0.15	8.82	0.01	-0.63	31.75	0.63	11.84	-35.44	44.05	1.3	4.3		-0.614583
		1899-12-31 02:05:00	2.57	-26.36	-0.15	8.75	0.01	-0.68	31.52	0.68	12.72	-34.56	43.79	1.4	4.4		-0.637981
		1899-12-31 02:05:00	2.56	-25.49	-0.15	8.69	0.01	-0.73	31.27	0.73	13.59	-33.69	43.53	1.5	4.5		-0.696107
		1899-12-31 02:05:00	2.54	-24.62	-0.15	8.61	0.01	-0.78	31	0.78	14.46	-32.82	43.27	1.6	4.6		-0.74557
		1899-12-31 02:05:00	2.53	-23.77	-0.15	8.53	0.01	-0.83	30.72	0.83	15.31	-31.97	43	1.7	4.7		-0.784386
		1899-12-31 02:05:00	2.52	-22.92	-0.15	8.45	0.02	-0.88	30.41	0.88	16.16	-31.12	42.73	1.8	4.8		-0.860126
		1899-12-31 02:05:00	2.5	-22.08	-0.14	8.36	0.02	-0.94	30.09	0.94	17	-30.28	42.46	1.9	4.9		-0.889183
		1899-12-31 02:05:00	2.49	-21.25	-0.14	8.26	0.02	-1	29.75	1	17.84	-29.44	42.19	2	5		-0.93445
		1899-12-31 02:05:01	2.47	-20.42	-0.14	8.16	0.03	-1.05	29.38	1.05	18.66	-28.62	41.92	2.1	5.1		-1.02934
		1899-12-31 02:05:01	2.46	-19.61	-0.14	8.05	0.03	-1.11	28.99	1.11	19.47	-27.81	41.64	2.2	5.2		-1.08426
		1899-12-31 02:05:01	2.44	-18.81	-0.13	7.94	0.04	-1.16	28.59	1.17	20.27	-27.01	41.36	2.3	5.3		-1.11073
		1899-12-31 02:05:01	2.43	-18.03	-0.13	7.82	0.04	-1.22	28.16	1.22	21.06	-26.22	41.07	2.4	5.4		-1.19171
		1899-12-31 02:05:01	2.42	-17.25	-0.12	7.7	0.05	-1.27	27.72	1.28	21.83	-25.45	40.78	2.5	5.5		-1.23192
		1899-12-31 02:05:01	2.41	-16.49	-0.12	7.57	0.06	-1.33	27.25	1.33	22.59	-24.69	40.48	2.6	5.6		-1.31152
		1899-12-31 02:05:01	2.4	-15.74	-0.11	7.43	0.07	-1.38	26.77	1.38	23.35	-23.93	40.18	2.7	5.7		-1.31628
		1899-12-31 02:05:01	2.38	-15	-0.11	7.29	0.07	-1.43	26.26	1.43	24.08	-23.2	39.87	2.8	5.8		-1.42933
		1899-12-31 02:05:01	2.37	-14.28	-0.1	7.15	0.08	-1.47	25.74	1.48	24.8	-22.48	39.56	2.9	5.9		-1.4489
		1899-12-31 02:05:01	2.36	-13.57	-0.09	7	0.09	-1.52	25.21	1.52	25.51	-21.77	39.24	3	6		-1.46733
		1899-12-31 02:05:02	2.36	-12.88	-0.08	6.85	0.1	-1.56	24.66	1.56	26.2	-21.08	38.91	3.1	6.1		-1.53362
		1899-12-31 02:05:02	2.35	-12.2	-0.07	6.69	0.11	-1.59	24.09	1.59	26.88	-20.4	38.57	3.2	6.2		-1.57654
		1899-12-31 02:05:02	2.34	-11.54	-0.06	6.53	0.11	-1.62	23.52	1.62	27.54	-19.74	38.23	3.3	6.3		-1.58633
		1899-12-31 02:05:02	2.34	-10.89	-0.05	6.37	0.12	-1.64	22.93	1.64	28.19	-19.09	37.87	3.4	6.4		-1.62663
		1899-12-31 02:05:02	2.33	-10.27	-0.04	6.21	0.13	-1.65	22.34	1.65	28.82	-18.46	37.51	3.5	6.5		-1.63564
		1899-12-31 02:05:02	2.33	-9.65	-0.02	6.04	0.13	-1.65	21.75	1.66	29.43	-17.85	37.14	3.6	6.6		-1.64523
		1899-12-31 02:05:02	2.33	-9.06	-0.01	5.88	0.14	-1.65	21.15	1.66	30.02	-17.26	36.75	3.7	6.7		-1.68315
		1899-12-31 02:05:02	2.33	-8.48	0	5.71	0.14	-1.64	20.56	1.65	30.6	-16.68	36.36	3.8	6.8		-1.63693
		1899-12-31 02:05:02	2.33	-7.91	0.02	5.55	0.14	-1.63	19.97	1.63	31.17	-16.11	35.95	3.9	6.9		-1.61852
		1899-12-31 02:05:02	2.33	-7.37	0.03	5.38	0.14	-1.61	19.38	1.61	31.71	-15.57	35.54	4	7		-1.6587
		1899-12-31 02:05:03	2.33	-6.84	0.04	5.22	0.14	-1.58	18.81	1.58	32.24	-15.04	35.11	4.1	7.1		-1.58458
		1899-12-31 02:05:03	2.34	-6.32	0.06	5.07	0.13	-1.54	18.25	1.54	32.76	-14.52	34.67	4.2	7.2		-1.53977
		1899-12-31 02:05:03	2.35	-5.82	0.07	4.92	0.13	-1.5	17.7	1.5	33.26	-14.02	34.21	4.3	7.3		-1.52566
		1899-12-31 02:05:03	2.35	-5.34	0.08	4.77	0.12	-1.45	17.17	1.45	33.74	-13.54	33.74	4.4	7.4		-1.48543
		1899-12-31 02:05:03	2.36	-4.87	0.1	4.62	0.12	-1.4	16.65	1.4	34.21	-13.07	33.26	4.5	7.5		-1.44359
		1899-12-31 02:05:03	2.37	-4.42	0.11	4.49	0.11	-1.34	16.16	1.35	34.67	-12.61	32.76	4.6	7.6		-1.34837
		1899-12-31 02:05:03	2.38	-3.97	0.12	4.35	0.1	-1.29	15.68	1.29	35.11	-12.17	32.24	4.7	7.7		-1.34007
		1899-12-31 02:05:03	2.4	-3.54	0.13	4.23	0.09	-1.23	15.22	1.24	35.54	-11.74	31.71	4.8	7.8		-1.2753
		1899-12-31 02:05:03	2.41	-3.13	0.14	4.11	0.08	-1.18	14.79	1.18	35.95	-11.33	31.17	4.9	7.9		-1.21427
		1899-12-31 02:05:03	2.42	-2.72	0.14	3.99	0.07	-1.12	14.37	1.12	36.36	-10.92	30.6	5	8		-1.15244
		1899-12-31 02:05:04	2.44	-2.33	0.15	3.88	0.05	-1.07	13.98	1.07	36.75	-10.53	30.02	5.1	8.1		-1.09375
		1899-12-31 02:05:04	2.45	-1.95	0.16	3.77	0.04	-1.02	13.6	1.02	37.14	-10.14	29.43	5.2	8.2		-1.03676
		1899-12-31 02:05:04	2.47	-1.57	0.16	3.68	0.03	-0.96	13.24	0.97	37.51	-9.77	28.82	5.3	8.3		-1.00751
		1899-12-31 02:05:04	2.49	-1.21	0.16	3.58	0.01	-0.92	12.9	0.92	37.87	-9.41	28.19	5.4	8.4		-0.952461
		1899-12-31 02:05:04	2.5	-0.86	0.16	3.49	0	-0.87	12.58	0.87	38.23	-9.05	27.54	5.5	8.5		-0.8738
		1899-12-31 02:05:04	2.52	-0.51	0.16	3.4	-0.01	-0.82	12.27	0.82	38.57	-8.71	26.88	5.6	8.6		-0.874126
		1899-12-31 02:05:04	2.53	-0.18	0.16	3.32	-0.03	-0.78	11.98	0.78	38.91	-8.37	26.2	5.7	8.7		-0.797987
		1899-12-31 02:05:04	2.55	0.15	0.16	3.25	-0.04	-0.73	11.71	0.74	39.24	-8.04	25.51	5.8	8.8		-0.74779
		1899-12-31 02:05:04	2.57	0.47	0.15	3.18	-0.05	-0.69	11.45	0.69	39.56	-7.72	24.8	5.9	8.9		-0.725984
		1899-12-31 02:05:04	2.58	0.79	0.15	3.11	-0.07	-0.65	11.2	0.65	39.87	-7.41	24.08	6	9		-0.704712
		1899-12-31 02:05:05	2.6	1.09	0.14	3.05	-0.08	-0.6	10.97	0.6	40.18	-7.1	23.35	6.1	9.1		-0.634595
		1899-12-31 02:05:05	2.61	1.4	0.13	2.99	-0.09	-0.55	10.76	0.56	40.48	-6.8	22.59	6.2	9.2		-0.586844
		1899-12-31 02:05:05	2.62	1.69	0.12	2.93	-0.1	-0.5	10.57	0.51	40.78	-6.5	21.83	6.3	9.3		-0.521181
		1899-12-31 02:05:05	2.63	1.98	0.11	2.88	-0.1	-0.46	10.39	0.47	41.07	-6.21	21.06	6.4	9.4		-0.501916
		1899-12-31 02:05:05	2.64	2.27	0.1	2.84	-0.11	-0.41	10.23	0.42	41.36	-5.92	20.27	6.5	9.5		-0.43891
		1899-12-31 02:05:05	2.65	2.55	0.09	2.8	-0.12	-0.36	10.09	0.38	41.64	-5.64	19.47	6.6	9.6		-0.391975
		1899-12-31 02:05:05	2.66	2.83	0.08	2.77	-0.12	-0.32	9.96	0.34	41.92	-5.36	18.66	6.7	9.7		-0.359141
		1899-12-31 02:05:05	2.67	3.1	0.07	2.74	-0.13	-0.28	9.85	0.31	42.19	-5.09	17.84	6.8	9.8		-0.311371
		1899-12-31 02:05:05	2.68	3.38	0.05	2.71	-0.14	-0.24	9.76	0.28	42.46	-4.82	17	6.9	9.9		-0.252186
		1899-12-31 02:05:05	2.68	3.65	0.04	2.69	-0.15	-0.21	9.67	0.26	42.73	-4.55	16.16	7	10		-0.249871
		1899-12-31 02:05:06	2.68	3.91	0.02	2.67	-0.16	-0.19	9.6	0.24	43	-4.28	15.31	7.1	10.1		-0.192744
		1899-12-31 02:05:06	2.69	4.18	0.01	2.65	-0.16	-0.17	9.53	0.24	43.27	-4.01	14.46	7.2	10.2		-0.191344
		1899-12-31 02:05:06	2.69	4.44	-0.01	2.63	-0.17	-0.17	9.47	0.24	43.53	-3.75	13.59	7.3	10.3		-0.16916
		1899-12-31 02:05:06	2.68	4.71	-0.03	2.61	-0.18	-0.16	9.41	0.24	43.79	-3.49	12.72	7.4	10.4		-0.168091
		1899-12-31 02:05:06	2.68	4.97	-0.04	2.6	-0.19	-0.16	9.35	0.25	44.05	-3.23	11.84	7.5	10.5		-0.167023
		1899-12-31 02:05:06	2.68	5.23	-0.06	2.58	-0.2	-0.17	9.3	0.26	44.31	-2.97	10.96	7.6	10.6		-0.13837
		1899-12-31 02:05:06	2.67	5.48	-0.08	2.56	-0.21	-0.18	9.24	0.27	44.57	-2.71	10.07	7.7	10.7		-0.165064
		1899-12-31 02:05:06	2.66	5.74	-0.1	2.55	-0.21	-0.19	9.17	0.28	44.83	-2.45	9.17	7.8	10.8		-0.191224
		1899-12-31 02:05:06	2.65	5.99	-0.13	2.53	-0.22	-0.19	9.11	0.29	45.08	-2.2	8.27	7.9	10.9		-0.169259
		1899-12-31 02:05:06	2.63	6.24	-0.15	2.51	-0.22	-0.2	9.04	0.3	45.33	-1.95	7.36	8	11		-0.196065
		1899-12-31 02:05:07	2.62	6.49	-0.17	2.49	-0.23	-0.21	8.97	0.31	45.58	-1.7	6.45	8.1	11.1		-0.194552
		1899-12-31 02:05:07	2.6	6.74	-0.19	2.47	-0.23	-0.22	8.9	0.32	45.83	-1.45	5.54	8.2	11.2		-0.19304
		1899-12-31 02:05:07	2.58	6.99	-0.22	2.44	-0.23	-0.23	8.83	0.33	46.08	-1.2	4.62	8.3	11.3		-0.191528
		1899-12-31 02:05:07	2.56	7.23	-0.24	2.42	-0.23	-0.24	8.75	0.33	46.32	-0.96	3.7	8.4	11.4		-0.22608
		1899-12-31 02:05:07	2.53	7.47	-0.26	2.4	-0.23	-0.24	8.68	0.33	46.56	-0.72	2.78	8.5	11.5		-0.196132
		1899-12-31 02:05:07	2.5	7.71	-0.29	2.37	-0.23	-0.24	8.6	0.34	46.8	-0.48	1.85	8.6	11.6		-0.222222
		1899-12-31 02:05:07	2.47	7.95	-0.31	2.35	-0.23	-0.24	8.52	0.34	47.04	-0.24	0.93	8.7	11.7		-0.220165
		1899-12-31 02:05:07	2.44	8.18	-0.33	2.32	-0.23	-0.24	8.45	0.34	47.28	0	0	8.8	11.8		-0.190956
7	1899-12-31 02:08:34	GlobalTime	X[m]	Y[m]	Vx[m/s]	Vy[m/s]	Ax[m/s2]	Ay[m/s2]	Speed[km/h]	Acceleration[m/s2]	Space[m]				3
		1899-12-31 02:08:34	3.4	-37.65	0.19	5.9	-0.04	0.02	21.26	0.04	0	-50.65	50.65	0.02	3.02									21.26	-50.65
		1899-12-31 02:08:34	3.42	-37.06	0.18	5.91	-0.05	0.03	21.27	0.06	0.59	-50.06	50.43	0.12	3.12		0.0278105
		1899-12-31 02:08:34	3.44	-36.47	0.18	5.91	-0.06	0.04	21.28	0.07	1.18	-49.47	50.21	0.22	3.22		0.0278236
		1899-12-31 02:08:35	3.45	-35.88	0.17	5.91	-0.07	0.04	21.3	0.08	1.77	-48.88	49.98	0.32	3.32		0.0556863
		1899-12-31 02:08:35	3.47	-35.29	0.16	5.92	-0.08	0.05	21.31	0.09	2.36	-48.29	49.74	0.42	3.42		0.0278628
		1899-12-31 02:08:35	3.49	-34.7	0.16	5.92	-0.09	0.06	21.33	0.11	2.96	-47.69	49.5	0.52	3.52		0.0548354
		1899-12-31 02:08:35	3.5	-34.1	0.15	5.93	-0.1	0.06	21.35	0.12	3.55	-47.1	49.24	0.62	3.62		0.0558171
		1899-12-31 02:08:35	3.52	-33.51	0.14	5.93	-0.11	0.07	21.37	0.13	4.14	-46.51	48.98	0.72	3.72		0.0558694
		1899-12-31 02:08:35	3.53	-32.92	0.12	5.94	-0.12	0.07	21.39	0.14	4.74	-45.91	48.71	0.82	3.82		0.0549897
		1899-12-31 02:08:35	3.54	-32.32	0.11	5.95	-0.13	0.08	21.42	0.15	5.33	-45.32	48.44	0.92	3.92		0.0839807
		1899-12-31 02:08:35	3.55	-31.73	0.1	5.96	-0.14	0.08	21.45	0.16	5.93	-44.72	48.16	1.02	4.02		0.0826968
		1899-12-31 02:08:35	3.56	-31.13	0.08	5.96	-0.15	0.09	21.48	0.17	6.52	-44.13	47.87	1.12	4.12		0.0842161
		1899-12-31 02:08:35	3.57	-30.53	0.07	5.97	-0.15	0.09	21.51	0.18	7.12	-43.53	47.57	1.22	4.22		0.0829282
		1899-12-31 02:08:36	3.57	-29.94	0.05	5.98	-0.16	0.1	21.54	0.19	7.72	-42.93	47.27	1.32	4.32		0.083044
		1899-12-31 02:08:36	3.58	-29.34	0.04	5.99	-0.16	0.1	21.58	0.19	8.32	-42.33	46.97	1.42	4.42		0.110905
		1899-12-31 02:08:36	3.58	-28.74	0.02	6	-0.16	0.11	21.61	0.19	8.92	-41.73	46.65	1.52	4.52		0.083314
		1899-12-31 02:08:36	3.58	-28.14	0.01	6.01	-0.16	0.11	21.65	0.19	9.52	-41.13	46.34	1.62	4.62		0.111265
		1899-12-31 02:08:36	3.58	-27.53	-0.01	6.03	-0.16	0.11	21.69	0.19	10.12	-40.53	46.01	1.72	4.72		0.111471
		1899-12-31 02:08:36	3.58	-26.93	-0.03	6.04	-0.15	0.1	21.73	0.18	10.72	-39.93	45.68	1.82	4.82		0.111677
		1899-12-31 02:08:36	3.58	-26.33	-0.04	6.05	-0.15	0.09	21.76	0.18	11.33	-39.32	45.35	1.92	4.92		0.0825175
		1899-12-31 02:08:36	3.57	-25.72	-0.06	6.05	-0.14	0.08	21.8	0.17	11.93	-38.72	45.01	2.02	5.02		0.112037
		1899-12-31 02:08:36	3.57	-25.12	-0.07	6.06	-0.14	0.07	21.83	0.15	12.54	-38.11	44.67	2.12	5.12		0.0827831
		1899-12-31 02:08:36	3.56	-24.51	-0.08	6.07	-0.13	0.05	21.85	0.14	13.14	-37.51	44.33	2.22	5.22		0.0561728
		1899-12-31 02:08:37	3.55	-23.9	-0.1	6.07	-0.12	0.03	21.87	0.12	13.75	-36.9	43.97	2.32	5.32		0.0553026
		1899-12-31 02:08:37	3.54	-23.29	-0.11	6.08	-0.11	0.01	21.88	0.11	14.36	-36.29	43.62	2.42	5.42		0.0276703
		1899-12-31 02:08:37	3.53	-22.69	-0.12	6.08	-0.11	-0.02	21.88	0.11	14.97	-35.68	43.26	2.52	5.52		0
		1899-12-31 02:08:37	3.52	-22.08	-0.13	6.07	-0.1	-0.06	21.86	0.11	15.57	-35.08	42.9	2.62	5.62		-0.05625
		1899-12-31 02:08:37	3.5	-21.47	-0.14	6.07	-0.09	-0.09	21.84	0.13	16.18	-34.47	42.53	2.72	5.72		-0.0552773
		1899-12-31 02:08:37	3.49	-20.87	-0.15	6.05	-0.09	-0.13	21.8	0.16	16.79	-33.86	42.16	2.82	5.82		-0.110403
		1899-12-31 02:08:37	3.47	-20.26	-0.16	6.04	-0.08	-0.17	21.75	0.19	17.39	-33.26	41.79	2.92	5.92		-0.140014
		1899-12-31 02:08:37	3.46	-19.66	-0.16	6.02	-0.08	-0.22	21.68	0.23	18	-32.65	41.41	3.02	6.02		-0.192275
		1899-12-31 02:08:37	3.44	-19.06	-0.17	6	-0.08	-0.26	21.6	0.27	18.6	-32.05	41.04	3.12	6.12		-0.222634
		1899-12-31 02:08:37	3.42	-18.46	-0.18	5.97	-0.07	-0.3	21.51	0.31	19.2	-31.45	40.65	3.22	6.22		-0.249479
		1899-12-31 02:08:38	3.4	-17.86	-0.19	5.94	-0.07	-0.34	21.4	0.34	19.79	-30.86	40.27	3.32	6.32		-0.308649
		1899-12-31 02:08:38	3.39	-17.27	-0.19	5.91	-0.07	-0.38	21.27	0.38	20.38	-30.27	39.88	3.42	6.42		-0.362726
		1899-12-31 02:08:38	3.37	-16.68	-0.2	5.87	-0.06	-0.41	21.13	0.42	20.97	-29.68	39.48	3.52	6.52		-0.388157
		1899-12-31 02:08:38	3.35	-16.1	-0.21	5.82	-0.06	-0.44	20.98	0.45	21.56	-29.09	39.08	3.62	6.62		-0.413038
		1899-12-31 02:08:38	3.32	-15.52	-0.21	5.78	-0.05	-0.48	20.82	0.48	22.14	-28.51	38.68	3.72	6.72		-0.44487
		1899-12-31 02:08:38	3.3	-14.94	-0.22	5.73	-0.05	-0.5	20.64	0.51	22.71	-27.94	38.28	3.82	6.82		-0.505117		20.64	-27.94	2.6
		1899-12-31 02:08:38	3.28	-14.37	-0.22	5.68	-0.04	-0.53	20.46	0.53	23.29	-27.36	37.86	3.92	6.92		-0.492098
		1899-12-31 02:08:38	3.26	-13.81	-0.23	5.63	-0.04	-0.55	20.27	0.55	23.85	-26.8	37.45	4.02	7.02		-0.533145
		1899-12-31 02:08:38	3.24	-13.25	-0.23	5.57	-0.03	-0.56	20.07	0.56	24.41	-26.24	37.03	4.12	7.12		-0.555831
		1899-12-31 02:08:38	3.21	-12.69	-0.23	5.51	-0.02	-0.58	19.87	0.58	24.97	-25.68	36.61	4.22	7.22		-0.55032
		1899-12-31 02:08:39	3.19	-12.14	-0.23	5.46	-0.02	-0.58	19.66	0.58	25.52	-25.13	36.18	4.32	7.32		-0.582302
		1899-12-31 02:08:39	3.17	-11.6	-0.24	5.4	-0.01	-0.59	19.45	0.59	26.06	-24.59	35.75	4.42	7.42		-0.586784
		1899-12-31 02:08:39	3.14	-11.07	-0.24	5.34	0	-0.59	19.24	0.59	26.6	-24.05	35.31	4.52	7.52		-0.580483
		1899-12-31 02:08:39	3.12	-10.53	-0.24	5.28	0.01	-0.59	19.02	0.59	27.13	-23.52	34.87	4.62	7.62		-0.612713
		1899-12-31 02:08:39	3.09	-10.01	-0.24	5.22	0.01	-0.59	18.81	0.59	27.65	-23	34.42	4.72	7.72		-0.58941
		1899-12-31 02:08:39	3.07	-9.49	-0.23	5.16	0.01	-0.58	18.6	0.58	28.17	-22.48	33.97	4.82	7.82		-0.582866
		1899-12-31 02:08:39	3.05	-8.98	-0.23	5.1	0.02	-0.58	18.39	0.58	28.69	-21.96	33.52	4.92	7.92		-0.576322
		1899-12-31 02:08:39	3.02	-8.47	-0.23	5.05	0.02	-0.57	18.18	0.57	29.19	-21.46	33.06	5.02	8.02		-0.592569
		1899-12-31 02:08:39	3	-7.97	-0.23	4.99	0.01	-0.57	17.98	0.57	29.7	-20.95	32.59	5.12	8.12		-0.547083
		1899-12-31 02:08:39	2.98	-7.47	-0.23	4.93	0.01	-0.56	17.77	0.56	30.19	-20.46	32.12	5.22	8.22		-0.591104
		1899-12-31 02:08:40	2.96	-6.98	-0.23	4.88	0	-0.55	17.57	0.55	30.68	-19.97	31.65	5.32	8.32		-0.5565
		1899-12-31 02:08:40	2.93	-6.5	-0.23	4.82	-0.01	-0.54	17.38	0.54	31.17	-19.48	31.17	5.42	8.42		-0.522841
		1899-12-31 02:08:40	2.91	-6.02	-0.23	4.77	-0.02	-0.53	17.19	0.53	31.65	-19	30.68	5.52	8.52		-0.52793
		1899-12-31 02:08:40	2.89	-5.54	-0.23	4.72	-0.03	-0.51	17	0.51	32.12	-18.53	30.19	5.62	8.62		-0.533236
		1899-12-31 02:08:40	2.86	-5.07	-0.23	4.67	-0.03	-0.5	16.82	0.5	32.59	-18.06	29.7	5.72	8.72		-0.499704
		1899-12-31 02:08:40	2.84	-4.61	-0.24	4.62	-0.04	-0.49	16.64	0.49	33.06	-17.59	29.19	5.82	8.82		-0.494385
		1899-12-31 02:08:40	2.82	-4.15	-0.24	4.57	-0.05	-0.48	16.47	0.48	33.52	-17.13	28.69	5.92	8.92		-0.47208
		1899-12-31 02:08:40	2.79	-3.7	-0.25	4.52	-0.05	-0.47	16.3	0.47	33.97	-16.68	28.17	6.02	9.02		-0.477615
		1899-12-31 02:08:40	2.77	-3.25	-0.25	4.47	-0.05	-0.46	16.13	0.46	34.42	-16.23	27.65	6.12	9.12		-0.472659
		1899-12-31 02:08:40	2.74	-2.8	-0.26	4.43	-0.05	-0.45	15.97	0.46	34.87	-15.78	27.13	6.22	9.22		-0.440329
		1899-12-31 02:08:41	2.72	-2.36	-0.26	4.38	-0.05	-0.45	15.81	0.45	35.31	-15.34	26.6	6.32	9.32		-0.445847
		1899-12-31 02:08:41	2.69	-1.93	-0.27	4.34	-0.05	-0.45	15.64	0.45	35.75	-14.9	26.06	6.42	9.42		-0.468794
		1899-12-31 02:08:41	2.66	-1.49	-0.27	4.29	-0.04	-0.45	15.49	0.45	36.18	-14.47	25.52	6.52	9.52		-0.418955
		1899-12-31 02:08:41	2.63	-1.07	-0.28	4.25	-0.04	-0.44	15.33	0.45	36.61	-14.04	24.97	6.62	9.62		-0.442435
		1899-12-31 02:08:41	2.61	-0.64	-0.28	4.2	-0.03	-0.44	15.17	0.44	37.03	-13.62	24.41	6.72	9.72		-0.448266
		1899-12-31 02:08:41	2.58	-0.23	-0.28	4.16	-0.03	-0.44	15.01	0.44	37.45	-13.2	23.85	6.82	9.82		-0.443563
		1899-12-31 02:08:41	2.55	0.19	-0.29	4.12	-0.02	-0.44	14.85	0.44	37.86	-12.79	23.29	6.92	9.92		-0.449563
		1899-12-31 02:08:41	2.52	0.6	-0.29	4.07	-0.02	-0.43	14.7	0.43	38.28	-12.37	22.71	7.02	10.02		-0.407159
		1899-12-31 02:08:41	2.49	1	-0.29	4.03	-0.02	-0.42	14.55	0.42	38.68	-11.97	22.14	7.12	10.12		-0.423177
		1899-12-31 02:08:41	2.46	1.4	-0.29	3.99	-0.02	-0.41	14.4	0.41	39.08	-11.57	21.56	7.22	10.22		-0.418837
		1899-12-31 02:08:42	2.43	1.8	-0.29	3.95	-0.02	-0.39	14.25	0.39	39.48	-11.17	20.97	7.32	10.32		-0.414497
		1899-12-31 02:08:42	2.4	2.19	-0.3	3.91	-0.03	-0.38	14.12	0.38	39.88	-10.77	20.38	7.42	10.42		-0.35572
		1899-12-31 02:08:42	2.37	2.58	-0.3	3.87	-0.03	-0.36	13.98	0.37	40.27	-10.38	19.79	7.52	10.52		-0.389166
		1899-12-31 02:08:42	2.34	2.97	-0.3	3.84	-0.03	-0.35	13.85	0.36	40.65	-10	19.2	7.62	10.62		-0.367314
		1899-12-31 02:08:42	2.31	3.35	-0.31	3.8	-0.04	-0.35	13.73	0.35	41.04	-9.61	18.6	7.72	10.72		-0.327398
		1899-12-31 02:08:42	2.28	3.73	-0.31	3.77	-0.05	-0.34	13.61	0.35	41.41	-9.24	18	7.82	10.82		-0.342092
		1899-12-31 02:08:42	2.25	4.1	-0.31	3.73	-0.05	-0.35	13.48	0.35	41.79	-8.86	17.39	7.92	10.92		-0.357548
		1899-12-31 02:08:42	2.22	4.47	-0.32	3.7	-0.06	-0.35	13.36	0.36	42.16	-8.49	16.79	8.02	11.02		-0.335836
		1899-12-31 02:08:42	2.19	4.84	-0.33	3.66	-0.06	-0.36	13.24	0.37	42.53	-8.12	16.18	8.12	11.12		-0.332833
		1899-12-31 02:08:42	2.16	5.21	-0.33	3.63	-0.06	-0.37	13.11	0.38	42.9	-7.75	15.57	8.22	11.22		-0.35718
		1899-12-31 02:08:43	2.12	5.57	-0.34	3.59	-0.06	-0.39	12.97	0.39	43.26	-7.39	14.97	8.32	11.32		-0.391289
		1899-12-31 02:08:43	2.09	5.92	-0.34	3.55	-0.06	-0.4	12.84	0.4	43.62	-7.03	14.36	8.42	11.42		-0.359579
		1899-12-31 02:08:43	2.05	6.28	-0.35	3.51	-0.06	-0.41	12.69	0.42	43.97	-6.68	13.75	8.52	11.52		-0.422123
		1899-12-31 02:08:43	2.02	6.63	-0.35	3.47	-0.05	-0.43	12.55	0.43	44.33	-6.32	13.14	8.62	11.62		-0.378687
		1899-12-31 02:08:43	1.98	6.97	-0.36	3.42	-0.05	-0.44	12.39	0.44	44.67	-5.98	12.54	8.72	11.72		-0.452796
		1899-12-31 02:08:43	1.95	7.31	-0.36	3.38	-0.04	-0.46	12.24	0.46	45.01	-5.64	11.93	8.82	11.82		-0.41922
		1899-12-31 02:08:43	1.91	7.65	-0.37	3.33	-0.04	-0.47	12.07	0.47	45.35	-5.3	11.33	8.92	11.92		-0.468943
		1899-12-31 02:08:43	1.87	7.98	-0.37	3.29	-0.03	-0.49	11.9	0.49	45.68	-4.97	10.72	9.02	12.02		-0.476396
		1899-12-31 02:08:43	1.84	8.3	-0.38	3.24	-0.02	-0.51	11.73	0.51	46.01	-4.64	10.12	9.12	12.12		-0.469639
		1899-12-31 02:08:43	1.8	8.62	-0.38	3.18	-0.02	-0.53	11.54	0.53	46.34	-4.31	9.52	9.22	12.22		-0.516893
		1899-12-31 02:08:44	1.76	8.94	-0.38	3.13	-0.01	-0.55	11.35	0.55	46.65	-4	8.92	9.32	12.32		-0.541256
		1899-12-31 02:08:44	1.72	9.25	-0.38	3.07	-0.01	-0.58	11.15	0.58	46.97	-3.68	8.32	9.42	12.42		-0.542535
		1899-12-31 02:08:44	1.68	9.56	-0.38	3.02	0	-0.6	10.94	0.6	47.27	-3.38	7.72	9.52	12.52		-0.596566
		1899-12-31 02:08:44	1.65	9.85	-0.38	2.96	0	-0.63	10.73	0.63	47.57	-3.08	7.12	9.62	12.62		-0.585224
		1899-12-31 02:08:44	1.61	10.15	-0.38	2.89	0.01	-0.65	10.5	0.65	47.87	-2.78	6.52	9.72	12.72		-0.627945
		1899-12-31 02:08:44	1.57	10.43	-0.38	2.83	0.01	-0.68	10.26	0.68	48.16	-2.49	5.93	9.82	12.82		-0.662835
		1899-12-31 02:08:44	1.53	10.71	-0.38	2.76	0.01	-0.7	10.02	0.7	48.44	-2.21	5.33	9.92	12.92		-0.670635
		1899-12-31 02:08:44	1.49	10.98	-0.38	2.69	0.01	-0.72	9.77	0.72	48.71	-1.94	4.74	10.02	13.02		-0.706947
		1899-12-31 02:08:44	1.46	11.25	-0.38	2.61	0.01	-0.73	9.51	0.73	48.98	-1.67	4.14	10.12	13.12		-0.716278
		1899-12-31 02:08:44	1.42	11.51	-0.37	2.54	0.01	-0.74	9.25	0.74	49.24	-1.41	3.55	10.22	13.22		-0.723765
		1899-12-31 02:08:45	1.38	11.76	-0.37	2.47	0.01	-0.75	8.98	0.75	49.5	-1.15	2.96	10.32	13.32		-0.730369
		1899-12-31 02:08:45	1.35	12	-0.37	2.39	0.01	-0.75	8.71	0.75	49.74	-0.91	2.36	10.42	13.42		-0.767795
		1899-12-31 02:08:45	1.31	12.23	-0.37	2.32	0.01	-0.76	8.44	0.76	49.98	-0.67	1.77	10.52	13.52		-0.744358
		1899-12-31 02:08:45	1.27	12.46	-0.37	2.24	0.01	-0.76	8.17	0.76	50.21	-0.44	1.18	10.62	13.62		-0.752264
		1899-12-31 02:08:45	1.23	12.68	-0.37	2.16	0.01	-0.76	7.9	0.76	50.43	-0.22	0.59	10.72	13.72		-0.76089
		1899-12-31 02:08:45	1.2	12.9	-0.37	2.09	0.01	-0.76	7.64	0.76	50.65	0	0	10.82	13.82		-0.708544
8	1899-12-31 02:08:34	GlobalTime	X[m]	Y[m]	Vx[m/s]	Vy[m/s]	Ax[m/s2]	Ay[m/s2]	Speed[km/h]	Acceleration[m/s2]	Space[m]				3
		1899-12-31 02:08:34	1.2	-36.89	-0.04	4.74	0	-0.05	17.07	0.05	0	-41.45	41.45	0.29	3.29									17.07	-41.45
		1899-12-31 02:08:35	1.19	-36.42	-0.04	4.74	0	-0.06	17.05	0.06	0.47	-40.98	41.28	0.39	3.39		-0.0560152
		1899-12-31 02:08:35	1.19	-35.94	-0.04	4.73	0	-0.07	17.03	0.07	0.95	-40.5	41.11	0.49	3.49		-0.054784
		1899-12-31 02:08:35	1.18	-35.47	-0.04	4.72	0	-0.08	17	0.08	1.42	-40.03	40.94	0.59	3.59		-0.0838012
		1899-12-31 02:08:35	1.18	-35	-0.04	4.71	0	-0.09	16.97	0.09	1.89	-39.56	40.75	0.69	3.69		-0.0836535
		1899-12-31 02:08:35	1.17	-34.53	-0.04	4.7	0	-0.1	16.94	0.1	2.36	-39.09	40.56	0.79	3.79		-0.0835057
		1899-12-31 02:08:35	1.17	-34.06	-0.04	4.69	0	-0.11	16.9	0.11	2.83	-38.62	40.36	0.89	3.89		-0.111111
		1899-12-31 02:08:35	1.17	-33.59	-0.04	4.68	0	-0.12	16.86	0.12	3.3	-38.15	40.16	0.99	3.99		-0.110848
		1899-12-31 02:08:35	1.16	-33.12	-0.04	4.67	0	-0.12	16.81	0.12	3.77	-37.68	39.95	1.09	4.09		-0.138191
		1899-12-31 02:08:35	1.16	-32.65	-0.04	4.66	0.01	-0.13	16.77	0.13	4.24	-37.21	39.73	1.19	4.19		-0.110257
		1899-12-31 02:08:35	1.15	-32.19	-0.04	4.64	0.01	-0.13	16.72	0.13	4.7	-36.75	39.51	1.29	4.29		-0.14044
		1899-12-31 02:08:36	1.15	-31.73	-0.04	4.63	0.01	-0.14	16.67	0.14	5.16	-36.29	39.28	1.39	4.39		-0.140021
		1899-12-31 02:08:36	1.15	-31.26	-0.04	4.62	0.01	-0.14	16.62	0.14	5.63	-35.82	39.05	1.49	4.49		-0.136632
		1899-12-31 02:08:36	1.14	-30.8	-0.04	4.6	0.01	-0.14	16.57	0.14	6.09	-35.36	38.81	1.59	4.59		-0.139182
		1899-12-31 02:08:36	1.14	-30.34	-0.04	4.59	0.01	-0.15	16.52	0.15	6.55	-34.9	38.56	1.69	4.69		-0.138763
		1899-12-31 02:08:36	1.13	-29.88	-0.04	4.57	0.01	-0.15	16.47	0.15	7.01	-34.44	38.31	1.79	4.79		-0.138344
		1899-12-31 02:08:36	1.13	-29.43	-0.03	4.56	0.01	-0.15	16.41	0.15	7.46	-33.99	38.05	1.89	4.89		-0.169136
		1899-12-31 02:08:36	1.13	-28.97	-0.03	4.54	0.01	-0.16	16.36	0.16	7.92	-33.53	37.78	1.99	4.99		-0.137421
		1899-12-31 02:08:36	1.12	-28.52	-0.03	4.53	0.01	-0.16	16.3	0.16	8.37	-33.08	37.51	2.09	5.09		-0.168004
		1899-12-31 02:08:36	1.12	-28.07	-0.03	4.51	0	-0.17	16.24	0.17	8.82	-32.63	37.24	2.19	5.19		-0.167387
		1899-12-31 02:08:36	1.12	-27.62	-0.03	4.49	0	-0.18	16.18	0.18	9.27	-32.18	36.96	2.29	5.29		-0.16677
		1899-12-31 02:08:37	1.11	-27.17	-0.03	4.48	0	-0.19	16.11	0.19	9.72	-31.73	36.67	2.39	5.39		-0.193784
		1899-12-31 02:08:37	1.11	-26.72	-0.03	4.46	0	-0.2	16.04	0.2	10.17	-31.28	36.38	2.49	5.49		-0.192944
		1899-12-31 02:08:37	1.11	-26.28	-0.03	4.44	-0.01	-0.21	15.97	0.21	10.61	-30.84	36.09	2.59	5.59		-0.19647
		1899-12-31 02:08:37	1.1	-25.84	-0.03	4.41	-0.01	-0.22	15.89	0.22	11.05	-30.4	35.8	2.69	5.69		-0.223485
		1899-12-31 02:08:37	1.1	-25.39	-0.03	4.39	-0.01	-0.23	15.81	0.23	11.5	-29.95	35.5	2.79	5.79		-0.217421
		1899-12-31 02:08:37	1.1	-24.96	-0.03	4.37	-0.01	-0.24	15.73	0.24	11.93	-29.52	35.2	2.89	5.89		-0.226385
		1899-12-31 02:08:37	1.09	-24.52	-0.04	4.34	-0.01	-0.25	15.64	0.25	12.37	-29.08	34.89	2.99	5.99		-0.247554
		1899-12-31 02:08:37	1.09	-24.09	-0.04	4.32	-0.01	-0.26	15.55	0.26	12.8	-28.65	34.59	3.09	6.09		-0.251857
		1899-12-31 02:08:37	1.09	-23.66	-0.04	4.29	-0.01	-0.26	15.45	0.26	13.23	-28.22	34.28	3.19	6.19		-0.278137
		1899-12-31 02:08:37	1.08	-23.23	-0.04	4.27	-0.01	-0.27	15.36	0.27	13.66	-27.79	33.97	3.29	6.29		-0.248789
		1899-12-31 02:08:38	1.08	-22.8	-0.04	4.24	-0.01	-0.27	15.26	0.28	14.09	-27.36	33.67	3.39	6.39		-0.274727
		1899-12-31 02:08:38	1.07	-22.38	-0.04	4.21	-0.01	-0.28	15.16	0.28	14.51	-26.94	33.36	3.49	6.49		-0.279431
		1899-12-31 02:08:38	1.07	-21.96	-0.04	4.18	-0.01	-0.29	15.06	0.29	14.93	-26.52	33.05	3.59	6.59		-0.277594		15.06	-26.52	0.4
		1899-12-31 02:08:38	1.07	-21.55	-0.05	4.15	-0.01	-0.29	14.96	0.29	15.34	-26.11	32.74	3.69	6.69		-0.282483
		1899-12-31 02:08:38	1.06	-21.13	-0.05	4.13	-0.01	-0.3	14.85	0.3	15.76	-25.69	32.42	3.79	6.79		-0.301211
		1899-12-31 02:08:38	1.06	-20.72	-0.05	4.1	-0.01	-0.3	14.74	0.3	16.17	-25.28	32.11	3.89	6.89		-0.30628
		1899-12-31 02:08:38	1.05	-20.31	-0.05	4.06	0	-0.31	14.63	0.31	16.58	-24.87	31.8	3.99	6.99		-0.304003
		1899-12-31 02:08:38	1.05	-19.91	-0.05	4.03	0	-0.32	14.52	0.32	16.98	-24.47	31.49	4.09	7.09		-0.309269
		1899-12-31 02:08:38	1.04	-19.51	-0.05	4	0	-0.32	14.41	0.32	17.38	-24.07	31.18	4.19	7.19		-0.306935
		1899-12-31 02:08:38	1.04	-19.11	-0.05	3.97	0	-0.33	14.29	0.33	17.78	-23.67	30.86	4.29	7.29		-0.332176
		1899-12-31 02:08:39	1.03	-18.71	-0.05	3.94	0	-0.34	14.17	0.34	18.18	-23.27	30.55	4.39	7.39		-0.329398
		1899-12-31 02:08:39	1.03	-18.32	-0.05	3.9	0	-0.35	14.05	0.35	18.57	-22.88	30.23	4.49	7.49		-0.334995
		1899-12-31 02:08:39	1.02	-17.93	-0.05	3.87	-0.01	-0.35	13.92	0.35	18.96	-22.49	29.92	4.59	7.59		-0.359697
		1899-12-31 02:08:39	1.02	-17.55	-0.05	3.83	-0.01	-0.36	13.79	0.36	19.34	-22.11	29.6	4.69	7.69		-0.365731
		1899-12-31 02:08:39	1.01	-17.17	-0.05	3.8	-0.01	-0.36	13.67	0.36	19.73	-21.72	29.28	4.79	7.79		-0.325973
		1899-12-31 02:08:39	1.01	-16.79	-0.05	3.76	-0.01	-0.36	13.54	0.36	20.1	-21.35	28.97	4.89	7.89		-0.368838
		1899-12-31 02:08:39	1	-16.41	-0.05	3.72	-0.02	-0.36	13.41	0.36	20.48	-20.97	28.65	4.99	7.99		-0.3557
		1899-12-31 02:08:39	1	-16.04	-0.05	3.69	-0.02	-0.35	13.28	0.35	20.85	-20.6	28.33	5.09	8.09		-0.361789
		1899-12-31 02:08:39	0.99	-15.68	-0.06	3.65	-0.02	-0.34	13.15	0.35	21.22	-20.23	28	5.19	8.19		-0.358265
		1899-12-31 02:08:39	0.99	-15.31	-0.06	3.62	-0.02	-0.34	13.03	0.34	21.58	-19.87	27.68	5.29	8.29		-0.336677
		1899-12-31 02:08:40	0.98	-14.95	-0.06	3.59	-0.02	-0.33	12.91	0.33	21.94	-19.51	27.36	5.39	8.39		-0.333591
		1899-12-31 02:08:40	0.97	-14.59	-0.06	3.55	-0.02	-0.32	12.8	0.32	22.3	-19.15	27.03	5.49	8.49		-0.30308
		1899-12-31 02:08:40	0.97	-14.24	-0.06	3.52	-0.02	-0.3	12.68	0.3	22.65	-18.8	26.71	5.59	8.59		-0.337037
		1899-12-31 02:08:40	0.96	-13.89	-0.07	3.49	-0.02	-0.29	12.58	0.29	23	-18.45	26.38	5.69	8.69		-0.278439
		1899-12-31 02:08:40	0.95	-13.54	-0.07	3.46	-0.01	-0.27	12.48	0.27	23.35	-18.1	26.05	5.79	8.79		-0.276235
		1899-12-31 02:08:40	0.95	-13.2	-0.07	3.44	-0.01	-0.25	12.38	0.25	23.69	-17.76	25.72	5.89	8.89		-0.28209
		1899-12-31 02:08:40	0.94	-12.85	-0.07	3.41	-0.01	-0.24	12.29	0.24	24.04	-17.41	25.38	5.99	8.99		-0.244742
		1899-12-31 02:08:40	0.93	-12.51	-0.07	3.39	-0.01	-0.22	12.21	0.22	24.38	-17.07	25.05	6.09	9.09		-0.222404
		1899-12-31 02:08:40	0.93	-12.18	-0.07	3.37	-0.01	-0.2	12.13	0.2	24.71	-16.74	24.71	6.19	9.19		-0.227647
		1899-12-31 02:08:40	0.92	-11.84	-0.07	3.35	0	-0.19	12.06	0.19	25.05	-16.4	24.38	6.29	9.29		-0.192141
		1899-12-31 02:08:41	0.91	-11.51	-0.07	3.33	0	-0.17	12	0.17	25.38	-16.07	24.04	6.39	9.39		-0.168771
		1899-12-31 02:08:41	0.9	-11.17	-0.07	3.31	0	-0.16	11.94	0.16	25.72	-15.73	23.69	6.49	9.49		-0.16299
		1899-12-31 02:08:41	0.9	-10.84	-0.07	3.3	0	-0.15	11.88	0.15	26.05	-15.4	23.35	6.59	9.59		-0.167088
		1899-12-31 02:08:41	0.89	-10.51	-0.07	3.28	0	-0.14	11.83	0.14	26.38	-15.07	23	6.69	9.69		-0.138597
		1899-12-31 02:08:41	0.88	-10.19	-0.07	3.27	0	-0.13	11.78	0.13	26.71	-14.74	22.65	6.79	9.79		-0.138012
		1899-12-31 02:08:41	0.88	-9.86	-0.07	3.26	0	-0.13	11.73	0.13	27.03	-14.42	22.3	6.89	9.89		-0.141722
		1899-12-31 02:08:41	0.87	-9.54	-0.07	3.24	0	-0.12	11.68	0.12	27.36	-14.09	21.94	6.99	9.99		-0.136843
		1899-12-31 02:08:41	0.86	-9.21	-0.07	3.23	0.01	-0.12	11.64	0.12	27.68	-13.77	21.58	7.09	10.09		-0.112461
		1899-12-31 02:08:41	0.85	-8.89	-0.07	3.22	0.01	-0.11	11.6	0.11	28	-13.45	21.22	7.19	10.19		-0.112076
		1899-12-31 02:08:41	0.85	-8.57	-0.07	3.21	0.01	-0.11	11.56	0.11	28.33	-13.12	20.85	7.29	10.29		-0.108305
		1899-12-31 02:08:42	0.84	-8.25	-0.07	3.2	0.01	-0.1	11.52	0.1	28.65	-12.8	20.48	7.39	10.39		-0.111304
		1899-12-31 02:08:42	0.83	-7.93	-0.07	3.19	0.01	-0.1	11.48	0.1	28.97	-12.48	20.1	7.49	10.49		-0.110918
		1899-12-31 02:08:42	0.83	-7.61	-0.07	3.18	0.01	-0.09	11.45	0.09	29.28	-12.17	19.73	7.59	10.59		-0.0856108
		1899-12-31 02:08:42	0.82	-7.29	-0.06	3.17	0.01	-0.09	11.41	0.09	29.6	-11.85	19.34	7.69	10.69		-0.110243
		1899-12-31 02:08:42	0.81	-6.97	-0.06	3.16	0.01	-0.08	11.38	0.08	29.92	-11.53	18.96	7.79	10.79		-0.0824291
		1899-12-31 02:08:42	0.81	-6.66	-0.06	3.15	0.01	-0.08	11.35	0.08	30.23	-11.22	18.57	7.89	10.89		-0.0848641
		1899-12-31 02:08:42	0.8	-6.34	-0.06	3.15	0.01	-0.07	11.33	0.07	30.55	-10.9	18.18	7.99	10.99		-0.0546875
		1899-12-31 02:08:42	0.8	-6.03	-0.06	3.14	0.01	-0.07	11.3	0.07	30.86	-10.59	17.78	8.09	11.09		-0.0844907
		1899-12-31 02:08:42	0.79	-5.72	-0.06	3.13	0.01	-0.06	11.28	0.06	31.18	-10.27	17.38	8.19	11.19		-0.0544464
		1899-12-31 02:08:42	0.78	-5.4	-0.06	3.13	0	-0.06	11.25	0.06	31.49	-9.96	16.98	8.29	11.29		-0.0841174
		1899-12-31 02:08:43	0.78	-5.09	-0.06	3.12	0	-0.05	11.23	0.05	31.8	-9.65	16.58	8.39	11.39		-0.0559538
		1899-12-31 02:08:43	0.77	-4.78	-0.06	3.11	0	-0.05	11.21	0.05	32.11	-9.34	16.17	8.49	11.49		-0.0558542
		1899-12-31 02:08:43	0.77	-4.47	-0.06	3.11	-0.01	-0.04	11.2	0.04	32.42	-9.03	15.76	8.59	11.59		-0.0278898
		1899-12-31 02:08:43	0.76	-4.16	-0.06	3.11	-0.01	-0.04	11.18	0.04	32.74	-8.71	15.34	8.69	11.69		-0.0539641
		1899-12-31 02:08:43	0.75	-3.85	-0.06	3.1	-0.01	-0.05	11.17	0.05	33.05	-8.4	14.93	8.79	11.79		-0.0278151
		1899-12-31 02:08:43	0.75	-3.54	-0.06	3.1	-0.01	-0.06	11.15	0.06	33.36	-8.09	14.51	8.89	11.89		-0.0555556
		1899-12-31 02:08:43	0.74	-3.23	-0.06	3.09	-0.01	-0.07	11.13	0.07	33.67	-7.78	14.09	8.99	11.99		-0.055456
		1899-12-31 02:08:43	0.74	-2.92	-0.06	3.08	-0.02	-0.09	11.1	0.09	33.97	-7.48	13.66	9.09	12.09		-0.0857639
		1899-12-31 02:08:43	0.73	-2.61	-0.07	3.07	-0.02	-0.12	11.06	0.12	34.28	-7.17	13.23	9.19	12.19		-0.110315
		1899-12-31 02:08:43	0.72	-2.31	-0.07	3.06	-0.02	-0.15	11.02	0.15	34.59	-6.86	12.8	9.29	12.29		-0.109916
		1899-12-31 02:08:44	0.72	-2	-0.07	3.04	-0.02	-0.19	10.96	0.19	34.89	-6.56	12.37	9.39	12.39		-0.169599
		1899-12-31 02:08:44	0.71	-1.7	-0.07	3.02	-0.02	-0.22	10.89	0.23	35.2	-6.25	11.93	9.49	12.49		-0.19035
		1899-12-31 02:08:44	0.7	-1.4	-0.07	3	-0.02	-0.26	10.8	0.26	35.5	-5.95	11.5	9.59	12.59		-0.251042
		1899-12-31 02:08:44	0.69	-1.1	-0.08	2.97	-0.02	-0.3	10.7	0.3	35.8	-5.65	11.05	9.69	12.69		-0.276492
		1899-12-31 02:08:44	0.69	-0.8	-0.08	2.94	-0.02	-0.34	10.59	0.34	36.09	-5.36	10.61	9.79	12.79		-0.311555
		1899-12-31 02:08:44	0.68	-0.51	-0.08	2.9	-0.02	-0.38	10.46	0.38	36.38	-5.07	10.17	9.89	12.89		-0.364051
		1899-12-31 02:08:44	0.67	-0.22	-0.08	2.87	-0.03	-0.42	10.32	0.42	36.67	-4.78	9.72	9.99	12.99		-0.387026
		1899-12-31 02:08:44	0.66	0.06	-0.08	2.82	-0.03	-0.46	10.16	0.46	36.96	-4.49	9.27	10.09	13.09		-0.43593
		1899-12-31 02:08:44	0.65	0.34	-0.09	2.78	-0.03	-0.49	10	0.49	37.24	-4.21	8.82	10.19	13.19		-0.444444
		1899-12-31 02:08:44	0.64	0.62	-0.09	2.73	-0.03	-0.52	9.82	0.52	37.51	-3.94	8.37	10.29	13.29		-0.509774
		1899-12-31 02:08:45	0.64	0.89	-0.09	2.67	-0.04	-0.55	9.63	0.55	37.78	-3.67	7.92	10.39	13.39		-0.528049
		1899-12-31 02:08:45	0.63	1.15	-0.1	2.62	-0.04	-0.57	9.43	0.57	38.05	-3.4	7.46	10.49	13.49		-0.544696
		1899-12-31 02:08:45	0.62	1.41	-0.1	2.56	-0.04	-0.59	9.22	0.59	38.31	-3.14	7.01	10.59	13.59		-0.581152
		1899-12-31 02:08:45	0.61	1.66	-0.11	2.5	-0.05	-0.61	9	0.61	38.56	-2.89	6.55	10.69	13.69		-0.61858
		1899-12-31 02:08:45	0.59	1.91	-0.11	2.44	-0.05	-0.62	8.78	0.62	38.81	-2.64	6.09	10.79	13.79		-0.603642
		1899-12-31 02:08:45	0.58	2.15	-0.12	2.38	-0.05	-0.62	8.56	0.63	39.05	-2.4	5.63	10.89	13.89		-0.613233
		1899-12-31 02:08:45	0.57	2.39	-0.12	2.31	-0.05	-0.63	8.34	0.63	39.28	-2.17	5.16	10.99	13.99		-0.623658
		1899-12-31 02:08:45	0.56	2.61	-0.13	2.25	-0.06	-0.63	8.11	0.63	39.51	-1.94	4.7	11.09	14.09		-0.634645
		1899-12-31 02:08:45	0.55	2.84	-0.13	2.19	-0.06	-0.63	7.89	0.63	39.73	-1.72	4.24	11.19	14.19		-0.617284
		1899-12-31 02:08:45	0.53	3.05	-0.14	2.12	-0.06	-0.63	7.66	0.64	39.95	-1.5	3.77	11.29	14.29		-0.627192
		1899-12-31 02:08:46	0.52	3.26	-0.14	2.06	-0.06	-0.64	7.44	0.64	40.16	-1.29	3.3	11.39	14.39		-0.610303
		1899-12-31 02:08:46	0.5	3.46	-0.15	2	-0.06	-0.64	7.21	0.64	40.36	-1.09	2.83	11.49	14.49		-0.649981
		1899-12-31 02:08:46	0.49	3.66	-0.16	1.93	-0.06	-0.64	6.98	0.64	40.56	-0.89	2.36	11.59	14.59		-0.629572
		1899-12-31 02:08:46	0.47	3.85	-0.16	1.87	-0.06	-0.64	6.75	0.64	40.75	-0.7	1.89	11.69	14.69		-0.641224
		1899-12-31 02:08:46	0.46	4.03	-0.17	1.8	-0.06	-0.64	6.53	0.65	40.94	-0.51	1.42	11.79	14.79		-0.593242
		1899-12-31 02:08:46	0.44	4.21	-0.18	1.74	-0.06	-0.64	6.3	0.65	41.11	-0.34	0.95	11.89	14.89		-0.669685
		1899-12-31 02:08:46	0.42	4.38	-0.18	1.68	-0.06	-0.64	6.07	0.65	41.28	-0.17	0.47	11.99	14.99		-0.645674
		1899-12-31 02:08:46	0.4	4.55	-0.19	1.61	-0.06	-0.64	5.84	0.65	41.45	0	0	12.09	15.09		-0.621664
9	1899-12-31 02:22:17	GlobalTime	X[m]	Y[m]	Vx[m/s]	Vy[m/s]	Ax[m/s2]	Ay[m/s2]	Speed[km/h]	Acceleration[m/s2]	Space[m]				3
		1899-12-31 02:22:18	2.65	-38.91	0.24	7.94	-0.03	-0.1	28.62	0.1	0	-39.79	39.79	1.12	4.12									28.62	-39.79
		1899-12-31 02:22:18	2.67	-38.12	0.24	7.93	-0.04	-0.13	28.58	0.13	0.79	-39	39.33	1.22	4.22		-0.111736
		1899-12-31 02:22:19	2.7	-37.32	0.24	7.92	-0.05	-0.16	28.53	0.16	1.59	-38.2	38.87	1.32	4.32		-0.137707
		1899-12-31 02:22:19	2.72	-36.53	0.23	7.9	-0.05	-0.19	28.46	0.19	2.38	-37.41	38.42	1.42	4.42		-0.19482
		1899-12-31 02:22:19	2.74	-35.74	0.23	7.88	-0.06	-0.21	28.39	0.22	3.17	-36.62	37.96	1.52	4.52		-0.194342
		1899-12-31 02:22:19	2.77	-34.95	0.22	7.86	-0.07	-0.24	28.31	0.25	3.96	-35.83	37.51	1.62	4.62		-0.221519
		1899-12-31 02:22:19	2.79	-34.17	0.21	7.84	-0.08	-0.27	28.22	0.28	4.74	-35.05	37.06	1.72	4.72		-0.251647
		1899-12-31 02:22:19	2.81	-33.39	0.2	7.81	-0.09	-0.3	28.12	0.31	5.52	-34.27	36.61	1.82	4.82		-0.278668
		1899-12-31 02:22:19	2.83	-32.61	0.2	7.78	-0.09	-0.32	28.01	0.34	6.3	-33.49	36.16	1.92	4.92		-0.305392
		1899-12-31 02:22:19	2.85	-31.83	0.19	7.75	-0.1	-0.35	27.89	0.37	7.08	-32.71	35.72	2.02	5.02		-0.33179
		1899-12-31 02:22:19	2.86	-31.06	0.18	7.71	-0.11	-0.39	27.76	0.4	7.85	-31.94	35.27	2.12	5.12		-0.362479
		1899-12-31 02:22:19	2.88	-30.29	0.16	7.67	-0.11	-0.42	27.61	0.44	8.62	-31.17	34.83	2.22	5.22		-0.416141
		1899-12-31 02:22:20	2.9	-29.53	0.15	7.63	-0.12	-0.46	27.46	0.48	9.39	-30.4	34.39	2.32	5.32		-0.413886		27.46	-30.4	1.1
		1899-12-31 02:22:20	2.91	-28.77	0.14	7.58	-0.12	-0.51	27.28	0.52	10.15	-29.64	33.94	2.42	5.42		-0.500183
		1899-12-31 02:22:20	2.93	-28.01	0.13	7.52	-0.13	-0.56	27.09	0.57	10.9	-28.89	33.5	2.52	5.52		-0.531394
		1899-12-31 02:22:20	2.94	-27.26	0.12	7.47	-0.13	-0.61	26.88	0.63	11.65	-28.14	33.07	2.62	5.62		-0.583009
		1899-12-31 02:22:20	2.95	-26.52	0.1	7.4	-0.14	-0.67	26.66	0.68	12.4	-27.39	32.63	2.72	5.72		-0.605905
		1899-12-31 02:22:20	2.96	-25.78	0.09	7.34	-0.14	-0.73	26.41	0.74	13.13	-26.66	32.19	2.82	5.82		-0.701183
		1899-12-31 02:22:20	2.97	-25.05	0.07	7.26	-0.15	-0.79	26.14	0.8	13.86	-25.93	31.75	2.92	5.92		-0.749857
		1899-12-31 02:22:20	2.97	-24.33	0.06	7.18	-0.15	-0.85	25.85	0.87	14.58	-25.21	31.31	3.02	6.02		-0.807886
		1899-12-31 02:22:20	2.98	-23.61	0.04	7.09	-0.16	-0.92	25.53	0.93	15.3	-24.49	30.86	3.12	6.12		-0.881001
		1899-12-31 02:22:20	2.98	-22.91	0.03	7	-0.16	-0.98	25.19	0.99	16	-23.79	30.42	3.22	6.22		-0.950441
		1899-12-31 02:22:21	2.98	-22.22	0.01	6.9	-0.16	-1.04	24.83	1.05	16.7	-23.09	29.97	3.32	6.32		-0.99246
		1899-12-31 02:22:21	2.98	-21.53	-0.01	6.79	-0.16	-1.1	24.45	1.11	17.38	-22.41	29.52	3.42	6.42		-1.06245
		1899-12-31 02:22:21	2.98	-20.86	-0.02	6.68	-0.16	-1.15	24.05	1.16	18.06	-21.73	29.07	3.52	6.52		-1.10067
		1899-12-31 02:22:21	2.98	-20.2	-0.04	6.56	-0.16	-1.2	23.63	1.21	18.72	-21.07	28.61	3.62	6.62		-1.17059
		1899-12-31 02:22:21	2.98	-19.54	-0.05	6.44	-0.15	-1.24	23.19	1.24	19.37	-20.42	28.14	3.72	6.72		-1.22274
		1899-12-31 02:22:21	2.97	-18.91	-0.07	6.32	-0.15	-1.26	22.74	1.27	20.01	-19.78	27.67	3.82	6.82		-1.24593
		1899-12-31 02:22:21	2.96	-18.28	-0.08	6.19	-0.14	-1.28	22.29	1.29	20.63	-19.16	27.19	3.92	6.92		-1.26092
		1899-12-31 02:22:21	2.95	-17.67	-0.1	6.06	-0.14	-1.29	21.83	1.29	21.24	-18.55	26.7	4.02	7.02		-1.2836
		1899-12-31 02:22:21	2.94	-17.07	-0.11	5.93	-0.13	-1.28	21.36	1.29	21.84	-17.95	26.2	4.12	7.12		-1.30525
		1899-12-31 02:22:21	2.93	-16.48	-0.12	5.8	-0.12	-1.27	20.9	1.28	22.43	-17.36	25.7	4.22	7.22		-1.27116
		1899-12-31 02:22:22	2.92	-15.91	-0.13	5.68	-0.11	-1.25	20.45	1.25	23.01	-16.78	25.18	4.32	7.32		-1.23773
		1899-12-31 02:22:22	2.9	-15.35	-0.15	5.55	-0.1	-1.21	20	1.22	23.57	-16.22	24.65	4.42	7.42		-1.25403
		1899-12-31 02:22:22	2.89	-14.8	-0.16	5.43	-0.09	-1.17	19.57	1.17	24.12	-15.67	24.12	4.52	7.52		-1.19354
		1899-12-31 02:22:22	2.87	-14.26	-0.16	5.32	-0.08	-1.12	19.16	1.12	24.65	-15.14	23.57	4.62	7.62		-1.1559
		1899-12-31 02:22:22	2.86	-13.73	-0.17	5.21	-0.07	-1.06	18.76	1.06	25.18	-14.61	23.01	4.72	7.72		-1.10412
		1899-12-31 02:22:22	2.84	-13.22	-0.18	5.11	-0.06	-1	18.39	1	25.7	-14.09	22.43	4.82	7.82		-1.01982
		1899-12-31 02:22:22	2.82	-12.71	-0.18	5.01	-0.05	-0.93	18.04	0.93	26.2	-13.59	21.84	4.92	7.92		-0.983835
		1899-12-31 02:22:22	2.8	-12.22	-0.19	4.92	-0.03	-0.86	17.71	0.86	26.7	-13.09	21.24	5.02	8.02		-0.910301
		1899-12-31 02:22:22	2.78	-11.73	-0.19	4.83	-0.02	-0.79	17.41	0.79	27.19	-12.6	20.63	5.12	8.12		-0.829554
		1899-12-31 02:22:22	2.76	-11.25	-0.19	4.76	-0.01	-0.71	17.14	0.71	27.67	-12.12	20.01	5.22	8.22		-0.749783
		1899-12-31 02:22:23	2.74	-10.78	-0.19	4.69	0	-0.64	16.89	0.64	28.14	-11.65	19.37	5.32	8.32		-0.698344
		1899-12-31 02:22:23	2.72	-10.31	-0.19	4.63	0.02	-0.56	16.67	0.56	28.61	-11.18	18.72	5.42	8.42		-0.606055
		1899-12-31 02:22:23	2.71	-9.85	-0.19	4.57	0.03	-0.49	16.47	0.49	29.07	-10.72	18.06	5.52	8.52		-0.555891
		1899-12-31 02:22:23	2.69	-9.4	-0.19	4.53	0.04	-0.42	16.31	0.42	29.52	-10.27	17.38	5.62	8.62		-0.449657
		1899-12-31 02:22:23	2.67	-8.95	-0.18	4.49	0.04	-0.34	16.16	0.35	29.97	-9.82	16.7	5.72	8.72		-0.417567
		1899-12-31 02:22:23	2.65	-8.5	-0.18	4.45	0.05	-0.27	16.05	0.28	30.42	-9.37	16	5.82	8.82		-0.303764
		1899-12-31 02:22:23	2.63	-8.05	-0.17	4.43	0.05	-0.21	15.96	0.21	30.86	-8.93	15.3	5.92	8.92		-0.252604
		1899-12-31 02:22:23	2.61	-7.61	-0.17	4.41	0.05	-0.15	15.89	0.16	31.31	-8.48	14.58	6.02	9.02		-0.191144
		1899-12-31 02:22:23	2.6	-7.17	-0.16	4.4	0.05	-0.09	15.84	0.11	31.75	-8.04	13.86	6.12	9.12		-0.139108
		1899-12-31 02:22:23	2.58	-6.73	-0.16	4.39	0.05	-0.04	15.82	0.06	32.19	-7.6	13.13	6.22	9.22		-0.0555205
		1899-12-31 02:22:24	2.57	-6.29	-0.15	4.39	0.04	0	15.81	0.04	32.63	-7.16	12.4	6.32	9.32		-0.0277339
		1899-12-31 02:22:24	2.55	-5.86	-0.15	4.39	0.04	0.04	15.81	0.05	33.07	-6.72	11.65	6.42	9.42		0
		1899-12-31 02:22:24	2.54	-5.42	-0.15	4.39	0.03	0.07	15.83	0.07	33.5	-6.29	10.9	6.52	9.52		0.0567758
		1899-12-31 02:22:24	2.52	-4.98	-0.14	4.4	0.02	0.09	15.85	0.09	33.94	-5.85	10.15	6.62	9.62		0.0555556
		1899-12-31 02:22:24	2.51	-4.54	-0.14	4.41	0.01	0.11	15.89	0.11	34.39	-5.4	9.39	6.72	9.72		0.108848
		1899-12-31 02:22:24	2.49	-4.09	-0.14	4.42	0.01	0.13	15.93	0.13	34.83	-4.96	8.62	6.82	9.82		0.111602
		1899-12-31 02:22:24	2.48	-3.65	-0.14	4.44	0	0.14	15.98	0.14	35.27	-4.52	7.85	6.92	9.92		0.139897
		1899-12-31 02:22:24	2.47	-3.21	-0.14	4.45	-0.01	0.15	16.03	0.15	35.72	-4.07	7.08	7.02	10.02		0.137217
		1899-12-31 02:22:24	2.45	-2.76	-0.14	4.47	-0.01	0.16	16.09	0.16	36.16	-3.63	6.3	7.12	10.12		0.168981
		1899-12-31 02:22:24	2.44	-2.31	-0.14	4.48	-0.02	0.16	16.15	0.16	36.61	-3.18	5.52	7.22	10.22		0.165844
		1899-12-31 02:22:25	2.42	-1.86	-0.15	4.5	-0.02	0.16	16.2	0.17	37.06	-2.73	4.74	7.32	10.32		0.138675
		1899-12-31 02:22:25	2.41	-1.41	-0.15	4.52	-0.02	0.16	16.26	0.17	37.51	-2.28	3.96	7.42	10.42		0.166975
		1899-12-31 02:22:25	2.39	-0.96	-0.15	4.53	-0.03	0.16	16.32	0.16	37.96	-1.83	3.17	#N/A	#N/A		0.167593
		1899-12-31 02:22:25	2.38	-0.51	-0.15	4.55	-0.03	0.16	16.38	0.16	38.42	-1.37	2.38	#N/A	#N/A		0.164553
		1899-12-31 02:22:25	2.36	-0.05	-0.16	4.56	-0.03	0.16	16.44	0.16	38.87	-0.92	1.59	#N/A	#N/A		0.168827
		1899-12-31 02:22:25	2.35	0.41	-0.16	4.58	-0.03	0.16	16.5	0.16	39.33	-0.46	0.79	#N/A	#N/A		0.165761
		1899-12-31 02:22:25	2.33	0.86	-0.16	4.6	-0.03	0.16	16.55	0.16	39.79	0	0	#N/A	#N/A		0.138595
10	1899-12-31 02:53:43	GlobalTime	X[m]	Y[m]	Vx[m/s]	Vy[m/s]	Ax[m/s2]	Ay[m/s2]	Speed[km/h]	Acceleration[m/s2]	Space[m]				3
		1899-12-31 02:53:43	2.09	-38.29	0.02	7.18	0.01	-0.03	25.83	0.03	0	-39.34	39.34	0.05	3.05									25.83	-39.34
		1899-12-31 02:53:43	2.09	-37.57	0.02	7.17	0.02	-0.03	25.82	0.04	0.72	-38.62	38.92	0.15	3.15		-0.027676
		1899-12-31 02:53:44	2.09	-36.86	0.02	7.17	0.02	-0.04	25.81	0.05	1.43	-37.91	38.49	0.25	3.25		-0.0280549
		1899-12-31 02:53:44	2.09	-36.14	0.02	7.16	0.02	-0.05	25.79	0.06	2.15	-37.19	38.07	0.35	3.35		-0.0552984
		1899-12-31 02:53:44	2.1	-35.42	0.03	7.16	0.03	-0.06	25.77	0.07	2.87	-36.47	37.65	0.45	3.45		-0.0552555
		1899-12-31 02:53:44	2.1	-34.71	0.03	7.15	0.03	-0.08	25.75	0.08	3.58	-35.76	37.22	0.55	3.55		-0.0559903
		1899-12-31 02:53:44	2.1	-33.99	0.03	7.14	0.03	-0.09	25.71	0.1	4.3	-35.04	36.79	0.65	3.65		-0.110297
		1899-12-31 02:53:44	2.11	-33.28	0.03	7.13	0.03	-0.11	25.68	0.12	5.01	-34.33	36.36	0.75	3.75		-0.0837735
		1899-12-31 02:53:44	2.11	-32.57	0.04	7.12	0.03	-0.13	25.64	0.14	5.72	-33.62	35.93	0.85	3.85		-0.111546
		1899-12-31 02:53:44	2.11	-31.86	0.04	7.11	0.03	-0.15	25.59	0.16	6.44	-32.9	35.5	0.95	3.95		-0.137255
		1899-12-31 02:53:44	2.12	-31.15	0.04	7.09	0.03	-0.18	25.53	0.18	7.15	-32.19	35.06	1.05	4.05		-0.166667		25.53	-32.19	0.1
		1899-12-31 02:53:44	2.12	-30.44	0.05	7.07	0.03	-0.2	25.46	0.21	7.85	-31.49	34.62	1.15	4.15		-0.196721
		1899-12-31 02:53:45	2.13	-29.73	0.05	7.05	0.03	-0.23	25.38	0.24	8.56	-30.78	34.18	1.25	4.25		-0.221005
		1899-12-31 02:53:45	2.13	-29.03	0.05	7.03	0.03	-0.26	25.3	0.27	9.26	-30.08	33.74	1.35	4.35		-0.223457
		1899-12-31 02:53:45	2.14	-28.33	0.06	7	0.03	-0.3	25.2	0.3	9.96	-29.38	33.29	1.45	4.45		-0.278329
		1899-12-31 02:53:45	2.14	-27.63	0.06	6.97	0.03	-0.33	25.09	0.33	10.66	-28.68	32.84	1.55	4.55		-0.304889
		1899-12-31 02:53:45	2.15	-26.93	0.06	6.93	0.03	-0.36	24.97	0.36	11.36	-27.98	32.38	1.65	4.65		-0.331085
		1899-12-31 02:53:45	2.16	-26.24	0.06	6.9	0.02	-0.39	24.83	0.39	12.05	-27.29	31.92	1.75	4.75		-0.389828
		1899-12-31 02:53:45	2.16	-25.55	0.07	6.86	0.03	-0.42	24.69	0.42	12.74	-26.6	31.45	1.85	4.85		-0.387636
		1899-12-31 02:53:45	2.17	-24.87	0.07	6.81	0.03	-0.45	24.53	0.45	13.42	-25.92	30.97	1.95	4.95		-0.446805
		1899-12-31 02:53:45	2.18	-24.19	0.07	6.77	0.03	-0.48	24.37	0.48	14.1	-25.24	30.49	2.05	5.05		-0.4439
		1899-12-31 02:53:45	2.18	-23.52	0.07	6.72	0.03	-0.51	24.19	0.51	14.78	-24.56	30.01	2.15	5.15		-0.495915
		1899-12-31 02:53:46	2.19	-22.85	0.08	6.67	0.04	-0.53	24	0.54	15.44	-23.9	29.51	2.25	5.25		-0.535219
		1899-12-31 02:53:46	2.2	-22.18	0.08	6.61	0.05	-0.56	23.81	0.56	16.11	-23.23	29.01	2.35	5.35		-0.523073
		1899-12-31 02:53:46	2.21	-21.52	0.09	6.56	0.05	-0.59	23.6	0.59	16.77	-22.57	28.5	2.45	5.45		-0.581983
		1899-12-31 02:53:46	2.22	-20.87	0.09	6.5	0.06	-0.61	23.39	0.61	17.42	-21.92	27.99	2.55	5.55		-0.585702
		1899-12-31 02:53:46	2.23	-20.22	0.1	6.43	0.06	-0.63	23.17	0.64	18.07	-21.27	27.46	2.65	5.65		-0.607977
		1899-12-31 02:53:46	2.24	-19.58	0.11	6.37	0.07	-0.65	22.94	0.66	18.71	-20.63	26.93	2.75	5.75		-0.639305
		1899-12-31 02:53:46	2.25	-18.95	0.11	6.3	0.08	-0.67	22.7	0.67	19.34	-20	26.39	2.85	5.85		-0.670782
		1899-12-31 02:53:46	2.26	-18.32	0.12	6.24	0.08	-0.68	22.46	0.69	19.97	-19.37	25.85	2.95	5.95		-0.663727
		1899-12-31 02:53:46	2.27	-17.7	0.13	6.17	0.08	-0.7	22.21	0.7	20.59	-18.75	25.29	3.05	6.05		-0.694911
		1899-12-31 02:53:46	2.28	-17.09	0.14	6.1	0.08	-0.71	21.96	0.71	21.2	-18.14	24.73	3.15	6.15		-0.698397
		1899-12-31 02:53:47	2.3	-16.48	0.14	6.03	0.08	-0.72	21.7	0.73	21.81	-17.53	24.16	3.25	6.25		-0.717947
		1899-12-31 02:53:47	2.31	-15.88	0.15	5.95	0.08	-0.73	21.44	0.74	22.41	-16.93	23.58	3.35	6.35		-0.721219
		1899-12-31 02:53:47	2.33	-15.29	0.16	5.88	0.07	-0.74	21.18	0.75	23	-16.34	23	3.45	6.45		-0.724602
		1899-12-31 02:53:47	2.35	-14.71	0.17	5.81	0.06	-0.75	20.91	0.75	23.58	-15.76	22.41	3.55	6.55		-0.755927
		1899-12-31 02:53:47	2.36	-14.13	0.17	5.73	0.05	-0.76	20.64	0.76	24.16	-15.18	21.81	3.65	6.65		-0.746228
		1899-12-31 02:53:47	2.38	-13.56	0.18	5.66	0.04	-0.77	20.37	0.77	24.73	-14.61	21.2	3.75	6.75		-0.749452
		1899-12-31 02:53:47	2.4	-13	0.18	5.58	0.03	-0.77	20.09	0.77	25.29	-14.05	20.59	3.85	6.85		-0.780478
		1899-12-31 02:53:47	2.42	-12.45	0.18	5.5	0.02	-0.77	19.82	0.77	25.85	-13.49	19.97	3.95	6.95		-0.742374
		1899-12-31 02:53:47	2.43	-11.9	0.19	5.42	0	-0.77	19.54	0.77	26.39	-12.95	19.34	4.05	7.05		-0.78738
		1899-12-31 02:53:47	2.45	-11.36	0.19	5.35	-0.01	-0.77	19.26	0.77	26.93	-12.41	18.71	4.15	7.15		-0.776177
		1899-12-31 02:53:48	2.47	-10.83	0.18	5.27	-0.03	-0.76	18.98	0.76	27.46	-11.88	18.07	4.25	7.25		-0.779408
		1899-12-31 02:53:48	2.49	-10.31	0.18	5.19	-0.04	-0.76	18.71	0.76	27.99	-11.35	17.42	4.35	7.35		-0.740763
		1899-12-31 02:53:48	2.51	-9.79	0.18	5.12	-0.06	-0.75	18.44	0.75	28.5	-10.84	16.77	4.45	7.45		-0.758783
		1899-12-31 02:53:48	2.53	-9.28	0.17	5.04	-0.08	-0.73	18.17	0.74	29.01	-10.33	16.11	4.55	7.55		-0.747753
		1899-12-31 02:53:48	2.54	-8.78	0.16	4.97	-0.09	-0.71	17.91	0.72	29.51	-9.83	15.44	4.65	7.65		-0.723827
		1899-12-31 02:53:48	2.56	-8.29	0.15	4.9	-0.11	-0.69	17.65	0.7	30.01	-9.33	14.78	4.75	7.75		-0.713395
		1899-12-31 02:53:48	2.57	-7.8	0.14	4.83	-0.12	-0.66	17.41	0.67	30.49	-8.85	14.1	4.85	7.85		-0.676312
		1899-12-31 02:53:48	2.59	-7.32	0.13	4.77	-0.14	-0.63	17.17	0.64	30.97	-8.37	13.42	4.95	7.95		-0.667052
		1899-12-31 02:53:48	2.6	-6.85	0.11	4.71	-0.15	-0.59	16.95	0.61	31.45	-7.89	12.74	5.05	8.05		-0.603331
		1899-12-31 02:53:48	2.61	-6.38	0.1	4.65	-0.17	-0.55	16.74	0.57	31.92	-7.42	12.05	5.15	8.15		-0.580748
		1899-12-31 02:53:49	2.62	-5.92	0.08	4.6	-0.18	-0.5	16.55	0.53	32.38	-6.96	11.36	5.25	8.25		-0.530487
		1899-12-31 02:53:49	2.62	-5.46	0.06	4.55	-0.19	-0.46	16.37	0.49	32.84	-6.5	10.66	5.35	8.35		-0.496981
		1899-12-31 02:53:49	2.63	-5.01	0.04	4.5	-0.2	-0.41	16.21	0.46	33.29	-6.05	9.96	5.45	8.45		-0.446914
		1899-12-31 02:53:49	2.63	-4.56	0.02	4.46	-0.21	-0.36	16.07	0.42	33.74	-5.6	9.26	5.55	8.55		-0.387449
		1899-12-31 02:53:49	2.63	-4.12	0	4.43	-0.22	-0.32	15.94	0.39	34.18	-5.16	8.56	5.65	8.65		-0.364873
		1899-12-31 02:53:49	2.63	-3.68	-0.02	4.4	-0.23	-0.28	15.83	0.36	34.62	-4.72	7.85	5.75	8.75		-0.306424
		1899-12-31 02:53:49	2.63	-3.24	-0.04	4.37	-0.23	-0.25	15.73	0.34	35.06	-4.28	7.15	5.85	8.85		-0.276726
		1899-12-31 02:53:49	2.62	-2.8	-0.07	4.35	-0.23	-0.22	15.65	0.32	35.5	-3.84	6.44	5.95	8.95		-0.220118
		1899-12-31 02:53:49	2.62	-2.37	-0.09	4.32	-0.24	-0.2	15.57	0.31	35.93	-3.41	5.72	6.05	9.05		-0.224088
		1899-12-31 02:53:49	2.61	-1.94	-0.12	4.3	-0.24	-0.19	15.5	0.3	36.36	-2.98	5.01	6.15	9.15		-0.195135
		1899-12-31 02:53:50	2.59	-1.51	-0.14	4.29	-0.24	-0.18	15.44	0.3	36.79	-2.55	4.3	6.25	9.25		-0.166559
		1899-12-31 02:53:50	2.58	-1.08	-0.16	4.27	-0.24	-0.17	15.38	0.29	37.22	-2.12	3.58	6.35	9.35		-0.165913
		1899-12-31 02:53:50	2.56	-0.65	-0.19	4.25	-0.24	-0.16	15.32	0.29	37.65	-1.69	2.87	#N/A	#N/A		-0.165267
		1899-12-31 02:53:50	2.54	-0.23	-0.21	4.24	-0.24	-0.16	15.27	0.29	38.07	-1.27	2.15	#N/A	#N/A		-0.140496
		1899-12-31 02:53:50	2.52	0.19	-0.24	4.22	-0.24	-0.16	15.22	0.29	38.49	-0.85	1.43	#N/A	#N/A		-0.140037
		1899-12-31 02:53:50	2.49	0.62	-0.26	4.2	-0.24	-0.16	15.16	0.29	38.92	-0.42	0.72	#N/A	#N/A		-0.163544
		1899-12-31 02:53:50	2.47	1.04	-0.28	4.19	-0.24	-0.16	15.11	0.29	39.34	0	0	#N/A	#N/A		-0.139027
11	1899-12-31 03:26:48	GlobalTime	X[m]	Y[m]	Vx[m/s]	Vy[m/s]	Ax[m/s2]	Ay[m/s2]	Speed[km/h]	Acceleration[m/s2]	Space[m]				3
		1899-12-31 03:26:51	3.46	-38.34	-0.33	7.84	-0.01	-0.09	28.24	0.1	0	-37.59	37.59	2.38	5.38
		1899-12-31 03:26:51	3.43	-37.56	-0.33	7.83	-0.02	-0.12	28.2	0.12	0.78	-36.81	37.04	2.48	5.48		-0.111665
		1899-12-31 03:26:51	3.39	-36.77	-0.33	7.81	-0.02	-0.15	28.15	0.15	1.57	-36.02	36.49	2.58	5.58		-0.137595
		1899-12-31 03:26:51	3.36	-35.99	-0.33	7.8	-0.02	-0.18	28.1	0.18	2.35	-35.24	35.93	2.68	5.68		-0.139111
		1899-12-31 03:26:51	3.33	-35.22	-0.33	7.78	-0.03	-0.21	28.03	0.21	3.13	-34.46	35.37	2.78	5.78		-0.194341
		1899-12-31 03:26:51	3.29	-34.44	-0.34	7.76	-0.02	-0.24	27.95	0.24	3.91	-33.68	34.79	2.88	5.88		-0.22151
		1899-12-31 03:26:51	3.26	-33.66	-0.34	7.73	-0.02	-0.27	27.86	0.27	4.68	-32.91	34.22	2.98	5.98		-0.251668
		1899-12-31 03:26:51	3.23	-32.89	-0.34	7.7	-0.01	-0.29	27.76	0.29	5.45	-32.14	33.63	3.08	6.08		-0.27868
		1899-12-31 03:26:51	3.19	-32.12	-0.34	7.67	0	-0.32	27.66	0.32	6.22	-31.37	33.04	3.18	6.18		-0.277678
		1899-12-31 03:26:51	3.16	-31.36	-0.34	7.64	0.02	-0.34	27.54	0.34	6.99	-30.6	32.45	3.28	6.28		-0.33189
		1899-12-31 03:26:52	3.12	-30.59	-0.34	7.61	0.03	-0.36	27.41	0.36	7.75	-29.84	31.85	3.38	6.38		-0.362629
		1899-12-31 03:26:52	3.09	-29.84	-0.33	7.57	0.06	-0.38	27.28	0.39	8.51	-29.08	31.24	3.48	6.48		-0.360913
		1899-12-31 03:26:52	3.06	-29.08	-0.33	7.53	0.08	-0.4	27.14	0.41	9.27	-28.32	30.62	3.58	6.58		-0.386757
		1899-12-31 03:26:52	3.03	-28.33	-0.32	7.49	0.1	-0.41	26.99	0.43	10.02	-27.57	30	3.68	6.68		-0.41767
		1899-12-31 03:26:52	2.99	-27.58	-0.31	7.45	0.13	-0.43	26.84	0.45	10.77	-26.82	29.37	3.78	6.78		-0.415355
		1899-12-31 03:26:52	2.96	-26.84	-0.29	7.41	0.16	-0.43	26.68	0.46	11.51	-26.08	28.74	3.88	6.88		-0.446446
		1899-12-31 03:26:52	2.93	-26.1	-0.28	7.36	0.19	-0.44	26.53	0.48	12.25	-25.34	28.1	3.98	6.98		-0.416119
		1899-12-31 03:26:52	2.91	-25.37	-0.26	7.32	0.21	-0.44	26.36	0.49	12.98	-24.61	27.46	4.08	7.08		-0.475187
		1899-12-31 03:26:52	2.88	-24.64	-0.24	7.28	0.23	-0.44	26.2	0.49	13.71	-23.88	26.81	4.18	7.18		-0.444444
		1899-12-31 03:26:52	2.86	-23.91	-0.21	7.23	0.25	-0.43	26.05	0.5	14.44	-23.15	26.16	4.28	7.28		-0.414209
		1899-12-31 03:26:53	2.84	-23.19	-0.19	7.19	0.27	-0.42	25.89	0.5	15.16	-22.43	25.5	4.38	7.38		-0.445302
		1899-12-31 03:26:53	2.82	-22.47	-0.16	7.15	0.28	-0.41	25.74	0.5	15.88	-21.71	24.84	4.48	7.48		-0.414979
		1899-12-31 03:26:53	2.81	-21.76	-0.13	7.11	0.29	-0.4	25.59	0.5	16.59	-21	24.17	4.58	7.58		-0.418378
		1899-12-31 03:26:53	2.8	-21.05	-0.1	7.07	0.29	-0.4	25.44	0.49	17.3	-20.29	23.5	4.68	7.68		-0.415933
		1899-12-31 03:26:53	2.79	-20.35	-0.07	7.03	0.29	-0.39	25.3	0.48	18	-19.59	22.83	4.78	7.78		-0.391512
		1899-12-31 03:26:53	2.78	-19.65	-0.04	6.99	0.28	-0.38	25.16	0.47	18.71	-18.88	22.15	4.88	7.88		-0.383868
		1899-12-31 03:26:53	2.78	-18.95	-0.02	6.95	0.27	-0.38	25.02	0.46	19.4	-18.19	21.47	4.98	7.98		-0.392803
		1899-12-31 03:26:53	2.78	-18.26	0.01	6.91	0.25	-0.37	24.88	0.45	20.1	-17.49	20.78	5.08	8.08		-0.385031
		1899-12-31 03:26:53	2.78	-17.57	0.03	6.87	0.23	-0.37	24.75	0.44	20.78	-16.81	20.1	5.18	8.18		-0.366053
		1899-12-31 03:26:53	2.79	-16.88	0.06	6.84	0.21	-0.38	24.62	0.43	21.47	-16.12	19.4	5.28	8.28		-0.358858
		1899-12-31 03:26:54	2.79	-16.2	0.08	6.8	0.18	-0.38	24.48	0.42	22.15	-15.44	18.71	5.38	8.38		-0.390001
		1899-12-31 03:26:54	2.8	-15.52	0.09	6.76	0.15	-0.39	24.34	0.42	22.83	-14.76	18	5.48	8.48		-0.387777
		1899-12-31 03:26:54	2.81	-14.85	0.11	6.72	0.12	-0.4	24.2	0.42	23.5	-14.09	17.3	5.58	8.58		-0.391307
		1899-12-31 03:26:54	2.82	-14.18	0.12	6.68	0.08	-0.41	24.06	0.42	24.17	-13.42	16.59	5.68	8.68		-0.38905
		1899-12-31 03:26:54	2.84	-13.51	0.13	6.64	0.05	-0.43	23.91	0.43	24.84	-12.75	15.88	5.78	8.78		-0.414335
		1899-12-31 03:26:54	2.85	-12.85	0.13	6.6	0.01	-0.44	23.75	0.44	25.5	-12.09	15.16	5.88	8.88		-0.445754
		1899-12-31 03:26:54	2.86	-12.19	0.13	6.55	-0.03	-0.46	23.59	0.47	26.16	-11.43	14.44	5.98	8.98		-0.442761
		1899-12-31 03:26:54	2.87	-11.54	0.12	6.5	-0.06	-0.49	23.42	0.49	26.81	-10.78	13.71	6.08	9.08		-0.474341
		1899-12-31 03:26:54	2.89	-10.89	0.12	6.46	-0.1	-0.51	23.24	0.52	27.46	-10.13	12.98	6.18	9.18		-0.498504		23.24	-10.13	2.4
		1899-12-31 03:26:54	2.9	-10.25	0.11	6.4	-0.13	-0.53	23.06	0.55	28.1	-9.49	12.25	6.28	9.28		-0.502387
		1899-12-31 03:26:55	2.91	-9.61	0.09	6.35	-0.16	-0.55	22.86	0.58	28.74	-8.85	11.51	6.38	9.38		-0.553627
		1899-12-31 03:26:55	2.92	-8.98	0.07	6.29	-0.19	-0.57	22.66	0.6	29.37	-8.22	10.77	6.48	9.48		-0.557515
		1899-12-31 03:26:55	2.92	-8.35	0.05	6.24	-0.22	-0.59	22.45	0.63	30	-7.59	10.02	6.58	9.58		-0.580118
		1899-12-31 03:26:55	2.93	-7.73	0.03	6.18	-0.24	-0.61	22.24	0.65	30.62	-6.97	9.27	6.68	9.68		-0.583987
		1899-12-31 03:26:55	2.93	-7.12	0.01	6.12	-0.26	-0.62	22.02	0.67	31.24	-6.35	8.51	6.78	9.78		-0.605909
		1899-12-31 03:26:55	2.93	-6.51	-0.02	6.05	-0.28	-0.63	21.79	0.69	31.85	-5.74	7.75	6.88	9.88		-0.637289
		1899-12-31 03:26:55	2.92	-5.91	-0.05	5.99	-0.3	-0.63	21.57	0.7	32.45	-5.14	6.99	6.98	9.98		-0.613374
		1899-12-31 03:26:55	2.92	-5.31	-0.08	5.93	-0.31	-0.63	21.34	0.7	33.04	-4.55	6.22	7.08	10.08		-0.645356
		1899-12-31 03:26:55	2.91	-4.72	-0.11	5.86	-0.32	-0.63	21.12	0.71	33.63	-3.96	5.45	7.18	10.18		-0.610823
		1899-12-31 03:26:55	2.9	-4.14	-0.14	5.8	-0.33	-0.63	20.89	0.71	34.22	-3.37	4.68	7.28	10.28		-0.63182
		1899-12-31 03:26:56	2.88	-3.56	-0.18	5.74	-0.34	-0.62	20.67	0.71	34.79	-2.8	3.91	7.38	10.38		-0.618854
		1899-12-31 03:26:56	2.86	-2.99	-0.21	5.68	-0.34	-0.62	20.45	0.71	35.37	-2.22	3.13	7.48	10.48		-0.601745
		1899-12-31 03:26:56	2.84	-2.43	-0.25	5.62	-0.35	-0.62	20.23	0.71	35.93	-1.66	2.35	7.58	10.58		-0.616567
		1899-12-31 03:26:56	2.81	-1.87	-0.28	5.55	-0.35	-0.61	20.02	0.71	36.49	-1.1	1.57	7.68	10.68		-0.582321
		1899-12-31 03:26:56	2.78	-1.31	-0.32	5.49	-0.35	-0.61	19.81	0.71	37.04	-0.55	0.78	7.78	10.78		-0.586721
		1899-12-31 03:26:56	2.75	-0.77	-0.35	5.43	-0.35	-0.61	19.59	0.71	37.59	0	0	7.88	10.88		-0.608025
12	1899-12-31 04:02:12	GlobalTime	X[m]	Y[m]	Vx[m/s]	Vy[m/s]	Ax[m/s2]	Ay[m/s2]	Speed[km/h]	Acceleration[m/s2]	Space[m]				3
		1899-12-31 04:02:10	2.55	-38.76	-0.27	5.3	0.03	-0.09	19.12	0.1	0	-35.36	35.36	-1.9	1.1							19.12	-35.36
		1899-12-31 04:02:10	2.53	-38.23	-0.26	5.29	0.03	-0.12	19.08	0.13	0.53	-34.83	35.07	-1.8	1.2		-0.111228
		1899-12-31 04:02:10	2.5	-37.7	-0.26	5.28	0.04	-0.15	19.03	0.15	1.06	-34.3	34.77	-1.7	1.3		-0.138707
		1899-12-31 04:02:11	2.47	-37.18	-0.25	5.26	0.05	-0.18	18.98	0.18	1.59	-33.77	34.47	-1.6	1.4		-0.138343
		1899-12-31 04:02:11	2.45	-36.65	-0.25	5.25	0.06	-0.2	18.91	0.21	2.11	-33.25	34.17	-1.5	1.5		-0.196782
		1899-12-31 04:02:11	2.42	-36.13	-0.24	5.23	0.07	-0.23	18.83	0.24	2.64	-32.72	33.86	-1.4	1.6		-0.219776
		1899-12-31 04:02:11	2.4	-35.61	-0.24	5.2	0.08	-0.26	18.74	0.27	3.16	-32.2	33.55	-1.3	1.7		-0.250868
		1899-12-31 04:02:11	2.38	-35.09	-0.23	5.18	0.1	-0.28	18.65	0.3	3.68	-31.68	33.23	-1.2	1.8		-0.249666
		1899-12-31 04:02:11	2.35	-34.57	-0.22	5.15	0.11	-0.3	18.54	0.33	4.2	-31.16	32.91	-1.1	1.9		-0.303515
		1899-12-31 04:02:11	2.33	-34.06	-0.2	5.11	0.13	-0.33	18.43	0.35	4.71	-30.65	32.58	-1	2		-0.307636
		1899-12-31 04:02:11	2.31	-33.55	-0.19	5.08	0.15	-0.35	18.31	0.38	5.22	-30.14	32.25	-0.9	2.1		-0.333515
		1899-12-31 04:02:11	2.3	-33.04	-0.17	5.05	0.16	-0.37	18.17	0.41	5.73	-29.63	31.92	-0.8	2.2		-0.386347
		1899-12-31 04:02:11	2.28	-32.54	-0.16	5.01	0.18	-0.39	18.04	0.43	6.23	-29.13	31.58	-0.7	2.3		-0.363218
		1899-12-31 04:02:12	2.26	-32.04	-0.14	4.97	0.2	-0.41	17.89	0.46	6.73	-28.63	31.24	-0.6	2.4		-0.415856
		1899-12-31 04:02:12	2.25	-31.55	-0.12	4.93	0.21	-0.43	17.74	0.48	7.22	-28.14	30.9	-0.5	2.5		-0.4208
		1899-12-31 04:02:12	2.24	-31.06	-0.1	4.88	0.22	-0.44	17.58	0.49	7.71	-27.65	30.55	-0.4	2.6		-0.444948
		1899-12-31 04:02:12	2.23	-30.57	-0.08	4.84	0.23	-0.45	17.42	0.51	8.2	-27.16	30.2	-0.3	2.7		-0.440917
		1899-12-31 04:02:12	2.23	-30.09	-0.05	4.79	0.24	-0.46	17.25	0.52	8.68	-26.68	29.85	-0.2	2.8		-0.473725
		1899-12-31 04:02:12	2.22	-29.61	-0.03	4.75	0.24	-0.46	17.09	0.52	9.16	-26.2	29.5	-0.1	2.9		-0.441615
		1899-12-31 04:02:12	2.22	-29.14	0	4.7	0.24	-0.46	16.92	0.52	9.63	-25.73	29.14	0	3		-0.474594							16.92	-25.73
		1899-12-31 04:02:12	2.22	-28.67	0.02	4.65	0.24	-0.46	16.75	0.52	10.1	-25.26	28.79	0.1	3.1		-0.46985
		1899-12-31 04:02:12	2.22	-28.21	0.04	4.61	0.23	-0.45	16.59	0.51	10.56	-24.8	28.43	0.2	3.2		-0.447397
		1899-12-31 04:02:12	2.23	-27.75	0.07	4.56	0.23	-0.44	16.43	0.5	11.02	-24.34	28.07	0.3	3.3		-0.443103
		1899-12-31 04:02:13	2.24	-27.3	0.09	4.52	0.21	-0.43	16.27	0.48	11.47	-23.89	27.72	0.4	3.4		-0.44856
		1899-12-31 04:02:13	2.25	-26.85	0.11	4.48	0.2	-0.42	16.12	0.46	11.92	-23.44	27.36	0.5	3.5		-0.416538
		1899-12-31 04:02:13	2.26	-26.4	0.13	4.44	0.18	-0.41	15.97	0.45	12.37	-22.99	27	0.6	3.6		-0.41268
		1899-12-31 04:02:13	2.27	-25.96	0.15	4.39	0.17	-0.39	15.83	0.43	12.81	-22.55	26.63	0.7	3.7		-0.390362
		1899-12-31 04:02:13	2.29	-25.52	0.16	4.36	0.15	-0.38	15.69	0.41	13.25	-22.11	26.27	0.8	3.8		-0.386925
		1899-12-31 04:02:13	2.31	-25.09	0.18	4.32	0.13	-0.37	15.56	0.39	13.68	-21.68	25.91	0.9	3.9		-0.364494
		1899-12-31 04:02:13	2.32	-24.66	0.19	4.28	0.1	-0.35	15.43	0.37	14.11	-21.25	25.54	1	4		-0.361461
		1899-12-31 04:02:13	2.34	-24.23	0.2	4.25	0.08	-0.34	15.31	0.35	14.54	-20.82	25.17	1.1	4.1		-0.330965
		1899-12-31 04:02:13	2.36	-23.81	0.21	4.21	0.06	-0.33	15.19	0.33	14.96	-20.4	24.8	1.2	4.2		-0.336199
		1899-12-31 04:02:13	2.38	-23.39	0.21	4.18	0.04	-0.31	15.07	0.31	15.38	-19.98	24.43	1.3	4.3		-0.333554		15.07	-19.98	-1.9
		1899-12-31 04:02:14	2.41	-22.97	0.21	4.15	0.01	-0.3	14.96	0.3	15.8	-19.56	24.06	1.4	4.4		-0.303434
		1899-12-31 04:02:14	2.43	-22.56	0.22	4.12	-0.01	-0.28	14.86	0.28	16.22	-19.14	23.68	1.5	4.5		-0.27392
		1899-12-31 04:02:14	2.45	-22.15	0.21	4.09	-0.02	-0.27	14.76	0.27	16.63	-18.73	23.31	1.6	4.6		-0.278719
		1899-12-31 04:02:14	2.47	-21.74	0.21	4.07	-0.04	-0.25	14.67	0.25	17.04	-18.32	22.93	1.7	4.7		-0.249238
		1899-12-31 04:02:14	2.49	-21.33	0.21	4.04	-0.05	-0.23	14.58	0.24	17.44	-17.92	22.55	1.8	4.8		-0.253906
		1899-12-31 04:02:14	2.51	-20.93	0.2	4.02	-0.06	-0.22	14.5	0.22	17.85	-17.51	22.16	1.9	4.9		-0.21891
		1899-12-31 04:02:14	2.53	-20.53	0.2	4	-0.07	-0.2	14.42	0.21	18.25	-17.11	21.78	2	5		-0.223148
		1899-12-31 04:02:14	2.55	-20.13	0.19	3.98	-0.07	-0.19	14.35	0.2	18.65	-16.71	21.39	2.1	5.1		-0.194242
		1899-12-31 04:02:14	2.57	-19.73	0.18	3.96	-0.07	-0.18	14.28	0.19	19.04	-16.32	21.01	2.2	5.2		-0.198253
		1899-12-31 04:02:14	2.59	-19.34	0.18	3.94	-0.06	-0.17	14.21	0.18	19.44	-15.92	20.62	2.3	5.3		-0.192351
		1899-12-31 04:02:15	2.6	-18.94	0.17	3.93	-0.06	-0.16	14.15	0.17	19.83	-15.53	20.23	2.4	5.4		-0.168329
		1899-12-31 04:02:15	2.62	-18.55	0.16	3.91	-0.05	-0.16	14.1	0.17	20.23	-15.13	19.83	2.5	5.5		-0.136236
		1899-12-31 04:02:15	2.64	-18.16	0.16	3.9	-0.04	-0.16	14.04	0.16	20.62	-14.74	19.44	2.6	5.6		-0.167023
		1899-12-31 04:02:15	2.65	-17.77	0.16	3.88	-0.03	-0.16	13.98	0.16	21.01	-14.35	19.04	2.7	5.7		-0.166311
		1899-12-31 04:02:15	2.67	-17.38	0.15	3.86	-0.01	-0.16	13.92	0.16	21.39	-13.97	18.65	2.8	5.8		-0.169956
		1899-12-31 04:02:15	2.68	-17	0.15	3.85	0	-0.17	13.86	0.17	21.78	-13.58	18.25	2.9	5.9		-0.164886
		1899-12-31 04:02:15	2.7	-16.62	0.15	3.83	0.02	-0.17	13.8	0.17	22.16	-13.2	17.85	3	6		-0.168494
		1899-12-31 04:02:15	2.71	-16.23	0.15	3.81	0.03	-0.18	13.74	0.18	22.55	-12.81	17.44	3.1	6.1		-0.163462
		1899-12-31 04:02:15	2.73	-15.85	0.16	3.8	0.05	-0.18	13.68	0.19	22.93	-12.43	17.04	3.2	6.2		-0.167032
		1899-12-31 04:02:15	2.75	-15.47	0.16	3.78	0.06	-0.19	13.61	0.2	23.31	-12.05	16.63	3.3	6.3		-0.193947
		1899-12-31 04:02:16	2.76	-15.1	0.17	3.76	0.08	-0.19	13.54	0.21	23.68	-11.68	16.22	3.4	6.4		-0.198167
		1899-12-31 04:02:16	2.78	-14.72	0.18	3.74	0.09	-0.2	13.48	0.22	24.06	-11.3	15.8	3.5	6.5		-0.164596
		1899-12-31 04:02:16	2.8	-14.35	0.19	3.72	0.1	-0.2	13.41	0.22	24.43	-10.93	15.38	3.6	6.6		-0.196269
		1899-12-31 04:02:16	2.82	-13.98	0.2	3.7	0.11	-0.2	13.34	0.22	24.8	-10.56	14.96	3.7	6.7		-0.195247
		1899-12-31 04:02:16	2.84	-13.61	0.21	3.68	0.11	-0.19	13.27	0.22	25.17	-10.19	14.54	3.8	6.8		-0.194225
		1899-12-31 04:02:16	2.86	-13.24	0.22	3.66	0.12	-0.18	13.2	0.21	25.54	-9.82	14.11	3.9	6.9		-0.193204
		1899-12-31 04:02:16	2.88	-12.88	0.23	3.64	0.12	-0.17	13.14	0.2	25.91	-9.45	13.68	4	7		-0.16479
		1899-12-31 04:02:16	2.91	-12.51	0.24	3.63	0.12	-0.15	13.09	0.19	26.27	-9.09	13.25	4.1	7.1		-0.14055
		1899-12-31 04:02:16	2.93	-12.15	0.25	3.61	0.11	-0.14	13.04	0.18	26.63	-8.73	12.81	4.2	7.2		-0.140014
		1899-12-31 04:02:16	2.96	-11.79	0.27	3.6	0.11	-0.12	12.99	0.16	27	-8.36	12.37	4.3	7.3		-0.135709
		1899-12-31 04:02:17	2.98	-11.43	0.28	3.59	0.1	-0.11	12.95	0.15	27.36	-8	11.92	4.4	7.4		-0.111197
		1899-12-31 04:02:17	3.01	-11.07	0.29	3.58	0.09	-0.1	12.92	0.13	27.72	-7.64	11.47	4.5	7.5		-0.0831726
		1899-12-31 04:02:17	3.04	-10.72	0.29	3.57	0.07	-0.1	12.89	0.12	28.07	-7.29	11.02	4.6	7.6		-0.0853505
		1899-12-31 04:02:17	3.07	-10.36	0.3	3.56	0.06	-0.1	12.85	0.12	28.43	-6.93	10.56	4.7	7.7		-0.11034
		1899-12-31 04:02:17	3.1	-10	0.31	3.55	0.04	-0.11	12.82	0.12	28.79	-6.57	10.1	4.8	7.8		-0.0825296
		1899-12-31 04:02:17	3.13	-9.65	0.31	3.54	0.03	-0.13	12.78	0.13	29.14	-6.22	9.63	4.9	7.9		-0.112875
		1899-12-31 04:02:17	3.16	-9.3	0.31	3.52	0.01	-0.15	12.73	0.15	29.5	-5.86	9.16	5	8		-0.136692
		1899-12-31 04:02:17	3.19	-8.95	0.31	3.51	-0.01	-0.18	12.67	0.18	29.85	-5.51	8.68	5.1	8.1		-0.167989
		1899-12-31 04:02:17	3.23	-8.6	0.31	3.49	-0.02	-0.21	12.6	0.21	30.2	-5.16	8.2	5.2	8.2		-0.194985
		1899-12-31 04:02:17	3.26	-8.25	0.31	3.46	-0.04	-0.24	12.52	0.25	30.55	-4.81	7.71	5.3	8.3		-0.221517
		1899-12-31 04:02:18	3.29	-7.9	0.3	3.44	-0.06	-0.28	12.43	0.28	30.9	-4.46	7.22	5.4	8.4		-0.24752
		1899-12-31 04:02:18	3.32	-7.56	0.3	3.41	-0.07	-0.31	12.32	0.32	31.24	-4.12	6.73	5.5	8.5		-0.308926
		1899-12-31 04:02:18	3.35	-7.22	0.29	3.38	-0.08	-0.34	12.21	0.35	31.58	-3.78	6.23	5.6	8.6		-0.30618
		1899-12-31 04:02:18	3.37	-6.89	0.28	3.34	-0.1	-0.37	12.08	0.38	31.92	-3.44	5.73	5.7	8.7		-0.358308
		1899-12-31 04:02:18	3.4	-6.55	0.27	3.31	-0.11	-0.39	11.94	0.4	32.25	-3.11	5.22	5.8	8.8		-0.393144
		1899-12-31 04:02:18	3.43	-6.22	0.26	3.27	-0.12	-0.4	11.8	0.42	32.58	-2.78	4.71	5.9	8.9		-0.388562
		1899-12-31 04:02:18	3.45	-5.9	0.25	3.23	-0.12	-0.41	11.65	0.43	32.91	-2.45	4.2	6	9		-0.41123
		1899-12-31 04:02:18	3.48	-5.58	0.24	3.18	-0.13	-0.42	11.49	0.44	33.23	-2.13	3.68	6.1	9.1		-0.446373
		1899-12-31 04:02:18	3.5	-5.26	0.22	3.14	-0.14	-0.42	11.34	0.44	33.55	-1.81	3.16	6.2	9.2		-0.412869
		1899-12-31 04:02:18	3.52	-4.95	0.21	3.1	-0.14	-0.42	11.18	0.45	33.86	-1.5	2.64	6.3	9.3		-0.448427
		1899-12-31 04:02:19	3.54	-4.64	0.19	3.06	-0.14	-0.42	11.03	0.45	34.17	-1.19	2.11	6.4	9.4		-0.414613
		1899-12-31 04:02:19	3.56	-4.34	0.18	3.01	-0.14	-0.42	10.87	0.45	34.47	-0.89	1.59	6.5	9.5		-0.450617
		1899-12-31 04:02:19	3.58	-4.04	0.17	2.97	-0.14	-0.42	10.71	0.45	34.77	-0.59	1.06	6.6	9.6		-0.444033
		1899-12-31 04:02:19	3.59	-3.75	0.15	2.93	-0.14	-0.42	10.56	0.45	35.07	-0.29	0.53	6.7	9.7		-0.410301
		1899-12-31 04:02:19	3.61	-3.45	0.14	2.89	-0.14	-0.42	10.4	0.45	35.36	0	0	6.8	9.8		-0.446147
13	1899-12-31 04:06:01	GlobalTime	X[m]	Y[m]	Vx[m/s]	Vy[m/s]	Ax[m/s2]	Ay[m/s2]	Speed[km/h]	Acceleration[m/s2]	Space[m]				3
		1899-12-31 04:06:04	2.5	-38.08	0.12	8.38	0	-0.06	30.16	0.06	0	-40.36	40.36	2.85	5.85
		1899-12-31 04:06:04	2.51	-37.24	0.12	8.37	0	-0.08	30.13	0.08	0.84	-39.52	40.05	2.95	5.95		-0.0830715
		1899-12-31 04:06:04	2.52	-36.41	0.12	8.36	0	-0.1	30.1	0.1	1.67	-38.69	39.73	3.05	6.05		-0.0839887
		1899-12-31 04:06:04	2.53	-35.57	0.12	8.35	0	-0.12	30.06	0.12	2.51	-37.85	39.4	3.15	6.15		-0.110523
		1899-12-31 04:06:04	2.54	-34.74	0.12	8.34	0	-0.14	30.02	0.14	3.34	-37.02	39.04	3.25	6.25		-0.111706
		1899-12-31 04:06:05	2.56	-33.9	0.12	8.32	0	-0.16	29.97	0.16	4.18	-36.18	38.67	3.35	6.35		-0.137764
		1899-12-31 04:06:05	2.57	-33.07	0.12	8.31	0	-0.18	29.91	0.18	5.01	-35.35	38.28	3.45	6.45		-0.167001
		1899-12-31 04:06:05	2.58	-32.24	0.12	8.29	0	-0.21	29.84	0.21	5.84	-34.52	37.88	3.55	6.55		-0.194412
		1899-12-31 04:06:05	2.59	-31.42	0.12	8.27	-0.01	-0.23	29.76	0.23	6.67	-33.69	37.45	3.65	6.65		-0.221627
		1899-12-31 04:06:05	2.61	-30.59	0.12	8.24	-0.01	-0.26	29.67	0.26	7.49	-32.87	37.02	3.75	6.75		-0.251651
		1899-12-31 04:06:05	2.62	-29.77	0.12	8.21	-0.01	-0.29	29.57	0.29	8.31	-32.05	36.56	3.85	6.85		-0.278719
		1899-12-31 04:06:05	2.63	-28.95	0.12	8.18	-0.02	-0.32	29.47	0.32	9.13	-31.23	36.09	3.95	6.95		-0.277778
		1899-12-31 04:06:05	2.64	-28.13	0.12	8.15	-0.03	-0.34	29.35	0.34	9.95	-30.41	35.6	4.05	7.05		-0.332091
		1899-12-31 04:06:05	2.65	-27.32	0.11	8.12	-0.04	-0.37	29.22	0.37	10.76	-29.6	35.09	4.15	7.15		-0.362659
		1899-12-31 04:06:05	2.66	-26.51	0.11	8.08	-0.05	-0.4	29.08	0.4	11.57	-28.79	34.57	4.25	7.25		-0.388756
		1899-12-31 04:06:06	2.67	-25.7	0.1	8.04	-0.06	-0.42	28.94	0.43	12.38	-27.98	34.03	4.35	7.35		-0.386888
		1899-12-31 04:06:06	2.68	-24.9	0.1	7.99	-0.07	-0.45	28.78	0.45	13.18	-27.18	33.48	4.45	7.45		-0.44537
		1899-12-31 04:06:06	2.69	-24.1	0.09	7.95	-0.08	-0.47	28.62	0.48	13.98	-26.38	32.92	4.55	7.55		-0.442901
		1899-12-31 04:06:06	2.7	-23.31	0.08	7.9	-0.09	-0.5	28.44	0.51	14.77	-25.59	32.34	4.65	7.65		-0.501582		28.44	-25.59	3
		1899-12-31 04:06:06	2.71	-22.52	0.07	7.85	-0.11	-0.52	28.26	0.53	15.56	-24.8	31.75	4.75	7.75		-0.498418
		1899-12-31 04:06:06	2.72	-21.74	0.06	7.8	-0.12	-0.55	28.07	0.56	16.34	-24.02	31.15	4.85	7.85		-0.529375
		1899-12-31 04:06:06	2.72	-20.96	0.05	7.74	-0.13	-0.57	27.87	0.59	17.12	-23.24	30.53	4.95	7.95		-0.553379
		1899-12-31 04:06:06	2.73	-20.19	0.04	7.68	-0.14	-0.6	27.66	0.61	17.89	-22.47	29.9	5.05	8.05		-0.58428
		1899-12-31 04:06:06	2.73	-19.43	0.02	7.62	-0.15	-0.62	27.44	0.64	18.66	-21.7	29.27	5.15	8.15		-0.607363
		1899-12-31 04:06:06	2.73	-18.67	0.01	7.56	-0.15	-0.65	27.21	0.66	19.41	-20.95	28.62	5.25	8.25		-0.646579
		1899-12-31 04:06:07	2.73	-17.92	-0.01	7.49	-0.16	-0.67	26.98	0.69	20.17	-20.19	27.96	5.35	8.35		-0.632701
		1899-12-31 04:06:07	2.73	-17.17	-0.02	7.43	-0.16	-0.69	26.73	0.71	20.91	-19.45	27.29	5.45	8.45		-0.700049
		1899-12-31 04:06:07	2.73	-16.43	-0.04	7.36	-0.15	-0.71	26.48	0.73	21.65	-18.71	26.62	5.55	8.55		-0.693532
		1899-12-31 04:06:07	2.72	-15.7	-0.05	7.28	-0.15	-0.73	26.22	0.75	22.38	-17.98	25.93	5.65	8.65		-0.724146
		1899-12-31 04:06:07	2.72	-14.97	-0.07	7.21	-0.14	-0.75	25.96	0.77	23.11	-17.25	25.24	5.75	8.75		-0.717001
		1899-12-31 04:06:07	2.71	-14.26	-0.08	7.13	-0.13	-0.77	25.68	0.78	23.83	-16.53	24.54	5.85	8.85		-0.774777
		1899-12-31 04:06:07	2.7	-13.55	-0.09	7.06	-0.11	-0.79	25.4	0.8	24.54	-15.82	23.83	5.95	8.95		-0.777169
		1899-12-31 04:06:07	2.69	-12.85	-0.11	6.98	-0.1	-0.82	25.12	0.82	25.24	-15.12	23.11	6.05	9.05		-0.77963
		1899-12-31 04:06:07	2.68	-12.15	-0.11	6.89	-0.08	-0.85	24.82	0.85	25.93	-14.43	22.38	6.15	9.15		-0.837695
		1899-12-31 04:06:07	2.67	-11.47	-0.12	6.81	-0.06	-0.88	24.51	0.88	26.62	-13.74	21.65	6.25	9.25		-0.855045
		1899-12-31 04:06:08	2.65	-10.79	-0.13	6.72	-0.04	-0.91	24.19	0.91	27.29	-13.07	20.91	6.35	9.35		-0.897365
		1899-12-31 04:06:08	2.64	-10.12	-0.13	6.63	-0.03	-0.95	23.86	0.95	27.96	-12.4	20.17	6.45	9.45		-0.913056
		1899-12-31 04:06:08	2.63	-9.47	-0.13	6.53	-0.01	-0.99	23.51	0.99	28.62	-11.74	19.41	6.55	9.55		-0.969153
		1899-12-31 04:06:08	2.61	-8.82	-0.13	6.43	0.01	-1.04	23.15	1.04	29.27	-11.09	18.66	6.65	9.65		-0.997009
		1899-12-31 04:06:08	2.6	-8.18	-0.13	6.32	0.03	-1.09	22.77	1.09	29.9	-10.46	17.89	6.75	9.75		-1.06859
		1899-12-31 04:06:08	2.59	-7.55	-0.13	6.21	0.04	-1.15	22.37	1.15	30.53	-9.83	17.12	6.85	9.85		-1.10572
		1899-12-31 04:06:08	2.58	-6.94	-0.12	6.1	0.06	-1.2	21.95	1.2	31.15	-9.21	16.34	6.95	9.95		-1.1583
		1899-12-31 04:06:08	2.56	-6.33	-0.12	5.97	0.07	-1.25	21.51	1.26	31.75	-8.61	15.56	7.05	10.05		-1.22958
		1899-12-31 04:06:08	2.55	-5.74	-0.11	5.85	0.08	-1.31	21.05	1.31	32.34	-8.02	14.77	7.15	10.15		-1.28018
		1899-12-31 04:06:08	2.54	-5.16	-0.1	5.71	0.08	-1.36	20.57	1.37	32.92	-7.44	13.98	7.25	10.25		-1.32886
		1899-12-31 04:06:09	2.53	-4.6	-0.09	5.58	0.09	-1.42	20.07	1.42	33.48	-6.88	13.18	7.35	10.35		-1.39991
		1899-12-31 04:06:09	2.52	-4.05	-0.09	5.43	0.09	-1.47	19.56	1.47	34.03	-6.33	12.38	7.45	10.45		-1.41774
		1899-12-31 04:06:09	2.51	-3.51	-0.08	5.28	0.1	-1.52	19.02	1.52	34.57	-5.79	11.57	7.55	10.55		-1.48843
		1899-12-31 04:06:09	2.51	-2.99	-0.07	5.13	0.1	-1.56	18.47	1.56	35.09	-5.27	10.76	7.65	10.65		-1.52982
		1899-12-31 04:06:09	2.5	-2.49	-0.06	4.97	0.1	-1.6	17.9	1.6	35.6	-4.76	9.95	7.75	10.75		-1.56824
		1899-12-31 04:06:09	2.5	-2	-0.05	4.81	0.1	-1.63	17.32	1.64	36.09	-4.27	9.13	7.85	10.85		-1.60837
		1899-12-31 04:06:09	2.49	-1.53	-0.04	4.65	0.1	-1.66	16.73	1.66	36.56	-3.8	8.31	7.95	10.95		-1.64906
		1899-12-31 04:06:09	2.49	-1.07	-0.03	4.48	0.1	-1.68	16.13	1.68	37.02	-3.34	7.49	8.05	11.05		-1.65358
		1899-12-31 04:06:09	2.49	-0.63	-0.02	4.31	0.1	-1.7	15.52	1.7	37.45	-2.91	6.67	8.15	11.15		-1.73221
		1899-12-31 04:06:09	2.48	-0.21	-0.01	4.14	0.1	-1.71	14.91	1.71	37.88	-2.48	5.84	8.25	11.25		-1.66544
		1899-12-31 04:06:10	2.48	0.2	0	3.97	0.1	-1.71	14.29	1.71	38.28	-2.08	5.01	8.35	11.35		-1.74614
		1899-12-31 04:06:10	2.48	0.59	0.01	3.8	0.1	-1.71	13.68	1.72	38.67	-1.69	4.18	8.45	11.45		-1.68781
		1899-12-31 04:06:10	2.49	0.96	0.02	3.63	0.09	-1.71	13.06	1.72	39.04	-1.32	3.34	8.55	11.55		-1.72869
		1899-12-31 04:06:10	2.49	1.31	0.03	3.46	0.09	-1.71	12.44	1.71	39.4	-0.96	2.51	8.65	11.65		-1.69432
		1899-12-31 04:06:10	2.49	1.65	0.04	3.29	0.09	-1.71	11.83	1.71	39.73	-0.63	1.67	8.75	11.75		-1.73082
		1899-12-31 04:06:10	2.5	1.97	0.05	3.11	0.09	-1.71	11.21	1.71	40.05	-0.31	0.84	8.85	11.85		-1.72222
		1899-12-31 04:06:10	2.5	2.27	0.06	2.94	0.09	-1.71	10.6	1.71	40.36	0	0	8.95	11.95		-1.65573
14	1899-12-31 04:09:53	GlobalTime	X[m]	Y[m]	Vx[m/s]	Vy[m/s]	Ax[m/s2]	Ay[m/s2]	Speed[km/h]	Acceleration[m/s2]	Space[m]				3
		1899-12-31 04:09:51	2.63	-38.52	0.27	7.18	-0.03	-0.09	25.88	0.1	0	-41.98	41.98	-2	1							25.88	-41.98
		1899-12-31 04:09:51	2.65	-37.8	0.27	7.17	-0.04	-0.12	25.84	0.13	0.72	-41.26	41.73	-1.9	1.1		-0.110854
		1899-12-31 04:09:51	2.68	-37.08	0.26	7.16	-0.04	-0.15	25.8	0.16	1.44	-40.54	41.46	-1.8	1.2		-0.110682
		1899-12-31 04:09:52	2.71	-36.37	0.26	7.14	-0.05	-0.18	25.74	0.19	2.15	-39.83	41.18	-1.7	1.3		-0.168036
		1899-12-31 04:09:52	2.73	-35.65	0.25	7.13	-0.06	-0.21	25.67	0.22	2.87	-39.11	40.9	-1.6	1.4		-0.192832
		1899-12-31 04:09:52	2.76	-34.94	0.25	7.1	-0.07	-0.23	25.59	0.24	3.58	-38.4	40.61	-1.5	1.5		-0.222831
		1899-12-31 04:09:52	2.78	-34.23	0.24	7.08	-0.08	-0.26	25.5	0.27	4.29	-37.69	40.3	-1.4	1.6		-0.249853
		1899-12-31 04:09:52	2.81	-33.53	0.23	7.05	-0.09	-0.28	25.41	0.29	4.99	-36.99	39.99	-1.3	1.7		-0.25253
		1899-12-31 04:09:52	2.83	-32.82	0.22	7.03	-0.1	-0.3	25.3	0.31	5.7	-36.28	39.67	-1.2	1.8		-0.303105
		1899-12-31 04:09:52	2.85	-32.12	0.21	7	-0.1	-0.31	25.19	0.33	6.4	-35.58	39.34	-1.1	1.9		-0.306101
		1899-12-31 04:09:52	2.87	-31.42	0.2	6.96	-0.11	-0.32	25.08	0.34	7.1	-34.88	39.01	-1	2		-0.304767
		1899-12-31 04:09:52	2.89	-30.73	0.19	6.93	-0.12	-0.33	24.96	0.35	7.79	-34.19	38.66	-0.9	2.1		-0.335749
		1899-12-31 04:09:52	2.91	-30.04	0.18	6.9	-0.12	-0.33	24.84	0.36	8.48	-33.5	38.31	-0.8	2.2		-0.334138
		1899-12-31 04:09:53	2.93	-29.35	0.16	6.86	-0.13	-0.34	24.72	0.36	9.17	-32.81	37.95	-0.7	2.3		-0.332528
		1899-12-31 04:09:53	2.94	-28.66	0.15	6.83	-0.13	-0.33	24.6	0.36	9.86	-32.12	37.58	-0.6	2.4		-0.330918
		1899-12-31 04:09:53	2.96	-27.98	0.14	6.8	-0.13	-0.33	24.48	0.36	10.54	-31.44	37.21	-0.5	2.5		-0.33415
		1899-12-31 04:09:53	2.97	-27.3	0.13	6.76	-0.13	-0.33	24.36	0.36	11.22	-30.76	36.83	-0.4	2.6		-0.332516
		1899-12-31 04:09:53	2.98	-26.63	0.11	6.73	-0.13	-0.33	24.24	0.35	11.89	-30.09	36.44	-0.3	2.7		-0.335821
		1899-12-31 04:09:53	2.99	-25.96	0.1	6.7	-0.13	-0.33	24.12	0.35	12.56	-29.42	36.05	-0.2	2.8		-0.334163
		1899-12-31 04:09:53	3	-25.29	0.09	6.67	-0.12	-0.33	24	0.35	13.23	-28.75	35.64	-0.1	2.9		-0.332504
		1899-12-31 04:09:53	3.01	-24.62	0.08	6.63	-0.11	-0.33	23.88	0.35	13.9	-28.08	35.23	0	3		-0.330846							23.88	-28.08
		1899-12-31 04:09:53	3.02	-23.96	0.06	6.6	-0.11	-0.34	23.76	0.35	14.56	-27.42	34.82	0.1	3.1		-0.334175
		1899-12-31 04:09:53	3.02	-23.3	0.05	6.57	-0.1	-0.34	23.64	0.35	15.22	-26.76	34.39	0.2	3.2		-0.332492
		1899-12-31 04:09:54	3.03	-22.65	0.04	6.53	-0.09	-0.34	23.52	0.36	15.87	-26.11	33.96	0.3	3.3		-0.335897
		1899-12-31 04:09:54	3.03	-22	0.04	6.5	-0.08	-0.35	23.39	0.36	16.52	-25.46	33.51	0.4	3.4		-0.36196
		1899-12-31 04:09:54	3.03	-21.35	0.03	6.46	-0.07	-0.36	23.26	0.37	17.17	-24.81	33.06	0.5	3.5		-0.359954
		1899-12-31 04:09:54	3.04	-20.71	0.02	6.43	-0.06	-0.37	23.13	0.37	17.82	-24.16	32.6	0.6	3.6		-0.357948
		1899-12-31 04:09:54	3.04	-20.06	0.02	6.39	-0.05	-0.38	23	0.38	18.46	-23.52	32.13	0.7	3.7		-0.361503
		1899-12-31 04:09:54	3.04	-19.43	0.01	6.35	-0.04	-0.39	22.86	0.39	19.09	-22.89	31.66	0.8	3.8		-0.393176
		1899-12-31 04:09:54	3.04	-18.79	0.01	6.31	-0.03	-0.4	22.72	0.41	19.73	-22.25	31.17	0.9	3.9		-0.384669
		1899-12-31 04:09:54	3.04	-18.17	0.01	6.27	-0.02	-0.42	22.57	0.42	20.36	-21.62	30.67	1	4		-0.416024
		1899-12-31 04:09:54	3.04	-17.54	0.01	6.23	-0.01	-0.44	22.42	0.44	20.98	-21	30.16	1.1	4.1		-0.419934
		1899-12-31 04:09:54	3.04	-16.92	0	6.18	0	-0.46	22.26	0.46	21.6	-20.38	29.65	1.2	4.2		-0.444843
		1899-12-31 04:09:55	3.04	-16.3	0	6.13	0.01	-0.49	22.09	0.49	22.22	-19.76	29.12	1.3	4.3		-0.469154		22.09	-19.76	-1.9
		1899-12-31 04:09:55	3.04	-15.69	0.01	6.08	0.01	-0.53	21.9	0.53	22.83	-19.15	28.59	1.4	4.4		-0.528619
		1899-12-31 04:09:55	3.04	-15.09	0.01	6.03	0.02	-0.56	21.71	0.56	23.43	-18.55	28.05	1.5	4.5		-0.532787
		1899-12-31 04:09:55	3.05	-14.49	0.01	5.97	0.03	-0.6	21.51	0.6	24.04	-17.94	27.5	1.6	4.6		-0.546701
		1899-12-31 04:09:55	3.05	-13.89	0.01	5.91	0.03	-0.64	21.29	0.64	24.63	-17.35	26.94	1.7	4.7		-0.615715
		1899-12-31 04:09:55	3.05	-13.31	0.02	5.85	0.04	-0.68	21.05	0.68	25.22	-16.76	26.37	1.8	4.8		-0.66447
		1899-12-31 04:09:55	3.05	-12.72	0.02	5.78	0.04	-0.72	20.8	0.72	25.8	-16.18	25.8	1.9	4.9		-0.695941
		1899-12-31 04:09:55	3.05	-12.15	0.02	5.71	0.04	-0.76	20.54	0.76	26.37	-15.61	25.22	2	5		-0.727502
		1899-12-31 04:09:55	3.05	-11.58	0.03	5.63	0.04	-0.79	20.26	0.79	26.94	-15.04	24.63	2.1	5.1		-0.773229
		1899-12-31 04:09:55	3.06	-11.02	0.03	5.55	0.04	-0.83	19.97	0.83	27.5	-14.48	24.04	2.2	5.2		-0.803757
		1899-12-31 04:09:56	3.06	-10.47	0.04	5.46	0.04	-0.86	19.67	0.86	28.05	-13.93	23.43	2.3	5.3		-0.834175
		1899-12-31 04:09:56	3.06	-9.93	0.04	5.38	0.04	-0.88	19.36	0.88	28.59	-13.39	22.83	2.4	5.4		-0.864433
		1899-12-31 04:09:56	3.07	-9.4	0.04	5.29	0.03	-0.9	19.04	0.9	29.12	-12.86	22.22	2.5	5.5		-0.894479
		1899-12-31 04:09:56	3.07	-8.87	0.05	5.2	0.02	-0.91	18.72	0.91	29.65	-12.33	21.6	2.6	5.6		-0.879571
		1899-12-31 04:09:56	3.08	-8.36	0.05	5.11	0.01	-0.92	18.39	0.92	30.16	-11.82	20.98	2.7	5.7		-0.926403
		1899-12-31 04:09:56	3.08	-7.85	0.05	5.01	0	-0.93	18.05	0.93	30.67	-11.31	20.36	2.8	5.8		-0.937243
		1899-12-31 04:09:56	3.09	-7.36	0.05	4.92	-0.02	-0.93	17.72	0.93	31.17	-10.81	19.73	2.9	5.9		-0.91081
		1899-12-31 04:09:56	3.09	-6.87	0.05	4.83	-0.03	-0.92	17.39	0.92	31.66	-10.32	19.09	3	6		-0.91225
		1899-12-31 04:09:56	3.1	-6.39	0.04	4.74	-0.05	-0.91	17.05	0.91	32.13	-9.85	18.46	3.1	6.1		-0.96119
		1899-12-31 04:09:56	3.1	-5.92	0.04	4.65	-0.06	-0.9	16.73	0.9	32.6	-9.38	17.82	3.2	6.2		-0.887313
		1899-12-31 04:09:57	3.1	-5.46	0.03	4.56	-0.07	-0.88	16.4	0.89	33.06	-8.92	17.17	3.3	6.3		-0.916943
		1899-12-31 04:09:57	3.11	-5.01	0.02	4.47	-0.08	-0.87	16.09	0.87	33.51	-8.47	16.52	3.4	6.4		-0.863503
		1899-12-31 04:09:57	3.11	-4.57	0.01	4.38	-0.09	-0.84	15.78	0.85	33.96	-8.02	15.87	3.5	6.5		-0.847025
		1899-12-31 04:09:57	3.11	-4.13	0	4.3	-0.1	-0.82	15.48	0.83	34.39	-7.59	15.22	3.6	6.6		-0.841408
		1899-12-31 04:09:57	3.11	-3.71	-0.01	4.22	-0.1	-0.8	15.18	0.81	34.82	-7.16	14.56	3.7	6.7		-0.825258
		1899-12-31 04:09:57	3.11	-3.29	-0.02	4.14	-0.1	-0.78	14.9	0.78	35.23	-6.75	13.9	3.8	6.8		-0.792532
		1899-12-31 04:09:57	3.11	-2.88	-0.02	4.06	-0.09	-0.75	14.62	0.76	35.64	-6.34	13.23	3.9	6.9		-0.777778
		1899-12-31 04:09:57	3.1	-2.48	-0.03	3.99	-0.09	-0.74	14.35	0.74	36.05	-5.93	12.56	4	7		-0.736026
		1899-12-31 04:09:57	3.1	-2.08	-0.04	3.91	-0.08	-0.72	14.09	0.72	36.44	-5.54	11.89	4.1	7.1		-0.731481
		1899-12-31 04:09:57	3.1	-1.69	-0.05	3.84	-0.07	-0.71	13.83	0.71	36.83	-5.15	11.22	4.2	7.2		-0.718107
		1899-12-31 04:09:58	3.09	-1.31	-0.06	3.77	-0.06	-0.71	13.58	0.71	37.21	-4.77	10.54	4.3	7.3		-0.695714
		1899-12-31 04:09:58	3.08	-0.94	-0.06	3.7	-0.05	-0.71	13.32	0.71	37.58	-4.4	9.86	4.4	7.4		-0.729271
		1899-12-31 04:09:58	3.08	-0.57	-0.07	3.63	-0.04	-0.72	13.07	0.72	37.95	-4.03	9.17	4.5	7.5		-0.687928
		1899-12-31 04:09:58	3.07	-0.21	-0.07	3.56	-0.03	-0.74	12.81	0.74	38.31	-3.67	8.48	4.6	7.6		-0.721108
		1899-12-31 04:09:58	3.06	0.14	-0.07	3.48	-0.02	-0.76	12.54	0.76	38.66	-3.32	7.79	4.7	7.7		-0.754464
		1899-12-31 04:09:58	3.06	0.48	-0.07	3.4	-0.01	-0.79	12.26	0.79	39.01	-2.97	7.1	4.8	7.8		-0.765432
		1899-12-31 04:09:58	3.05	0.82	-0.07	3.32	0	-0.82	11.97	0.82	39.34	-2.64	6.4	4.9	7.9		-0.82149
		1899-12-31 04:09:58	3.04	1.15	-0.07	3.24	0.01	-0.84	11.67	0.84	39.67	-2.31	5.7	5	8		-0.829125
		1899-12-31 04:09:58	3.04	1.47	-0.07	3.16	0.01	-0.87	11.37	0.87	39.99	-1.99	4.99	5.1	8.1		-0.833333
		1899-12-31 04:09:58	3.03	1.78	-0.07	3.07	0.02	-0.88	11.05	0.88	40.3	-1.68	4.29	5.2	8.2		-0.892871
		1899-12-31 04:09:59	3.02	2.08	-0.07	2.98	0.02	-0.9	10.73	0.9	40.61	-1.37	3.58	5.3	8.3		-0.867384
		1899-12-31 04:09:59	3.01	2.38	-0.07	2.89	0.02	-0.9	10.41	0.9	40.9	-1.08	2.87	5.4	8.4		-0.899957
		1899-12-31 04:09:59	3.01	2.66	-0.07	2.8	0.02	-0.91	10.08	0.91	41.18	-0.8	2.15	5.5	8.5		-0.931672
		1899-12-31 04:09:59	3	2.94	-0.06	2.71	0.02	-0.91	9.76	0.91	41.46	-0.52	1.44	5.6	8.6		-0.87478
		1899-12-31 04:09:59	2.99	3.2	-0.06	2.62	0.02	-0.91	9.43	0.91	41.73	-0.25	0.72	5.7	8.7		-0.904878
		1899-12-31 04:09:59	2.99	3.46	-0.06	2.53	0.02	-0.91	9.1	0.91	41.98	0	0	5.8	8.8		-0.943657
15	1899-12-31 04:40:25	GlobalTime	X[m]	Y[m]	Vx[m/s]	Vy[m/s]	Ax[m/s2]	Ay[m/s2]	Speed[km/h]	Acceleration[m/s2]	Space[m]				3
		1899-12-31 04:40:19	3.11	-37.03	0.03	3.59	-0.01	-0.02	12.92	0.02	0	-35.69	35.69	-6.12	-3.12
		1899-12-31 04:40:19	3.11	-36.67	0.02	3.59	-0.01	-0.02	12.92	0.02	0.36	-35.33	35.43	-6.02	-3.02		0
		1899-12-31 04:40:19	3.11	-36.31	0.02	3.59	-0.01	-0.02	12.91	0.03	0.72	-34.97	35.17	-5.92	-2.92		-0.0276813
		1899-12-31 04:40:19	3.11	-35.96	0.02	3.58	-0.01	-0.03	12.9	0.03	1.08	-34.61	34.91	-5.82	-2.82		-0.0276599
		1899-12-31 04:40:19	3.12	-35.6	0.02	3.58	-0.01	-0.03	12.89	0.03	1.43	-34.26	34.65	-5.72	-2.72		-0.0284281
		1899-12-31 04:40:20	3.12	-35.24	0.02	3.58	-0.01	-0.03	12.88	0.03	1.79	-33.9	34.38	-5.62	-2.62		-0.027617
		1899-12-31 04:40:20	3.12	-34.88	0.02	3.57	-0.01	-0.03	12.87	0.04	2.15	-33.54	34.11	-5.52	-2.52		-0.0275956
		1899-12-31 04:40:20	3.12	-34.53	0.02	3.57	-0.01	-0.03	12.85	0.04	2.51	-33.18	33.84	-5.42	-2.42		-0.0551269
		1899-12-31 04:40:20	3.12	-34.17	0.02	3.57	-0.01	-0.03	12.84	0.04	2.86	-32.83	33.56	-5.32	-2.32		-0.0283179
		1899-12-31 04:40:20	3.13	-33.81	0.02	3.56	-0.01	-0.03	12.83	0.04	3.22	-32.47	33.28	-5.22	-2.22		-0.0275099
		1899-12-31 04:40:20	3.13	-33.46	0.01	3.56	-0.01	-0.03	12.82	0.03	3.58	-32.11	33	-5.12	-2.12		-0.0274884
		1899-12-31 04:40:20	3.13	-33.1	0.01	3.56	-0.01	-0.03	12.81	0.03	3.93	-31.76	32.71	-5.02	-2.02		-0.0282518
		1899-12-31 04:40:20	3.13	-32.74	0.01	3.55	-0.01	-0.03	12.8	0.03	4.29	-31.4	32.42	-4.92	-1.92		-0.0274456
		1899-12-31 04:40:20	3.13	-32.39	0.01	3.55	-0.01	-0.03	12.79	0.03	4.64	-31.05	32.12	-4.82	-1.82		-0.0282077
		1899-12-31 04:40:20	3.13	-32.03	0.01	3.55	-0.01	-0.03	12.77	0.04	5	-30.69	31.83	-4.72	-1.72		-0.054784
		1899-12-31 04:40:21	3.13	-31.68	0.01	3.54	-0.01	-0.04	12.76	0.04	5.35	-30.34	31.52	-4.62	-1.62		-0.0281415
		1899-12-31 04:40:21	3.13	-31.33	0.01	3.54	-0.01	-0.04	12.75	0.04	5.71	-29.98	31.22	-4.52	-1.52		-0.0273384
		1899-12-31 04:40:21	3.13	-30.97	0.01	3.54	-0.01	-0.04	12.73	0.04	6.06	-29.63	30.91	-4.42	-1.42		-0.0561728
		1899-12-31 04:40:21	3.13	-30.62	0	3.53	-0.01	-0.05	12.72	0.05	6.41	-29.28	30.6	-4.32	-1.32		-0.0280534
		1899-12-31 04:40:21	3.13	-30.26	0	3.53	0	-0.05	12.7	0.05	6.77	-28.92	30.29	-4.22	-1.22		-0.0544839
		1899-12-31 04:40:21	3.13	-29.91	0	3.52	0	-0.06	12.68	0.06	7.12	-28.57	29.97	-4.12	-1.12		-0.0559524
		1899-12-31 04:40:21	3.13	-29.56	0	3.52	0	-0.06	12.66	0.06	7.47	-28.22	29.66	-4.02	-1.02		-0.0558642
		1899-12-31 04:40:21	3.14	-29.21	0	3.51	0.01	-0.06	12.64	0.06	7.82	-27.87	29.34	-3.92	-0.92		-0.055776
		1899-12-31 04:40:21	3.14	-28.86	0.01	3.5	0.01	-0.07	12.62	0.07	8.17	-27.52	29.02	-3.82	-0.82		-0.0556878
		1899-12-31 04:40:21	3.14	-28.51	0.01	3.5	0.02	-0.07	12.59	0.07	8.52	-27.17	28.7	-3.72	-0.72		-0.0833664
		1899-12-31 04:40:22	3.14	-28.16	0.01	3.49	0.02	-0.07	12.57	0.07	8.87	-26.82	28.38	-3.62	-0.62		-0.0554674
		1899-12-31 04:40:22	3.14	-27.81	0.01	3.48	0.03	-0.07	12.54	0.07	9.22	-26.47	28.06	-3.52	-0.52		-0.0830357
		1899-12-31 04:40:22	3.14	-27.46	0.01	3.48	0.03	-0.07	12.52	0.07	9.57	-26.12	27.74	-3.42	-0.42		-0.0552469
		1899-12-31 04:40:22	3.14	-27.11	0.02	3.47	0.03	-0.07	12.5	0.07	9.92	-25.77	27.43	-3.32	-0.32		-0.0551587
		1899-12-31 04:40:22	3.14	-26.77	0.02	3.46	0.04	-0.07	12.47	0.08	10.26	-25.43	27.11	-3.22	-0.22		-0.0850014
		1899-12-31 04:40:22	3.14	-26.42	0.02	3.46	0.04	-0.07	12.45	0.08	10.61	-25.08	26.79	-3.12	-0.12		-0.0549383
		1899-12-31 04:40:22	3.15	-26.08	0.03	3.45	0.04	-0.07	12.42	0.08	10.96	-24.73	26.48	-3.02	-0.02		-0.0822421					12.42	-24.73
		1899-12-31 04:40:22	3.15	-25.73	0.03	3.44	0.04	-0.08	12.4	0.09	11.3	-24.39	26.16	-2.92	0.08		-0.0563272
		1899-12-31 04:40:22	3.15	-25.39	0.04	3.44	0.04	-0.08	12.37	0.09	11.65	-24.04	25.85	-2.82	0.18		-0.0819114
		1899-12-31 04:40:22	3.16	-25.04	0.04	3.43	0.04	-0.09	12.34	0.1	11.99	-23.7	25.54	-2.72	0.28		-0.0841163
		1899-12-31 04:40:23	3.16	-24.7	0.04	3.42	0.03	-0.1	12.3	0.1	12.33	-23.36	25.23	-2.62	0.38		-0.111837
		1899-12-31 04:40:23	3.17	-24.36	0.05	3.41	0.03	-0.1	12.27	0.11	12.67	-23.02	24.92	-2.52	0.48		-0.0836397
		1899-12-31 04:40:23	3.17	-24.02	0.05	3.4	0.02	-0.11	12.23	0.11	13.01	-22.68	24.61	-2.42	0.58		-0.111202
		1899-12-31 04:40:23	3.18	-23.68	0.05	3.39	0.01	-0.11	12.19	0.11	13.35	-22.34	24.3	-2.32	0.68		-0.110839
		1899-12-31 04:40:23	3.18	-23.34	0.05	3.37	0	-0.12	12.15	0.12	13.69	-22	23.99	-2.22	0.78		-0.110476
		1899-12-31 04:40:23	3.19	-23.01	0.05	3.36	-0.01	-0.12	12.1	0.12	14.03	-21.66	23.68	-2.12	0.88		-0.137584
		1899-12-31 04:40:23	3.19	-22.67	0.05	3.35	-0.03	-0.12	12.06	0.12	14.36	-21.33	23.37	-2.02	0.98		-0.112982
		1899-12-31 04:40:23	3.2	-22.34	0.05	3.34	-0.04	-0.12	12.02	0.13	14.7	-20.99	23.06	-1.92	1.08		-0.109296
		1899-12-31 04:40:23	3.2	-22	0.04	3.33	-0.05	-0.12	11.97	0.13	15.03	-20.66	22.75	-1.82	1.18		-0.140233
		1899-12-31 04:40:23	3.2	-21.67	0.04	3.31	-0.06	-0.12	11.93	0.13	15.36	-20.33	22.44	-1.72	1.28		-0.111766
		1899-12-31 04:40:24	3.21	-21.34	0.03	3.3	-0.07	-0.11	11.89	0.13	15.69	-20	22.12	-1.62	1.38		-0.111392
		1899-12-31 04:40:24	3.21	-21.01	0.02	3.29	-0.08	-0.11	11.85	0.13	16.02	-19.67	21.81	-1.52	1.48		-0.111018
		1899-12-31 04:40:24	3.21	-20.68	0.02	3.28	-0.08	-0.1	11.81	0.13	16.35	-19.34	21.5	-1.42	1.58		-0.110643
		1899-12-31 04:40:24	3.21	-20.36	0.01	3.27	-0.08	-0.09	11.78	0.13	16.68	-19.01	21.18	-1.32	1.68		-0.0827371
		1899-12-31 04:40:24	3.21	-20.03	0	3.26	-0.09	-0.09	11.74	0.12	17	-18.69	20.86	-1.22	1.78		-0.113426
		1899-12-31 04:40:24	3.21	-19.7	-0.01	3.25	-0.09	-0.08	11.71	0.12	17.33	-18.36	20.55	-1.12	1.88		-0.0822461
		1899-12-31 04:40:24	3.21	-19.38	-0.02	3.25	-0.08	-0.08	11.68	0.11	17.66	-18.03	20.23	-1.02	1.98		-0.0820356
		1899-12-31 04:40:24	3.21	-19.05	-0.03	3.24	-0.08	-0.07	11.66	0.1	17.98	-17.71	19.91	-0.92	2.08		-0.0562789
		1899-12-31 04:40:24	3.21	-18.73	-0.03	3.23	-0.07	-0.07	11.63	0.1	18.3	-17.39	19.59	-0.82	2.18		-0.0842376
		1899-12-31 04:40:24	3.2	-18.41	-0.04	3.22	-0.06	-0.07	11.61	0.09	18.63	-17.06	19.27	-0.72	2.28		-0.0543397
		1899-12-31 04:40:25	3.2	-18.09	-0.04	3.22	-0.04	-0.07	11.58	0.08	18.95	-16.74	18.95	-0.62	2.38		-0.0838759
		1899-12-31 04:40:25	3.2	-17.76	-0.05	3.21	-0.03	-0.07	11.56	0.08	19.27	-16.42	18.63	-0.52	2.48		-0.0557967
		1899-12-31 04:40:25	3.19	-17.44	-0.05	3.2	-0.01	-0.08	11.53	0.08	19.59	-16.1	18.3	-0.42	2.58		-0.0835142
		1899-12-31 04:40:25	3.19	-17.12	-0.05	3.2	0	-0.08	11.5	0.08	19.91	-15.78	17.98	-0.32	2.68		-0.0832972
		1899-12-31 04:40:25	3.18	-16.8	-0.05	3.19	0.02	-0.09	11.47	0.09	20.23	-15.46	17.66	-0.22	2.78		-0.0830802
		1899-12-31 04:40:25	3.18	-16.49	-0.05	3.18	0.04	-0.09	11.44	0.1	20.55	-15.14	17.33	-0.12	2.88		-0.0828631
		1899-12-31 04:40:25	3.17	-16.17	-0.04	3.17	0.05	-0.1	11.41	0.11	20.86	-14.83	17	-0.02	2.98		-0.0853121							11.41	-14.83
		1899-12-31 04:40:25	3.17	-15.85	-0.04	3.16	0.07	-0.1	11.37	0.12	21.18	-14.51	16.68	0.08	3.08		-0.109857
		1899-12-31 04:40:25	3.16	-15.54	-0.03	3.15	0.08	-0.1	11.34	0.12	21.5	-14.19	16.35	0.18	3.18		-0.0821398
		1899-12-31 04:40:25	3.16	-15.22	-0.02	3.14	0.09	-0.1	11.3	0.13	21.81	-13.88	16.02	0.28	3.28		-0.112704
		1899-12-31 04:40:26	3.16	-14.91	-0.01	3.13	0.09	-0.09	11.27	0.13	22.12	-13.57	15.69	0.38	3.38		-0.0842667
		1899-12-31 04:40:26	3.16	-14.6	0	3.12	0.1	-0.08	11.24	0.13	22.44	-13.25	15.36	0.48	3.48		-0.0814164
		1899-12-31 04:40:26	3.16	-14.28	0.01	3.11	0.1	-0.07	11.21	0.13	22.75	-12.94	15.03	0.58	3.58		-0.0838187
		1899-12-31 04:40:26	3.16	-13.97	0.02	3.11	0.1	-0.06	11.18	0.12	23.06	-12.63	14.7	0.68	3.68		-0.0835947
		1899-12-31 04:40:26	3.16	-13.66	0.03	3.1	0.1	-0.05	11.16	0.11	23.37	-12.32	14.36	0.78	3.78		-0.0556053
		1899-12-31 04:40:26	3.16	-13.35	0.04	3.1	0.09	-0.03	11.15	0.1	23.68	-12.01	14.03	0.88	3.88		-0.0277653
		1899-12-31 04:40:26	3.17	-13.04	0.05	3.09	0.09	-0.01	11.14	0.09	23.99	-11.7	13.69	0.98	3.98		-0.0277404
		1899-12-31 04:40:26	3.17	-12.73	0.05	3.09	0.08	0.01	11.14	0.08	24.3	-11.39	13.35	1.08	4.08		0
		1899-12-31 04:40:26	3.18	-12.43	0.06	3.1	0.06	0.03	11.15	0.07	24.61	-11.08	13.01	1.18	4.18		0.0277404
		1899-12-31 04:40:26	3.19	-12.12	0.07	3.1	0.05	0.05	11.16	0.07	24.92	-10.77	12.67	1.28	4.28		0.0277653
		1899-12-31 04:40:27	3.19	-11.81	0.07	3.1	0.04	0.07	11.18	0.08	25.23	-10.46	12.33	1.38	4.38		0.0556053
		1899-12-31 04:40:27	3.2	-11.49	0.07	3.11	0.02	0.09	11.21	0.09	25.54	-10.15	11.99	1.48	4.48		0.0835947
		1899-12-31 04:40:27	3.21	-11.18	0.08	3.12	0	0.1	11.24	0.1	25.85	-9.84	11.65	1.58	4.58		0.0838187
		1899-12-31 04:40:27	3.22	-10.87	0.08	3.13	-0.01	0.11	11.28	0.11	26.16	-9.53	11.3	1.68	4.68		0.112107
		1899-12-31 04:40:27	3.22	-10.56	0.07	3.14	-0.03	0.11	11.31	0.11	26.48	-9.21	10.96	1.78	4.78		0.0817057
		1899-12-31 04:40:27	3.23	-10.24	0.07	3.15	-0.04	0.11	11.35	0.12	26.79	-8.9	10.61	1.88	4.88		0.112804
		1899-12-31 04:40:27	3.24	-9.93	0.07	3.16	-0.06	0.1	11.39	0.12	27.11	-8.58	10.26	1.98	4.98		0.109664
		1899-12-31 04:40:27	3.24	-9.61	0.06	3.17	-0.08	0.09	11.43	0.12	27.43	-8.26	9.92	2.08	5.08		0.11005		11.43	-8.26	2.08
		1899-12-31 04:40:27	3.25	-9.29	0.05	3.18	-0.09	0.07	11.46	0.12	27.74	-7.95	9.57	2.18	5.18		0.0854615
		1899-12-31 04:40:27	3.25	-8.97	0.04	3.19	-0.1	0.05	11.48	0.11	28.06	-7.63	9.22	2.28	5.28		0.0553144
		1899-12-31 04:40:28	3.26	-8.65	0.03	3.19	-0.11	0.02	11.5	0.12	28.38	-7.31	8.87	2.38	5.38		0.0554109
		1899-12-31 04:40:28	3.26	-8.33	0.02	3.19	-0.12	-0.01	11.5	0.13	28.7	-6.99	8.52	2.48	5.48		0
		1899-12-31 04:40:28	3.26	-8.01	0.01	3.19	-0.13	-0.05	11.49	0.14	29.02	-6.67	8.17	2.58	5.58		-0.0277175
		1899-12-31 04:40:28	3.26	-7.7	-0.01	3.19	-0.14	-0.09	11.47	0.17	29.34	-6.35	7.82	2.68	5.68		-0.0553627
		1899-12-31 04:40:28	3.26	-7.38	-0.02	3.17	-0.14	-0.13	11.43	0.19	29.66	-6.03	7.47	2.78	5.78		-0.110436
		1899-12-31 04:40:28	3.26	-7.06	-0.04	3.16	-0.14	-0.18	11.38	0.23	29.97	-5.72	7.12	2.88	5.88		-0.141938
		1899-12-31 04:40:28	3.25	-6.75	-0.05	3.14	-0.14	-0.22	11.31	0.26	30.29	-5.4	6.77	2.98	5.98		-0.191491
		1899-12-31 04:40:28	3.25	-6.43	-0.06	3.12	-0.14	-0.26	11.23	0.29	30.6	-5.09	6.41	3.08	6.08		-0.224413
		1899-12-31 04:40:28	3.24	-6.12	-0.08	3.09	-0.13	-0.29	11.13	0.32	30.91	-4.78	6.06	3.18	6.18		-0.278276
		1899-12-31 04:40:28	3.23	-5.81	-0.09	3.06	-0.12	-0.32	11.02	0.34	31.22	-4.47	5.71	3.28	6.28		-0.303228
		1899-12-31 04:40:29	3.22	-5.51	-0.1	3.03	-0.12	-0.34	10.91	0.36	31.52	-4.17	5.35	3.38	6.38		-0.310224
		1899-12-31 04:40:29	3.21	-5.21	-0.11	2.99	-0.11	-0.36	10.78	0.37	31.83	-3.86	5	3.48	6.48		-0.350918
		1899-12-31 04:40:29	3.2	-4.91	-0.12	2.96	-0.1	-0.36	10.66	0.38	32.12	-3.57	4.64	3.58	6.58		-0.342273
		1899-12-31 04:40:29	3.19	-4.62	-0.13	2.92	-0.1	-0.36	10.53	0.38	32.42	-3.27	4.29	3.68	6.68		-0.354257
		1899-12-31 04:40:29	3.17	-4.33	-0.14	2.88	-0.09	-0.36	10.4	0.37	32.71	-2.98	3.93	3.78	6.78		-0.361976
		1899-12-31 04:40:29	3.16	-4.04	-0.15	2.85	-0.09	-0.35	10.27	0.37	33	-2.69	3.58	3.88	6.88		-0.357479
		1899-12-31 04:40:29	3.14	-3.76	-0.16	2.81	-0.09	-0.35	10.15	0.36	33.28	-2.41	3.22	3.98	6.98		-0.337632
		1899-12-31 04:40:29	3.13	-3.48	-0.17	2.78	-0.09	-0.34	10.03	0.35	33.56	-2.13	2.86	4.08	7.08		-0.333664
		1899-12-31 04:40:29	3.11	-3.2	-0.18	2.75	-0.09	-0.33	9.91	0.34	33.84	-1.85	2.51	4.18	7.18		-0.329696
		1899-12-31 04:40:29	3.09	-2.93	-0.19	2.71	-0.09	-0.32	9.79	0.33	34.11	-1.58	2.15	4.28	7.28		-0.337791
		1899-12-31 04:40:30	3.07	-2.66	-0.2	2.68	-0.09	-0.31	9.68	0.32	34.38	-1.31	1.79	4.38	7.38		-0.306027
		1899-12-31 04:40:30	3.05	-2.39	-0.21	2.65	-0.09	-0.31	9.58	0.32	34.65	-1.04	1.43	4.48	7.48		-0.275206
		1899-12-31 04:40:30	3.03	-2.13	-0.22	2.62	-0.09	-0.3	9.47	0.32	34.91	-0.78	1.08	4.58	7.58		-0.310942
		1899-12-31 04:40:30	3.01	-1.87	-0.23	2.59	-0.09	-0.3	9.36	0.32	35.17	-0.52	0.72	4.68	7.68		-0.307351
		1899-12-31 04:40:30	2.98	-1.61	-0.23	2.56	-0.09	-0.3	9.26	0.32	35.43	-0.26	0.36	4.78	7.78		-0.276294
		1899-12-31 04:40:30	2.96	-1.36	-0.24	2.53	-0.09	-0.3	9.15	0.32	35.69	0	0	4.88	7.88		-0.300496
16	1899-12-31 04:40:25	GlobalTime	X[m]	Y[m]	Vx[m/s]	Vy[m/s]	Ax[m/s2]	Ay[m/s2]	Speed[km/h]	Acceleration[m/s2]	Space[m]				3
		1899-12-31 04:40:22	1.53	-37.22	-0.08	3.57	-0.01	0.04	12.85	0.04	0	-35.27	35.27	-3.4	-0.4
		1899-12-31 04:40:22	1.52	-36.86	-0.08	3.57	-0.01	0.05	12.86	0.05	0.36	-34.91	34.93	-3.3	-0.3		0.0275527
		1899-12-31 04:40:22	1.51	-36.5	-0.09	3.58	-0.01	0.06	12.88	0.06	0.71	-34.56	34.6	-3.2	-0.2		0.056746
		1899-12-31 04:40:22	1.5	-36.14	-0.09	3.58	-0.01	0.07	12.9	0.07	1.07	-34.2	34.26	-3.1	-0.1		0.0552555
		1899-12-31 04:40:22	1.49	-35.79	-0.09	3.59	-0.01	0.08	12.93	0.08	1.43	-33.84	33.93	-3	1.87157e-11		0.083044					12.93	1.43
		1899-12-31 04:40:22	1.48	-35.43	-0.09	3.6	-0.01	0.08	12.96	0.08	1.79	-33.48	33.59	-2.9	0.1		0.0832369
		1899-12-31 04:40:22	1.48	-35.07	-0.09	3.61	-0.01	0.09	12.99	0.09	2.15	-33.12	33.25	-2.8	0.2		0.0834298
		1899-12-31 04:40:23	1.47	-34.71	-0.09	3.61	-0.01	0.09	13.02	0.09	2.51	-32.76	32.91	-2.7	0.3		0.0836227
		1899-12-31 04:40:23	1.46	-34.34	-0.09	3.62	-0.01	0.09	13.05	0.09	2.87	-32.4	32.58	-2.6	0.4		0.0838156
		1899-12-31 04:40:23	1.45	-33.98	-0.09	3.63	-0.01	0.09	13.08	0.09	3.24	-32.03	32.24	-2.5	0.5		0.081738
		1899-12-31 04:40:23	1.44	-33.62	-0.09	3.64	-0.01	0.09	13.11	0.09	3.6	-31.67	31.9	-2.4	0.6		0.0842014
		1899-12-31 04:40:23	1.43	-33.25	-0.09	3.65	-0.01	0.08	13.14	0.08	3.97	-31.3	31.56	-2.3	0.7		0.0821134
		1899-12-31 04:40:23	1.42	-32.89	-0.1	3.66	0	0.08	13.17	0.08	4.33	-30.94	31.22	-2.2	0.8		0.0845872
		1899-12-31 04:40:23	1.41	-32.52	-0.1	3.67	0	0.08	13.2	0.08	4.7	-30.57	30.87	-2.1	0.9		0.0824887
		1899-12-31 04:40:23	1.4	-32.15	-0.1	3.67	0.01	0.07	13.23	0.07	5.06	-30.21	30.53	-2	1		0.084973
		1899-12-31 04:40:23	1.39	-31.79	-0.09	3.68	0.01	0.07	13.26	0.07	5.43	-29.84	30.19	-1.9	1.1		0.0828641
		1899-12-31 04:40:23	1.38	-31.42	-0.09	3.69	0.02	0.06	13.28	0.07	5.8	-29.47	29.84	-1.8	1.2		0.055347
		1899-12-31 04:40:24	1.37	-31.05	-0.09	3.69	0.03	0.06	13.3	0.06	6.17	-29.1	29.49	-1.7	1.3		0.0554304
		1899-12-31 04:40:24	1.36	-30.68	-0.09	3.7	0.04	0.05	13.32	0.06	6.54	-28.73	29.14	-1.6	1.4		0.0555138
		1899-12-31 04:40:24	1.36	-30.31	-0.08	3.7	0.04	0.05	13.34	0.07	6.91	-28.36	28.79	-1.5	1.5		0.0555973
		1899-12-31 04:40:24	1.35	-29.94	-0.08	3.71	0.05	0.04	13.36	0.07	7.28	-27.99	28.44	-1.4	1.6		0.0556807
		1899-12-31 04:40:24	1.34	-29.57	-0.07	3.71	0.05	0.04	13.37	0.07	7.65	-27.62	28.08	-1.3	1.7		0.0278716
		1899-12-31 04:40:24	1.33	-29.2	-0.07	3.72	0.06	0.04	13.39	0.07	8.02	-27.25	27.72	-1.2	1.8		0.0558058
		1899-12-31 04:40:24	1.33	-28.82	-0.06	3.72	0.06	0.04	13.4	0.07	8.4	-26.87	27.36	-1.1	1.9		0.0271991
		1899-12-31 04:40:24	1.32	-28.45	-0.06	3.72	0.06	0.04	13.41	0.07	8.77	-26.5	27	-1	2		0.027955
		1899-12-31 04:40:24	1.31	-28.08	-0.05	3.73	0.06	0.04	13.42	0.07	9.14	-26.13	26.64	-0.9	2.1		0.0279759
		1899-12-31 04:40:24	1.31	-27.71	-0.05	3.73	0.06	0.04	13.44	0.07	9.51	-25.76	26.28	-0.8	2.2		0.0560143
		1899-12-31 04:40:25	1.31	-27.33	-0.04	3.74	0.06	0.04	13.45	0.07	9.89	-25.38	25.91	-0.7	2.3		0.0273006
		1899-12-31 04:40:25	1.3	-26.96	-0.03	3.74	0.06	0.04	13.47	0.07	10.26	-25.01	25.54	-0.6	2.4		0.0561395
		1899-12-31 04:40:25	1.3	-26.58	-0.03	3.74	0.05	0.04	13.48	0.07	10.64	-24.63	25.18	-0.5	2.5		0.0273615
		1899-12-31 04:40:25	1.3	-26.21	-0.02	3.75	0.05	0.04	13.5	0.07	11.01	-24.26	24.81	-0.4	2.6		0.0562646
		1899-12-31 04:40:25	1.29	-25.83	-0.02	3.75	0.06	0.04	13.51	0.07	11.39	-23.88	24.44	-0.3	2.7		0.0274224
		1899-12-31 04:40:25	1.29	-25.46	-0.01	3.76	0.06	0.04	13.53	0.07	11.76	-23.51	24.07	-0.2	2.8		0.0563897
		1899-12-31 04:40:25	1.29	-25.08	-0.01	3.76	0.06	0.03	13.54	0.07	12.14	-23.13	23.69	-0.1	2.9		0.0274833
		1899-12-31 04:40:25	1.29	-24.71	0	3.76	0.06	0.03	13.55	0.07	12.51	-22.76	23.32	0	3		0.028247							13.55	-22.76
		1899-12-31 04:40:25	1.29	-24.33	0.01	3.77	0.07	0.02	13.56	0.07	12.89	-22.38	22.95	0.1	3.1		0.027524
		1899-12-31 04:40:25	1.29	-23.95	0.01	3.77	0.07	0	13.56	0.07	13.27	-22	22.58	0.2	3.2		0
		1899-12-31 04:40:26	1.29	-23.58	0.02	3.77	0.07	-0.01	13.56	0.07	13.64	-21.63	22.21	0.3	3.3		0
		1899-12-31 04:40:26	1.3	-23.2	0.03	3.77	0.08	-0.02	13.56	0.08	14.02	-21.25	21.84	0.4	3.4		0
		1899-12-31 04:40:26	1.3	-22.82	0.04	3.76	0.08	-0.04	13.55	0.09	14.4	-20.87	21.46	0.5	3.5		-0.027524
		1899-12-31 04:40:26	1.3	-22.45	0.04	3.76	0.08	-0.05	13.53	0.1	14.77	-20.5	21.09	0.6	3.6		-0.0564731
		1899-12-31 04:40:26	1.31	-22.07	0.05	3.75	0.08	-0.06	13.51	0.1	15.15	-20.12	20.72	0.7	3.7		-0.0549058
		1899-12-31 04:40:26	1.31	-21.7	0.06	3.75	0.08	-0.07	13.49	0.11	15.52	-19.75	20.35	0.8	3.8		-0.0563063
		1899-12-31 04:40:26	1.32	-21.32	0.07	3.74	0.08	-0.08	13.46	0.11	15.9	-19.37	19.98	0.9	3.9		-0.0820846
		1899-12-31 04:40:26	1.33	-20.95	0.07	3.73	0.07	-0.08	13.44	0.11	16.27	-19	19.61	1	4		-0.0560978
		1899-12-31 04:40:26	1.34	-20.58	0.08	3.72	0.07	-0.07	13.41	0.1	16.64	-18.63	19.24	1.1	4.1		-0.0839902
		1899-12-31 04:40:26	1.34	-20.2	0.09	3.72	0.06	-0.07	13.38	0.09	17.02	-18.25	18.87	1.2	4.2		-0.0815972
		1899-12-31 04:40:27	1.35	-19.83	0.09	3.71	0.06	-0.06	13.36	0.08	17.39	-17.88	18.5	1.3	4.3		-0.0557641
		1899-12-31 04:40:27	1.36	-19.46	0.1	3.7	0.05	-0.04	13.34	0.06	17.76	-17.51	18.13	1.4	4.4		-0.0556807
		1899-12-31 04:40:27	1.37	-19.09	0.1	3.7	0.03	-0.03	13.33	0.05	18.13	-17.14	17.76	1.5	4.5		-0.0278091
		1899-12-31 04:40:27	1.38	-18.72	0.11	3.7	0.02	-0.01	13.32	0.03	18.5	-16.77	17.39	1.6	4.6		-0.0277882
		1899-12-31 04:40:27	1.39	-18.35	0.11	3.7	0.01	0	13.32	0.01	18.87	-16.4	17.02	1.7	4.7		0
		1899-12-31 04:40:27	1.41	-17.98	0.11	3.7	0	0.01	13.32	0.01	19.24	-16.03	16.64	1.8	4.8		0
		1899-12-31 04:40:27	1.42	-17.61	0.11	3.7	-0.02	0.02	13.32	0.03	19.61	-15.66	16.27	1.9	4.9		0
		1899-12-31 04:40:27	1.43	-17.24	0.11	3.7	-0.03	0.03	13.33	0.04	19.98	-15.29	15.9	2	5		0.0277882
		1899-12-31 04:40:27	1.44	-16.87	0.1	3.71	-0.04	0.03	13.35	0.05	20.35	-14.92	15.52	2.1	5.1		0.055639
		1899-12-31 04:40:27	1.45	-16.5	0.1	3.71	-0.05	0.03	13.36	0.06	20.72	-14.55	15.15	2.2	5.2		0.0278508
		1899-12-31 04:40:28	1.46	-16.13	0.09	3.71	-0.06	0.03	13.37	0.07	21.09	-14.18	14.77	2.3	5.3		0.0278716
		1899-12-31 04:40:28	1.47	-15.76	0.09	3.72	-0.07	0.03	13.38	0.08	21.46	-13.81	14.4	2.4	5.4		0.0278925
		1899-12-31 04:40:28	1.47	-15.39	0.08	3.72	-0.08	0.02	13.39	0.09	21.84	-13.43	14.02	2.5	5.5		0.0271788
		1899-12-31 04:40:28	1.48	-15.02	0.07	3.72	-0.09	0.01	13.39	0.09	22.21	-13.06	13.64	2.6	5.6		0
		1899-12-31 04:40:28	1.49	-14.64	0.06	3.72	-0.1	0	13.39	0.1	22.58	-12.69	13.27	2.7	5.7		0
		1899-12-31 04:40:28	1.49	-14.27	0.05	3.72	-0.1	-0.01	13.39	0.11	22.95	-12.32	12.89	2.8	5.8		0
		1899-12-31 04:40:28	1.5	-13.9	0.04	3.72	-0.11	-0.03	13.39	0.11	23.32	-11.95	12.51	2.9	5.9		0		13.39	-11.95	2.9
		1899-12-31 04:40:28	1.5	-13.53	0.03	3.71	-0.11	-0.04	13.37	0.12	23.69	-11.58	12.14	3	6		-0.0558058
		1899-12-31 04:40:28	1.51	-13.16	0.02	3.71	-0.11	-0.06	13.36	0.13	24.07	-11.2	11.76	3.1	6.1		-0.0271382
		1899-12-31 04:40:28	1.51	-12.79	0.01	3.7	-0.11	-0.08	13.33	0.14	24.44	-10.83	11.39	3.2	6.2		-0.0834897
		1899-12-31 04:40:29	1.51	-12.42	0	3.7	-0.11	-0.09	13.3	0.14	24.81	-10.46	11.01	3.3	6.3		-0.0833021
		1899-12-31 04:40:29	1.51	-12.05	-0.01	3.69	-0.1	-0.11	13.27	0.15	25.18	-10.09	10.64	3.4	6.4		-0.0831144
		1899-12-31 04:40:29	1.5	-11.68	-0.02	3.67	-0.09	-0.12	13.23	0.15	25.54	-9.73	10.26	3.5	6.5		-0.113597
		1899-12-31 04:40:29	1.5	-11.31	-0.03	3.66	-0.08	-0.14	13.18	0.16	25.91	-9.36	9.89	3.6	6.6		-0.13769
		1899-12-31 04:40:29	1.5	-10.95	-0.04	3.65	-0.07	-0.15	13.13	0.16	26.28	-8.99	9.51	3.7	6.7		-0.137168
		1899-12-31 04:40:29	1.49	-10.58	-0.05	3.63	-0.06	-0.16	13.08	0.17	26.64	-8.63	9.14	3.8	6.8		-0.140443
		1899-12-31 04:40:29	1.49	-10.22	-0.05	3.62	-0.04	-0.16	13.02	0.17	27	-8.27	8.77	3.9	6.9		-0.167824
		1899-12-31 04:40:29	1.48	-9.86	-0.06	3.6	-0.03	-0.17	12.96	0.17	27.36	-7.91	8.4	4	7		-0.167052
		1899-12-31 04:40:29	1.48	-9.5	-0.06	3.58	-0.01	-0.18	12.9	0.18	27.72	-7.55	8.02	4.1	7.1		-0.166281
		1899-12-31 04:40:29	1.47	-9.14	-0.06	3.56	0	-0.18	12.83	0.18	28.08	-7.19	7.65	4.2	7.2		-0.193019
		1899-12-31 04:40:30	1.46	-8.79	-0.06	3.55	0.02	-0.19	12.77	0.19	28.44	-6.83	7.28	4.3	7.3		-0.164609
		1899-12-31 04:40:30	1.46	-8.43	-0.06	3.53	0.04	-0.19	12.7	0.19	28.79	-6.48	6.91	4.4	7.4		-0.196528
		1899-12-31 04:40:30	1.45	-8.08	-0.05	3.51	0.05	-0.18	12.63	0.19	29.14	-6.13	6.54	4.5	7.5		-0.195448
		1899-12-31 04:40:30	1.45	-7.73	-0.05	3.49	0.07	-0.18	12.57	0.19	29.49	-5.78	6.17	4.6	7.6		-0.166667
		1899-12-31 04:40:30	1.44	-7.38	-0.04	3.47	0.08	-0.17	12.5	0.18	29.84	-5.43	5.8	4.7	7.7		-0.193441
		1899-12-31 04:40:30	1.44	-7.04	-0.03	3.46	0.09	-0.15	12.45	0.18	30.19	-5.08	5.43	4.8	7.8		-0.137511
		1899-12-31 04:40:30	1.44	-6.69	-0.02	3.44	0.1	-0.14	12.39	0.18	30.53	-4.74	5.06	4.9	7.9		-0.169118
		1899-12-31 04:40:30	1.44	-6.35	-0.01	3.43	0.11	-0.13	12.34	0.17	30.87	-4.4	4.7	5	8		-0.140307
		1899-12-31 04:40:30	1.44	-6.01	0	3.42	0.12	-0.11	12.3	0.16	31.22	-4.05	4.33	5.1	8.1		-0.108642
		1899-12-31 04:40:30	1.44	-5.67	0.01	3.41	0.13	-0.1	12.26	0.16	31.56	-3.71	3.97	5.2	8.2		-0.111474
		1899-12-31 04:40:31	1.44	-5.33	0.03	3.4	0.13	-0.08	12.23	0.15	31.9	-3.37	3.6	5.3	8.3		-0.0833674
		1899-12-31 04:40:31	1.44	-4.99	0.04	3.39	0.13	-0.07	12.2	0.15	32.24	-3.03	3.24	5.4	8.4		-0.0831631
		1899-12-31 04:40:31	1.45	-4.65	0.05	3.38	0.13	-0.06	12.18	0.15	32.58	-2.69	2.87	5.5	8.5		-0.0553286
		1899-12-31 04:40:31	1.45	-4.31	0.07	3.38	0.13	-0.05	12.16	0.14	32.91	-2.36	2.51	5.6	8.6		-0.0569117
		1899-12-31 04:40:31	1.46	-3.97	0.08	3.37	0.13	-0.04	12.15	0.14	33.25	-2.02	2.15	5.7	8.7		-0.0275849
		1899-12-31 04:40:31	1.47	-3.63	0.09	3.37	0.13	-0.03	12.13	0.13	33.59	-1.68	1.79	5.8	8.8		-0.0551017
		1899-12-31 04:40:31	1.48	-3.3	0.1	3.37	0.13	-0.03	12.13	0.13	33.93	-1.34	1.43	5.9	8.9		0
		1899-12-31 04:40:31	1.49	-2.96	0.12	3.36	0.13	-0.03	12.12	0.13	34.26	-1.01	1.07	6	9		-0.0283506
		1899-12-31 04:40:31	1.5	-2.63	0.13	3.36	0.13	-0.02	12.11	0.13	34.6	-0.67	0.71	6.1	9.1		-0.0274941
		1899-12-31 04:40:31	1.51	-2.29	0.14	3.36	0.13	-0.02	12.1	0.13	34.93	-0.34	0.36	6.2	9.2		-0.0283039
		1899-12-31 04:40:32	1.53	-1.95	0.16	3.36	0.13	-0.02	12.1	0.13	35.27	0	0	6.3	9.3		0
17	1899-12-31 05:03:25	GlobalTime	X[m]	Y[m]	Vx[m/s]	Vy[m/s]	Ax[m/s2]	Ay[m/s2]	Speed[km/h]	Acceleration[m/s2]	Space[m]				3
		1899-12-31 05:03:22	2.98	-38.77	0.03	3.64	0.03	0.01	13.12	0.03	0	-43.3	43.3	-3.4	-0.4
		1899-12-31 05:03:22	2.98	-38.41	0.03	3.64	0.04	0.01	13.12	0.04	0.36	-42.94	43.1	-3.3	-0.3		0
		1899-12-31 05:03:22	2.99	-38.05	0.03	3.64	0.05	0.01	13.12	0.05	0.73	-42.57	42.9	-3.2	-0.2		0
		1899-12-31 05:03:22	2.99	-37.68	0.04	3.65	0.06	0.01	13.13	0.06	1.09	-42.21	42.7	-3.1	-0.1		0.0281314
		1899-12-31 05:03:22	2.99	-37.32	0.05	3.65	0.07	0.01	13.13	0.07	1.46	-41.84	42.49	-3	1.87157e-11		0					13.13	1.46
		1899-12-31 05:03:22	3	-36.95	0.05	3.65	0.08	0.01	13.14	0.08	1.82	-41.48	42.27	-2.9	0.1		0.0281529
		1899-12-31 05:03:22	3	-36.59	0.06	3.65	0.09	0.01	13.14	0.09	2.19	-41.11	42.05	-2.8	0.2		0
		1899-12-31 05:03:22	3.01	-36.22	0.07	3.65	0.1	0.01	13.15	0.1	2.55	-40.75	41.83	-2.7	0.3		0.0281743
		1899-12-31 05:03:23	3.02	-35.86	0.08	3.65	0.11	0.01	13.15	0.11	2.92	-40.38	41.6	-2.6	0.4		0
		1899-12-31 05:03:23	3.03	-35.49	0.09	3.65	0.12	0	13.15	0.12	3.28	-40.02	41.36	-2.5	0.5		0
		1899-12-31 05:03:23	3.04	-35.13	0.1	3.65	0.13	-0.01	13.15	0.13	3.65	-39.65	41.12	-2.4	0.6		0
		1899-12-31 05:03:23	3.05	-34.76	0.12	3.65	0.14	-0.01	13.15	0.14	4.01	-39.29	40.87	-2.3	0.7		0
		1899-12-31 05:03:23	3.06	-34.4	0.13	3.65	0.14	-0.02	13.15	0.14	4.38	-38.92	40.62	-2.2	0.8		0
		1899-12-31 05:03:23	3.07	-34.03	0.15	3.65	0.14	-0.03	13.14	0.15	4.74	-38.56	40.36	-2.1	0.9		-0.0281743
		1899-12-31 05:03:23	3.09	-33.67	0.16	3.64	0.14	-0.04	13.13	0.15	5.11	-38.19	40.1	-2	1		-0.027392
		1899-12-31 05:03:23	3.11	-33.3	0.17	3.64	0.14	-0.05	13.12	0.15	5.47	-37.83	39.83	-1.9	1.1		-0.0281314
		1899-12-31 05:03:23	3.12	-32.94	0.19	3.63	0.13	-0.06	13.1	0.14	5.84	-37.46	39.56	-1.8	1.2		-0.0546797
		1899-12-31 05:03:23	3.14	-32.58	0.2	3.63	0.12	-0.07	13.08	0.14	6.2	-37.1	39.28	-1.7	1.3		-0.0561128
		1899-12-31 05:03:24	3.16	-32.21	0.21	3.62	0.1	-0.08	13.06	0.13	6.56	-36.74	39	-1.6	1.4		-0.0560271
		1899-12-31 05:03:24	3.19	-31.85	0.22	3.61	0.08	-0.09	13.03	0.12	6.93	-36.37	38.72	-1.5	1.5		-0.0816129
		1899-12-31 05:03:24	3.21	-31.49	0.23	3.6	0.06	-0.09	13	0.11	7.29	-36.01	38.43	-1.4	1.6		-0.083687
		1899-12-31 05:03:24	3.23	-31.13	0.23	3.59	0.04	-0.1	12.97	0.11	7.65	-35.65	38.14	-1.3	1.7		-0.0834941
		1899-12-31 05:03:24	3.25	-30.77	0.24	3.58	0.01	-0.1	12.93	0.1	8.01	-35.29	37.85	-1.2	1.8		-0.111025
		1899-12-31 05:03:24	3.28	-30.41	0.24	3.57	-0.01	-0.11	12.89	0.11	8.37	-34.93	37.55	-1.1	1.9		-0.110682
		1899-12-31 05:03:24	3.3	-30.06	0.24	3.56	-0.04	-0.11	12.85	0.12	8.73	-34.57	37.25	-1	2		-0.11034
		1899-12-31 05:03:24	3.33	-29.7	0.23	3.55	-0.07	-0.11	12.81	0.13	9.08	-34.22	36.95	-0.9	2.1		-0.113139
		1899-12-31 05:03:24	3.35	-29.35	0.22	3.54	-0.09	-0.11	12.77	0.14	9.44	-33.86	36.65	-0.8	2.2		-0.109654
		1899-12-31 05:03:24	3.37	-28.99	0.21	3.53	-0.11	-0.11	12.73	0.16	9.79	-33.51	36.35	-0.7	2.3		-0.112434
		1899-12-31 05:03:25	3.39	-28.64	0.2	3.52	-0.13	-0.11	12.69	0.17	10.14	-33.16	36.05	-0.6	2.4		-0.112081
		1899-12-31 05:03:25	3.41	-28.29	0.19	3.51	-0.15	-0.11	12.65	0.19	10.5	-32.8	35.74	-0.5	2.5		-0.108625
		1899-12-31 05:03:25	3.43	-27.94	0.17	3.5	-0.16	-0.11	12.6	0.2	10.85	-32.45	35.44	-0.4	2.6		-0.139164
		1899-12-31 05:03:25	3.44	-27.59	0.15	3.48	-0.17	-0.12	12.56	0.21	11.2	-32.1	35.14	-0.3	2.7		-0.110935
		1899-12-31 05:03:25	3.46	-27.24	0.14	3.47	-0.18	-0.12	12.51	0.21	11.54	-31.76	34.83	-0.2	2.8		-0.142236
		1899-12-31 05:03:25	3.47	-26.9	0.12	3.46	-0.18	-0.12	12.47	0.22	11.89	-31.41	34.53	-0.1	2.9		-0.110141
		1899-12-31 05:03:25	3.48	-26.55	0.1	3.45	-0.18	-0.12	12.42	0.21	12.24	-31.06	34.23	0	3		-0.13718							12.42	-31.06
		1899-12-31 05:03:25	3.49	-26.21	0.08	3.44	-0.17	-0.12	12.38	0.21	12.58	-30.72	33.93	0.1	3.1		-0.112564
		1899-12-31 05:03:25	3.5	-25.86	0.07	3.43	-0.16	-0.12	12.34	0.2	12.93	-30.37	33.64	0.2	3.2		-0.108995
		1899-12-31 05:03:25	3.51	-25.52	0.05	3.41	-0.15	-0.11	12.29	0.19	13.27	-30.03	33.34	0.3	3.3		-0.13974
		1899-12-31 05:03:26	3.51	-25.18	0.04	3.4	-0.13	-0.1	12.25	0.17	13.61	-29.69	33.05	0.4	3.4		-0.111383
		1899-12-31 05:03:26	3.51	-24.84	0.02	3.39	-0.12	-0.09	12.22	0.15	13.95	-29.35	32.75	0.5	3.5		-0.0832993
		1899-12-31 05:03:26	3.51	-24.5	0.01	3.38	-0.1	-0.08	12.19	0.13	14.29	-29.01	32.46	0.6	3.6		-0.083095
		1899-12-31 05:03:26	3.52	-24.16	0	3.38	-0.09	-0.06	12.16	0.11	14.63	-28.67	32.17	0.7	3.7		-0.0828908
		1899-12-31 05:03:26	3.52	-23.83	-0.01	3.37	-0.08	-0.04	12.14	0.09	14.96	-28.34	31.89	0.8	3.8		-0.0568182
		1899-12-31 05:03:26	3.51	-23.49	-0.01	3.37	-0.06	-0.02	12.13	0.07	15.3	-28	31.6	0.9	3.9		-0.0275395
		1899-12-31 05:03:26	3.51	-23.15	-0.02	3.37	-0.05	0	12.12	0.05	15.64	-27.66	31.31	1	4		-0.0275168
		1899-12-31 05:03:26	3.51	-22.81	-0.02	3.37	-0.04	0.02	12.12	0.04	15.97	-27.33	31.03	1.1	4.1		0
		1899-12-31 05:03:26	3.51	-22.48	-0.03	3.37	-0.03	0.04	12.13	0.05	16.31	-26.99	30.75	1.2	4.2		0.0275168
		1899-12-31 05:03:26	3.5	-22.14	-0.03	3.37	-0.02	0.06	12.15	0.06	16.65	-26.65	30.47	1.3	4.3		0.0551017
		1899-12-31 05:03:27	3.5	-21.8	-0.03	3.38	-0.01	0.08	12.17	0.08	16.99	-26.31	30.19	1.4	4.4		0.0551924
		1899-12-31 05:03:27	3.5	-21.46	-0.03	3.39	-0.01	0.09	12.2	0.09	17.32	-25.98	29.91	1.5	4.5		0.0854728
		1899-12-31 05:03:27	3.5	-21.12	-0.03	3.4	0	0.1	12.24	0.1	17.66	-25.64	29.64	1.6	4.6		0.11093
		1899-12-31 05:03:27	3.49	-20.78	-0.03	3.41	0	0.1	12.27	0.1	18	-25.3	29.36	1.7	4.7		0.0834355
		1899-12-31 05:03:27	3.49	-20.44	-0.03	3.42	0.01	0.1	12.31	0.1	18.34	-24.96	29.08	1.8	4.8		0.111565
		1899-12-31 05:03:27	3.49	-20.1	-0.03	3.43	0.01	0.09	12.34	0.09	18.69	-24.61	28.81	1.9	4.9		0.0815146
		1899-12-31 05:03:27	3.48	-19.76	-0.03	3.44	0.02	0.07	12.37	0.08	19.03	-24.27	28.53	2	5		0.0841163
		1899-12-31 05:03:27	3.48	-19.41	-0.03	3.44	0.02	0.05	12.4	0.06	19.37	-23.93	28.26	2.1	5.1		0.0843205
		1899-12-31 05:03:27	3.48	-19.07	-0.03	3.45	0.02	0.03	12.41	0.04	19.72	-23.58	27.98	2.2	5.2		0.0273479
		1899-12-31 05:03:27	3.47	-18.72	-0.02	3.45	0.02	0	12.42	0.02	20.06	-23.24	27.7	2.3	5.3		0.0281749
		1899-12-31 05:03:28	3.47	-18.38	-0.02	3.45	0.02	-0.03	12.42	0.04	20.41	-22.89	27.42	2.4	5.4		0
		1899-12-31 05:03:28	3.47	-18.03	-0.02	3.45	0.02	-0.07	12.4	0.07	20.75	-22.55	27.13	2.5	5.5		-0.0563272
		1899-12-31 05:03:28	3.47	-17.69	-0.02	3.44	0.02	-0.1	12.37	0.1	21.1	-22.2	26.85	2.6	5.6		-0.0819114
		1899-12-31 05:03:28	3.47	-17.35	-0.01	3.43	0.02	-0.14	12.33	0.14	21.44	-21.86	26.56	2.7	5.7		-0.11211
		1899-12-31 05:03:28	3.47	-17	-0.01	3.41	0.01	-0.17	12.28	0.18	21.78	-21.52	26.27	2.8	5.8		-0.139626
		1899-12-31 05:03:28	3.47	-16.66	-0.01	3.39	0.01	-0.21	12.21	0.21	22.12	-21.18	25.97	2.9	5.9		-0.194524		12.21	-21.18	2.9
		1899-12-31 05:03:28	3.46	-16.33	-0.01	3.37	0	-0.24	12.13	0.24	22.46	-20.84	25.67	3	6		-0.220951
		1899-12-31 05:03:28	3.46	-15.99	-0.01	3.34	0	-0.28	12.04	0.28	22.8	-20.5	25.37	3.1	6.1		-0.246834
		1899-12-31 05:03:28	3.46	-15.66	-0.01	3.32	0	-0.3	11.94	0.3	23.13	-20.17	25.06	3.2	6.2		-0.28035
		1899-12-31 05:03:28	3.46	-15.33	-0.01	3.28	0	-0.33	11.83	0.33	23.46	-19.84	24.75	3.3	6.3		-0.305684
		1899-12-31 05:03:29	3.46	-15	-0.01	3.25	-0.01	-0.35	11.7	0.35	23.79	-19.51	24.43	3.4	6.4		-0.357616
		1899-12-31 05:03:29	3.46	-14.68	-0.01	3.22	0	-0.37	11.57	0.37	24.11	-19.19	24.11	3.5	6.5		-0.364716
		1899-12-31 05:03:29	3.46	-14.36	-0.01	3.18	0	-0.38	11.44	0.38	24.43	-18.87	23.79	3.6	6.6		-0.360641
		1899-12-31 05:03:29	3.46	-14.04	-0.01	3.14	0	-0.39	11.3	0.39	24.75	-18.55	23.46	3.7	6.7		-0.383825
		1899-12-31 05:03:29	3.45	-13.73	-0.01	3.1	0	-0.4	11.16	0.4	25.06	-18.24	23.13	3.8	6.8		-0.391328
		1899-12-31 05:03:29	3.45	-13.42	-0.01	3.06	0	-0.4	11.01	0.4	25.37	-17.93	22.8	3.9	6.9		-0.413866
		1899-12-31 05:03:29	3.45	-13.12	-0.01	3.02	0.01	-0.39	10.87	0.39	25.67	-17.63	22.46	4	7		-0.39393
		1899-12-31 05:03:29	3.45	-12.82	-0.01	2.98	0.01	-0.38	10.73	0.38	25.97	-17.33	22.12	4.1	7.1		-0.388889
		1899-12-31 05:03:29	3.45	-12.52	-0.01	2.94	0.01	-0.36	10.6	0.36	26.27	-17.03	21.78	4.2	7.2		-0.356597
		1899-12-31 05:03:29	3.45	-12.23	-0.01	2.91	0.01	-0.34	10.47	0.34	26.56	-16.74	21.44	4.3	7.3		-0.364397
		1899-12-31 05:03:30	3.45	-11.94	-0.01	2.88	0.01	-0.3	10.36	0.31	26.85	-16.45	21.1	4.4	7.4		-0.304824
		1899-12-31 05:03:30	3.45	-11.65	-0.01	2.85	0.01	-0.27	10.25	0.27	27.13	-16.17	20.75	4.5	7.5		-0.312376
		1899-12-31 05:03:30	3.45	-11.37	-0.01	2.82	0.01	-0.23	10.16	0.23	27.42	-15.88	20.41	4.6	7.6		-0.244373
		1899-12-31 05:03:30	3.44	-11.09	-0.01	2.8	0	-0.19	10.08	0.19	27.7	-15.6	20.06	4.7	7.7		-0.223104
		1899-12-31 05:03:30	3.44	-10.81	-0.01	2.78	0	-0.14	10.02	0.14	27.98	-15.32	19.72	4.8	7.8		-0.166171
		1899-12-31 05:03:30	3.44	-10.53	-0.01	2.77	-0.01	-0.1	9.97	0.1	28.26	-15.04	19.37	4.9	7.9		-0.137718
		1899-12-31 05:03:30	3.44	-10.26	-0.01	2.76	-0.01	-0.06	9.94	0.06	28.53	-14.77	19.03	5	8		-0.0853481
		1899-12-31 05:03:30	3.44	-9.98	-0.01	2.76	-0.01	-0.02	9.93	0.02	28.81	-14.49	18.69	5.1	8.1		-0.0273782
		1899-12-31 05:03:30	3.44	-9.7	-0.01	2.76	-0.02	0.02	9.92	0.02	29.08	-14.22	18.34	5.2	8.2		-0.0283636
		1899-12-31 05:03:30	3.44	-9.43	-0.01	2.76	-0.02	0.05	9.93	0.05	29.36	-13.94	18	5.3	8.3		0.0273506
		1899-12-31 05:03:31	3.44	-9.15	-0.01	2.77	-0.02	0.08	9.96	0.08	29.64	-13.66	17.66	5.4	8.4		0.0822173
		1899-12-31 05:03:31	3.44	-8.88	-0.02	2.77	-0.02	0.1	9.99	0.1	29.91	-13.39	17.32	5.5	8.5		0.0855195
		1899-12-31 05:03:31	3.43	-8.6	-0.02	2.78	-0.02	0.12	10.02	0.12	30.19	-13.11	16.99	5.6	8.6		0.0827133
		1899-12-31 05:03:31	3.43	-8.32	-0.02	2.8	-0.02	0.13	10.07	0.13	30.47	-12.83	16.65	5.7	8.7		0.138407
		1899-12-31 05:03:31	3.43	-8.04	-0.02	2.81	-0.02	0.14	10.12	0.14	30.75	-12.55	16.31	5.8	8.8		0.139096
		1899-12-31 05:03:31	3.43	-7.76	-0.02	2.82	-0.02	0.15	10.17	0.15	31.03	-12.27	15.97	5.9	8.9		0.139785
		1899-12-31 05:03:31	3.43	-7.47	-0.03	2.84	-0.02	0.15	10.22	0.16	31.31	-11.99	15.64	6	9		0.140473
		1899-12-31 05:03:31	3.42	-7.19	-0.03	2.85	-0.02	0.16	10.28	0.16	31.6	-11.7	15.3	6.1	9.1		0.163633
		1899-12-31 05:03:31	3.42	-6.9	-0.03	2.87	-0.02	0.16	10.33	0.16	31.89	-11.41	14.96	6.2	9.2		0.137093
		1899-12-31 05:03:31	3.42	-6.61	-0.03	2.89	-0.02	0.16	10.39	0.16	32.17	-11.13	14.63	6.3	9.3		0.171296
		1899-12-31 05:03:32	3.41	-6.33	-0.03	2.9	-0.03	0.16	10.45	0.16	32.46	-10.84	14.29	6.4	9.4		0.166347
		1899-12-31 05:03:32	3.41	-6.03	-0.04	2.92	-0.03	0.16	10.51	0.16	32.75	-10.55	13.95	6.5	9.5		0.167305
		1899-12-31 05:03:32	3.41	-5.74	-0.04	2.93	-0.03	0.16	10.56	0.16	33.05	-10.25	13.61	6.6	9.6		0.135481
		1899-12-31 05:03:32	3.4	-5.45	-0.04	2.95	-0.04	0.15	10.62	0.16	33.34	-9.96	13.27	6.7	9.7		0.169061
		1899-12-31 05:03:32	3.4	-5.15	-0.05	2.96	-0.04	0.15	10.67	0.15	33.64	-9.66	12.93	6.8	9.8		0.136896
		1899-12-31 05:03:32	3.39	-4.85	-0.05	2.98	-0.04	0.14	10.73	0.15	33.93	-9.37	12.58	6.9	9.9		0.170817
		1899-12-31 05:03:32	3.39	-4.56	-0.05	2.99	-0.04	0.13	10.78	0.14	34.23	-9.07	12.24	7	10		0.13831
		1899-12-31 05:03:32	3.38	-4.26	-0.06	3.01	-0.03	0.12	10.83	0.12	34.53	-8.77	11.89	7.1	10.1		0.138953
		1899-12-31 05:03:32	3.38	-3.95	-0.06	3.02	-0.03	0.1	10.87	0.1	34.83	-8.47	11.54	7.2	10.2		0.111626
		1899-12-31 05:03:32	3.37	-3.65	-0.06	3.03	-0.02	0.07	10.9	0.08	35.14	-8.16	11.2	7.3	10.3		0.0812799
		1899-12-31 05:03:33	3.36	-3.35	-0.07	3.03	-0.02	0.04	10.92	0.04	35.44	-7.86	10.85	7.4	10.4		0.0561214
		1899-12-31 05:03:33	3.36	-3.05	-0.07	3.04	-0.01	0.01	10.93	0.01	35.74	-7.56	10.5	7.5	10.5		0.0280993
		1899-12-31 05:03:33	3.35	-2.74	-0.07	3.03	-0.01	-0.03	10.93	0.03	36.05	-7.25	10.14	7.6	10.6		0
		1899-12-31 05:03:33	3.34	-2.44	-0.07	3.03	0	-0.07	10.91	0.07	36.35	-6.95	9.79	7.7	10.7		-0.0561728
		1899-12-31 05:03:33	3.34	-2.14	-0.07	3.02	0.01	-0.11	10.88	0.11	36.65	-6.65	9.44	7.8	10.8		-0.0840664
		1899-12-31 05:03:33	3.33	-1.83	-0.07	3.01	0.01	-0.15	10.84	0.15	36.95	-6.35	9.08	7.9	10.9		-0.111728
		1899-12-31 05:03:33	3.32	-1.53	-0.07	2.99	0.02	-0.19	10.78	0.19	37.25	-6.05	8.73	8	11		-0.166821
		1899-12-31 05:03:33	3.32	-1.24	-0.06	2.97	0.02	-0.23	10.7	0.23	37.55	-5.75	8.37	8.1	11.1		-0.220988
		1899-12-31 05:03:33	3.31	-0.94	-0.06	2.95	0.02	-0.27	10.61	0.27	37.85	-5.45	8.01	8.2	11.2		-0.246644
		1899-12-31 05:03:33	3.3	-0.65	-0.06	2.92	0.02	-0.3	10.51	0.3	38.14	-5.16	7.65	8.3	11.3		-0.280971
		1899-12-31 05:03:34	3.3	-0.36	-0.06	2.89	0.02	-0.33	10.4	0.33	38.43	-4.87	7.29	8.4	11.4		-0.305995
		1899-12-31 05:03:34	3.29	-0.07	-0.06	2.85	0.02	-0.36	10.28	0.36	38.72	-4.58	6.93	8.5	11.5		-0.33014
		1899-12-31 05:03:34	3.29	0.21	-0.05	2.82	0.02	-0.39	10.14	0.39	39	-4.3	6.56	8.6	11.6		-0.393904
		1899-12-31 05:03:34	3.28	0.49	-0.05	2.78	0.01	-0.41	10	0.41	39.28	-4.02	6.2	8.7	11.7		-0.388503
		1899-12-31 05:03:34	3.28	0.77	-0.05	2.74	0	-0.43	9.85	0.43	39.56	-3.74	5.84	8.8	11.8		-0.41026
		1899-12-31 05:03:34	3.27	1.04	-0.05	2.69	0	-0.45	9.69	0.45	39.83	-3.47	5.47	8.9	11.9		-0.446731
		1899-12-31 05:03:34	3.27	1.31	-0.05	2.65	-0.01	-0.47	9.53	0.47	40.1	-3.2	5.11	9	12		-0.439415
		1899-12-31 05:03:34	3.26	1.57	-0.05	2.6	-0.02	-0.49	9.36	0.49	40.36	-2.94	4.74	9.1	12.1		-0.476511
		1899-12-31 05:03:34	3.25	1.83	-0.06	2.55	-0.03	-0.5	9.18	0.5	40.62	-2.68	4.38	9.2	12.2		-0.495192
		1899-12-31 05:03:34	3.25	2.08	-0.06	2.5	-0.03	-0.51	9	0.52	40.87	-2.43	4.01	9.3	12.3		-0.505
		1899-12-31 05:03:35	3.24	2.33	-0.06	2.45	-0.04	-0.53	8.81	0.53	41.12	-2.18	3.65	9.4	12.4		-0.522207
		1899-12-31 05:03:35	3.24	2.57	-0.07	2.39	-0.04	-0.54	8.62	0.54	41.36	-1.94	3.28	9.5	12.5		-0.532359
		1899-12-31 05:03:35	3.23	2.81	-0.07	2.34	-0.05	-0.54	8.43	0.54	41.6	-1.7	2.92	9.6	12.6		-0.520753
		1899-12-31 05:03:35	3.22	3.04	-0.08	2.29	-0.05	-0.55	8.23	0.55	41.83	-1.47	2.55	9.7	12.7		-0.55891
		1899-12-31 05:03:35	3.21	3.26	-0.08	2.23	-0.06	-0.55	8.04	0.55	42.05	-1.25	2.19	9.8	12.8		-0.542105
		1899-12-31 05:03:35	3.21	3.48	-0.09	2.18	-0.06	-0.55	7.84	0.55	42.27	-1.03	1.82	9.9	12.9		-0.556958
		1899-12-31 05:03:35	3.2	3.7	-0.09	2.12	-0.06	-0.55	7.64	0.55	42.49	-0.81	1.46	10	13		-0.542929
		1899-12-31 05:03:35	3.19	3.91	-0.1	2.07	-0.06	-0.55	7.45	0.55	42.7	-0.6	1.09	10.1	13.1		-0.526731
		1899-12-31 05:03:35	3.18	4.11	-0.1	2.01	-0.06	-0.55	7.25	0.55	42.9	-0.4	0.73	10.2	13.2		-0.56713
		1899-12-31 05:03:35	3.17	4.31	-0.11	1.96	-0.06	-0.55	7.06	0.55	43.1	-0.2	0.36	10.3	13.3		-0.524479
		1899-12-31 05:03:36	3.16	4.5	-0.12	1.9	-0.06	-0.55	6.86	0.55	43.3	0	0	10.4	13.4		-0.537037
18	1899-12-31 05:03:25	GlobalTime	X[m]	Y[m]	Vx[m/s]	Vy[m/s]	Ax[m/s2]	Ay[m/s2]	Speed[km/h]	Acceleration[m/s2]	Space[m]				3
		1899-12-31 05:03:22	2.18	-38.32	-0.03	3.33	0.02	0.02	12	0.03	0	-39.57	39.57	-3.2	-0.2
		1899-12-31 05:03:22	2.18	-37.98	-0.03	3.34	0.02	0.03	12.01	0.04	0.33	-39.24	39.3	-3.1	-0.1		0.0280701
		1899-12-31 05:03:22	2.18	-37.65	-0.02	3.34	0.03	0.04	12.02	0.05	0.67	-38.9	39.03	-3	1.87157e-11		0.0272672					12.02	-38.9
		1899-12-31 05:03:22	2.17	-37.32	-0.02	3.34	0.03	0.05	12.04	0.06	1	-38.57	38.76	-2.9	0.1		0.056257
		1899-12-31 05:03:22	2.17	-36.98	-0.02	3.35	0.04	0.05	12.06	0.07	1.34	-38.23	38.48	-2.8	0.2		0.0546932
		1899-12-31 05:03:23	2.17	-36.65	-0.01	3.35	0.04	0.06	12.08	0.08	1.67	-37.9	38.2	-2.7	0.3		0.0564441
		1899-12-31 05:03:23	2.17	-36.31	-0.01	3.36	0.05	0.07	12.1	0.09	2.01	-37.56	37.91	-2.6	0.4		0.0548747
		1899-12-31 05:03:23	2.17	-35.97	0	3.37	0.05	0.08	12.13	0.09	2.34	-37.23	37.63	-2.5	0.5		0.0849818
		1899-12-31 05:03:23	2.17	-35.64	0	3.38	0.05	0.09	12.16	0.1	2.68	-36.89	37.34	-2.4	0.6		0.0826865
		1899-12-31 05:03:23	2.17	-35.3	0.01	3.39	0.05	0.09	12.19	0.11	3.02	-36.55	37.05	-2.3	0.7		0.0828908
		1899-12-31 05:03:23	2.17	-34.96	0.01	3.4	0.05	0.1	12.22	0.11	3.36	-36.21	36.75	-2.2	0.8		0.083095
		1899-12-31 05:03:23	2.17	-34.62	0.02	3.41	0.05	0.11	12.26	0.12	3.7	-35.87	36.45	-2.1	0.9		0.111111
		1899-12-31 05:03:23	2.17	-34.28	0.02	3.42	0.04	0.11	12.3	0.12	4.04	-35.53	36.14	-2	1		0.111474
		1899-12-31 05:03:23	2.18	-33.94	0.03	3.43	0.04	0.12	12.34	0.12	4.38	-35.19	35.83	-1.9	1.1		0.111837
		1899-12-31 05:03:23	2.18	-33.59	0.03	3.44	0.03	0.12	12.38	0.12	4.72	-34.85	35.51	-1.8	1.2		0.1122
		1899-12-31 05:03:24	2.18	-33.25	0.03	3.45	0.02	0.12	12.43	0.12	5.07	-34.5	35.19	-1.7	1.3		0.136739
		1899-12-31 05:03:24	2.19	-32.9	0.03	3.46	0.02	0.12	12.47	0.12	5.42	-34.15	34.86	-1.6	1.4		0.109788
		1899-12-31 05:03:24	2.19	-32.56	0.04	3.48	0.01	0.12	12.51	0.12	5.76	-33.81	34.52	-1.5	1.5		0.113381
		1899-12-31 05:03:24	2.19	-32.21	0.04	3.49	0.01	0.12	12.55	0.12	6.11	-33.46	34.18	-1.4	1.6		0.110494
		1899-12-31 05:03:24	2.2	-31.86	0.04	3.5	0	0.11	12.6	0.11	6.46	-33.11	33.83	-1.3	1.7		0.138613
		1899-12-31 05:03:24	2.2	-31.51	0.04	3.51	0	0.11	12.64	0.11	6.81	-32.76	33.47	-1.2	1.8		0.111287
		1899-12-31 05:03:24	2.2	-31.16	0.04	3.52	0	0.1	12.67	0.1	7.16	-32.41	33.11	-1.1	1.9		0.0836971
		1899-12-31 05:03:24	2.21	-30.8	0.04	3.53	-0.01	0.09	12.71	0.09	7.51	-32.06	32.74	-1	2		0.111905
		1899-12-31 05:03:24	2.21	-30.45	0.04	3.54	-0.01	0.08	12.74	0.08	7.87	-31.7	32.36	-0.9	2.1		0.0818223
		1899-12-31 05:03:24	2.22	-30.1	0.03	3.55	-0.01	0.07	12.77	0.07	8.22	-31.35	31.98	-0.8	2.2		0.0843585
		1899-12-31 05:03:25	2.22	-29.74	0.03	3.55	-0.01	0.05	12.79	0.06	8.58	-30.99	31.6	-0.7	2.3		0.054784
		1899-12-31 05:03:25	2.22	-29.39	0.03	3.56	-0.01	0.04	12.81	0.04	8.93	-30.64	31.22	-0.6	2.4		0.0564374
		1899-12-31 05:03:25	2.23	-29.03	0.03	3.56	-0.01	0.03	12.82	0.03	9.29	-30.28	30.83	-0.5	2.5		0.027467
		1899-12-31 05:03:25	2.23	-28.67	0.03	3.56	-0.01	0.02	12.83	0.02	9.64	-29.93	30.44	-0.4	2.6		0.0282738
		1899-12-31 05:03:25	2.23	-28.32	0.03	3.57	-0.01	0.01	12.84	0.01	10	-29.57	30.05	-0.3	2.7		0.0275099
		1899-12-31 05:03:25	2.23	-27.96	0.03	3.57	0	0	12.84	0	10.36	-29.21	29.66	-0.2	2.8		0
		1899-12-31 05:03:25	2.24	-27.6	0.03	3.57	0	-0.01	12.84	0.01	10.71	-28.86	29.28	-0.1	2.9		0
		1899-12-31 05:03:25	2.24	-27.25	0.03	3.56	0.01	-0.02	12.83	0.02	11.07	-28.5	28.89	0	3		-0.0275099							12.83	-28.5
		1899-12-31 05:03:25	2.24	-26.89	0.03	3.56	0.02	-0.03	12.83	0.03	11.43	-28.14	28.51	0.1	3.1		0
		1899-12-31 05:03:25	2.25	-26.54	0.03	3.56	0.02	-0.03	12.82	0.04	11.78	-27.79	28.14	0.2	3.2		-0.0282738
		1899-12-31 05:03:26	2.25	-26.18	0.03	3.56	0.03	-0.04	12.8	0.05	12.14	-27.43	27.76	0.3	3.3		-0.0549126
		1899-12-31 05:03:26	2.25	-25.82	0.04	3.55	0.03	-0.05	12.79	0.06	12.49	-27.08	27.39	0.4	3.4		-0.0282077
		1899-12-31 05:03:26	2.26	-25.47	0.04	3.55	0.03	-0.06	12.77	0.07	12.85	-26.72	27.03	0.5	3.5		-0.054784
		1899-12-31 05:03:26	2.26	-25.12	0.04	3.54	0.04	-0.07	12.75	0.08	13.2	-26.37	26.67	0.6	3.6		-0.056261
		1899-12-31 05:03:26	2.27	-24.76	0.05	3.53	0.04	-0.07	12.72	0.08	13.56	-26.01	26.31	0.7	3.7		-0.0818866
		1899-12-31 05:03:26	2.27	-24.41	0.05	3.53	0.04	-0.08	12.69	0.09	13.91	-25.66	25.96	0.8	3.8		-0.0840278
		1899-12-31 05:03:26	2.28	-24.06	0.06	3.52	0.04	-0.09	12.66	0.1	14.26	-25.31	25.62	0.9	3.9		-0.0838294
		1899-12-31 05:03:26	2.28	-23.7	0.06	3.51	0.04	-0.1	12.63	0.11	14.61	-24.96	25.27	1	4		-0.083631
		1899-12-31 05:03:26	2.29	-23.35	0.06	3.5	0.04	-0.11	12.6	0.11	14.96	-24.61	24.94	1.1	4.1		-0.0834325
		1899-12-31 05:03:26	2.29	-23.01	0.07	3.49	0.04	-0.11	12.56	0.12	15.31	-24.26	24.6	1.2	4.2		-0.110935		12.56	-24.26	1.2
		1899-12-31 05:03:27	2.3	-22.66	0.07	3.48	0.03	-0.12	12.52	0.12	15.66	-23.91	24.27	1.3	4.3		-0.110582
		1899-12-31 05:03:27	2.31	-22.31	0.07	3.46	0.02	-0.12	12.47	0.13	16.01	-23.56	23.94	1.4	4.4		-0.137731
		1899-12-31 05:03:27	2.32	-21.96	0.08	3.45	0.01	-0.13	12.43	0.13	16.35	-23.22	23.62	1.5	4.5		-0.113017
		1899-12-31 05:03:27	2.32	-21.62	0.08	3.44	0	-0.13	12.38	0.13	16.7	-22.87	23.29	1.6	4.6		-0.136739
		1899-12-31 05:03:27	2.33	-21.28	0.08	3.42	0	-0.14	12.33	0.14	17.04	-22.53	22.97	1.7	4.7		-0.140194
		1899-12-31 05:03:27	2.34	-20.94	0.08	3.41	-0.01	-0.15	12.28	0.15	17.38	-22.19	22.65	1.8	4.8		-0.139626
		1899-12-31 05:03:27	2.35	-20.59	0.07	3.4	-0.02	-0.15	12.23	0.16	17.72	-21.85	22.33	1.9	4.9		-0.139059
		1899-12-31 05:03:27	2.35	-20.26	0.07	3.38	-0.03	-0.16	12.17	0.16	18.06	-21.51	22	2	5		-0.166122
		1899-12-31 05:03:27	2.36	-19.92	0.07	3.36	-0.03	-0.17	12.11	0.17	18.4	-21.17	21.68	2.1	5.1		-0.165305
		1899-12-31 05:03:27	2.37	-19.58	0.07	3.35	-0.04	-0.17	12.05	0.18	18.74	-20.83	21.36	2.2	5.2		-0.164488
		1899-12-31 05:03:28	2.37	-19.25	0.06	3.33	-0.04	-0.18	11.99	0.18	19.07	-20.5	21.04	2.3	5.3		-0.168631
		1899-12-31 05:03:28	2.38	-18.92	0.06	3.31	-0.04	-0.17	11.92	0.18	19.4	-20.17	20.71	2.4	5.4		-0.195672
		1899-12-31 05:03:28	2.39	-18.59	0.05	3.29	-0.05	-0.17	11.86	0.18	19.73	-19.84	20.39	2.5	5.5		-0.166807
		1899-12-31 05:03:28	2.39	-18.26	0.05	3.28	-0.05	-0.16	11.8	0.17	20.06	-19.51	20.06	2.6	5.6		-0.165965
		1899-12-31 05:03:28	2.4	-17.93	0.04	3.26	-0.05	-0.15	11.74	0.16	20.39	-19.18	19.73	2.7	5.7		-0.165123
		1899-12-31 05:03:28	2.4	-17.61	0.04	3.25	-0.05	-0.13	11.69	0.14	20.71	-18.86	19.4	2.8	5.8		-0.14124
		1899-12-31 05:03:28	2.4	-17.28	0.03	3.23	-0.05	-0.11	11.64	0.12	21.04	-18.53	19.07	2.9	5.9		-0.136375
		1899-12-31 05:03:28	2.41	-16.96	0.03	3.22	-0.06	-0.08	11.61	0.1	21.36	-18.21	18.74	3	6		-0.0840929
		1899-12-31 05:03:28	2.41	-16.64	0.02	3.22	-0.06	-0.05	11.58	0.08	21.68	-17.89	18.4	3.1	6.1		-0.0838759
		1899-12-31 05:03:28	2.41	-16.32	0.02	3.21	-0.06	-0.02	11.57	0.06	22	-17.57	18.06	3.2	6.2		-0.0279104
		1899-12-31 05:03:29	2.41	-15.99	0.01	3.21	-0.06	0.02	11.56	0.06	22.33	-17.24	17.72	3.3	6.3		-0.0270412
		1899-12-31 05:03:29	2.41	-15.67	0.01	3.22	-0.06	0.06	11.58	0.09	22.65	-16.92	17.38	3.4	6.4		0.0557967
		1899-12-31 05:03:29	2.41	-15.35	0	3.22	-0.06	0.11	11.6	0.12	22.97	-16.6	17.04	3.5	6.5		0.0558931
		1899-12-31 05:03:29	2.41	-15.03	-0.01	3.24	-0.07	0.15	11.65	0.16	23.29	-16.28	16.7	3.6	6.6		0.140155
		1899-12-31 05:03:29	2.41	-14.7	-0.01	3.25	-0.07	0.2	11.71	0.21	23.62	-15.95	16.35	3.7	6.7		0.163861
		1899-12-31 05:03:29	2.41	-14.38	-0.02	3.27	-0.07	0.24	11.78	0.25	23.94	-15.63	16.01	3.8	6.8		0.198242
		1899-12-31 05:03:29	2.41	-14.05	-0.03	3.3	-0.08	0.29	11.88	0.3	24.27	-15.3	15.66	3.9	6.9		0.276609
		1899-12-31 05:03:29	2.41	-13.72	-0.04	3.33	-0.08	0.33	11.99	0.34	24.6	-14.97	15.31	4	7		0.30697
		1899-12-31 05:03:29	2.4	-13.38	-0.04	3.36	-0.09	0.37	12.11	0.38	24.94	-14.63	14.96	4.1	7.1		0.328159
		1899-12-31 05:03:29	2.4	-13.05	-0.05	3.4	-0.09	0.4	12.25	0.41	25.27	-14.3	14.61	4.2	7.2		0.398709
		1899-12-31 05:03:30	2.39	-12.7	-0.06	3.44	-0.1	0.43	12.39	0.44	25.62	-13.95	14.26	4.3	7.3		0.380247
		1899-12-31 05:03:30	2.38	-12.36	-0.07	3.49	-0.1	0.45	12.55	0.46	25.96	-13.61	13.91	4.4	7.4		0.452796
		1899-12-31 05:03:30	2.38	-12.01	-0.08	3.53	-0.1	0.46	12.71	0.47	26.31	-13.26	13.56	4.5	7.5		0.445503
		1899-12-31 05:03:30	2.37	-11.65	-0.09	3.58	-0.1	0.46	12.88	0.47	26.67	-12.9	13.2	4.6	7.6		0.46621
		1899-12-31 05:03:30	2.36	-11.29	-0.1	3.62	-0.1	0.45	13.04	0.46	27.03	-12.54	12.85	4.7	7.7		0.444444
		1899-12-31 05:03:30	2.35	-10.93	-0.11	3.67	-0.09	0.44	13.21	0.45	27.39	-12.18	12.49	4.8	7.8		0.478234
		1899-12-31 05:03:30	2.33	-10.56	-0.12	3.71	-0.09	0.42	13.36	0.43	27.76	-11.81	12.14	4.9	7.9		0.415572
		1899-12-31 05:03:30	2.32	-10.18	-0.13	3.75	-0.08	0.38	13.51	0.39	28.14	-11.43	11.78	5	8		0.409204
		1899-12-31 05:03:30	2.31	-9.81	-0.14	3.79	-0.07	0.34	13.64	0.35	28.51	-11.06	11.43	5.1	8.1		0.368024
		1899-12-31 05:03:30	2.29	-9.43	-0.14	3.82	-0.07	0.29	13.76	0.29	28.89	-10.68	11.07	5.2	8.2		0.333821
		1899-12-31 05:03:31	2.28	-9.04	-0.15	3.85	-0.06	0.22	13.86	0.23	29.28	-10.29	10.71	5.3	8.3		0.273227
		1899-12-31 05:03:31	2.26	-8.66	-0.16	3.87	-0.05	0.15	13.93	0.16	29.66	-9.91	10.36	5.4	8.4		0.1975
		1899-12-31 05:03:31	2.25	-8.27	-0.16	3.88	-0.04	0.07	13.98	0.08	30.05	-9.52	10	5.5	8.5		0.138048
		1899-12-31 05:03:31	2.23	-7.88	-0.17	3.88	-0.03	-0.02	13.99	0.04	30.44	-9.13	9.64	5.6	8.6		0.027669
		1899-12-31 05:03:31	2.22	-7.49	-0.17	3.88	-0.02	-0.12	13.97	0.12	30.83	-8.74	9.29	5.7	8.7		-0.0553181
		1899-12-31 05:03:31	2.2	-7.11	-0.17	3.86	-0.01	-0.21	13.92	0.21	31.22	-8.35	8.93	5.8	8.8		-0.137949
		1899-12-31 05:03:31	2.18	-6.72	-0.17	3.84	-0.01	-0.3	13.83	0.3	31.6	-7.97	8.58	5.9	8.9		-0.253564
		1899-12-31 05:03:31	2.16	-6.34	-0.17	3.8	0	-0.39	13.71	0.39	31.98	-7.59	8.22	6	9		-0.335526
		1899-12-31 05:03:31	2.15	-5.96	-0.17	3.76	0.01	-0.47	13.56	0.47	32.36	-7.21	7.87	6.1	9.1		-0.415296
		1899-12-31 05:03:31	2.13	-5.59	-0.17	3.71	0.01	-0.54	13.38	0.54	32.74	-6.83	7.51	6.2	9.2		-0.492325
		1899-12-31 05:03:32	2.11	-5.22	-0.17	3.66	0.01	-0.59	13.18	0.59	33.11	-6.46	7.16	6.3	9.3		-0.553887
		1899-12-31 05:03:32	2.1	-4.86	-0.17	3.6	0.02	-0.63	12.96	0.64	33.47	-6.1	6.81	6.4	9.4		-0.616298
		1899-12-31 05:03:32	2.08	-4.5	-0.17	3.53	0.02	-0.66	12.73	0.66	33.83	-5.74	6.46	6.5	9.5		-0.63322
		1899-12-31 05:03:32	2.06	-4.15	-0.16	3.47	0.02	-0.68	12.49	0.68	34.18	-5.39	6.11	6.6	9.6		-0.667196
		1899-12-31 05:03:32	2.05	-3.81	-0.16	3.4	0.02	-0.68	12.25	0.68	34.52	-5.05	5.76	6.7	9.7		-0.673747
		1899-12-31 05:03:32	2.03	-3.47	-0.16	3.33	0.02	-0.66	12	0.66	34.86	-4.71	5.42	6.8	9.8		-0.68792
		1899-12-31 05:03:32	2.01	-3.14	-0.16	3.26	0.01	-0.64	11.77	0.64	35.19	-4.38	5.07	6.9	9.9		-0.639158
		1899-12-31 05:03:32	2	-2.82	-0.16	3.2	0.01	-0.61	11.54	0.61	35.51	-4.06	4.72	7	10		-0.646376
		1899-12-31 05:03:32	1.98	-2.5	-0.16	3.14	0.01	-0.57	11.33	0.57	35.83	-3.74	4.38	7.1	10.1		-0.579029
		1899-12-31 05:03:32	1.97	-2.19	-0.16	3.09	0	-0.52	11.13	0.52	36.14	-3.43	4.04	7.2	10.2		-0.55904
		1899-12-31 05:03:33	1.95	-1.88	-0.16	3.04	0	-0.48	10.95	0.48	36.45	-3.12	3.7	7.3	10.3		-0.494624
		1899-12-31 05:03:33	1.94	-1.58	-0.16	2.99	0	-0.44	10.78	0.44	36.75	-2.82	3.36	7.4	10.4		-0.475064
		1899-12-31 05:03:33	1.92	-1.28	-0.16	2.95	-0.01	-0.4	10.63	0.4	37.05	-2.52	3.02	7.5	10.5		-0.413002
		1899-12-31 05:03:33	1.9	-0.99	-0.16	2.91	-0.01	-0.36	10.49	0.36	37.34	-2.23	2.68	7.6	10.6		-0.393359
		1899-12-31 05:03:33	1.89	-0.7	-0.16	2.87	-0.02	-0.33	10.36	0.33	37.63	-1.94	2.34	7.7	10.7		-0.360592
		1899-12-31 05:03:33	1.87	-0.42	-0.16	2.84	-0.02	-0.31	10.25	0.31	37.91	-1.66	2.01	7.8	10.8		-0.312376
		1899-12-31 05:03:33	1.86	-0.13	-0.16	2.81	-0.02	-0.29	10.14	0.29	38.2	-1.37	1.67	7.9	10.9		-0.298385
		1899-12-31 05:03:33	1.84	0.15	-0.16	2.78	-0.02	-0.28	10.03	0.28	38.48	-1.09	1.34	8	11		-0.305707
		1899-12-31 05:03:33	1.82	0.42	-0.17	2.75	-0.02	-0.27	9.94	0.27	38.76	-0.81	1	8.1	11.1		-0.247644
		1899-12-31 05:03:33	1.81	0.7	-0.17	2.73	-0.03	-0.27	9.84	0.27	39.03	-0.54	0.67	8.2	11.2		-0.282636
		1899-12-31 05:03:34	1.79	0.97	-0.17	2.7	-0.03	-0.26	9.75	0.27	39.3	-0.27	0.33	8.3	11.3		-0.251929
		1899-12-31 05:03:34	1.77	1.24	-0.17	2.68	-0.03	-0.26	9.65	0.27	39.57	0	0	8.4	11.4		-0.277206
19	1899-12-31 05:22:33	GlobalTime	X[m]	Y[m]	Vx[m/s]	Vy[m/s]	Ax[m/s2]	Ay[m/s2]	Speed[km/h]	Acceleration[m/s2]	Space[m]				3
		1899-12-31 05:22:32	1.48	-38.1	-0.04	6.82	0.04	0.01	24.56	0.04	0	-42.57	42.57	-1.4	1.6
		1899-12-31 05:22:32	1.48	-37.42	-0.04	6.82	0.05	0.01	24.56	0.06	0.68	-41.89	42.36	-1.3	1.7		0
		1899-12-31 05:22:32	1.48	-36.74	-0.03	6.82	0.07	0.02	24.57	0.07	1.36	-41.21	42.14	-1.2	1.8		0.0278742
		1899-12-31 05:22:32	1.47	-36.05	-0.02	6.83	0.08	0.02	24.58	0.08	2.05	-40.52	41.91	-1.1	1.9		0.0274814
		1899-12-31 05:22:32	1.47	-35.37	-0.01	6.83	0.09	0.02	24.58	0.09	2.73	-39.84	41.67	-1	2		0
		1899-12-31 05:22:32	1.47	-34.69	-0.01	6.83	0.1	0.02	24.59	0.11	3.41	-39.16	41.42	-0.9	2.1		0.0278969
		1899-12-31 05:22:32	1.47	-34	0.01	6.83	0.12	0.02	24.6	0.12	4.1	-38.47	41.17	-0.8	2.2		0.0275038
		1899-12-31 05:22:33	1.47	-33.32	0.02	6.84	0.13	0.02	24.61	0.13	4.78	-37.79	40.9	-0.7	2.3		0.0279196
		1899-12-31 05:22:33	1.48	-32.64	0.03	6.84	0.14	0.02	24.62	0.14	5.46	-37.11	40.63	-0.6	2.4		0.027931
		1899-12-31 05:22:33	1.48	-31.95	0.05	6.84	0.15	0.02	24.63	0.15	6.15	-36.42	40.35	-0.5	2.5		0.0275374
		1899-12-31 05:22:33	1.48	-31.27	0.06	6.84	0.16	0.02	24.63	0.16	6.83	-35.74	40.06	-0.4	2.6		0
		1899-12-31 05:22:33	1.49	-30.59	0.08	6.84	0.17	0.01	24.64	0.17	7.52	-35.05	39.77	-0.3	2.7		0.0275485
		1899-12-31 05:22:33	1.5	-29.9	0.09	6.85	0.18	0.01	24.64	0.18	8.2	-34.37	39.47	-0.2	2.8		0
		1899-12-31 05:22:33	1.51	-29.22	0.11	6.85	0.19	0.01	24.65	0.19	8.88	-33.69	39.16	-0.1	2.9		0.027965
		1899-12-31 05:22:33	1.52	-28.53	0.13	6.85	0.19	0	24.65	0.19	9.57	-33	38.84	0	3		0							24.65	-33
		1899-12-31 05:22:33	1.54	-27.85	0.15	6.85	0.2	-0.01	24.65	0.2	10.25	-32.32	38.51	0.1	3.1		0
		1899-12-31 05:22:33	1.55	-27.16	0.17	6.85	0.21	-0.01	24.65	0.21	10.94	-31.63	38.18	0.2	3.2		0
		1899-12-31 05:22:34	1.57	-26.48	0.19	6.84	0.21	-0.02	24.65	0.21	11.62	-30.95	37.83	0.3	3.3		0
		1899-12-31 05:22:34	1.59	-25.79	0.21	6.84	0.21	-0.03	24.64	0.22	12.31	-30.26	37.48	0.4	3.4		-0.0275597
		1899-12-31 05:22:34	1.61	-25.11	0.23	6.84	0.22	-0.04	24.63	0.22	12.99	-29.58	37.12	0.5	3.5		-0.0279537
		1899-12-31 05:22:34	1.64	-24.43	0.26	6.83	0.22	-0.06	24.62	0.22	13.68	-28.89	36.75	0.6	3.6		-0.0275374
		1899-12-31 05:22:34	1.66	-23.74	0.28	6.83	0.22	-0.07	24.6	0.23	14.36	-28.21	36.37	0.7	3.7		-0.0558506
		1899-12-31 05:22:34	1.69	-23.06	0.3	6.82	0.21	-0.09	24.57	0.23	15.04	-27.53	35.98	0.8	3.8		-0.0836908
		1899-12-31 05:22:34	1.72	-22.38	0.32	6.81	0.21	-0.1	24.54	0.23	15.73	-26.84	35.58	0.9	3.9		-0.0823772
		1899-12-31 05:22:34	1.76	-21.7	0.34	6.8	0.21	-0.12	24.51	0.24	16.41	-26.16	35.17	1	4		-0.0834865
		1899-12-31 05:22:34	1.79	-21.02	0.36	6.79	0.2	-0.15	24.46	0.25	17.09	-25.48	34.75	1.1	4.1		-0.138917
		1899-12-31 05:22:34	1.83	-20.34	0.38	6.77	0.2	-0.17	24.41	0.26	17.77	-24.8	34.32	1.2	4.2		-0.138634
		1899-12-31 05:22:35	1.87	-19.67	0.4	6.75	0.19	-0.2	24.35	0.28	18.44	-24.13	33.87	1.3	4.3		-0.168463
		1899-12-31 05:22:35	1.91	-18.99	0.42	6.73	0.18	-0.24	24.28	0.3	19.12	-23.45	33.41	1.4	4.4		-0.193134
		1899-12-31 05:22:35	1.95	-18.32	0.44	6.71	0.17	-0.28	24.19	0.32	19.79	-22.78	32.94	1.5	4.5		-0.251192
		1899-12-31 05:22:35	2	-17.65	0.45	6.68	0.15	-0.32	24.09	0.36	20.46	-22.11	32.45	1.6	4.6		-0.278008
		1899-12-31 05:22:35	2.04	-16.98	0.47	6.64	0.14	-0.37	23.97	0.39	21.13	-21.44	31.95	1.7	4.7		-0.33209
		1899-12-31 05:22:35	2.09	-16.32	0.48	6.6	0.12	-0.42	23.84	0.44	21.79	-20.78	31.44	1.8	4.8		-0.363315
		1899-12-31 05:22:35	2.14	-15.66	0.49	6.56	0.11	-0.48	23.68	0.49	22.45	-20.12	30.92	1.9	4.9		-0.444444
		1899-12-31 05:22:35	2.19	-15.01	0.5	6.51	0.09	-0.54	23.51	0.55	23.11	-19.46	30.38	2	5		-0.468943		23.51	-19.46	0.4
		1899-12-31 05:22:35	2.24	-14.36	0.51	6.45	0.07	-0.6	23.31	0.61	23.76	-18.81	29.83	2.1	5.1		-0.555793
		1899-12-31 05:22:35	2.29	-13.72	0.52	6.39	0.04	-0.67	23.09	0.67	24.4	-18.17	29.27	2.2	5.2		-0.615355
		1899-12-31 05:22:36	2.34	-13.08	0.52	6.32	0.02	-0.73	22.84	0.73	25.04	-17.53	28.69	2.3	5.3		-0.692184
		1899-12-31 05:22:36	2.39	-12.46	0.52	6.25	0	-0.8	22.57	0.8	25.67	-16.9	28.11	2.4	5.4		-0.750827
		1899-12-31 05:22:36	2.45	-11.83	0.52	6.17	-0.03	-0.87	22.27	0.87	26.3	-16.27	27.51	2.5	5.5		-0.82378
		1899-12-31 05:22:36	2.5	-11.22	0.52	6.08	-0.05	-0.94	21.95	0.94	26.91	-15.66	26.91	2.6	5.6		-0.894961
		1899-12-31 05:22:36	2.55	-10.62	0.51	5.98	-0.07	-1	21.61	1	27.51	-15.06	26.3	2.7	5.7		-0.952315
		1899-12-31 05:22:36	2.6	-10.03	0.5	5.88	-0.09	-1.06	21.24	1.07	28.11	-14.46	25.67	2.8	5.8		-1.01945
		1899-12-31 05:22:36	2.65	-9.44	0.49	5.77	-0.12	-1.12	20.85	1.12	28.69	-13.88	25.04	2.9	5.9		-1.09189
		1899-12-31 05:22:36	2.7	-8.87	0.48	5.66	-0.14	-1.17	20.44	1.17	29.27	-13.3	24.4	3	6		-1.12607
		1899-12-31 05:22:36	2.75	-8.31	0.47	5.54	-0.16	-1.21	20.01	1.22	29.83	-12.74	23.76	3.1	6.1		-1.1983
		1899-12-31 05:22:36	2.79	-7.77	0.45	5.42	-0.17	-1.24	19.56	1.25	30.38	-12.19	23.11	3.2	6.2		-1.24905
		1899-12-31 05:22:37	2.84	-7.23	0.43	5.29	-0.19	-1.27	19.11	1.28	30.92	-11.65	22.45	3.3	6.3		-1.24325
		1899-12-31 05:22:37	2.88	-6.71	0.41	5.16	-0.21	-1.29	18.65	1.3	31.44	-11.13	21.79	3.4	6.4		-1.2887
		1899-12-31 05:22:37	2.92	-6.2	0.39	5.03	-0.22	-1.29	18.18	1.31	31.95	-10.62	21.13	3.5	6.5		-1.30947
		1899-12-31 05:22:37	2.96	-5.7	0.37	4.91	-0.23	-1.29	17.71	1.31	32.45	-10.12	20.46	3.6	6.6		-1.30157
		1899-12-31 05:22:37	2.99	-5.22	0.35	4.78	-0.24	-1.28	17.24	1.31	32.94	-9.63	19.79	3.7	6.7		-1.29334
		1899-12-31 05:22:37	3.03	-4.75	0.32	4.65	-0.24	-1.27	16.77	1.29	33.41	-9.16	19.12	3.8	6.8		-1.31211
		1899-12-31 05:22:37	3.06	-4.29	0.3	4.52	-0.25	-1.24	16.32	1.26	33.87	-8.7	18.44	3.9	6.9		-1.24887
		1899-12-31 05:22:37	3.09	-3.84	0.27	4.4	-0.25	-1.21	15.87	1.23	34.32	-8.25	17.77	4	7		-1.2419
		1899-12-31 05:22:37	3.11	-3.41	0.25	4.28	-0.25	-1.17	15.43	1.2	34.75	-7.82	17.09	4.1	7.1		-1.23564
		1899-12-31 05:22:37	3.14	-2.98	0.22	4.16	-0.25	-1.13	15.01	1.16	35.17	-7.4	16.41	4.2	7.2		-1.17438
		1899-12-31 05:22:38	3.16	-2.57	0.2	4.05	-0.24	-1.09	14.6	1.11	35.58	-6.99	15.73	4.3	7.3		-1.14236
		1899-12-31 05:22:38	3.18	-2.17	0.18	3.94	-0.24	-1.04	14.21	1.07	35.98	-6.59	15.04	4.4	7.4		-1.08371
		1899-12-31 05:22:38	3.19	-1.78	0.15	3.84	-0.23	-1	13.84	1.03	36.37	-6.2	14.36	4.5	7.5		-1.02668
		1899-12-31 05:22:38	3.21	-1.41	0.13	3.74	-0.22	-0.96	13.48	0.99	36.75	-5.82	13.68	4.6	7.6		-0.998538
		1899-12-31 05:22:38	3.22	-1.04	0.11	3.65	-0.22	-0.92	13.14	0.95	37.12	-5.45	12.99	4.7	7.7		-0.943735
		1899-12-31 05:22:38	3.23	-0.68	0.09	3.56	-0.21	-0.89	12.81	0.91	37.48	-5.09	12.31	4.8	7.8		-0.917728
		1899-12-31 05:22:38	3.24	-0.32	0.06	3.47	-0.2	-0.85	12.49	0.88	37.83	-4.74	11.62	4.9	7.9		-0.892416
		1899-12-31 05:22:38	3.24	0.02	0.04	3.39	-0.19	-0.83	12.19	0.85	38.18	-4.39	10.94	5	8		-0.816138
		1899-12-31 05:22:38	3.24	0.35	0.03	3.3	-0.18	-0.81	11.89	0.83	38.51	-4.06	10.25	5.1	8.1		-0.844557
		1899-12-31 05:22:38	3.25	0.68	0.01	3.22	-0.18	-0.79	11.6	0.81	38.84	-3.73	9.57	5.2	8.2		-0.796402
		1899-12-31 05:22:39	3.25	1	-0.01	3.14	-0.17	-0.78	11.32	0.8	39.16	-3.41	8.88	5.3	8.3		-0.773727
		1899-12-31 05:22:39	3.24	1.31	-0.03	3.07	-0.16	-0.78	11.04	0.8	39.47	-3.1	8.2	5.4	8.4		-0.779172
		1899-12-31 05:22:39	3.24	1.61	-0.04	2.99	-0.16	-0.78	10.76	0.8	39.77	-2.8	7.52	5.5	8.5		-0.784979
		1899-12-31 05:22:39	3.24	1.91	-0.06	2.91	-0.15	-0.79	10.48	0.8	40.06	-2.51	6.83	5.6	8.6		-0.791188
		1899-12-31 05:22:39	3.23	2.19	-0.07	2.83	-0.15	-0.79	10.19	0.81	40.35	-2.22	6.15	5.7	8.7		-0.797454
		1899-12-31 05:22:39	3.22	2.47	-0.09	2.75	-0.15	-0.8	9.91	0.82	40.63	-1.94	5.46	5.8	8.8		-0.775463
		1899-12-31 05:22:39	3.21	2.74	-0.1	2.67	-0.15	-0.81	9.62	0.83	40.9	-1.67	4.78	5.9	8.9		-0.809285
		1899-12-31 05:22:39	3.2	3.01	-0.12	2.59	-0.14	-0.82	9.33	0.83	41.17	-1.4	4.1	6	9		-0.785251
		1899-12-31 05:22:39	3.19	3.26	-0.13	2.51	-0.14	-0.83	9.04	0.84	41.42	-1.15	3.41	6.1	9.1		-0.822114
		1899-12-31 05:22:39	3.17	3.51	-0.15	2.42	-0.14	-0.83	8.74	0.85	41.67	-0.9	2.73	6.2	9.2		-0.823148
		1899-12-31 05:22:40	3.16	3.74	-0.16	2.34	-0.14	-0.84	8.44	0.85	41.91	-0.66	2.05	6.3	9.3		-0.828511
		1899-12-31 05:22:40	3.14	3.97	-0.17	2.26	-0.14	-0.84	8.15	0.85	42.14	-0.43	1.36	6.4	9.4		-0.807015
		1899-12-31 05:22:40	3.12	4.2	-0.19	2.17	-0.14	-0.84	7.85	0.85	42.36	-0.21	0.68	6.5	9.5		-0.841751
		1899-12-31 05:22:40	3.1	4.41	-0.2	2.09	-0.14	-0.84	7.55	0.85	42.57	0	0	6.6	9.6		-0.848765
20	1899-12-31 00:11:36	GlobalTime	X[m]	Y[m]	Vx[m/s]	Vy[m/s]	Ax[m/s2]	Ay[m/s2]	Speed[km/h]	Acceleration[m/s2]	Space[m]				3		加速度
		1899-12-31 00:11:35	-2.38	-67.13	-0.12	5.64	0.04	0.05	20.3	0.06	0	65.8	65.8	-0.9	2.1
		1899-12-31 00:11:35	-2.39	-66.57	-0.11	5.64	0.05	0.07	20.32	0.08	0.56	65.24	65.76	-0.8	2.2		0.0559689
		1899-12-31 00:11:35	-2.41	-66	-0.11	5.65	0.06	0.08	20.35	0.1	1.13	64.67	65.7	-0.7	2.3		0.082582
		1899-12-31 00:11:35	-2.42	-65.44	-0.1	5.66	0.07	0.1	20.38	0.12	1.7	64.1	65.62	-0.6	2.4		0.0827039
		1899-12-31 00:11:35	-2.43	-64.87	-0.09	5.67	0.08	0.11	20.41	0.14	2.26	63.54	65.53	-0.5	2.5		0.0843047
		1899-12-31 00:11:36	-2.43	-64.3	-0.08	5.68	0.09	0.12	20.45	0.15	2.83	62.97	65.41	-0.4	2.6		0.110624
		1899-12-31 00:11:36	-2.44	-63.73	-0.07	5.69	0.1	0.13	20.5	0.16	3.4	62.4	65.27	-0.3	2.7		0.138584
		1899-12-31 00:11:36	-2.45	-63.16	-0.06	5.71	0.11	0.13	20.54	0.17	3.97	61.83	65.12	-0.2	2.8		0.111111
		1899-12-31 00:11:36	-2.45	-62.59	-0.05	5.72	0.13	0.13	20.59	0.18	4.54	61.26	64.94	-0.1	2.9		0.139193
		1899-12-31 00:11:36	-2.46	-62.02	-0.04	5.73	0.14	0.14	20.64	0.19	5.12	60.68	64.75	0	3		0.137126							20.64	60.68
		1899-12-31 00:11:36	-2.46	-61.44	-0.02	5.75	0.15	0.14	20.69	0.2	5.69	60.11	64.53	0.1	3.1		0.13987
		1899-12-31 00:11:36	-2.46	-60.87	-0.01	5.76	0.16	0.14	20.74	0.21	6.27	59.53	64.29	0.2	3.2		0.137791
		1899-12-31 00:11:36	-2.46	-60.29	0.01	5.77	0.17	0.14	20.79	0.22	6.84	58.96	64.04	0.3	3.3		0.140547
		1899-12-31 00:11:36	-2.46	-59.71	0.02	5.79	0.18	0.14	20.84	0.23	7.42	58.38	63.77	0.4	3.4		0.138457
		1899-12-31 00:11:36	-2.46	-59.13	0.04	5.8	0.19	0.14	20.89	0.23	8	57.8	63.47	0.5	3.5		0.138789
		1899-12-31 00:11:37	-2.45	-58.55	0.06	5.82	0.2	0.13	20.94	0.24	8.58	57.22	63.16	0.6	3.6		0.139122
		1899-12-31 00:11:37	-2.45	-57.97	0.08	5.83	0.21	0.13	20.98	0.24	9.17	56.63	62.83	0.7	3.7		0.109646
		1899-12-31 00:11:37	-2.44	-57.38	0.1	5.84	0.21	0.13	21.03	0.25	9.75	56.05	62.48	0.8	3.8		0.13972
		1899-12-31 00:11:37	-2.43	-56.8	0.12	5.85	0.21	0.12	21.08	0.25	10.34	55.46	62.12	0.9	3.9		0.137679
		1899-12-31 00:11:37	-2.41	-56.21	0.15	5.87	0.21	0.12	21.12	0.24	10.92	54.88	61.73	1	4		0.112282
		1899-12-31 00:11:37	-2.4	-55.62	0.17	5.88	0.21	0.11	21.17	0.24	11.51	54.29	61.34	1.1	4.1		0.138268
		1899-12-31 00:11:37	-2.38	-55.03	0.19	5.89	0.21	0.11	21.21	0.23	12.1	53.7	60.92	1.2	4.2		0.11085
		1899-12-31 00:11:37	-2.36	-54.45	0.21	5.9	0.2	0.1	21.25	0.23	12.69	53.11	60.49	1.3	4.3		0.111059
		1899-12-31 00:11:37	-2.34	-53.85	0.23	5.91	0.19	0.1	21.29	0.21	13.28	52.52	60.05	1.4	4.4		0.111268
		1899-12-31 00:11:37	-2.31	-53.26	0.25	5.92	0.17	0.1	21.33	0.2	13.87	51.93	59.6	1.5	4.5		0.111477
		1899-12-31 00:11:38	-2.29	-52.67	0.26	5.93	0.16	0.09	21.36	0.18	14.47	51.33	59.13	1.6	4.6		0.0823495
		1899-12-31 00:11:38	-2.26	-52.08	0.28	5.94	0.13	0.09	21.4	0.16	15.06	50.74	58.65	1.7	4.7		0.111843
		1899-12-31 00:11:38	-2.23	-51.48	0.29	5.95	0.11	0.08	21.43	0.14	15.66	50.14	58.16	1.8	4.8		0.0826196
		1899-12-31 00:11:38	-2.2	-50.88	0.3	5.95	0.08	0.08	21.46	0.11	16.25	49.55	57.66	1.9	4.9		0.0841376
		1899-12-31 00:11:38	-2.17	-50.29	0.31	5.96	0.05	0.08	21.49	0.09	16.85	48.95	57.14	2	5		0.0828511
		1899-12-31 00:11:38	-2.14	-49.69	0.31	5.97	0.02	0.08	21.52	0.08	17.45	48.35	56.62	2.1	5.1		0.0829668
		1899-12-31 00:11:38	-2.11	-49.09	0.31	5.98	-0.01	0.08	21.55	0.08	18.05	47.75	56.09	2.2	5.2		0.0830826
		1899-12-31 00:11:38	-2.08	-48.49	0.31	5.99	-0.04	0.09	21.58	0.09	18.65	47.15	55.55	2.3	5.3		0.0831983
		1899-12-31 00:11:38	-2.05	-47.9	0.31	5.99	-0.07	0.09	21.61	0.11	19.25	46.55	55.01	2.4	5.4		0.083314
		1899-12-31 00:11:38	-2.02	-47.29	0.3	6	-0.09	0.1	21.64	0.14	19.85	45.95	54.45	2.5	5.5		0.0834298
		1899-12-31 00:11:39	-1.99	-46.69	0.29	6.01	-0.12	0.11	21.68	0.16	20.45	45.35	53.89	2.6	5.6		0.11142
		1899-12-31 00:11:39	-1.96	-46.09	0.28	6.03	-0.15	0.12	21.71	0.19	21.05	44.75	53.32	2.7	5.7		0.0836998
		1899-12-31 00:11:39	-1.93	-45.49	0.26	6.04	-0.17	0.12	21.75	0.21	21.66	44.14	52.75	2.8	5.8		0.109947
		1899-12-31 00:11:39	-1.9	-44.88	0.24	6.05	-0.19	0.13	21.8	0.23	22.26	43.54	52.17	2.9	5.9		0.140014
		1899-12-31 00:11:39	-1.88	-44.28	0.22	6.06	-0.22	0.14	21.84	0.26	22.87	42.93	51.59	3	6		0.110403
		1899-12-31 00:11:39	-1.86	-43.67	0.2	6.08	-0.24	0.14	21.89	0.28	23.48	42.32	51	3.1	6.1		0.138288
		1899-12-31 00:11:39	-1.84	-43.06	0.18	6.09	-0.26	0.14	21.94	0.29	24.09	41.71	50.41	3.2	6.2		0.138604
		1899-12-31 00:11:39	-1.82	-42.45	0.15	6.1	-0.28	0.14	21.98	0.31	24.7	41.1	49.81	3.3	6.3		0.111111
		1899-12-31 00:11:39	-1.81	-41.84	0.12	6.12	-0.3	0.13	22.03	0.32	25.31	40.49	49.21	3.4	6.4		0.139173
		1899-12-31 00:11:39	-1.8	-41.22	0.09	6.13	-0.31	0.12	22.07	0.33	25.92	39.88	48.61	3.5	6.5		0.111566
		1899-12-31 00:11:40	-1.79	-40.61	0.06	6.14	-0.32	0.1	22.11	0.34	26.54	39.26	48.01	3.6	6.6		0.109966
		1899-12-31 00:11:40	-1.79	-39.99	0.03	6.15	-0.33	0.09	22.15	0.34	27.15	38.65	47.4	3.7	6.7		0.111971
		1899-12-31 00:11:40	-1.79	-39.38	-0.01	6.16	-0.33	0.06	22.17	0.34	27.77	38.03	46.79	3.8	6.8		0.0551573
		1899-12-31 00:11:40	-1.79	-38.76	-0.04	6.17	-0.33	0.04	22.19	0.34	28.39	37.41	46.18	3.9	6.9		0.0552071
		1899-12-31 00:11:40	-1.8	-38.14	-0.07	6.17	-0.33	0.02	22.21	0.33	29	36.8	45.57	4	7		0.0561627
		1899-12-31 00:11:40	-1.8	-37.53	-0.11	6.17	-0.32	0	22.21	0.32	29.62	36.18	44.96	4.1	7.1		0
		1899-12-31 00:11:40	-1.82	-36.91	-0.14	6.17	-0.31	-0.02	22.21	0.31	30.24	35.56	44.35	4.2	7.2		0
		1899-12-31 00:11:40	-1.83	-36.29	-0.17	6.17	-0.29	-0.04	22.21	0.29	30.86	34.94	43.74	4.3	7.3		0
		1899-12-31 00:11:40	-1.85	-35.67	-0.2	6.16	-0.27	-0.05	22.19	0.28	31.47	34.33	43.13	4.4	7.4		-0.0561627
		1899-12-31 00:11:40	-1.87	-35.06	-0.22	6.16	-0.24	-0.06	22.18	0.25	32.09	33.71	42.51	4.5	7.5		-0.0276098
		1899-12-31 00:11:41	-1.89	-34.44	-0.25	6.15	-0.21	-0.07	22.16	0.22	32.71	33.09	41.9	4.6	7.6		-0.0551822
		1899-12-31 00:11:41	-1.92	-33.83	-0.27	6.14	-0.18	-0.07	22.14	0.19	33.32	32.48	41.29	4.71	7.71		-0.0560362
		1899-12-31 00:11:41	-1.95	-33.21	-0.28	6.14	-0.14	-0.07	22.11	0.16	33.94	31.86	40.68	4.81	7.81		-0.0826053
		1899-12-31 00:11:41	-1.98	-32.6	-0.3	6.13	-0.1	-0.06	22.09	0.12	34.55	31.25	40.07	4.91	7.91		-0.0559097
		1899-12-31 00:11:41	-2.01	-31.99	-0.3	6.12	-0.06	-0.06	22.07	0.08	35.17	30.63	39.45	5.01	8.01		-0.0549582
		1899-12-31 00:11:41	-2.04	-31.37	-0.31	6.12	-0.02	-0.05	22.05	0.05	35.78	30.02	38.84	5.11	8.11		-0.0558085
		1899-12-31 00:11:41	-2.07	-30.76	-0.31	6.11	0.02	-0.04	22.04	0.04	36.39	29.41	38.23	5.21	8.21		-0.0278853
		1899-12-31 00:11:41	-2.1	-30.15	-0.31	6.11	0.05	-0.03	22.03	0.06	37.01	28.79	37.62	5.31	8.31		-0.0274231
		1899-12-31 00:11:41	-2.13	-29.54	-0.3	6.11	0.09	-0.02	22.02	0.09	37.62	28.18	37.01	5.41	8.41		-0.02786
		1899-12-31 00:11:42	-2.16	-28.93	-0.29	6.11	0.12	-0.01	22.01	0.12	38.23	27.57	36.39	5.51	8.51		-0.0278473
		1899-12-31 00:11:42	-2.19	-28.31	-0.28	6.11	0.15	0	22.01	0.15	38.84	26.96	35.78	5.61	8.61		0
		1899-12-31 00:11:42	-2.21	-27.7	-0.26	6.11	0.17	0.01	22.01	0.17	39.45	26.35	35.17	5.71	8.71		0
		1899-12-31 00:11:42	-2.24	-27.09	-0.24	6.11	0.2	0.02	22.01	0.2	40.07	25.73	34.55	5.81	8.81		0
		1899-12-31 00:11:42	-2.26	-26.48	-0.22	6.11	0.21	0.02	22.01	0.22	40.68	25.12	33.94	5.91	8.91		0
		1899-12-31 00:11:42	-2.29	-25.87	-0.2	6.11	0.23	0.02	22.02	0.23	41.29	24.51	33.32	6.01	9.01		0.0278473
		1899-12-31 00:11:42	-2.3	-25.26	-0.18	6.11	0.24	0.01	22.02	0.24	41.9	23.9	32.71	6.11	9.11		0
		1899-12-31 00:11:42	-2.32	-24.64	-0.16	6.11	0.24	0.01	22.02	0.24	42.51	23.29	32.09	6.21	9.21		0
		1899-12-31 00:11:42	-2.34	-24.03	-0.13	6.12	0.23	0	22.02	0.23	43.13	22.67	31.47	6.31	9.31		0
		1899-12-31 00:11:42	-2.35	-23.42	-0.11	6.11	0.23	-0.02	22.02	0.23	43.74	22.06	30.86	6.41	9.41		0
		1899-12-31 00:11:43	-2.36	-22.81	-0.09	6.11	0.21	-0.03	22.01	0.21	44.35	21.45	30.24	6.51	9.51		-0.0278473
		1899-12-31 00:11:43	-2.36	-22.2	-0.07	6.11	0.19	-0.05	21.99	0.2	44.96	20.84	29.62	6.61	9.61		-0.0556567
		1899-12-31 00:11:43	-2.37	-21.59	-0.05	6.1	0.17	-0.08	21.97	0.19	45.57	20.23	29	6.71	9.71		-0.0556062
		1899-12-31 00:11:43	-2.37	-20.97	-0.03	6.09	0.15	-0.11	21.94	0.18	46.18	19.62	28.39	6.81	9.81		-0.0833144
		1899-12-31 00:11:43	-2.38	-20.37	-0.02	6.08	0.12	-0.14	21.9	0.18	46.79	19.01	27.77	6.91	9.91		-0.110909
		1899-12-31 00:11:43	-2.38	-19.76	-0.01	6.07	0.09	-0.17	21.84	0.2	47.4	18.4	27.15	7.01	10.01		-0.165984
		1899-12-31 00:11:43	-2.38	-19.15	0	6.05	0.06	-0.21	21.77	0.22	48.01	17.79	26.54	7.11	10.11		-0.193072
		1899-12-31 00:11:43	-2.38	-18.55	0.01	6.03	0.03	-0.25	21.69	0.25	48.61	17.19	25.92	7.21	10.21		-0.22356
		1899-12-31 00:11:43	-2.38	-17.94	0.01	6	0	-0.29	21.6	0.29	49.21	16.59	25.31	7.31	10.31		-0.250521
		1899-12-31 00:11:43	-2.38	-17.35	0.01	5.97	-0.03	-0.33	21.49	0.33	49.81	15.99	24.7	7.41	10.41		-0.304778
		1899-12-31 00:11:44	-2.38	-16.75	0	5.93	-0.06	-0.37	21.36	0.38	50.41	15.39	24.09	7.51	10.51		-0.358185
		1899-12-31 00:11:44	-2.38	-16.16	0	5.9	-0.09	-0.42	21.22	0.43	51	14.8	23.48	7.61	10.61		-0.389804
		1899-12-31 00:11:44	-2.38	-15.57	-0.01	5.85	-0.11	-0.46	21.07	0.47	51.59	14.21	22.87	7.71	10.71		-0.414803
		1899-12-31 00:11:44	-2.38	-14.99	-0.02	5.8	-0.13	-0.51	20.9	0.52	52.17	13.63	22.26	7.81	10.81		-0.474597		20.9	13.63	7.81
		1899-12-31 00:11:44	-2.38	-14.41	-0.04	5.75	-0.15	-0.55	20.71	0.57	52.75	13.05	21.66	7.91	10.91		-0.525882
		1899-12-31 00:11:44	-2.39	-13.83	-0.05	5.7	-0.16	-0.6	20.51	0.62	53.32	12.48	21.05	8.01	11.01		-0.557992
		1899-12-31 00:11:44	-2.39	-13.27	-0.07	5.63	-0.17	-0.65	20.28	0.67	53.89	11.91	20.45	8.11	11.11		-0.634997
		1899-12-31 00:11:44	-2.4	-12.71	-0.09	5.57	-0.17	-0.7	20.05	0.72	54.45	11.35	19.85	8.21	11.21		-0.639047
		1899-12-31 00:11:44	-2.41	-12.15	-0.1	5.5	-0.17	-0.75	19.79	0.77	55.01	10.79	19.25	8.31	11.31		-0.713624
		1899-12-31 00:11:44	-2.42	-11.61	-0.12	5.42	-0.17	-0.8	19.52	0.81	55.55	10.25	18.65	8.41	11.41		-0.758295
		1899-12-31 00:11:45	-2.43	-11.07	-0.14	5.34	-0.16	-0.85	19.22	0.86	56.09	9.71	18.05	8.51	11.51		-0.830333
		1899-12-31 00:11:45	-2.45	-10.54	-0.15	5.25	-0.15	-0.9	18.91	0.91	56.62	9.18	17.45	8.61	11.61		-0.860434
		1899-12-31 00:11:45	-2.46	-10.02	-0.17	5.16	-0.13	-0.96	18.59	0.97	57.14	8.66	16.85	8.71	11.71		-0.890313
		1899-12-31 00:11:45	-2.48	-9.51	-0.18	5.06	-0.11	-1.01	18.24	1.02	57.66	8.14	16.25	8.81	11.81		-0.956382
		1899-12-31 00:11:45	-2.5	-9	-0.19	4.96	-0.09	-1.07	17.86	1.08	58.16	7.64	15.66	8.91	11.91		-1.05849
		1899-12-31 00:11:45	-2.52	-8.51	-0.2	4.85	-0.07	-1.14	17.47	1.14	58.65	7.15	15.06	9.01	12.01		-1.08487
		1899-12-31 00:11:45	-2.54	-8.03	-0.21	4.73	-0.04	-1.2	17.06	1.2	59.13	6.67	14.47	9.11	12.11		-1.1379
		1899-12-31 00:11:45	-2.56	-7.57	-0.21	4.61	-0.01	-1.27	16.61	1.27	59.6	6.2	13.87	9.21	12.21		-1.24372
		1899-12-31 00:11:45	-2.58	-7.11	-0.21	4.48	0.01	-1.34	16.15	1.34	60.05	5.75	13.28	9.31	12.31		-1.29198
		1899-12-31 00:11:45	-2.6	-6.67	-0.21	4.34	0.04	-1.41	15.66	1.41	60.49	5.31	12.69	9.41	12.41		-1.3667
		1899-12-31 00:11:46	-2.62	-6.24	-0.2	4.2	0.06	-1.48	15.14	1.48	60.92	4.88	12.1	9.51	12.51		-1.43698
		1899-12-31 00:11:46	-2.64	-5.83	-0.2	4.05	0.08	-1.55	14.6	1.55	61.34	4.46	11.51	9.61	12.61		-1.4752
		1899-12-31 00:11:46	-2.66	-5.43	-0.19	3.89	0.1	-1.61	14.03	1.62	61.73	4.07	10.92	9.71	12.71		-1.61435
		1899-12-31 00:11:46	-2.68	-5.05	-0.18	3.73	0.12	-1.67	13.44	1.68	62.12	3.68	10.34	9.81	12.81		-1.60329
		1899-12-31 00:11:46	-2.7	-4.68	-0.16	3.56	0.14	-1.73	12.83	1.73	62.48	3.32	9.75	9.91	12.91		-1.71732
		1899-12-31 00:11:46	-2.71	-4.34	-0.15	3.39	0.16	-1.78	12.2	1.79	62.83	2.97	9.17	10.01	13.01		-1.73819
		1899-12-31 00:11:46	-2.73	-4.01	-0.13	3.21	0.17	-1.82	11.55	1.83	63.16	2.64	8.58	10.11	13.11		-1.8048
		1899-12-31 00:11:46	-2.74	-3.69	-0.12	3.02	0.18	-1.86	10.89	1.87	63.47	2.33	8	10.21	13.21		-1.84319
		1899-12-31 00:11:46	-2.75	-3.4	-0.1	2.83	0.19	-1.9	10.21	1.91	63.77	2.03	7.42	10.31	13.31		-1.84516
		1899-12-31 00:11:46	-2.76	-3.13	-0.08	2.64	0.2	-1.93	9.52	1.94	64.04	1.76	6.84	10.41	13.41		-1.94526
		1899-12-31 00:11:47	-2.77	-2.87	-0.06	2.45	0.21	-1.95	8.82	1.96	64.29	1.51	6.27	10.51	13.51		-1.98117
		1899-12-31 00:11:47	-2.77	-2.64	-0.04	2.25	0.22	-1.97	8.12	1.98	64.53	1.27	5.69	10.61	13.61		-1.90619
		1899-12-31 00:11:47	-2.77	-2.42	-0.01	2.06	0.22	-1.98	7.4	1.99	64.75	1.05	5.12	10.71	13.71		-1.9596
		1899-12-31 00:11:47	-2.77	-2.23	0.01	1.86	0.22	-1.99	6.69	2.01	64.94	0.86	4.54	10.81	13.81		-2.03133
		1899-12-31 00:11:47	-2.77	-2.05	0.03	1.66	0.23	-2	5.97	2.01	65.12	0.68	3.97	10.91	13.91		-1.9537
		1899-12-31 00:11:47	-2.77	-1.89	0.05	1.46	0.23	-2.01	5.25	2.02	65.27	0.53	3.4	11.01	14.01		-2.07778
		1899-12-31 00:11:47	-2.76	-1.76	0.08	1.26	0.23	-2.01	4.53	2.02	65.41	0.39	2.83	11.11	14.11		-1.94048
		1899-12-31 00:11:47	-2.75	-1.64	0.1	1.06	0.23	-2.01	3.82	2.02	65.53	0.27	2.26	11.21	14.21		-1.90602
		1899-12-31 00:11:47	-2.74	-1.55	0.12	0.85	0.23	-2.01	3.11	2.03	65.62	0.18	1.7	11.31	14.31		-2.10918
		1899-12-31 00:11:47	-2.73	-1.47	0.15	0.65	0.23	-2.01	2.41	2.03	65.7	0.1	1.13	11.41	14.41		-1.86343
		1899-12-31 00:11:48	-2.71	-1.42	0.17	0.45	0.23	-2.01	1.73	2.03	65.76	0.04	0.56	11.51	14.51		-1.81019
		1899-12-31 00:11:48	-2.69	-1.38	0.19	0.25	0.23	-2.01	1.13	2.03	65.8	0	0	11.61	14.61		-1.65509
21	1899-12-31 00:11:36	GlobalTime	X[m]	Y[m]	Vx[m/s]	Vy[m/s]	Ax[m/s2]	Ay[m/s2]	Speed[km/h]	Acceleration[m/s2]	Space[m]				3
		1899-12-31 00:11:36	-2.78	-67.41	0.25	6.36	0.04	0.04	22.91	0.06	0	66.21	66.21	-0.4	2.6
		1899-12-31 00:11:36	-2.76	-66.77	0.25	6.36	0.05	0.05	22.92	0.07	0.64	65.57	66.18	-0.3	2.7		0.0276271
		1899-12-31 00:11:36	-2.73	-66.14	0.26	6.37	0.07	0.06	22.94	0.09	1.27	64.94	66.14	-0.2	2.8		0.0561679
		1899-12-31 00:11:36	-2.7	-65.5	0.26	6.37	0.08	0.07	22.97	0.11	1.91	64.3	66.1	-0.1	2.9		0.0830259
		1899-12-31 00:11:36	-2.68	-64.86	0.27	6.38	0.09	0.09	23	0.12	2.55	63.66	66.04	0	3		0.0831344							23	63.66
		1899-12-31 00:11:36	-2.65	-64.22	0.28	6.39	0.1	0.09	23.03	0.13	3.19	63.02	65.96	0.1	3.1		0.0832429
		1899-12-31 00:11:36	-2.62	-63.58	0.29	6.4	0.1	0.1	23.07	0.15	3.83	62.38	65.87	0.2	3.2		0.111159
		1899-12-31 00:11:36	-2.59	-62.94	0.3	6.41	0.11	0.11	23.11	0.15	4.47	61.74	65.77	0.3	3.3		0.111352
		1899-12-31 00:11:36	-2.56	-62.3	0.31	6.42	0.11	0.12	23.15	0.16	5.12	61.09	65.65	0.4	3.4		0.109829
		1899-12-31 00:11:36	-2.53	-61.65	0.32	6.44	0.11	0.12	23.2	0.17	5.76	60.45	65.51	0.5	3.5		0.139703
		1899-12-31 00:11:37	-2.5	-61.01	0.33	6.45	0.12	0.13	23.24	0.17	6.41	59.8	65.36	0.6	3.6		0.110256
		1899-12-31 00:11:37	-2.46	-60.36	0.35	6.46	0.12	0.13	23.29	0.18	7.05	59.16	65.19	0.7	3.7		0.140245
		1899-12-31 00:11:37	-2.43	-59.71	0.36	6.47	0.12	0.13	23.34	0.18	7.7	58.51	65.01	0.8	3.8		0.138384
		1899-12-31 00:11:37	-2.39	-59.07	0.37	6.49	0.13	0.13	23.39	0.18	8.35	57.86	64.81	0.9	3.9		0.138681
		1899-12-31 00:11:37	-2.35	-58.42	0.38	6.5	0.13	0.14	23.44	0.19	9	57.21	64.6	1	4		0.138978
		1899-12-31 00:11:37	-2.32	-57.76	0.4	6.51	0.13	0.14	23.49	0.19	9.66	56.55	64.37	1.1	4.1		0.137164
		1899-12-31 00:11:37	-2.28	-57.11	0.41	6.53	0.14	0.14	23.55	0.2	10.31	55.9	64.13	1.2	4.2		0.167521
		1899-12-31 00:11:37	-2.23	-56.46	0.42	6.54	0.15	0.14	23.6	0.2	10.97	55.24	63.87	1.3	4.3		0.137807
		1899-12-31 00:11:37	-2.19	-55.8	0.44	6.56	0.15	0.15	23.66	0.21	11.62	54.59	63.6	1.4	4.4		0.168305
		1899-12-31 00:11:37	-2.15	-55.14	0.45	6.57	0.15	0.15	23.71	0.22	12.28	53.93	63.31	1.5	4.5		0.13845
		1899-12-31 00:11:38	-2.1	-54.49	0.47	6.59	0.16	0.16	23.77	0.22	12.94	53.27	63.01	1.6	4.6		0.166526
		1899-12-31 00:11:38	-2.05	-53.83	0.48	6.6	0.16	0.16	23.83	0.22	13.6	52.61	62.69	1.7	4.7		0.166947
		1899-12-31 00:11:38	-2	-53.16	0.5	6.62	0.15	0.17	23.9	0.23	14.27	51.94	62.36	1.8	4.8		0.192389
		1899-12-31 00:11:38	-1.95	-52.5	0.51	6.64	0.14	0.17	23.96	0.22	14.93	51.28	62.01	1.9	4.9		0.167859
		1899-12-31 00:11:38	-1.9	-51.84	0.53	6.65	0.13	0.18	24.03	0.22	15.6	50.61	61.65	2	5		0.193437
		1899-12-31 00:11:38	-1.85	-51.17	0.54	6.67	0.12	0.18	24.1	0.22	16.27	49.94	61.28	2.1	5.1		0.194001
		1899-12-31 00:11:38	-1.79	-50.5	0.55	6.69	0.1	0.19	24.17	0.21	16.94	49.27	60.89	2.2	5.2		0.194565
		1899-12-31 00:11:38	-1.74	-49.83	0.56	6.71	0.07	0.2	24.24	0.21	17.61	48.6	60.49	2.3	5.3		0.19513
		1899-12-31 00:11:38	-1.68	-49.16	0.57	6.73	0.04	0.2	24.31	0.21	18.29	47.92	60.07	2.4	5.4		0.192816
		1899-12-31 00:11:38	-1.62	-48.48	0.57	6.75	0.01	0.21	24.39	0.21	18.96	47.25	59.63	2.5	5.5		0.224341
		1899-12-31 00:11:39	-1.56	-47.81	0.57	6.77	-0.03	0.22	24.46	0.22	19.64	46.57	59.19	2.6	5.6		0.194008
		1899-12-31 00:11:39	-1.51	-47.13	0.57	6.79	-0.07	0.22	24.54	0.23	20.32	45.89	58.72	2.7	5.7		0.222404
		1899-12-31 00:11:39	-1.45	-46.45	0.56	6.81	-0.11	0.22	24.62	0.25	21.01	45.2	58.25	2.8	5.8		0.219896
		1899-12-31 00:11:39	-1.4	-45.76	0.54	6.84	-0.16	0.23	24.69	0.28	21.69	44.52	57.76	2.9	5.9		0.195834
		1899-12-31 00:11:39	-1.34	-45.08	0.53	6.86	-0.2	0.23	24.77	0.3	22.38	43.83	57.25	3	6		0.221238
		1899-12-31 00:11:39	-1.29	-44.39	0.51	6.88	-0.25	0.23	24.85	0.34	23.07	43.14	56.74	3.1	6.1		0.221954
		1899-12-31 00:11:39	-1.24	-43.7	0.48	6.91	-0.29	0.23	24.92	0.37	23.76	42.45	56.2	3.2	6.2		0.194797
		1899-12-31 00:11:39	-1.19	-43.01	0.45	6.93	-0.33	0.23	25	0.4	24.46	41.75	55.66	3.3	6.3		0.220106
		1899-12-31 00:11:39	-1.15	-42.31	0.42	6.95	-0.37	0.22	25.07	0.43	25.15	41.06	55.11	3.4	6.4		0.195971
		1899-12-31 00:11:39	-1.11	-41.61	0.38	6.97	-0.4	0.22	25.14	0.45	25.85	40.36	54.54	3.5	6.5		0.193711
		1899-12-31 00:11:40	-1.08	-40.92	0.34	6.99	-0.43	0.21	25.21	0.48	26.55	39.66	53.96	3.6	6.6		0.194252
		1899-12-31 00:11:40	-1.04	-40.21	0.29	7.02	-0.45	0.2	25.28	0.49	27.25	38.96	53.37	3.7	6.7		0.194792
		1899-12-31 00:11:40	-1.02	-39.51	0.25	7.03	-0.46	0.19	25.34	0.5	27.96	38.25	52.77	3.8	6.8		0.165037
		1899-12-31 00:11:40	-1	-38.81	0.2	7.05	-0.48	0.17	25.4	0.51	28.66	37.55	52.16	3.9	6.9		0.167791
		1899-12-31 00:11:40	-0.98	-38.1	0.15	7.07	-0.48	0.15	25.46	0.5	29.37	36.84	51.54	4	7		0.165819
		1899-12-31 00:11:40	-0.96	-37.39	0.1	7.08	-0.48	0.14	25.51	0.5	30.08	36.13	50.91	4.1	7.1		0.138481
		1899-12-31 00:11:40	-0.96	-36.68	0.06	7.1	-0.48	0.12	25.55	0.49	30.79	35.42	50.28	4.2	7.2		0.110981
		1899-12-31 00:11:40	-0.95	-35.97	0.01	7.11	-0.47	0.09	25.59	0.48	31.5	34.71	49.63	4.3	7.3		0.111155
		1899-12-31 00:11:40	-0.95	-35.26	-0.04	7.12	-0.45	0.07	25.62	0.46	32.21	34	48.98	4.4	7.4		0.08348
		1899-12-31 00:11:40	-0.96	-34.55	-0.08	7.12	-0.43	0.05	25.65	0.44	32.92	33.29	48.33	4.5	7.5		0.0835779
		1899-12-31 00:11:41	-0.97	-33.83	-0.12	7.13	-0.41	0.03	25.66	0.41	33.64	32.57	47.66	4.6	7.6		0.0274938
		1899-12-31 00:11:41	-0.99	-33.12	-0.16	7.13	-0.37	0.01	25.67	0.37	34.35	31.86	46.99	4.7	7.7		0.0278919
		1899-12-31 00:11:41	-1	-32.4	-0.2	7.13	-0.33	-0.01	25.68	0.33	35.06	31.15	46.32	4.8	7.8		0.0279028
		1899-12-31 00:11:41	-1.03	-31.69	-0.23	7.13	-0.29	-0.03	25.67	0.29	35.78	30.43	45.63	4.9	7.9		-0.0275152
		1899-12-31 00:11:41	-1.05	-30.98	-0.26	7.12	-0.24	-0.05	25.66	0.24	36.49	29.72	44.95	5	8		-0.0278919
		1899-12-31 00:11:41	-1.08	-30.27	-0.28	7.12	-0.18	-0.07	25.64	0.2	37.21	29	44.26	5.1	8.1		-0.0549769
		1899-12-31 00:11:41	-1.11	-29.55	-0.3	7.11	-0.12	-0.09	25.62	0.16	37.92	28.29	43.56	5.21	8.21		-0.0557077
		1899-12-31 00:11:41	-1.14	-28.84	-0.31	7.1	-0.06	-0.12	25.58	0.13	38.63	27.58	42.87	5.31	8.31		-0.111285
		1899-12-31 00:11:41	-1.17	-28.13	-0.31	7.09	0	-0.14	25.54	0.14	39.34	26.87	42.17	5.41	8.41		-0.111111
		1899-12-31 00:11:42	-1.2	-27.42	-0.31	7.07	0.07	-0.17	25.48	0.18	40.05	26.16	41.46	5.51	8.51		-0.166341
		1899-12-31 00:11:42	-1.23	-26.72	-0.3	7.05	0.13	-0.2	25.42	0.24	40.76	25.45	40.76	5.61	8.61		-0.165949
		1899-12-31 00:11:42	-1.26	-26.01	-0.29	7.03	0.2	-0.23	25.34	0.3	41.46	24.75	40.05	5.71	8.71		-0.22381
		1899-12-31 00:11:42	-1.29	-25.31	-0.26	7.01	0.26	-0.27	25.25	0.37	42.17	24.04	39.34	5.81	8.81		-0.247408
		1899-12-31 00:11:42	-1.31	-24.61	-0.24	6.98	0.31	-0.31	25.14	0.44	42.87	23.34	38.63	5.91	8.91		-0.305495
		1899-12-31 00:11:42	-1.33	-23.91	-0.2	6.95	0.36	-0.35	25.02	0.51	43.56	22.65	37.92	6.01	9.01		-0.336554
		1899-12-31 00:11:42	-1.35	-23.22	-0.16	6.91	0.41	-0.39	24.89	0.57	44.26	21.95	37.21	6.11	9.11		-0.3576
		1899-12-31 00:11:42	-1.37	-22.53	-0.12	6.87	0.45	-0.44	24.74	0.62	44.95	21.26	36.49	6.21	9.21		-0.416247
		1899-12-31 00:11:42	-1.38	-21.84	-0.08	6.83	0.48	-0.48	24.57	0.68	45.63	20.58	35.78	6.31	9.31		-0.475598
		1899-12-31 00:11:42	-1.38	-21.16	-0.03	6.78	0.5	-0.52	24.39	0.72	46.32	19.89	35.06	6.41	9.41		-0.492754		24.39	19.89	6.41
		1899-12-31 00:11:43	-1.38	-20.49	0.02	6.72	0.51	-0.57	24.2	0.76	46.99	19.22	34.35	6.51	9.51		-0.531607
		1899-12-31 00:11:43	-1.38	-19.82	0.07	6.66	0.52	-0.61	23.99	0.8	47.66	18.55	33.64	6.61	9.61		-0.582729
		1899-12-31 00:11:43	-1.37	-19.15	0.13	6.6	0.52	-0.66	23.77	0.83	48.33	17.88	32.92	6.71	9.71		-0.60503
		1899-12-31 00:11:43	-1.35	-18.49	0.18	6.53	0.51	-0.7	23.53	0.87	48.98	17.23	32.21	6.81	9.81		-0.673789
		1899-12-31 00:11:43	-1.33	-17.84	0.23	6.46	0.49	-0.75	23.28	0.9	49.63	16.58	31.5	6.91	9.91		-0.694593
		1899-12-31 00:11:43	-1.31	-17.2	0.28	6.39	0.47	-0.8	23.01	0.93	50.28	15.93	30.79	7.01	10.01		-0.741827
		1899-12-31 00:11:43	-1.28	-16.57	0.32	6.3	0.44	-0.85	22.72	0.96	50.91	15.3	30.08	7.11	10.11		-0.812126
		1899-12-31 00:11:43	-1.24	-15.94	0.36	6.22	0.4	-0.9	22.42	0.99	51.54	14.67	29.37	7.21	10.21		-0.829292
		1899-12-31 00:11:43	-1.2	-15.32	0.4	6.12	0.36	-0.96	22.1	1.02	52.16	14.05	28.66	7.31	10.31		-0.886499
		1899-12-31 00:11:43	-1.16	-14.71	0.44	6.03	0.32	-1.01	21.75	1.06	52.77	13.44	27.96	7.41	10.41		-0.970673
		1899-12-31 00:11:44	-1.12	-14.11	0.47	5.92	0.27	-1.06	21.39	1.1	53.37	12.84	27.25	7.51	10.51		-0.998611
		1899-12-31 00:11:44	-1.07	-13.53	0.5	5.82	0.22	-1.11	21.01	1.13	53.96	12.25	26.55	7.61	10.61		-1.05357
		1899-12-31 00:11:44	-1.02	-12.95	0.52	5.7	0.17	-1.16	20.62	1.17	54.54	11.67	25.85	7.71	10.71		-1.07996
		1899-12-31 00:11:44	-0.96	-12.38	0.53	5.59	0.12	-1.2	20.2	1.21	55.11	11.1	25.15	7.81	10.81		-1.16041
		1899-12-31 00:11:44	-0.91	-11.83	0.54	5.46	0.07	-1.24	19.77	1.25	55.66	10.55	24.46	7.91	10.91		-1.2056
		1899-12-31 00:11:44	-0.86	-11.29	0.55	5.34	0.02	-1.28	19.32	1.28	56.2	10.01	23.76	8.01	11.01		-1.25675
		1899-12-31 00:11:44	-0.8	-10.76	0.55	5.21	-0.03	-1.32	18.86	1.32	56.74	9.47	23.07	8.11	11.11		-1.25477
		1899-12-31 00:11:44	-0.75	-10.25	0.54	5.08	-0.08	-1.35	18.38	1.35	57.25	8.96	22.38	8.21	11.21		-1.35221
		1899-12-31 00:11:44	-0.69	-9.75	0.53	4.94	-0.13	-1.37	17.89	1.38	57.76	8.45	21.69	8.31	11.31		-1.34443
		1899-12-31 00:11:44	-0.64	-9.26	0.52	4.8	-0.17	-1.4	17.39	1.41	58.25	7.96	21.01	8.41	11.41		-1.38889
		1899-12-31 00:11:45	-0.59	-8.79	0.5	4.66	-0.21	-1.41	16.88	1.43	58.72	7.49	20.32	8.51	11.51		-1.43467
		1899-12-31 00:11:45	-0.54	-8.33	0.48	4.52	-0.24	-1.43	16.36	1.45	59.19	7.02	19.64	8.61	11.61		-1.41883
		1899-12-31 00:11:45	-0.49	-7.88	0.45	4.38	-0.27	-1.44	15.84	1.46	59.63	6.58	18.96	8.71	11.71		-1.46815
		1899-12-31 00:11:45	-0.45	-7.45	0.43	4.23	-0.3	-1.44	15.31	1.47	60.07	6.14	18.29	8.81	11.81		-1.44759
		1899-12-31 00:11:45	-0.41	-7.03	0.4	4.09	-0.32	-1.44	14.79	1.47	60.49	5.72	17.61	8.91	11.91		-1.43776
		1899-12-31 00:11:45	-0.37	-6.63	0.36	3.94	-0.33	-1.44	14.26	1.48	60.89	5.32	16.94	9.01	12.01		-1.485
		1899-12-31 00:11:45	-0.33	-6.24	0.33	3.8	-0.34	-1.44	13.73	1.48	61.28	4.93	16.27	9.11	12.11		-1.4675
		1899-12-31 00:11:45	-0.3	-5.87	0.3	3.66	-0.35	-1.43	13.21	1.47	61.65	4.56	15.6	9.21	12.21		-1.46071
		1899-12-31 00:11:45	-0.28	-5.51	0.26	3.51	-0.35	-1.43	12.68	1.47	62.01	4.2	14.93	9.31	12.31		-1.47052
		1899-12-31 00:11:45	-0.25	-5.17	0.22	3.37	-0.35	-1.43	12.16	1.47	62.36	3.85	14.27	9.41	12.41		-1.42381
		1899-12-31 00:11:46	-0.23	-4.84	0.19	3.23	-0.35	-1.43	11.64	1.47	62.69	3.52	13.6	9.51	12.51		-1.44688
		1899-12-31 00:11:46	-0.21	-4.52	0.15	3.08	-0.34	-1.43	11.12	1.47	63.01	3.2	12.94	9.61	12.61		-1.42689
		1899-12-31 00:11:46	-0.2	-4.22	0.12	2.94	-0.33	-1.44	10.6	1.48	63.31	2.9	12.28	9.71	12.71		-1.45247
		1899-12-31 00:11:46	-0.19	-3.93	0.09	2.8	-0.32	-1.45	10.07	1.48	63.6	2.61	11.62	9.81	12.81		-1.45742
		1899-12-31 00:11:46	-0.18	-3.66	0.06	2.65	-0.31	-1.46	9.54	1.49	63.87	2.34	10.97	9.91	12.91		-1.4851
		1899-12-31 00:11:46	-0.18	-3.4	0.03	2.5	-0.29	-1.48	9.01	1.5	64.13	2.08	10.31	10.01	13.01		-1.45885
		1899-12-31 00:11:46	-0.18	-3.16	0	2.36	-0.27	-1.49	8.48	1.52	64.37	1.84	9.66	10.11	13.11		-1.49011
		1899-12-31 00:11:46	-0.18	-2.93	-0.03	2.21	-0.26	-1.51	7.94	1.53	64.6	1.61	9	10.21	13.21		-1.48732
		1899-12-31 00:11:46	-0.18	-2.72	-0.05	2.05	-0.24	-1.53	7.4	1.54	64.81	1.4	8.35	10.31	13.31		-1.52183
		1899-12-31 00:11:46	-0.19	-2.52	-0.08	1.9	-0.23	-1.54	6.85	1.56	65.01	1.2	7.7	10.41	13.41		-1.51186
		1899-12-31 00:11:47	-0.2	-2.34	-0.1	1.75	-0.21	-1.56	6.3	1.57	65.19	1.02	7.05	10.51	13.51		-1.55018
		1899-12-31 00:11:47	-0.21	-2.17	-0.12	1.59	-0.2	-1.57	5.74	1.59	65.36	0.85	6.41	10.61	13.61		-1.53014
		1899-12-31 00:11:47	-0.22	-2.02	-0.14	1.43	-0.19	-1.59	5.18	1.6	65.51	0.7	5.76	10.71	13.71		-1.57284
		1899-12-31 00:11:47	-0.24	-1.88	-0.16	1.27	-0.18	-1.6	4.62	1.61	65.65	0.56	5.12	10.81	13.81		-1.51235
		1899-12-31 00:11:47	-0.25	-1.76	-0.18	1.11	-0.17	-1.6	4.05	1.61	65.77	0.44	4.47	10.91	13.91		-1.58883
		1899-12-31 00:11:47	-0.27	-1.66	-0.19	0.95	-0.17	-1.61	3.5	1.62	65.87	0.34	3.83	11.01	14.01		-1.60204
		1899-12-31 00:11:47	-0.29	-1.57	-0.21	0.79	-0.16	-1.61	2.94	1.62	65.96	0.25	3.19	11.11	14.11		-1.54595
		1899-12-31 00:11:47	-0.32	-1.5	-0.23	0.63	-0.16	-1.62	2.41	1.62	66.04	0.17	2.55	11.21	14.21		-1.36743
		1899-12-31 00:11:47	-0.34	-1.45	-0.24	0.47	-0.16	-1.62	1.9	1.62	66.1	0.11	1.91	11.31	14.31		-1.41339
		1899-12-31 00:11:47	-0.36	-1.41	-0.26	0.31	-0.16	-1.62	1.44	1.63	66.14	0.07	1.27	11.41	14.41		-1.48187
		1899-12-31 00:11:48	-0.39	-1.39	-0.27	0.14	-0.16	-1.62	1.12	1.63	66.18	0.03	0.64	11.51	14.51		-0.790123
		1899-12-31 00:11:48	-0.42	-1.38	-0.29	-0.02	-0.16	-1.62	1.05	1.63	66.21	0	0	11.61	14.61		-0.195345
22	1899-12-31 00:11:36	GlobalTime	X[m]	Y[m]	Vx[m/s]	Vy[m/s]	Ax[m/s2]	Ay[m/s2]	Speed[km/h]	Acceleration[m/s2]	Space[m]				3
		1899-12-31 00:11:35	-1.38	-68.59	-0.04	4.4	-0.03	-0.04	15.83	0.05	0	52.59	52.59	-1	2
		1899-12-31 00:11:35	-1.39	-68.15	-0.05	4.39	-0.04	-0.05	15.81	0.06	0.44	52.15	52.55	-0.9	2.1		-0.0554854
		1899-12-31 00:11:35	-1.39	-67.71	-0.05	4.39	-0.05	-0.06	15.79	0.08	0.88	51.71	52.51	-0.8	2.2		-0.0554153
		1899-12-31 00:11:35	-1.39	-67.27	-0.05	4.38	-0.05	-0.08	15.77	0.09	1.32	51.27	52.47	-0.7	2.3		-0.0553451
		1899-12-31 00:11:35	-1.4	-66.83	-0.06	4.37	-0.06	-0.09	15.74	0.11	1.76	50.83	52.42	-0.6	2.4		-0.0828862
		1899-12-31 00:11:35	-1.41	-66.39	-0.07	4.36	-0.07	-0.1	15.7	0.12	2.19	50.4	52.36	-0.5	2.5		-0.112834
		1899-12-31 00:11:36	-1.41	-65.96	-0.07	4.35	-0.08	-0.12	15.67	0.14	2.63	49.96	52.3	-0.4	2.6		-0.0825179
		1899-12-31 00:11:36	-1.42	-65.52	-0.08	4.34	-0.09	-0.13	15.62	0.16	3.06	49.53	52.24	-0.3	2.7		-0.140369
		1899-12-31 00:11:36	-1.43	-65.09	-0.09	4.33	-0.1	-0.15	15.58	0.18	3.5	49.09	52.17	-0.2	2.8		-0.109428
		1899-12-31 00:11:36	-1.44	-64.66	-0.1	4.31	-0.11	-0.16	15.52	0.19	3.93	48.66	52.1	-0.1	2.9		-0.16742
		1899-12-31 00:11:36	-1.45	-64.23	-0.11	4.29	-0.11	-0.18	15.46	0.21	4.36	48.23	52.02	0	3		-0.166774							15.46	48.23
		1899-12-31 00:11:36	-1.46	-63.8	-0.12	4.28	-0.12	-0.19	15.4	0.22	4.79	47.8	51.94	0.1	3.1		-0.166128
		1899-12-31 00:11:36	-1.48	-63.37	-0.14	4.26	-0.12	-0.2	15.33	0.24	5.22	47.37	51.85	0.2	3.2		-0.193
		1899-12-31 00:11:36	-1.49	-62.94	-0.15	4.24	-0.12	-0.22	15.26	0.25	5.64	46.95	51.76	0.3	3.3		-0.196695
		1899-12-31 00:11:36	-1.51	-62.52	-0.16	4.21	-0.12	-0.23	15.18	0.26	6.07	46.52	51.67	0.4	3.4		-0.21849
		1899-12-31 00:11:36	-1.52	-62.1	-0.17	4.19	-0.11	-0.24	15.1	0.27	6.49	46.1	51.57	0.5	3.5		-0.222516
		1899-12-31 00:11:37	-1.54	-61.68	-0.18	4.17	-0.11	-0.25	15.01	0.27	6.91	45.68	51.46	0.6	3.6		-0.248925		15.01	45.68	-0.7
		1899-12-31 00:11:37	-1.56	-61.27	-0.19	4.14	-0.1	-0.26	14.92	0.28	7.32	45.27	51.35	0.7	3.7		-0.253472
		1899-12-31 00:11:37	-1.58	-60.85	-0.2	4.12	-0.1	-0.26	14.83	0.28	7.74	44.85	51.24	0.8	3.8		-0.245949
		1899-12-31 00:11:37	-1.6	-60.44	-0.21	4.09	-0.09	-0.26	14.74	0.28	8.15	44.44	51.12	0.9	3.9		-0.250423
		1899-12-31 00:11:37	-1.62	-60.04	-0.22	4.06	-0.08	-0.27	14.65	0.28	8.56	44.03	50.99	1	4		-0.248899
		1899-12-31 00:11:37	-1.64	-59.63	-0.23	4.04	-0.08	-0.27	14.55	0.28	8.96	43.63	50.86	1.1	4.1		-0.281636
		1899-12-31 00:11:37	-1.67	-59.23	-0.24	4.01	-0.07	-0.26	14.46	0.27	9.36	43.23	50.73	1.2	4.2		-0.251823
		1899-12-31 00:11:37	-1.69	-58.83	-0.24	3.98	-0.06	-0.26	14.36	0.27	9.77	42.82	50.58	1.3	4.3		-0.271191
		1899-12-31 00:11:37	-1.72	-58.43	-0.25	3.96	-0.06	-0.26	14.27	0.26	10.16	42.43	50.44	1.4	4.4		-0.254897
		1899-12-31 00:11:37	-1.74	-58.04	-0.26	3.93	-0.05	-0.25	14.18	0.26	10.56	42.03	50.28	1.5	4.5		-0.246962
		1899-12-31 00:11:38	-1.77	-57.64	-0.26	3.91	-0.05	-0.25	14.09	0.26	10.95	41.64	50.12	1.6	4.6		-0.251692
		1899-12-31 00:11:38	-1.79	-57.25	-0.26	3.88	-0.04	-0.25	14	0.25	11.34	41.25	49.96	1.7	4.7		-0.250089
[truncated: 2,678 more rows]
