# Supplementary material for: Determining E-Bike Drivers’ Decision-Making Mechanisms during Signal Change Interval Using the Hidden Markov Driving Model
Source: Hindawi journal article supplement (doi:10.1155/2019/7341097), 2019-04-07
Supplement: f1 [file 7341097.f1.zip › 7341097.f1/Supplementary Material 2_e-bike trajectories_pass samples.xls]

## Sheet: pass samples
	（1）绿色代表绿灯倒计时3s;（2）紫色表示停车线时刻；（3）黄色代表黄灯时刻；（4）红色代表红灯时刻																	Decision time			Flashing Green		Yellow light
	黄灯启亮时间
1	1899-12-31 23:01:41	GlobalTime	X[m]	Y[m]	Vx[m/s]	Vy[m/s]	Ax[m/s2]	Ay[m/s2]	Speed[km/h]	Acceleration[m/s2]	Space[m]	Distance to stop-line		Time difference		Acceleration difference
		1899-12-31 23:01:33	3.03	-35.22	0.33	7.32	-0.06	0.02	26.38	0.06	0	35.63	54.05	-7.45	-4.45
		1899-12-31 23:01:33	3.06	-34.49	0.33	7.32	-0.08	0.03	26.39	0.08	0.73	34.9	53.42	-7.35	-4.35	0.0278888
		1899-12-31 23:01:33	3.09	-33.75	0.32	7.33	-0.1	0.03	26.4	0.1	1.47	34.16	52.8	-7.25	-4.25	0.0275223
		1899-12-31 23:01:33	3.13	-33.02	0.31	7.33	-0.11	0.04	26.41	0.12	2.2	33.43	52.19	-7.15	-4.15	0.0279099
		1899-12-31 23:01:33	3.16	-32.29	0.3	7.33	-0.13	0.04	26.42	0.14	2.93	32.7	51.58	-7.05	-4.05	0.0279205
		1899-12-31 23:01:34	3.18	-31.55	0.28	7.34	-0.15	0.05	26.44	0.15	3.67	31.96	50.98	-6.95	-3.95	0.0551176
		1899-12-31 23:01:34	3.21	-30.82	0.27	7.34	-0.16	0.05	26.45	0.17	4.4	31.23	50.38	-6.85	-3.85	0.0279522
		1899-12-31 23:01:34	3.24	-30.09	0.25	7.35	-0.17	0.05	26.47	0.18	5.14	30.49	49.8	-6.75	-3.75	0.0551802
		1899-12-31 23:01:34	3.26	-29.35	0.23	7.35	-0.19	0.05	26.48	0.19	5.87	29.76	49.22	-6.65	-3.65	0.0279839
		1899-12-31 23:01:34	3.28	-28.62	0.21	7.36	-0.2	0.05	26.5	0.2	6.61	29.02	48.64	-6.55	-3.55	0.0552427
		1899-12-31 23:01:34	3.3	-27.88	0.19	7.36	-0.21	0.04	26.51	0.21	7.34	28.29	48.08	-6.45	-3.45	0.0280156
		1899-12-31 23:01:34	3.32	-27.14	0.17	7.37	-0.21	0.04	26.53	0.22	8.08	27.55	47.52	-6.35	-3.35	0.0553053
		1899-12-31 23:01:34	3.34	-26.41	0.15	7.37	-0.22	0.03	26.54	0.22	8.82	26.81	46.96	-6.25	-3.25	0.0276683
		1899-12-31 23:01:34	3.35	-25.67	0.13	7.37	-0.22	0.02	26.54	0.22	9.56	26.07	46.41	-6.15	-3.15	0
		1899-12-31 23:01:34	3.37	-24.93	0.11	7.37	-0.22	0.01	26.55	0.22	10.29	25.34	45.87	-6.05	-3.05	0.0280579
		1899-12-31 23:01:35	3.38	-24.19	0.09	7.37	-0.22	0	26.55	0.22	11.03	24.6	45.33	-5.95	-2.95	0
		1899-12-31 23:01:35	3.38	-23.46	0.06	7.37	-0.21	-0.02	26.55	0.22	11.77	23.86	44.79	-5.85	-2.85	0
		1899-12-31 23:01:35	3.39	-22.72	0.04	7.37	-0.21	-0.03	26.54	0.21	12.5	23.13	44.26	-5.75	-2.75	-0.0280579
		1899-12-31 23:01:35	3.39	-21.98	0.02	7.37	-0.2	-0.05	26.52	0.21	13.24	22.39	43.73	-5.65	-2.65	-0.0553262
		1899-12-31 23:01:35	3.39	-21.25	0	7.36	-0.19	-0.07	26.5	0.2	13.98	21.65	43.2	-5.55	-2.55	-0.0552845
		1899-12-31 23:01:35	3.39	-20.51	-0.02	7.35	-0.18	-0.1	26.47	0.2	14.71	20.92	42.68	-5.45	-2.45	-0.0839834
		1899-12-31 23:01:35	3.39	-19.78	-0.03	7.34	-0.16	-0.12	26.43	0.2	15.45	20.18	42.15	-5.35	-2.35	-0.110319
		1899-12-31 23:01:35	3.39	-19.04	-0.05	7.33	-0.15	-0.15	26.39	0.21	16.18	19.45	41.62	-5.25	-2.25	-0.111661
		1899-12-31 23:01:35	3.38	-18.31	-0.06	7.31	-0.13	-0.17	26.33	0.22	16.91	18.72	41.1	-5.15	-2.15	-0.167174
		1899-12-31 23:01:35	3.37	-17.58	-0.07	7.3	-0.11	-0.2	26.27	0.23	17.65	17.98	40.57	-5.05	-2.05	-0.16454
		1899-12-31 23:01:36	3.37	-16.85	-0.09	7.28	-0.09	-0.23	26.19	0.25	18.37	17.26	40.04	-4.95	-1.95	-0.22488
		1899-12-31 23:01:36	3.36	-16.12	-0.09	7.25	-0.07	-0.26	26.11	0.27	19.1	16.53	39.5	-4.85	-1.85	-0.221123
		1899-12-31 23:01:36	3.35	-15.4	-0.1	7.22	-0.05	-0.29	26.01	0.3	19.82	15.81	38.96	-4.75	-1.75	-0.279278
		1899-12-31 23:01:36	3.34	-14.68	-0.1	7.19	-0.03	-0.33	25.9	0.33	20.54	15.09	38.42	-4.65	-1.65	-0.305968
		1899-12-31 23:01:36	3.33	-13.96	-0.11	7.16	-0.01	-0.36	25.78	0.36	21.26	14.37	37.87	-4.55	-1.55	-0.332305
		1899-12-31 23:01:36	3.32	-13.25	-0.11	7.12	0.01	-0.39	25.64	0.39	21.98	13.65	37.32	-4.45	-1.45	-0.385738
		1899-12-31 23:01:36	3.3	-12.54	-0.1	7.08	0.03	-0.43	25.5	0.43	22.69	12.94	36.76	-4.35	-1.35	-0.389041
		1899-12-31 23:01:36	3.29	-11.83	-0.1	7.04	0.05	-0.46	25.34	0.46	23.39	12.24	36.2	-4.25	-1.25	-0.448325
		1899-12-31 23:01:36	3.28	-11.13	-0.09	6.99	0.07	-0.49	25.17	0.5	24.1	11.53	35.63	-4.15	-1.15	-0.466587
		1899-12-31 23:01:36	3.28	-10.43	-0.09	6.94	0.08	-0.53	24.99	0.53	24.79	10.84	35.05	-4.05	-1.05	-0.504831
		1899-12-31 23:01:37	3.27	-9.74	-0.08	6.89	0.1	-0.56	24.79	0.57	25.48	10.15	34.47	-3.95	-0.95	-0.556674
		1899-12-31 23:01:37	3.26	-9.06	-0.07	6.83	0.11	-0.59	24.59	0.6	26.17	9.46	33.87	-3.85	-0.85	-0.552201
		1899-12-31 23:01:37	3.25	-8.38	-0.06	6.77	0.12	-0.62	24.37	0.63	26.85	8.78	33.27	-3.75	-0.75	-0.611111
		1899-12-31 23:01:37	3.25	-7.7	-0.04	6.71	0.13	-0.65	24.15	0.66	27.52	8.11	32.66	-3.65	-0.65	-0.614658
		1899-12-31 23:01:37	3.25	-7.04	-0.03	6.64	0.14	-0.67	23.91	0.69	28.19	7.44	32.05	-3.55	-0.55	-0.664179
		1899-12-31 23:01:37	3.24	-6.37	-0.02	6.57	0.14	-0.7	23.66	0.71	28.85	6.78	31.42	-3.45	-0.45	-0.695175
		1899-12-31 23:01:37	3.24	-5.72	0	6.5	0.14	-0.72	23.41	0.74	29.5	6.13	30.79	-3.35	-0.35	-0.698451
		1899-12-31 23:01:37	3.24	-5.07	0.01	6.43	0.14	-0.74	23.15	0.75	30.15	5.48	30.15	-3.25	-0.25	-0.718519
		1899-12-31 23:01:37	3.24	-4.43	0.03	6.35	0.14	-0.76	22.88	0.77	30.79	4.84	29.5	-3.15	-0.15	-0.749186					22.88	4.84
		1899-12-31 23:01:37	3.25	-3.8	0.04	6.28	0.14	-0.77	22.6	0.78	31.42	4.21	28.85	-3.05	-0.05	-0.779835
		1899-12-31 23:01:38	3.25	-3.18	0.05	6.2	0.13	-0.78	22.33	0.79	32.05	3.58	28.19	-2.95	0.05	-0.74289
		1899-12-31 23:01:38	3.26	-2.56	0.07	6.12	0.12	-0.78	22.05	0.79	32.66	2.97	27.52	-2.85	0.15	-0.785924
		1899-12-31 23:01:38	3.27	-1.95	0.08	6.05	0.12	-0.78	21.77	0.79	33.27	2.36	26.85	-2.75	0.25	-0.776007
		1899-12-31 23:01:38	3.27	-1.35	0.09	5.97	0.11	-0.77	21.49	0.78	33.87	1.76	26.17	-2.65	0.35	-0.778858
		1899-12-31 23:01:38	3.28	-0.76	0.1	5.89	0.1	-0.75	21.21	0.76	34.47	1.16	25.48	-2.55	0.45	-0.768776
		1899-12-31 23:01:38	3.29	-0.18	0.11	5.82	0.08	-0.73	20.95	0.73	35.05	0.58	24.79	-2.45	0.55	-0.72914
		1899-12-31 23:01:38	3.3	0.4	0.12	5.75	0.07	-0.7	20.69	0.7	35.63	0	24.1	-2.35	0.65	-0.720147
		1899-12-31 23:01:38	3.32	0.97	0.12	5.68	0.06	-0.66	20.44	0.67	36.2	-0.57	23.39	-2.25	0.75	-0.695967
		1899-12-31 23:01:38	3.33	1.54	0.13	5.61	0.05	-0.62	20.21	0.63	36.76	-1.13	22.69	-2.15	0.85	-0.644118
		1899-12-31 23:01:38	3.34	2.1	0.13	5.55	0.03	-0.58	19.99	0.58	37.32	-1.69	21.98	-2.05	0.95	-0.609292
		1899-12-31 23:01:39	3.36	2.65	0.14	5.49	0.02	-0.53	19.79	0.53	37.87	-2.24	21.26	-1.95	1.05	-0.558081
		1899-12-31 23:01:39	3.37	3.2	0.14	5.44	0.01	-0.47	19.6	0.47	38.42	-2.79	20.54	-1.85	1.15	-0.524979
		1899-12-31 23:01:39	3.38	3.74	0.14	5.4	0	-0.41	19.44	0.41	38.96	-3.33	19.82	-1.75	1.25	-0.446273
		1899-12-31 23:01:39	3.4	4.28	0.14	5.36	-0.01	-0.35	19.3	0.35	39.5	-3.87	19.1	-1.65	1.35	-0.387489
		1899-12-31 23:01:39	3.41	4.81	0.14	5.33	-0.03	-0.28	19.18	0.29	40.04	-4.41	18.37	-1.55	1.45	-0.329904
		1899-12-31 23:01:39	3.42	5.34	0.13	5.3	-0.04	-0.22	19.09	0.22	40.57	-4.94	17.65	-1.45	1.55	-0.250721
		1899-12-31 23:01:39	3.44	5.87	0.13	5.28	-0.04	-0.15	19.02	0.16	41.1	-5.47	16.91	-1.35	1.65	-0.19419
		1899-12-31 23:01:39	3.45	6.4	0.12	5.27	-0.05	-0.08	18.97	0.1	41.62	-5.99	16.18	-1.25	1.75	-0.140929
		1899-12-31 23:01:39	3.46	6.92	0.12	5.26	-0.06	-0.01	18.95	0.06	42.15	-6.52	15.45	-1.15	1.85	-0.0552061
		1899-12-31 23:01:39	3.47	7.45	0.11	5.26	-0.07	0.06	18.95	0.09	42.68	-7.05	14.71	-1.05	1.95	0
		1899-12-31 23:01:40	3.48	7.98	0.11	5.27	-0.07	0.13	18.98	0.15	43.2	-7.57	13.98	-0.95	2.05	0.084424
		1899-12-31 23:01:40	3.5	8.5	0.1	5.29	-0.08	0.2	19.03	0.21	43.73	-8.1	13.24	-0.85	2.15	0.138343
		1899-12-31 23:01:40	3.5	9.03	0.09	5.31	-0.08	0.27	19.11	0.28	44.26	-8.63	12.5	-0.75	2.25	0.222106
		1899-12-31 23:01:40	3.51	9.57	0.08	5.34	-0.09	0.34	19.22	0.35	44.79	-9.16	11.77	-0.65	2.35	0.306917
		1899-12-31 23:01:40	3.52	10.1	0.07	5.37	-0.09	0.4	19.34	0.41	45.33	-9.7	11.03	-0.55	2.45	0.33059
		1899-12-31 23:01:40	3.53	10.64	0.06	5.41	-0.1	0.46	19.5	0.47	45.87	-10.24	10.29	-0.45	2.55	0.443987
		1899-12-31 23:01:40	3.53	11.18	0.05	5.46	-0.1	0.52	19.67	0.53	46.41	-10.78	9.56	-0.35	2.65	0.475744
		1899-12-31 23:01:40	3.54	11.73	0.04	5.52	-0.11	0.56	19.86	0.57	46.96	-11.33	8.82	-0.25	2.75	0.526845
		1899-12-31 23:01:40	3.54	12.29	0.03	5.57	-0.11	0.6	20.07	0.61	47.52	-11.89	8.08	-0.15	2.85	0.577691
		1899-12-31 23:01:40	3.54	12.85	0.02	5.64	-0.12	0.63	20.29	0.64	48.08	-12.45	7.34	-0.05	2.95	0.611717
		1899-12-31 23:01:41	3.55	13.42	0.01	5.7	-0.12	0.66	20.52	0.67	48.64	-13.01	6.61	0.05	3.05	0.646653							20.52	-13.01
		1899-12-31 23:01:41	3.55	13.99	0	5.77	-0.12	0.68	20.76	0.69	49.22	-13.59	5.87	0.15	3.15	0.659004
		1899-12-31 23:01:41	3.55	14.57	-0.02	5.83	-0.13	0.69	21	0.7	49.8	-14.17	5.14	0.25	3.25	0.666667
		1899-12-31 23:01:41	3.54	15.16	-0.03	5.9	-0.13	0.7	21.25	0.71	50.38	-14.75	4.4	0.35	3.35	0.702593
		1899-12-31 23:01:41	3.54	15.75	-0.04	5.97	-0.13	0.71	21.51	0.72	50.98	-15.35	3.67	0.45	3.45	0.714866
		1899-12-31 23:01:41	3.53	16.35	-0.05	6.04	-0.13	0.71	21.76	0.72	51.58	-15.95	2.93	0.55	3.55	0.69557
		1899-12-31 23:01:41	3.53	16.96	-0.07	6.12	-0.13	0.72	22.02	0.73	52.19	-16.56	2.2	0.65	3.65	0.71992
		1899-12-31 23:01:41	3.52	17.57	-0.08	6.19	-0.13	0.72	22.28	0.73	52.8	-17.17	1.47	0.75	3.75	0.728471
		1899-12-31 23:01:41	3.51	18.2	-0.09	6.26	-0.13	0.72	22.54	0.73	53.42	-17.79	0.73	0.85	3.85	0.725134
		1899-12-31 23:01:41	3.5	18.83	-0.11	6.33	-0.13	0.72	22.8	0.73	54.05	-18.42	0	0.95	3.95	0.721904
2	1899-12-31 23:05:15	GlobalTime	X[m]	Y[m]	Vx[m/s]	Vy[m/s]	Ax[m/s2]	Ay[m/s2]	Speed[km/h]	Acceleration[m/s2]	Space[m]				3
		1899-12-31 23:05:06	1.9	-36.06	-0.26	8.07	0.04	-0.05	29.08	0.07	0	36.28	57.45	-8.45	-5.45
		1899-12-31 23:05:06	1.88	-35.25	-0.25	8.07	0.06	-0.07	29.06	0.09	0.81	35.47	56.64	-8.35	-5.35	-0.0553841
		1899-12-31 23:05:06	1.85	-34.44	-0.25	8.06	0.07	-0.08	29.03	0.11	1.61	34.67	55.82	-8.25	-5.25	-0.0840422
		1899-12-31 23:05:06	1.83	-33.64	-0.24	8.05	0.09	-0.1	29	0.13	2.42	33.86	55	-8.15	-5.15	-0.082919
		1899-12-31 23:05:06	1.8	-32.83	-0.23	8.04	0.1	-0.11	28.96	0.15	3.23	33.05	54.19	-8.05	-5.05	-0.110425
		1899-12-31 23:05:07	1.78	-32.03	-0.22	8.03	0.11	-0.13	28.92	0.17	4.03	32.25	53.37	-7.95	-4.95	-0.111651
		1899-12-31 23:05:07	1.76	-31.23	-0.21	8.02	0.12	-0.14	28.87	0.19	4.83	31.45	52.55	-7.85	-4.85	-0.139347
		1899-12-31 23:05:07	1.74	-30.42	-0.19	8	0.14	-0.15	28.82	0.2	5.63	30.65	51.73	-7.75	-4.75	-0.139106
		1899-12-31 23:05:07	1.72	-29.63	-0.18	7.99	0.15	-0.16	28.76	0.22	6.43	29.85	50.92	-7.65	-4.65	-0.166609
		1899-12-31 23:05:07	1.7	-28.83	-0.17	7.97	0.16	-0.17	28.7	0.23	7.23	29.05	50.1	-7.55	-4.55	-0.166262
		1899-12-31 23:05:07	1.69	-28.03	-0.15	7.95	0.17	-0.18	28.64	0.24	8.03	28.25	49.28	-7.45	-4.45	-0.165914
		1899-12-31 23:05:07	1.67	-27.24	-0.13	7.94	0.18	-0.18	28.57	0.25	8.82	27.46	48.47	-7.35	-4.35	-0.195573
		1899-12-31 23:05:07	1.66	-26.44	-0.11	7.92	0.19	-0.18	28.51	0.26	9.61	26.67	47.65	-7.25	-4.25	-0.167253
		1899-12-31 23:05:07	1.65	-25.65	-0.09	7.9	0.2	-0.18	28.44	0.27	10.41	25.87	46.83	-7.15	-4.15	-0.19225
		1899-12-31 23:05:07	1.64	-24.86	-0.08	7.88	0.2	-0.18	28.38	0.27	11.2	25.08	46.02	-7.05	-4.05	-0.166491
		1899-12-31 23:05:08	1.64	-24.08	-0.05	7.86	0.21	-0.17	28.31	0.27	11.98	24.3	45.2	-6.95	-3.95	-0.196279
		1899-12-31 23:05:08	1.63	-23.29	-0.03	7.85	0.22	-0.16	28.25	0.27	12.77	23.51	44.38	-6.85	-3.85	-0.165729
		1899-12-31 23:05:08	1.63	-22.51	-0.01	7.83	0.22	-0.15	28.19	0.27	13.55	22.73	43.57	-6.75	-3.75	-0.167498
		1899-12-31 23:05:08	1.63	-21.72	0.01	7.82	0.23	-0.14	28.14	0.27	14.33	21.95	42.75	-6.65	-3.65	-0.139309
		1899-12-31 23:05:08	1.63	-20.94	0.03	7.8	0.23	-0.13	28.09	0.27	15.12	21.16	41.94	-6.55	-3.55	-0.137302
		1899-12-31 23:05:08	1.64	-20.16	0.06	7.79	0.23	-0.12	28.04	0.26	15.89	20.39	41.13	-6.45	-3.45	-0.140617
		1899-12-31 23:05:08	1.64	-19.39	0.08	7.78	0.24	-0.1	28	0.26	16.67	19.61	40.32	-6.35	-3.35	-0.110874
		1899-12-31 23:05:08	1.65	-18.61	0.1	7.77	0.24	-0.08	27.97	0.25	17.45	18.83	39.51	-6.25	-3.25	-0.0830514
		1899-12-31 23:05:08	1.66	-17.83	0.13	7.76	0.24	-0.07	27.94	0.25	18.23	18.05	38.7	-6.15	-3.15	-0.0829624
		1899-12-31 23:05:08	1.68	-17.06	0.15	7.75	0.23	-0.05	27.92	0.24	19	17.28	37.89	-6.05	-3.05	-0.0559764
		1899-12-31 23:05:09	1.69	-16.28	0.17	7.75	0.23	-0.03	27.91	0.23	19.78	16.5	37.08	-5.95	-2.95	-0.0276146
		1899-12-31 23:05:09	1.71	-15.51	0.2	7.75	0.23	-0.01	27.9	0.23	20.55	15.73	36.28	-5.85	-2.85	-0.0279632
		1899-12-31 23:05:09	1.73	-14.73	0.22	7.75	0.22	0.01	27.91	0.22	21.33	14.95	35.47	-5.75	-2.75	0.0276047
		1899-12-31 23:05:09	1.76	-13.96	0.24	7.75	0.21	0.03	27.91	0.22	22.1	14.18	34.67	-5.65	-2.65	0
		1899-12-31 23:05:09	1.78	-13.18	0.26	7.75	0.2	0.05	27.93	0.21	22.88	13.4	33.87	-5.55	-2.55	0.055239
		1899-12-31 23:05:09	1.81	-12.41	0.28	7.76	0.19	0.07	27.95	0.21	23.66	12.62	33.08	-5.45	-2.45	0.0552786
		1899-12-31 23:05:09	1.84	-11.63	0.3	7.77	0.18	0.09	27.98	0.2	24.43	11.85	32.28	-5.35	-2.35	0.0840699
		1899-12-31 23:05:09	1.87	-10.85	0.32	7.78	0.17	0.11	28.02	0.2	25.21	11.07	31.49	-5.25	-2.25	0.110795
		1899-12-31 23:05:09	1.9	-10.07	0.34	7.79	0.15	0.13	28.07	0.2	25.99	10.29	30.7	-5.15	-2.15	0.138716
		1899-12-31 23:05:09	1.94	-9.29	0.35	7.8	0.13	0.15	28.12	0.2	26.77	9.51	29.91	-5.05	-2.05	0.138963
		1899-12-31 23:05:10	1.97	-8.51	0.36	7.82	0.12	0.16	28.17	0.2	27.55	8.73	29.12	-4.95	-1.95	0.13921
		1899-12-31 23:05:10	2.01	-7.73	0.37	7.83	0.1	0.18	28.24	0.2	28.34	7.94	28.34	-4.85	-1.85	0.192838
		1899-12-31 23:05:10	2.05	-6.95	0.38	7.85	0.08	0.19	28.3	0.2	29.12	7.16	27.55	-4.75	-1.75	0.167794
		1899-12-31 23:05:10	2.09	-6.16	0.39	7.87	0.06	0.2	28.37	0.2	29.91	6.37	26.77	-4.65	-1.65	0.193727
		1899-12-31 23:05:10	2.12	-5.37	0.4	7.89	0.03	0.2	28.44	0.21	30.7	5.58	25.99	-4.55	-1.55	0.194205
		1899-12-31 23:05:10	2.16	-4.58	0.4	7.91	0.01	0.21	28.52	0.21	31.49	4.79	25.21	-4.45	-1.45	0.222535
		1899-12-31 23:05:10	2.2	-3.79	0.4	7.93	-0.01	0.21	28.59	0.21	32.28	4	24.43	-4.35	-1.35	0.195231
		1899-12-31 23:05:10	2.24	-3	0.4	7.95	-0.03	0.21	28.67	0.21	33.08	3.2	23.66	-4.25	-1.25	0.22091
		1899-12-31 23:05:10	2.28	-2.2	0.39	7.97	-0.06	0.2	28.74	0.21	33.87	2.41	22.88	-4.15	-1.15	0.196256
		1899-12-31 23:05:10	2.32	-1.4	0.39	7.99	-0.08	0.2	28.81	0.21	34.67	1.61	22.1	-4.05	-1.05	0.194276
		1899-12-31 23:05:11	2.36	-0.6	0.38	8.01	-0.1	0.19	28.88	0.21	35.47	0.81	21.33	-3.95	-0.95	0.194748
		1899-12-31 23:05:11	2.4	0.2	0.37	8.03	-0.12	0.18	28.94	0.21	36.28	0	20.55	-3.85	-0.85	0.165238
		1899-12-31 23:05:11	2.43	1.01	0.35	8.05	-0.14	0.16	29	0.22	37.08	-0.8	19.78	-3.75	-0.75	0.16765
		1899-12-31 23:05:11	2.47	1.81	0.34	8.06	-0.16	0.15	29.06	0.22	37.89	-1.61	19	-3.65	-0.65	0.165924
		1899-12-31 23:05:11	2.5	2.62	0.32	8.08	-0.18	0.14	29.11	0.23	38.7	-2.42	18.23	-3.55	-0.55	0.138532
		1899-12-31 23:05:11	2.53	3.43	0.3	8.09	-0.2	0.13	29.16	0.24	39.51	-3.23	17.45	-3.45	-0.45	0.13877
		1899-12-31 23:05:11	2.56	4.24	0.28	8.11	-0.21	0.12	29.2	0.24	40.32	-4.04	16.67	-3.35	-0.35	0.111187
		1899-12-31 23:05:11	2.59	5.05	0.26	8.12	-0.23	0.11	29.24	0.25	41.13	-4.85	15.89	-3.25	-0.25	0.11134
		1899-12-31 23:05:11	2.61	5.86	0.24	8.13	-0.24	0.09	29.27	0.26	41.94	-5.66	15.12	-3.15	-0.15	0.0836048
		1899-12-31 23:05:11	2.64	6.67	0.21	8.14	-0.26	0.08	29.3	0.27	42.75	-6.47	14.33	-3.05	-0.05	0.0836906					29.3	-6.47
		1899-12-31 23:05:12	2.66	7.49	0.19	8.14	-0.27	0.07	29.33	0.28	43.57	-7.29	13.55	-2.95	0.05	0.0827546
		1899-12-31 23:05:12	2.67	8.3	0.16	8.15	-0.28	0.06	29.35	0.29	44.38	-8.1	12.77	-2.85	0.15	0.0558985
		1899-12-31 23:05:12	2.69	9.12	0.13	8.16	-0.29	0.05	29.37	0.29	45.2	-8.92	11.98	-2.75	0.25	0.0552544
		1899-12-31 23:05:12	2.7	9.93	0.1	8.16	-0.3	0.04	29.39	0.3	46.02	-9.74	11.2	-2.65	0.35	0.0552921
		1899-12-31 23:05:12	2.71	10.75	0.07	8.17	-0.31	0.03	29.4	0.31	46.83	-10.55	10.41	-2.55	0.45	0.0280016
		1899-12-31 23:05:12	2.71	11.57	0.04	8.17	-0.31	0.02	29.41	0.31	47.65	-11.37	9.61	-2.45	0.55	0.0276696
		1899-12-31 23:05:12	2.72	12.38	0.01	8.17	-0.32	0.02	29.42	0.32	48.47	-12.19	8.82	-2.35	0.65	0.027679
		1899-12-31 23:05:12	2.72	13.2	-0.02	8.17	-0.32	0.01	29.42	0.32	49.28	-13	8.03	-2.25	0.75	0
		1899-12-31 23:05:12	2.71	14.02	-0.05	8.17	-0.32	0	29.42	0.32	50.1	-13.82	7.23	-2.15	0.85	0
		1899-12-31 23:05:12	2.71	14.84	-0.09	8.17	-0.32	0	29.42	0.32	50.92	-14.64	6.43	-2.05	0.95	0
		1899-12-31 23:05:13	2.7	15.65	-0.12	8.17	-0.33	-0.01	29.42	0.33	51.73	-15.45	5.63	-1.95	1.05	0
		1899-12-31 23:05:13	2.68	16.47	-0.15	8.17	-0.33	-0.01	29.42	0.33	52.55	-16.27	4.83	-1.85	1.15	0
		1899-12-31 23:05:13	2.67	17.29	-0.18	8.17	-0.33	-0.02	29.42	0.33	53.37	-17.09	4.03	-1.75	1.25	0
		1899-12-31 23:05:13	2.65	18.1	-0.22	8.17	-0.33	-0.02	29.42	0.33	54.19	-17.91	3.23	-1.65	1.35	0
		1899-12-31 23:05:13	2.62	18.92	-0.25	8.17	-0.33	-0.02	29.41	0.33	55	-18.72	2.42	-1.55	1.45	-0.0280207
		1899-12-31 23:05:13	2.6	19.74	-0.28	8.16	-0.33	-0.02	29.41	0.33	55.82	-19.54	1.61	-1.45	1.55	0
		1899-12-31 23:05:13	2.57	20.55	-0.31	8.16	-0.33	-0.02	29.41	0.33	56.64	-20.36	0.81	-1.35	1.65	0
		1899-12-31 23:05:13	2.53	21.37	-0.35	8.16	-0.33	-0.02	29.41	0.33	57.45	-21.17	0	-1.25	1.75	0
3	1899-12-31 23:08:50	GlobalTime	X[m]	Y[m]	Vx[m/s]	Vy[m/s]	Ax[m/s2]	Ay[m/s2]	Speed[km/h]	Acceleration[m/s2]	Space[m]				3
		1899-12-31 23:08:39	2.56	-35.77	0.49	5.01	-0.07	0.03	18.12	0.07	0	36.1	48.17	-10.25	-7.25
		1899-12-31 23:08:39	2.61	-35.27	0.48	5.01	-0.09	0.03	18.12	0.09	0.5	35.6	47.55	-10.15	-7.15	0
		1899-12-31 23:08:39	2.66	-34.77	0.47	5.02	-0.11	0.04	18.13	0.12	1.01	35.09	46.94	-10.05	-7.05	0.0274222
		1899-12-31 23:08:40	2.7	-34.26	0.46	5.02	-0.13	0.05	18.14	0.14	1.51	34.59	46.34	-9.95	-6.95	0.0279861
		1899-12-31 23:08:40	2.75	-33.76	0.44	5.02	-0.15	0.05	18.16	0.16	2.01	34.09	45.74	-9.85	-6.85	0.0560185
		1899-12-31 23:08:40	2.79	-33.26	0.43	5.03	-0.17	0.06	18.17	0.18	2.52	33.58	45.14	-9.75	-6.75	0.0274828
		1899-12-31 23:08:40	2.83	-32.76	0.41	5.04	-0.19	0.07	18.19	0.2	3.02	33.08	44.54	-9.65	-6.65	0.0561111
		1899-12-31 23:08:40	2.87	-32.25	0.39	5.04	-0.2	0.07	18.21	0.22	3.53	32.57	43.96	-9.55	-6.55	0.0550714
		1899-12-31 23:08:40	2.91	-31.75	0.37	5.05	-0.22	0.08	18.23	0.23	4.04	32.06	43.37	-9.45	-6.45	0.0551319
		1899-12-31 23:08:40	2.95	-31.24	0.35	5.06	-0.23	0.08	18.26	0.25	4.54	31.56	42.79	-9.35	-6.35	0.0844676
		1899-12-31 23:08:40	2.98	-30.74	0.32	5.07	-0.25	0.09	18.28	0.26	5.05	31.05	42.21	-9.25	-6.25	0.0552832
		1899-12-31 23:08:40	3.01	-30.23	0.3	5.08	-0.26	0.09	18.31	0.28	5.56	30.54	41.64	-9.15	-6.15	0.0830383
		1899-12-31 23:08:40	3.04	-29.72	0.27	5.09	-0.27	0.1	18.34	0.29	6.07	30.03	41.07	-9.05	-6.05	0.0831745
		1899-12-31 23:08:41	3.07	-29.21	0.24	5.1	-0.28	0.1	18.37	0.3	6.58	29.52	40.5	-8.95	-5.95	0.0833106
		1899-12-31 23:08:41	3.09	-28.7	0.22	5.11	-0.29	0.1	18.4	0.31	7.09	29.01	39.94	-8.85	-5.85	0.0834468
		1899-12-31 23:08:41	3.11	-28.19	0.19	5.12	-0.3	0.1	18.43	0.31	7.6	28.5	39.38	-8.75	-5.75	0.083583
		1899-12-31 23:08:41	3.13	-27.68	0.16	5.13	-0.3	0.1	18.46	0.32	8.11	27.99	38.83	-8.65	-5.65	0.0837191
		1899-12-31 23:08:41	3.14	-27.17	0.13	5.14	-0.3	0.1	18.49	0.32	8.63	27.47	38.28	-8.55	-5.55	0.0822427
		1899-12-31 23:08:41	3.15	-26.65	0.1	5.15	-0.3	0.1	18.53	0.32	9.14	26.96	37.73	-8.45	-5.45	0.112019
		1899-12-31 23:08:41	3.16	-26.14	0.07	5.16	-0.3	0.1	18.56	0.32	9.65	26.45	37.18	-8.35	-5.35	0.084173
		1899-12-31 23:08:41	3.17	-25.62	0.04	5.17	-0.29	0.1	18.6	0.31	10.17	25.93	36.64	-8.25	-5.25	0.11028
		1899-12-31 23:08:41	3.17	-25.1	0.01	5.18	-0.28	0.1	18.64	0.3	10.69	25.41	36.1	-8.15	-5.15	0.110518
		1899-12-31 23:08:41	3.17	-24.58	-0.02	5.19	-0.27	0.11	18.68	0.29	11.21	24.89	35.56	-8.05	-5.05	0.110755
		1899-12-31 23:08:42	3.16	-24.07	-0.05	5.2	-0.26	0.11	18.71	0.28	11.73	24.37	35.03	-7.95	-4.95	0.083222
		1899-12-31 23:08:42	3.16	-23.54	-0.07	5.21	-0.25	0.11	18.75	0.27	12.25	23.85	34.49	-7.85	-4.85	0.11117
		1899-12-31 23:08:42	3.15	-23.02	-0.1	5.22	-0.23	0.11	18.8	0.26	12.77	23.33	33.96	-7.75	-4.75	0.139297
		1899-12-31 23:08:42	3.14	-22.5	-0.12	5.23	-0.22	0.11	18.84	0.24	13.29	22.81	33.43	-7.65	-4.65	0.111705
		1899-12-31 23:08:42	3.13	-21.98	-0.14	5.24	-0.2	0.11	18.88	0.23	13.81	22.29	32.9	-7.55	-4.55	0.111942
		1899-12-31 23:08:42	3.11	-21.45	-0.16	5.25	-0.18	0.11	18.92	0.21	14.34	21.76	32.37	-7.45	-4.45	0.110063
		1899-12-31 23:08:42	3.09	-20.93	-0.18	5.26	-0.16	0.11	18.96	0.19	14.87	21.23	31.85	-7.35	-4.35	0.110296
		1899-12-31 23:08:42	3.08	-20.4	-0.19	5.28	-0.14	0.11	19.01	0.18	15.39	20.71	31.32	-7.25	-4.25	0.140855
		1899-12-31 23:08:42	3.06	-19.87	-0.21	5.29	-0.11	0.11	19.05	0.16	15.92	20.18	30.79	-7.15	-4.15	0.11082
		1899-12-31 23:08:42	3.03	-19.34	-0.22	5.3	-0.09	0.1	19.09	0.14	16.45	19.65	30.27	-7.05	-4.05	0.111053
		1899-12-31 23:08:43	3.01	-18.81	-0.22	5.31	-0.07	0.09	19.12	0.12	16.98	19.12	29.74	-6.95	-3.95	0.0834425
		1899-12-31 23:08:43	2.99	-18.28	-0.23	5.32	-0.05	0.09	19.16	0.1	17.51	18.59	29.22	-6.85	-3.85	0.111461
		1899-12-31 23:08:43	2.97	-17.75	-0.23	5.32	-0.03	0.08	19.19	0.08	18.05	18.05	28.69	-6.75	-3.75	0.0821974
		1899-12-31 23:08:43	2.94	-17.22	-0.24	5.33	-0.01	0.06	19.21	0.06	18.58	17.52	28.17	-6.65	-3.65	0.055905
		1899-12-31 23:08:43	2.92	-16.68	-0.24	5.34	0.01	0.05	19.23	0.05	19.11	16.99	27.64	-6.55	-3.55	0.0559632
		1899-12-31 23:08:43	2.9	-16.15	-0.23	5.34	0.03	0.04	19.25	0.05	19.65	16.45	27.11	-6.45	-3.45	0.054984
		1899-12-31 23:08:43	2.87	-15.61	-0.23	5.35	0.05	0.02	19.26	0.06	20.18	15.92	26.58	-6.35	-3.35	0.0280326
		1899-12-31 23:08:43	2.85	-15.08	-0.22	5.35	0.07	0.01	19.27	0.07	20.72	15.38	26.05	-6.25	-3.25	0.0275277
		1899-12-31 23:08:43	2.83	-14.54	-0.22	5.35	0.09	-0.01	19.27	0.09	21.25	14.85	25.52	-6.15	-3.15	0
		1899-12-31 23:08:43	2.81	-14.01	-0.21	5.35	0.1	-0.02	19.26	0.1	21.79	14.31	24.99	-6.05	-3.05	-0.0275277
		1899-12-31 23:08:44	2.79	-13.48	-0.2	5.34	0.11	-0.03	19.25	0.12	22.32	13.78	24.46	-5.95	-2.95	-0.0280326
		1899-12-31 23:08:44	2.77	-12.94	-0.19	5.34	0.12	-0.05	19.24	0.13	22.86	13.24	23.93	-5.85	-2.85	-0.0274991
		1899-12-31 23:08:44	2.75	-12.41	-0.17	5.34	0.13	-0.06	19.22	0.14	23.39	12.71	23.39	-5.75	-2.75	-0.0559923
		1899-12-31 23:08:44	2.73	-11.87	-0.16	5.33	0.14	-0.07	19.2	0.15	23.93	12.17	22.86	-5.65	-2.65	-0.0548983
		1899-12-31 23:08:44	2.72	-11.34	-0.15	5.32	0.14	-0.07	19.17	0.16	24.46	11.64	22.32	-5.55	-2.55	-0.0837919
		1899-12-31 23:08:44	2.7	-10.81	-0.13	5.32	0.14	-0.08	19.14	0.17	24.99	11.11	21.79	-5.45	-2.45	-0.0836609
		1899-12-31 23:08:44	2.69	-10.28	-0.12	5.31	0.15	-0.08	19.11	0.17	25.52	10.58	21.25	-5.35	-2.35	-0.0835299
		1899-12-31 23:08:44	2.68	-9.75	-0.1	5.3	0.15	-0.08	19.08	0.17	26.05	10.05	20.72	-5.25	-2.25	-0.0833988
		1899-12-31 23:08:44	2.67	-9.22	-0.09	5.29	0.14	-0.08	19.05	0.17	26.58	9.52	20.18	-5.15	-2.15	-0.0832678
		1899-12-31 23:08:44	2.66	-8.69	-0.07	5.28	0.14	-0.08	19.02	0.16	27.11	8.99	19.65	-5.05	-2.05	-0.0831368
		1899-12-31 23:08:45	2.65	-8.16	-0.06	5.27	0.14	-0.07	18.99	0.15	27.64	8.46	19.11	-4.95	-1.95	-0.0830058
		1899-12-31 23:08:45	2.65	-7.63	-0.05	5.27	0.13	-0.06	18.96	0.15	28.17	7.93	18.58	-4.85	-1.85	-0.0828747
		1899-12-31 23:08:45	2.64	-7.11	-0.03	5.26	0.13	-0.05	18.94	0.13	28.69	7.41	18.05	-4.75	-1.75	-0.0562381
		1899-12-31 23:08:45	2.64	-6.58	-0.02	5.26	0.12	-0.03	18.93	0.12	29.22	6.88	17.51	-4.65	-1.65	-0.0275667
		1899-12-31 23:08:45	2.64	-6.06	-0.01	5.26	0.11	-0.01	18.92	0.11	29.74	6.36	16.98	-4.55	-1.55	-0.028082
		1899-12-31 23:08:45	2.64	-5.53	0	5.25	0.1	0.01	18.92	0.1	30.27	5.83	16.45	-4.45	-1.45	0
		1899-12-31 23:08:45	2.64	-5.01	0.01	5.26	0.09	0.03	18.92	0.1	30.79	5.31	15.92	-4.35	-1.35	0
		1899-12-31 23:08:45	2.64	-4.48	0.02	5.26	0.08	0.05	18.93	0.1	31.32	4.78	15.39	-4.25	-1.25	0.0275521
		1899-12-31 23:08:45	2.64	-3.95	0.03	5.26	0.07	0.07	18.95	0.1	31.85	4.25	14.87	-4.15	-1.15	0.0551479
		1899-12-31 23:08:45	2.65	-3.43	0.04	5.27	0.06	0.09	18.98	0.11	32.37	3.73	14.34	-4.05	-1.05	0.084424
		1899-12-31 23:08:46	2.65	-2.9	0.04	5.28	0.05	0.11	19.02	0.13	32.9	3.2	13.81	-3.95	-0.95	0.110645
		1899-12-31 23:08:46	2.66	-2.37	0.05	5.29	0.04	0.14	19.06	0.14	33.43	2.67	13.29	-3.85	-0.85	0.110878
		1899-12-31 23:08:46	2.66	-1.84	0.05	5.31	0.03	0.16	19.11	0.16	33.96	2.14	12.77	-3.75	-0.75	0.138925
		1899-12-31 23:08:46	2.67	-1.31	0.05	5.33	0.02	0.18	19.17	0.18	34.49	1.61	12.25	-3.65	-0.65	0.167191
		1899-12-31 23:08:46	2.67	-0.77	0.06	5.34	0.02	0.2	19.24	0.2	35.03	1.07	11.73	-3.55	-0.55	0.192094
		1899-12-31 23:08:46	2.68	-0.24	0.06	5.37	0.01	0.22	19.32	0.22	35.56	0.54	11.21	-3.45	-0.45	0.224552
		1899-12-31 23:08:46	2.68	0.3	0.06	5.39	0	0.24	19.4	0.24	36.1	0	10.69	-3.35	-0.35	0.221308
		1899-12-31 23:08:46	2.69	0.84	0.06	5.41	-0.01	0.26	19.49	0.27	36.64	-0.54	10.17	-3.25	-0.25	0.250064
		1899-12-31 23:08:46	2.69	1.38	0.06	5.44	-0.02	0.28	19.59	0.28	37.18	-1.08	9.65	-3.15	-0.15	0.279207
		1899-12-31 23:08:46	2.7	1.93	0.05	5.47	-0.03	0.3	19.69	0.3	37.73	-1.63	9.14	-3.05	-0.05	0.275533
		1899-12-31 23:08:47	2.7	2.48	0.05	5.5	-0.03	0.32	19.8	0.32	38.28	-2.18	8.63	-2.95	0.05	0.304707					19.8	-2.18
		1899-12-31 23:08:47	2.71	3.03	0.05	5.53	-0.04	0.33	19.92	0.34	38.83	-2.73	8.11	-2.85	0.15	0.334343
		1899-12-31 23:08:47	2.71	3.58	0.04	5.57	-0.05	0.35	20.04	0.35	39.38	-3.28	7.6	-2.75	0.25	0.336364
		1899-12-31 23:08:47	2.72	4.14	0.04	5.6	-0.05	0.36	20.17	0.36	39.94	-3.84	7.09	-2.65	0.35	0.360126
		1899-12-31 23:08:47	2.72	4.7	0.03	5.64	-0.06	0.37	20.3	0.38	40.5	-4.4	6.58	-2.55	0.45	0.362455
		1899-12-31 23:08:47	2.72	5.27	0.03	5.68	-0.07	0.38	20.44	0.39	41.07	-4.97	6.07	-2.45	0.55	0.386046
		1899-12-31 23:08:47	2.73	5.84	0.02	5.71	-0.07	0.39	20.57	0.39	41.64	-5.54	5.56	-2.35	0.65	0.360847
		1899-12-31 23:08:47	2.73	6.41	0.01	5.75	-0.08	0.39	20.71	0.4	42.21	-6.11	5.05	-2.25	0.75	0.391163
		1899-12-31 23:08:47	2.73	6.99	0	5.79	-0.08	0.4	20.86	0.41	42.79	-6.69	4.54	-2.15	0.85	0.414771
		1899-12-31 23:08:47	2.73	7.57	0	5.83	-0.09	0.4	21	0.41	43.37	-7.27	4.04	-2.05	0.95	0.38982
		1899-12-31 23:08:48	2.73	8.16	-0.01	5.87	-0.09	0.4	21.14	0.41	43.96	-7.86	3.53	-1.95	1.05	0.385776
		1899-12-31 23:08:48	2.73	8.74	-0.02	5.91	-0.09	0.4	21.29	0.41	44.54	-8.44	3.02	-1.85	1.15	0.423352
		1899-12-31 23:08:48	2.72	9.34	-0.03	5.95	-0.1	0.41	21.43	0.42	45.14	-9.04	2.52	-1.75	1.25	0.384568
		1899-12-31 23:08:48	2.72	9.94	-0.04	5.99	-0.1	0.41	21.58	0.42	45.74	-9.64	2.01	-1.65	1.35	0.414834
		1899-12-31 23:08:48	2.72	10.54	-0.05	6.04	-0.1	0.41	21.73	0.42	46.34	-10.24	1.51	-1.55	1.45	0.417728
		1899-12-31 23:08:48	2.71	11.14	-0.06	6.08	-0.1	0.41	21.87	0.42	46.94	-10.84	1.01	-1.45	1.55	0.39249
		1899-12-31 23:08:48	2.7	11.75	-0.07	6.12	-0.1	0.41	22.02	0.42	47.55	-11.45	0.5	-1.35	1.65	0.416382
		1899-12-31 23:08:48	2.7	12.37	-0.08	6.16	-0.1	0.41	22.17	0.42	48.17	-12.07	0	-1.25	1.75	0.412466
4	1899-12-31 23:23:16	GlobalTime	X[m]	Y[m]	Vx[m/s]	Vy[m/s]	Ax[m/s2]	Ay[m/s2]	Speed[km/h]	Acceleration[m/s2]	Space[m]				3
		1899-12-31 23:23:02	3.59	-35.85	0.1	3.23	-0.02	0	11.62	0.02	0	36.29	52.42	-13.99	-10.99
		1899-12-31 23:23:02	3.6	-35.52	0.1	3.23	-0.02	0	11.62	0.02	0.32	35.97	51.93	-13.89	-10.89	0
		1899-12-31 23:23:02	3.61	-35.2	0.1	3.23	-0.03	0	11.62	0.03	0.65	35.64	51.44	-13.79	-10.79	0
		1899-12-31 23:23:02	3.62	-34.88	0.1	3.23	-0.03	0	11.62	0.03	0.97	35.32	50.96	-13.69	-10.69	0
		1899-12-31 23:23:02	3.63	-34.56	0.09	3.23	-0.04	0	11.62	0.04	1.29	35	50.48	-13.59	-10.59	0
		1899-12-31 23:23:02	3.64	-34.23	0.09	3.23	-0.04	0	11.62	0.04	1.61	34.68	50.02	-13.49	-10.49	0
		1899-12-31 23:23:02	3.64	-33.91	0.09	3.23	-0.05	0	11.62	0.05	1.94	34.35	49.56	-13.39	-10.39	0
		1899-12-31 23:23:02	3.65	-33.59	0.08	3.23	-0.06	0	11.62	0.06	2.26	34.03	49.11	-13.29	-10.29	0
		1899-12-31 23:23:02	3.66	-33.26	0.07	3.23	-0.06	0.01	11.62	0.06	2.58	33.71	48.67	-13.19	-10.19	0
		1899-12-31 23:23:02	3.67	-32.94	0.07	3.23	-0.07	0.01	11.63	0.07	2.91	33.38	48.24	-13.09	-10.09	0.0271815
		1899-12-31 23:23:03	3.67	-32.62	0.06	3.23	-0.08	0.01	11.63	0.08	3.23	33.06	47.81	-12.99	-9.99	0
		1899-12-31 23:23:03	3.68	-32.3	0.05	3.23	-0.08	0.02	11.63	0.08	3.55	32.74	47.39	-12.89	-9.89	0
		1899-12-31 23:23:03	3.69	-31.97	0.04	3.23	-0.09	0.02	11.64	0.09	3.87	32.42	46.98	-12.79	-9.79	0.0280551
		1899-12-31 23:23:03	3.69	-31.65	0.04	3.24	-0.09	0.03	11.65	0.1	4.2	32.09	46.58	-12.69	-9.69	0.0272283
		1899-12-31 23:23:03	3.69	-31.32	0.03	3.24	-0.1	0.03	11.66	0.11	4.52	31.77	46.18	-12.59	-9.59	0.0281033
		1899-12-31 23:23:03	3.69	-31	0.02	3.24	-0.1	0.04	11.67	0.11	4.85	31.44	45.8	-12.49	-9.49	0.0272751
		1899-12-31 23:23:03	3.7	-30.68	0.01	3.25	-0.11	0.05	11.69	0.12	5.17	31.12	45.41	-12.39	-9.39	0.0563272
		1899-12-31 23:23:03	3.7	-30.35	-0.01	3.25	-0.11	0.05	11.71	0.12	5.5	30.79	45.04	-12.29	-9.29	0.0547138
		1899-12-31 23:23:03	3.69	-30.03	-0.02	3.26	-0.11	0.05	11.72	0.13	5.82	30.47	44.67	-12.19	-9.19	0.028248
		1899-12-31 23:23:03	3.69	-29.7	-0.03	3.26	-0.12	0.06	11.74	0.13	6.15	30.14	44.3	-12.09	-9.09	0.0548541
		1899-12-31 23:23:04	3.69	-29.37	-0.04	3.27	-0.12	0.06	11.77	0.13	6.47	29.82	43.94	-11.99	-8.99	0.0850333
		1899-12-31 23:23:04	3.68	-29.05	-0.05	3.27	-0.12	0.06	11.79	0.13	6.8	29.49	43.58	-11.89	-8.89	0.0550879
		1899-12-31 23:23:04	3.68	-28.72	-0.06	3.28	-0.11	0.06	11.81	0.13	7.13	29.16	43.22	-11.79	-8.79	0.0551814
		1899-12-31 23:23:04	3.67	-28.39	-0.07	3.29	-0.11	0.07	11.84	0.13	7.46	28.83	42.87	-11.69	-8.69	0.0829475
		1899-12-31 23:23:04	3.66	-28.06	-0.09	3.29	-0.11	0.07	11.86	0.13	7.79	28.5	42.52	-11.59	-8.59	0.0554153
		1899-12-31 23:23:04	3.65	-27.73	-0.1	3.3	-0.1	0.07	11.89	0.12	8.12	28.17	42.17	-11.49	-8.49	0.0832983
		1899-12-31 23:23:04	3.64	-27.4	-0.11	3.31	-0.09	0.07	11.91	0.12	8.45	27.84	41.82	-11.39	-8.39	0.0556491
		1899-12-31 23:23:04	3.63	-27.07	-0.12	3.31	-0.08	0.07	11.94	0.11	8.78	27.51	41.48	-11.29	-8.29	0.083649
		1899-12-31 23:23:04	3.62	-26.74	-0.12	3.32	-0.07	0.07	11.97	0.1	9.11	27.18	41.13	-11.19	-8.19	0.0838594
		1899-12-31 23:23:04	3.61	-26.41	-0.13	3.33	-0.06	0.07	11.99	0.1	9.44	26.85	40.78	-11.09	-8.09	0.0560232
		1899-12-31 23:23:05	3.59	-26.07	-0.14	3.34	-0.05	0.08	12.02	0.09	9.78	26.51	40.44	-10.99	-7.99	0.0817334
		1899-12-31 23:23:05	3.58	-25.74	-0.14	3.34	-0.04	0.08	12.05	0.08	10.11	26.18	40.09	-10.89	-7.89	0.0844206
		1899-12-31 23:23:05	3.57	-25.4	-0.14	3.35	-0.02	0.08	12.08	0.08	10.45	25.84	39.75	-10.79	-7.79	0.0821419
		1899-12-31 23:23:05	3.55	-25.07	-0.15	3.36	-0.01	0.08	12.11	0.08	10.78	25.51	39.4	-10.69	-7.69	0.0848415
		1899-12-31 23:23:05	3.54	-24.73	-0.15	3.37	0.01	0.08	12.13	0.08	11.12	25.17	39.06	-10.59	-7.59	0.0550109
		1899-12-31 23:23:05	3.52	-24.39	-0.14	3.37	0.03	0.08	12.16	0.08	11.46	24.83	38.71	-10.49	-7.49	0.0826865
		1899-12-31 23:23:05	3.51	-24.06	-0.14	3.38	0.04	0.08	12.19	0.09	11.79	24.5	38.37	-10.39	-7.39	0.0854026
		1899-12-31 23:23:05	3.5	-23.72	-0.14	3.39	0.06	0.07	12.21	0.09	12.13	24.16	38.02	-10.29	-7.29	0.055374
		1899-12-31 23:23:05	3.48	-23.38	-0.13	3.4	0.07	0.07	12.24	0.1	12.47	23.82	37.68	-10.19	-7.19	0.0832312
		1899-12-31 23:23:05	3.47	-23.04	-0.12	3.4	0.08	0.07	12.26	0.11	12.81	23.48	37.33	-10.09	-7.09	0.0556009
		1899-12-31 23:23:06	3.46	-22.7	-0.11	3.41	0.1	0.06	12.28	0.11	13.15	23.14	36.99	-9.99	-6.99	0.0556917
		1899-12-31 23:23:06	3.45	-22.36	-0.1	3.42	0.11	0.06	12.3	0.12	13.49	22.8	36.64	-9.89	-6.89	0.0557825
		1899-12-31 23:23:06	3.44	-22.01	-0.09	3.42	0.12	0.05	12.32	0.13	13.84	22.45	36.29	-9.79	-6.79	0.0542769
		1899-12-31 23:23:06	3.43	-21.67	-0.08	3.43	0.12	0.04	12.34	0.13	14.18	22.11	35.95	-9.69	-6.69	0.0559641
		1899-12-31 23:23:06	3.42	-21.33	-0.07	3.43	0.13	0.04	12.35	0.14	14.52	21.77	35.6	-9.59	-6.59	0.0280161
		1899-12-31 23:23:06	3.41	-20.99	-0.06	3.43	0.14	0.03	12.36	0.14	14.87	21.42	35.26	-9.49	-6.49	0.0272377
		1899-12-31 23:23:06	3.41	-20.64	-0.04	3.44	0.14	0.02	12.37	0.14	15.21	21.08	34.91	-9.39	-6.39	0.0280615
		1899-12-31 23:23:06	3.41	-20.3	-0.03	3.44	0.14	0.01	12.38	0.14	15.55	20.74	34.57	-9.29	-6.29	0.0280842
		1899-12-31 23:23:06	3.4	-19.96	-0.01	3.44	0.14	0.01	12.38	0.14	15.9	20.39	34.22	-9.19	-6.19	0
		1899-12-31 23:23:06	3.4	-19.61	0	3.44	0.14	0	12.38	0.14	16.24	20.05	33.87	-9.09	-6.09	0
		1899-12-31 23:23:07	3.4	-19.27	0.01	3.44	0.13	-0.01	12.38	0.13	16.58	19.71	33.53	-8.99	-5.99	0
		1899-12-31 23:23:07	3.41	-18.92	0.03	3.44	0.13	-0.01	12.38	0.13	16.93	19.36	33.18	-8.89	-5.89	0
		1899-12-31 23:23:07	3.41	-18.58	0.04	3.44	0.12	-0.02	12.38	0.12	17.27	19.02	32.84	-8.79	-5.79	0
		1899-12-31 23:23:07	3.41	-18.24	0.05	3.44	0.11	-0.02	12.37	0.11	17.62	18.67	32.49	-8.69	-5.69	-0.0272817
		1899-12-31 23:23:07	3.42	-17.89	0.06	3.43	0.1	-0.03	12.36	0.1	17.96	18.33	32.15	-8.59	-5.59	-0.0280615
		1899-12-31 23:23:07	3.43	-17.55	0.07	3.43	0.08	-0.03	12.35	0.09	18.3	17.99	31.8	-8.49	-5.49	-0.0280388
		1899-12-31 23:23:07	3.43	-17.21	0.08	3.43	0.07	-0.03	12.34	0.08	18.65	17.64	31.46	-8.39	-5.39	-0.0272156
		1899-12-31 23:23:07	3.44	-16.86	0.09	3.42	0.06	-0.04	12.33	0.07	18.99	17.3	31.11	-8.29	-5.29	-0.0279934
		1899-12-31 23:23:07	3.45	-16.52	0.09	3.42	0.04	-0.04	12.32	0.06	19.33	16.96	30.77	-8.19	-5.19	-0.0279707
		1899-12-31 23:23:07	3.46	-16.18	0.09	3.42	0.03	-0.04	12.3	0.05	19.67	16.62	30.43	-8.09	-5.09	-0.0558733
		1899-12-31 23:23:08	3.47	-15.84	0.1	3.41	0.01	-0.04	12.29	0.05	20.01	16.28	30.09	-7.99	-4.99	-0.0279026
		1899-12-31 23:23:08	3.48	-15.5	0.1	3.41	0	-0.05	12.27	0.05	20.36	15.93	29.75	-7.89	-4.89	-0.0541446
		1899-12-31 23:23:08	3.49	-15.16	0.1	3.4	-0.01	-0.05	12.25	0.05	20.7	15.59	29.41	-7.79	-4.79	-0.0556463
		1899-12-31 23:23:08	3.5	-14.82	0.1	3.4	-0.03	-0.05	12.24	0.06	21.04	15.25	29.08	-7.69	-4.69	-0.0277891
		1899-12-31 23:23:08	3.51	-14.48	0.09	3.39	-0.04	-0.05	12.22	0.07	21.38	14.91	28.74	-7.59	-4.59	-0.0555102
		1899-12-31 23:23:08	3.52	-14.14	0.09	3.39	-0.05	-0.05	12.2	0.08	21.71	14.58	28.41	-7.49	-4.49	-0.0570988
		1899-12-31 23:23:08	3.52	-13.8	0.08	3.38	-0.06	-0.06	12.18	0.09	22.05	14.24	28.07	-7.39	-4.39	-0.0553286
		1899-12-31 23:23:08	3.53	-13.46	0.08	3.38	-0.08	-0.06	12.16	0.09	22.39	13.9	27.74	-7.29	-4.29	-0.0552378
		1899-12-31 23:23:08	3.54	-13.12	0.07	3.37	-0.09	-0.06	12.14	0.1	22.73	13.56	27.4	-7.19	-4.19	-0.0551471
		1899-12-31 23:23:08	3.55	-12.79	0.06	3.36	-0.09	-0.06	12.11	0.11	23.07	13.22	27.07	-7.09	-4.09	-0.0825504
		1899-12-31 23:23:09	3.55	-12.45	0.05	3.36	-0.1	-0.06	12.09	0.12	23.4	12.89	26.74	-6.99	-3.99	-0.0565844
		1899-12-31 23:23:09	3.56	-12.12	0.04	3.35	-0.11	-0.06	12.07	0.12	23.74	12.55	26.41	-6.89	-3.89	-0.0548293
		1899-12-31 23:23:09	3.56	-11.78	0.03	3.35	-0.12	-0.05	12.05	0.13	24.07	12.22	26.07	-6.79	-3.79	-0.0563973
		1899-12-31 23:23:09	3.56	-11.45	0.02	3.34	-0.12	-0.05	12.03	0.13	24.41	11.88	25.74	-6.69	-3.69	-0.0546478
		1899-12-31 23:23:09	3.56	-11.11	0	3.34	-0.13	-0.04	12.01	0.13	24.74	11.55	25.41	-6.59	-3.59	-0.0562103
		1899-12-31 23:23:09	3.56	-10.78	-0.01	3.33	-0.13	-0.04	12	0.13	25.07	11.22	25.07	-6.49	-3.49	-0.0280701
		1899-12-31 23:23:09	3.56	-10.45	-0.02	3.33	-0.13	-0.03	11.98	0.13	25.41	10.88	24.74	-6.39	-3.39	-0.0544208
		1899-12-31 23:23:09	3.56	-10.11	-0.04	3.33	-0.13	-0.02	11.98	0.13	25.74	10.55	24.41	-6.29	-3.29	0
		1899-12-31 23:23:09	3.55	-9.78	-0.05	3.32	-0.13	-0.01	11.97	0.13	26.07	10.22	24.07	-6.19	-3.19	-0.0279999
		1899-12-31 23:23:09	3.55	-9.45	-0.06	3.32	-0.13	0	11.97	0.13	26.41	9.88	23.74	-6.09	-3.09	0
		1899-12-31 23:23:10	3.54	-9.12	-0.07	3.32	-0.12	0.02	11.97	0.12	26.74	9.55	23.4	-5.99	-2.99	0
		1899-12-31 23:23:10	3.53	-8.78	-0.09	3.33	-0.12	0.03	11.98	0.12	27.07	9.22	23.07	-5.89	-2.89	0.0279999
		1899-12-31 23:23:10	3.52	-8.45	-0.1	3.33	-0.11	0.04	11.99	0.12	27.4	8.89	22.73	-5.79	-2.79	0.0280233
		1899-12-31 23:23:10	3.51	-8.12	-0.11	3.33	-0.1	0.05	12.01	0.12	27.74	8.55	22.39	-5.69	-2.69	0.0544662
		1899-12-31 23:23:10	3.5	-7.78	-0.12	3.34	-0.09	0.07	12.03	0.11	28.07	8.22	22.05	-5.59	-2.59	0.0562103
		1899-12-31 23:23:10	3.49	-7.45	-0.13	3.35	-0.08	0.08	12.06	0.11	28.41	7.88	21.71	-5.49	-2.49	0.0820057
		1899-12-31 23:23:10	3.48	-7.11	-0.13	3.36	-0.07	0.09	12.09	0.11	28.74	7.55	21.38	-5.39	-2.39	0.0847012
		1899-12-31 23:23:10	3.46	-6.78	-0.14	3.36	-0.06	0.09	12.12	0.11	29.08	7.21	21.04	-5.29	-2.29	0.0824142
		1899-12-31 23:23:10	3.45	-6.44	-0.15	3.37	-0.05	0.1	12.16	0.11	29.41	6.88	20.7	-5.19	-2.19	0.113543
		1899-12-31 23:23:10	3.43	-6.1	-0.15	3.38	-0.03	0.1	12.19	0.11	29.75	6.54	20.36	-5.09	-2.09	0.0828908
		1899-12-31 23:23:11	3.42	-5.77	-0.15	3.39	-0.02	0.1	12.23	0.1	30.09	6.2	20.01	-4.99	-1.99	0.110839
		1899-12-31 23:23:11	3.4	-5.43	-0.16	3.4	-0.01	0.1	12.27	0.1	30.43	5.86	19.67	-4.89	-1.89	0.111202
		1899-12-31 23:23:11	3.39	-5.08	-0.16	3.41	0.01	0.09	12.3	0.09	30.77	5.52	19.33	-4.79	-1.79	0.0836397
		1899-12-31 23:23:11	3.37	-4.74	-0.16	3.42	0.02	0.08	12.33	0.09	31.11	5.18	18.99	-4.69	-1.69	0.083844
		1899-12-31 23:23:11	3.36	-4.4	-0.15	3.43	0.03	0.08	12.36	0.08	31.46	4.83	18.65	-4.59	-1.59	0.0816468
		1899-12-31 23:23:11	3.34	-4.06	-0.15	3.44	0.04	0.06	12.39	0.08	31.8	4.49	18.3	-4.49	-1.49	0.0842525
		1899-12-31 23:23:11	3.33	-3.71	-0.15	3.44	0.05	0.05	12.41	0.07	32.15	4.14	17.96	-4.39	-1.39	0.0546737
		1899-12-31 23:23:11	3.31	-3.37	-0.14	3.45	0.06	0.04	12.42	0.07	32.49	3.8	17.62	-4.29	-1.29	0.0281749
		1899-12-31 23:23:11	3.3	-3.02	-0.13	3.45	0.06	0.03	12.44	0.07	32.84	3.45	17.27	-4.19	-1.19	0.054806
		1899-12-31 23:23:11	3.29	-2.68	-0.13	3.46	0.06	0.02	12.45	0.07	33.18	3.11	16.93	-4.09	-1.09	0.028243
		1899-12-31 23:23:12	3.27	-2.33	-0.12	3.46	0.06	0.01	12.45	0.07	33.53	2.76	16.58	-3.99	-0.99	0
		1899-12-31 23:23:12	3.26	-1.99	-0.12	3.46	0.06	0.01	12.46	0.06	33.87	2.42	16.24	-3.89	-0.89	0.0282657
		1899-12-31 23:23:12	3.25	-1.64	-0.11	3.46	0.06	0	12.46	0.06	34.22	2.07	15.9	-3.79	-0.79	0
		1899-12-31 23:23:12	3.24	-1.29	-0.1	3.46	0.06	-0.01	12.46	0.06	34.57	1.72	15.55	-3.69	-0.69	0
		1899-12-31 23:23:12	3.23	-0.95	-0.1	3.46	0.05	-0.01	12.45	0.05	34.91	1.38	15.21	-3.59	-0.59	-0.0282657
		1899-12-31 23:23:12	3.22	-0.6	-0.09	3.46	0.05	-0.01	12.45	0.05	35.26	1.03	14.87	-3.49	-0.49	0
		1899-12-31 23:23:12	3.21	-0.26	-0.09	3.46	0.04	-0.01	12.44	0.04	35.6	0.69	14.52	-3.39	-0.39	-0.028243
		1899-12-31 23:23:12	3.2	0.09	-0.08	3.45	0.03	-0.01	12.44	0.03	35.95	0.34	14.18	-3.29	-0.29	0
		1899-12-31 23:23:12	3.19	0.43	-0.08	3.45	0.02	-0.01	12.44	0.02	36.29	0	13.84	-3.19	-0.19	0
		1899-12-31 23:23:12	3.19	0.78	-0.08	3.45	0.01	-0.01	12.43	0.02	36.64	-0.35	13.49	-3.09	-0.09	-0.027414
		1899-12-31 23:23:13	3.18	1.12	-0.08	3.45	0	-0.01	12.43	0.01	36.99	-0.7	13.15	-2.99	0.01	0					12.43	-0.7
		1899-12-31 23:23:13	3.17	1.47	-0.08	3.45	0	-0.01	12.43	0.01	37.33	-1.04	12.81	-2.89	0.11	0
		1899-12-31 23:23:13	3.16	1.81	-0.08	3.45	-0.01	0	12.42	0.01	37.68	-1.39	12.47	-2.79	0.21	-0.027392
		1899-12-31 23:23:13	3.15	2.16	-0.08	3.45	-0.02	0	12.42	0.02	38.02	-1.73	12.13	-2.69	0.31	0
		1899-12-31 23:23:13	3.15	2.5	-0.08	3.45	-0.03	0	12.42	0.03	38.37	-2.08	11.79	-2.59	0.41	0
		1899-12-31 23:23:13	3.14	2.85	-0.09	3.45	-0.03	0	12.42	0.03	38.71	-2.42	11.46	-2.49	0.51	0
		1899-12-31 23:23:13	3.13	3.19	-0.09	3.45	-0.04	0	12.43	0.04	39.06	-2.77	11.12	-2.39	0.61	0.027392
		1899-12-31 23:23:13	3.12	3.54	-0.09	3.45	-0.04	0.01	12.43	0.04	39.4	-3.11	10.78	-2.29	0.71	0
		1899-12-31 23:23:13	3.11	3.88	-0.1	3.45	-0.04	0.01	12.43	0.05	39.75	-3.46	10.45	-2.19	0.81	0
		1899-12-31 23:23:13	3.1	4.23	-0.1	3.45	-0.05	0.02	12.44	0.05	40.09	-3.8	10.11	-2.09	0.91	0.0282203
		1899-12-31 23:23:14	3.09	4.58	-0.11	3.45	-0.05	0.02	12.44	0.05	40.44	-4.15	9.78	-1.99	1.01	0
		1899-12-31 23:23:14	3.08	4.92	-0.11	3.46	-0.04	0.03	12.45	0.06	40.78	-4.49	9.44	-1.89	1.11	0.028243
		1899-12-31 23:23:14	3.07	5.27	-0.12	3.46	-0.04	0.05	12.47	0.06	41.13	-4.84	9.11	-1.79	1.21	0.0549383
		1899-12-31 23:23:14	3.05	5.61	-0.12	3.47	-0.04	0.07	12.49	0.08	41.48	-5.19	8.78	-1.69	1.31	0.0550265
		1899-12-31 23:23:14	3.04	5.96	-0.12	3.47	-0.03	0.09	12.52	0.1	41.82	-5.53	8.45	-1.59	1.41	0.0851375
		1899-12-31 23:23:14	3.03	6.31	-0.13	3.48	-0.03	0.12	12.55	0.13	42.17	-5.88	8.12	-1.49	1.51	0.0829034
		1899-12-31 23:23:14	3.02	6.66	-0.13	3.5	-0.02	0.16	12.6	0.16	42.52	-6.23	7.79	-1.39	1.61	0.138613
		1899-12-31 23:23:14	3	7.01	-0.13	3.52	-0.02	0.21	12.67	0.21	42.87	-6.58	7.46	-1.29	1.71	0.194985
		1899-12-31 23:23:14	2.99	7.36	-0.13	3.54	-0.01	0.26	12.75	0.26	43.22	-6.93	7.13	-1.19	1.81	0.224162
		1899-12-31 23:23:14	2.98	7.72	-0.13	3.57	0	0.31	12.85	0.31	43.58	-7.29	6.8	-1.09	1.91	0.274348
		1899-12-31 23:23:15	2.96	8.07	-0.13	3.6	0	0.37	12.96	0.37	43.94	-7.65	6.47	-0.99	2.01	0.304259
		1899-12-31 23:23:15	2.95	8.44	-0.13	3.64	0.01	0.43	13.1	0.43	44.3	-8.01	6.15	-0.89	2.11	0.390989
		1899-12-31 23:23:15	2.94	8.8	-0.13	3.68	0.01	0.49	13.26	0.49	44.67	-8.38	5.82	-0.79	2.21	0.439773
		1899-12-31 23:23:15	2.92	9.17	-0.13	3.73	0.02	0.54	13.45	0.54	45.04	-8.75	5.5	-0.69	2.31	0.529165
		1899-12-31 23:23:15	2.91	9.55	-0.13	3.79	0.02	0.6	13.65	0.6	45.41	-9.12	5.17	-0.59	2.41	0.565148
		1899-12-31 23:23:15	2.9	9.93	-0.13	3.85	0.02	0.65	13.87	0.65	45.8	-9.51	4.85	-0.49	2.51	0.598924
		1899-12-31 23:23:15	2.89	10.32	-0.12	3.92	0.03	0.69	14.11	0.69	46.18	-9.89	4.52	-0.39	2.61	0.681774
		1899-12-31 23:23:15	2.87	10.71	-0.12	3.99	0.03	0.73	14.36	0.73	46.58	-10.29	4.2	-0.29	2.71	0.686487
		1899-12-31 23:23:15	2.86	11.12	-0.12	4.06	0.03	0.76	14.63	0.76	46.98	-10.69	3.87	-0.19	2.81	0.754948
		1899-12-31 23:23:15	2.85	11.53	-0.12	4.14	0.03	0.78	14.91	0.78	47.39	-11.1	3.55	-0.09	2.91	0.778305
		1899-12-31 23:23:16	2.84	11.94	-0.11	4.22	0.04	0.79	15.19	0.79	47.81	-11.52	3.23	0.01	3.01	0.774177							15.19	-11.52
		1899-12-31 23:23:16	2.83	12.37	-0.11	4.3	0.04	0.79	15.47	0.79	48.24	-11.95	2.91	0.11	3.11	0.770241
		1899-12-31 23:23:16	2.82	12.8	-0.1	4.37	0.04	0.79	15.75	0.79	48.67	-12.38	2.58	0.21	3.21	0.78431
		1899-12-31 23:23:16	2.81	13.24	-0.1	4.45	0.04	0.79	16.04	0.79	49.11	-12.82	2.26	0.31	3.31	0.808353
		1899-12-31 23:23:16	2.8	13.69	-0.1	4.53	0.04	0.78	16.32	0.78	49.56	-13.27	1.94	0.41	3.41	0.776818
		1899-12-31 23:23:16	2.79	14.15	-0.09	4.61	0.04	0.78	16.6	0.78	50.02	-13.73	1.61	0.51	3.51	0.773081
		1899-12-31 23:23:16	2.78	14.62	-0.09	4.69	0.04	0.78	16.88	0.78	50.48	-14.19	1.29	0.61	3.61	0.786232
		1899-12-31 23:23:16	2.77	15.09	-0.08	4.77	0.04	0.78	17.16	0.78	50.96	-14.67	0.97	0.71	3.71	0.766075
		1899-12-31 23:23:16	2.76	15.57	-0.08	4.84	0.04	0.78	17.44	0.78	51.44	-15.15	0.65	0.81	3.81	0.778678
		1899-12-31 23:23:16	2.75	16.06	-0.08	4.92	0.04	0.78	17.72	0.78	51.93	-15.64	0.32	0.91	3.91	0.775132
		1899-12-31 23:23:17	2.75	16.55	-0.07	5	0.04	0.78	18	0.78	52.42	-16.13	0	1.01	4.01	0.787478
5	1899-12-31 23:33:49	GlobalTime	X[m]	Y[m]	Vx[m/s]	Vy[m/s]	Ax[m/s2]	Ay[m/s2]	Speed[km/h]	Acceleration[m/s2]	Space[m]				3
		1899-12-31 23:33:43	1.93	-35.51	0.14	7.97	-0.03	0.08	28.71	0.08	0	35.84	50.01	-5.25	-2.25
		1899-12-31 23:33:43	1.94	-34.72	0.14	7.98	-0.04	0.1	28.74	0.11	0.8	35.04	49.19	-5.15	-2.15	0.0831163
		1899-12-31 23:33:43	1.95	-33.92	0.13	7.99	-0.05	0.12	28.78	0.13	1.6	34.24	48.37	-5.05	-2.05	0.110957
		1899-12-31 23:33:44	1.97	-33.12	0.13	8	-0.06	0.14	28.82	0.15	2.4	33.44	47.55	-4.95	-1.95	0.111111
		1899-12-31 23:33:44	1.98	-32.32	0.12	8.02	-0.07	0.16	28.87	0.18	3.2	32.64	46.73	-4.85	-1.85	0.139106
		1899-12-31 23:33:44	1.99	-31.51	0.11	8.04	-0.08	0.18	28.93	0.2	4	31.84	45.9	-4.75	-1.75	0.167245
		1899-12-31 23:33:44	2	-30.71	0.11	8.06	-0.09	0.2	29	0.22	4.81	31.03	45.07	-4.65	-1.65	0.193144
		1899-12-31 23:33:44	2.01	-29.9	0.1	8.08	-0.09	0.21	29.07	0.23	5.61	30.23	44.24	-4.55	-1.55	0.196031
		1899-12-31 23:33:44	2.02	-29.09	0.09	8.1	-0.1	0.23	29.15	0.25	6.42	29.42	43.41	-4.45	-1.45	0.221841
		1899-12-31 23:33:44	2.03	-28.28	0.08	8.12	-0.11	0.24	29.24	0.26	7.23	28.61	42.57	-4.35	-1.35	0.2503
		1899-12-31 23:33:44	2.04	-27.47	0.07	8.14	-0.11	0.25	29.32	0.27	8.04	27.8	41.74	-4.25	-1.25	0.223137
		1899-12-31 23:33:44	2.04	-26.65	0.05	8.17	-0.11	0.25	29.41	0.28	8.86	26.98	40.9	-4.15	-1.15	0.248687
		1899-12-31 23:33:44	2.05	-25.83	0.04	8.2	-0.12	0.26	29.5	0.28	9.68	26.16	40.06	-4.05	-1.05	0.24945
		1899-12-31 23:33:45	2.05	-25.01	0.03	8.22	-0.12	0.26	29.6	0.28	10.5	25.34	39.22	-3.95	-0.95	0.27806
		1899-12-31 23:33:45	2.05	-24.19	0.02	8.25	-0.11	0.26	29.69	0.28	11.32	24.52	38.38	-3.85	-0.85	0.251059
		1899-12-31 23:33:45	2.05	-23.36	0.01	8.27	-0.11	0.25	29.78	0.28	12.15	23.69	37.53	-3.75	-0.75	0.248787
		1899-12-31 23:33:45	2.05	-22.54	0	8.3	-0.11	0.25	29.87	0.27	12.98	22.86	36.69	-3.65	-0.65	0.24954
		1899-12-31 23:33:45	2.05	-21.7	-0.01	8.32	-0.1	0.24	29.96	0.26	13.81	22.03	35.84	-3.55	-0.55	0.250293
		1899-12-31 23:33:45	2.05	-20.87	-0.02	8.35	-0.09	0.23	30.05	0.25	14.64	21.2	34.99	-3.45	-0.45	0.251046
		1899-12-31 23:33:45	2.05	-20.04	-0.03	8.37	-0.09	0.22	30.13	0.23	15.48	20.36	34.15	-3.35	-0.35	0.22112
		1899-12-31 23:33:45	2.05	-19.2	-0.04	8.39	-0.08	0.2	30.21	0.22	16.32	19.52	33.3	-3.25	-0.25	0.221708
		1899-12-31 23:33:45	2.04	-18.36	-0.05	8.41	-0.07	0.19	30.28	0.2	17.16	18.68	32.45	-3.15	-0.15	0.194477
		1899-12-31 23:33:45	2.04	-17.52	-0.05	8.43	-0.06	0.17	30.34	0.18	18	17.84	31.6	-3.05	-0.05	0.167052
		1899-12-31 23:33:46	2.03	-16.67	-0.06	8.44	-0.05	0.15	30.4	0.16	18.84	17	30.75	-2.95	0.05	0.167383					30.4	17
		1899-12-31 23:33:46	2.02	-15.83	-0.06	8.46	-0.04	0.14	30.46	0.14	19.69	16.15	29.89	-2.85	0.15	0.165741
		1899-12-31 23:33:46	2.02	-14.98	-0.07	8.47	-0.03	0.12	30.5	0.12	20.53	15.31	29.04	-2.75	0.25	0.111993
		1899-12-31 23:33:46	2.01	-14.13	-0.07	8.48	-0.02	0.1	30.54	0.1	21.38	14.46	28.19	-2.65	0.35	0.110821
		1899-12-31 23:33:46	2	-13.28	-0.07	8.49	-0.01	0.09	30.58	0.09	22.23	13.61	27.34	-2.55	0.45	0.110966
		1899-12-31 23:33:46	2	-12.43	-0.07	8.5	0	0.07	30.61	0.07	23.08	12.76	26.49	-2.45	0.55	0.0833197
		1899-12-31 23:33:46	1.99	-11.58	-0.07	8.51	0.01	0.06	30.63	0.06	23.93	11.91	25.63	-2.35	0.65	0.0555919
		1899-12-31 23:33:46	1.98	-10.73	-0.07	8.51	0.02	0.04	30.65	0.05	24.78	11.06	24.78	-2.25	0.75	0.0556282
		1899-12-31 23:33:46	1.98	-9.88	-0.07	8.52	0.03	0.03	30.66	0.04	25.63	10.21	23.93	-2.15	0.85	0.0278277
		1899-12-31 23:33:46	1.97	-9.03	-0.06	8.52	0.03	0.02	30.67	0.04	26.49	9.35	23.08	-2.05	0.95	0.0275131
		1899-12-31 23:33:47	1.96	-8.18	-0.06	8.52	0.04	0	30.68	0.04	27.34	8.5	22.23	-1.95	1.05	0.0278459
		1899-12-31 23:33:47	1.96	-7.32	-0.06	8.52	0.05	-0.01	30.68	0.05	28.19	7.65	21.38	-1.85	1.15	0
		1899-12-31 23:33:47	1.95	-6.47	-0.05	8.52	0.05	-0.02	30.67	0.06	29.04	6.8	20.53	-1.75	1.25	-0.0278459
		1899-12-31 23:33:47	1.95	-5.62	-0.05	8.52	0.05	-0.03	30.66	0.06	29.89	5.95	19.69	-1.65	1.35	-0.0278368
		1899-12-31 23:33:47	1.94	-4.77	-0.04	8.51	0.06	-0.05	30.65	0.07	30.75	5.09	18.84	-1.55	1.45	-0.0275041
		1899-12-31 23:33:47	1.94	-3.92	-0.03	8.51	0.06	-0.06	30.63	0.08	31.6	4.24	18	-1.45	1.55	-0.0556282
		1899-12-31 23:33:47	1.94	-3.07	-0.03	8.5	0.06	-0.07	30.61	0.09	32.45	3.39	17.16	-1.35	1.65	-0.0555919
		1899-12-31 23:33:47	1.93	-2.22	-0.02	8.49	0.07	-0.08	30.58	0.1	33.3	2.54	16.32	-1.25	1.75	-0.0833197
		1899-12-31 23:33:47	1.93	-1.37	-0.02	8.49	0.07	-0.09	30.55	0.11	34.15	1.69	15.48	-1.15	1.85	-0.083238
		1899-12-31 23:33:47	1.93	-0.52	-0.01	8.48	0.07	-0.1	30.52	0.12	34.99	0.85	14.64	-1.05	1.95	-0.0841463
		1899-12-31 23:33:48	1.93	0.33	0	8.47	0.07	-0.11	30.48	0.13	35.84	0	13.81	-0.95	2.05	-0.110748
		1899-12-31 23:33:48	1.93	1.17	0.01	8.46	0.07	-0.12	30.44	0.14	36.69	-0.85	12.98	-0.85	2.15	-0.110603
		1899-12-31 23:33:48	1.93	2.02	0.01	8.44	0.07	-0.13	30.4	0.15	37.53	-1.69	12.15	-0.75	2.25	-0.111772
		1899-12-31 23:33:48	1.93	2.86	0.02	8.43	0.07	-0.14	30.35	0.15	38.38	-2.54	11.32	-0.65	2.35	-0.137868
		1899-12-31 23:33:48	1.93	3.7	0.03	8.42	0.07	-0.15	30.3	0.16	39.22	-3.38	10.5	-0.55	2.45	-0.139279
		1899-12-31 23:33:48	1.94	4.55	0.03	8.4	0.07	-0.15	30.24	0.17	40.06	-4.22	9.68	-0.45	2.55	-0.166832
		1899-12-31 23:33:48	1.94	5.38	0.04	8.39	0.07	-0.16	30.19	0.18	40.9	-5.06	8.86	-0.35	2.65	-0.138774
		1899-12-31 23:33:48	1.95	6.22	0.05	8.37	0.07	-0.17	30.13	0.18	41.74	-5.9	8.04	-0.25	2.75	-0.166226
		1899-12-31 23:33:48	1.95	7.06	0.05	8.35	0.07	-0.18	30.07	0.19	42.57	-6.73	7.23	-0.15	2.85	-0.167894
		1899-12-31 23:33:48	1.96	7.89	0.06	8.33	0.07	-0.18	30	0.2	43.41	-7.57	6.42	-0.05	2.95	-0.193126
		1899-12-31 23:33:49	1.96	8.73	0.07	8.32	0.07	-0.19	29.94	0.2	44.24	-8.4	5.61	0.05	3.05	-0.167169							29.94	-8.4
		1899-12-31 23:33:49	1.97	9.56	0.08	8.3	0.07	-0.19	29.87	0.21	45.07	-9.23	4.81	0.15	3.15	-0.194607
		1899-12-31 23:33:49	1.98	10.38	0.08	8.28	0.07	-0.2	29.8	0.21	45.9	-10.06	4	0.25	3.25	-0.194152
		1899-12-31 23:33:49	1.99	11.21	0.09	8.26	0.07	-0.2	29.73	0.21	46.73	-10.89	3.2	0.35	3.35	-0.193696
		1899-12-31 23:33:49	2	12.04	0.1	8.24	0.07	-0.2	29.66	0.21	47.55	-11.71	2.4	0.45	3.45	-0.195597
		1899-12-31 23:33:49	2.01	12.86	0.11	8.22	0.07	-0.2	29.59	0.21	48.37	-12.53	1.6	0.55	3.55	-0.195136
		1899-12-31 23:33:49	2.02	13.68	0.11	8.2	0.07	-0.2	29.52	0.21	49.19	-13.35	0.8	0.65	3.65	-0.194675
		1899-12-31 23:33:49	2.03	14.5	0.12	8.18	0.07	-0.2	29.44	0.21	50.01	-14.17	0	0.75	3.75	-0.221921
6	1899-12-31 23:37:24	GlobalTime	X[m]	Y[m]	Vx[m/s]	Vy[m/s]	Ax[m/s2]	Ay[m/s2]	Speed[km/h]	Acceleration[m/s2]	Space[m]				3
		1899-12-31 23:37:16	3.12	-36.09	-0.04	5.44	-0.02	0.05	19.57	0.05	0	36.92	48.83	-7.12	-4.12
		1899-12-31 23:37:16	3.11	-35.55	-0.04	5.44	-0.03	0.06	19.59	0.07	0.54	36.38	48.19	-7.02	-4.02	0.0559556
		1899-12-31 23:37:17	3.11	-35	-0.04	5.45	-0.04	0.07	19.62	0.08	1.09	35.83	47.55	-6.92	-3.92	0.0825126
		1899-12-31 23:37:17	3.1	-34.46	-0.05	5.46	-0.04	0.09	19.64	0.1	1.63	35.29	46.91	-6.82	-3.82	0.0560985
		1899-12-31 23:37:17	3.1	-33.91	-0.05	5.47	-0.05	0.1	19.68	0.11	2.18	34.74	46.28	-6.72	-3.72	0.110325
		1899-12-31 23:37:17	3.09	-33.36	-0.06	5.48	-0.06	0.11	19.71	0.12	2.73	34.19	45.64	-6.62	-3.62	0.0828914
		1899-12-31 23:37:17	3.09	-32.82	-0.06	5.49	-0.06	0.12	19.75	0.13	3.28	33.64	45.01	-6.52	-3.52	0.110718
		1899-12-31 23:37:17	3.08	-32.27	-0.07	5.5	-0.07	0.12	19.8	0.14	3.82	33.1	44.38	-6.42	-3.42	0.141282
		1899-12-31 23:37:17	3.07	-31.72	-0.08	5.51	-0.08	0.13	19.84	0.15	4.37	32.55	43.74	-6.32	-3.32	0.111223
		1899-12-31 23:37:17	3.07	-31.16	-0.08	5.52	-0.09	0.13	19.89	0.16	4.93	31.99	43.11	-6.22	-3.22	0.136857
		1899-12-31 23:37:17	3.06	-30.61	-0.09	5.54	-0.09	0.14	19.94	0.17	5.48	31.44	42.49	-6.12	-3.12	0.139696
		1899-12-31 23:37:17	3.05	-30.06	-0.1	5.55	-0.1	0.14	19.99	0.17	6.03	30.89	41.86	-6.02	-3.02	0.140046
		1899-12-31 23:37:18	3.04	-29.5	-0.11	5.57	-0.11	0.14	20.04	0.17	6.59	30.33	41.23	-5.92	-2.92	0.13789
		1899-12-31 23:37:18	3.02	-28.94	-0.12	5.58	-0.11	0.13	20.09	0.18	7.15	29.77	40.61	-5.82	-2.82	0.138234
		1899-12-31 23:37:18	3.01	-28.38	-0.14	5.59	-0.12	0.13	20.14	0.18	7.71	29.21	39.99	-5.72	-2.72	0.138579
		1899-12-31 23:37:18	3	-27.82	-0.15	5.61	-0.12	0.12	20.19	0.18	8.27	28.65	39.37	-5.62	-2.62	0.138923
		1899-12-31 23:37:18	2.98	-27.26	-0.16	5.62	-0.13	0.12	20.23	0.17	8.83	28.09	38.75	-5.52	-2.52	0.111387
		1899-12-31 23:37:18	2.96	-26.7	-0.17	5.63	-0.13	0.11	20.27	0.17	9.39	27.53	38.14	-5.42	-2.42	0.111607
		1899-12-31 23:37:18	2.95	-26.14	-0.19	5.64	-0.14	0.1	20.31	0.17	9.95	26.97	37.53	-5.32	-2.32	0.111828
		1899-12-31 23:37:18	2.93	-25.57	-0.2	5.65	-0.14	0.09	20.35	0.17	10.52	26.4	36.92	-5.22	-2.22	0.110082
		1899-12-31 23:37:18	2.91	-25.01	-0.22	5.66	-0.15	0.07	20.38	0.16	11.08	25.84	36.32	-5.12	-2.12	0.0841807
		1899-12-31 23:37:18	2.88	-24.44	-0.23	5.66	-0.15	0.06	20.41	0.16	11.65	25.27	35.71	-5.02	-2.02	0.0828257
		1899-12-31 23:37:19	2.86	-23.88	-0.25	5.67	-0.15	0.05	20.43	0.16	12.22	24.7	35.12	-4.92	-1.92	0.0552848
		1899-12-31 23:37:19	2.84	-23.31	-0.26	5.67	-0.15	0.03	20.45	0.15	12.79	24.13	34.52	-4.82	-1.82	0.055339
		1899-12-31 23:37:19	2.81	-22.74	-0.27	5.68	-0.15	0.02	20.46	0.15	13.35	23.57	33.93	-4.72	-1.72	0.0281842
		1899-12-31 23:37:19	2.78	-22.17	-0.29	5.68	-0.14	0.01	20.47	0.14	13.92	23	33.34	-4.62	-1.62	0.0277033
		1899-12-31 23:37:19	2.75	-21.61	-0.3	5.68	-0.14	0	20.47	0.14	14.49	22.43	32.75	-4.52	-1.52	0
		1899-12-31 23:37:19	2.72	-21.04	-0.32	5.68	-0.13	-0.01	20.47	0.13	15.06	21.86	32.16	-4.42	-1.42	0
		1899-12-31 23:37:19	2.69	-20.47	-0.33	5.68	-0.12	-0.02	20.47	0.12	15.63	21.29	31.58	-4.32	-1.32	0
		1899-12-31 23:37:19	2.65	-19.9	-0.34	5.67	-0.11	-0.03	20.46	0.11	16.2	20.72	31	-4.22	-1.22	-0.0277033
		1899-12-31 23:37:19	2.62	-19.34	-0.35	5.67	-0.09	-0.03	20.45	0.1	16.77	20.15	30.42	-4.12	-1.12	-0.0276898
		1899-12-31 23:37:19	2.58	-18.77	-0.36	5.67	-0.08	-0.03	20.44	0.09	17.33	19.59	29.84	-4.02	-1.02	-0.0281705
		1899-12-31 23:37:20	2.55	-18.2	-0.37	5.66	-0.06	-0.03	20.43	0.07	17.9	19.02	29.27	-3.92	-0.92	-0.0276627
		1899-12-31 23:37:20	2.51	-17.64	-0.37	5.66	-0.04	-0.03	20.42	0.05	18.47	18.45	28.69	-3.82	-0.82	-0.0276492
		1899-12-31 23:37:20	2.47	-17.07	-0.38	5.66	-0.03	-0.03	20.41	0.04	19.04	17.88	28.12	-3.72	-0.72	-0.0276356
		1899-12-31 23:37:20	2.43	-16.5	-0.38	5.65	-0.01	-0.02	20.4	0.02	19.6	17.32	27.55	-3.62	-0.62	-0.0281154
		1899-12-31 23:37:20	2.4	-15.94	-0.38	5.65	0.02	-0.02	20.39	0.02	20.17	16.75	26.98	-3.52	-0.52	-0.0276086
		1899-12-31 23:37:20	2.36	-15.37	-0.38	5.65	0.04	-0.01	20.39	0.04	20.74	16.18	26.41	-3.42	-0.42	0
		1899-12-31 23:37:20	2.32	-14.81	-0.37	5.65	0.06	0	20.39	0.06	21.3	15.62	25.84	-3.32	-0.32	0
		1899-12-31 23:37:20	2.28	-14.24	-0.37	5.65	0.08	0.01	20.39	0.08	21.87	15.05	25.27	-3.22	-0.22	0
		1899-12-31 23:37:20	2.25	-13.68	-0.36	5.65	0.1	0.02	20.39	0.1	22.43	14.49	24.7	-3.12	-0.12	0
		1899-12-31 23:37:20	2.21	-13.11	-0.35	5.66	0.12	0.03	20.4	0.13	23	13.92	24.13	-3.02	-0.02	0.0276086					20.4	13.92
		1899-12-31 23:37:21	2.18	-12.55	-0.33	5.66	0.14	0.04	20.41	0.15	23.57	13.35	23.57	-2.92	0.08	0.0276221
		1899-12-31 23:37:21	2.15	-11.98	-0.32	5.66	0.16	0.05	20.42	0.17	24.13	12.79	23	-2.82	0.18	0.0281291
		1899-12-31 23:37:21	2.12	-11.41	-0.3	5.67	0.18	0.06	20.44	0.19	24.7	12.22	22.43	-2.72	0.28	0.0553119
		1899-12-31 23:37:21	2.09	-10.85	-0.28	5.68	0.2	0.07	20.46	0.21	25.27	11.65	21.87	-2.62	0.38	0.055366
		1899-12-31 23:37:21	2.06	-10.28	-0.26	5.68	0.21	0.08	20.48	0.23	25.84	11.08	21.3	-2.52	0.48	0.0554202
		1899-12-31 23:37:21	2.03	-9.71	-0.24	5.69	0.22	0.09	20.51	0.24	26.41	10.51	20.74	-2.42	0.58	0.0832318
		1899-12-31 23:37:21	2.01	-9.14	-0.22	5.7	0.23	0.1	20.54	0.25	26.98	9.94	20.17	-2.32	0.68	0.0833536
		1899-12-31 23:37:21	1.99	-8.57	-0.19	5.71	0.24	0.11	20.57	0.27	27.55	9.37	19.6	-2.22	0.78	0.0834755
		1899-12-31 23:37:21	1.97	-8	-0.17	5.72	0.25	0.12	20.61	0.28	28.12	8.8	19.04	-2.12	0.88	0.11149
		1899-12-31 23:37:21	1.96	-7.43	-0.14	5.74	0.25	0.13	20.65	0.28	28.69	8.23	18.47	-2.02	0.98	0.111707
		1899-12-31 23:37:22	1.94	-6.85	-0.12	5.75	0.25	0.14	20.7	0.29	29.27	7.65	17.9	-1.92	1.08	0.137525
		1899-12-31 23:37:22	1.93	-6.28	-0.09	5.76	0.25	0.16	20.75	0.3	29.84	7.08	17.33	-1.82	1.18	0.140276
		1899-12-31 23:37:22	1.92	-5.7	-0.07	5.78	0.25	0.17	20.81	0.3	30.42	6.5	16.77	-1.72	1.28	0.165868
		1899-12-31 23:37:22	1.92	-5.12	-0.05	5.8	0.24	0.19	20.87	0.31	31	5.92	16.2	-1.62	1.38	0.166347
		1899-12-31 23:37:22	1.92	-4.54	-0.02	5.82	0.23	0.21	20.94	0.31	31.58	5.34	15.63	-1.52	1.48	0.194677
		1899-12-31 23:37:22	1.91	-3.96	0	5.84	0.22	0.23	21.02	0.32	32.16	4.76	15.06	-1.42	1.58	0.223287
		1899-12-31 23:37:22	1.92	-3.37	0.02	5.86	0.21	0.24	21.1	0.32	32.75	4.17	14.49	-1.32	1.68	0.220339
		1899-12-31 23:37:22	1.92	-2.78	0.04	5.89	0.2	0.26	21.19	0.33	33.34	3.58	13.92	-1.22	1.78	0.248882
		1899-12-31 23:37:22	1.92	-2.19	0.06	5.91	0.18	0.28	21.29	0.33	33.93	2.99	13.35	-1.12	1.88	0.277778
		1899-12-31 23:37:22	1.93	-1.6	0.08	5.94	0.17	0.29	21.39	0.33	34.52	2.4	12.79	-1.02	1.98	0.279086
		1899-12-31 23:37:23	1.94	-1	0.1	5.97	0.15	0.3	21.5	0.33	35.12	1.8	12.22	-0.92	2.08	0.303363
		1899-12-31 23:37:23	1.95	-0.41	0.11	6	0.13	0.3	21.61	0.33	35.71	1.21	11.65	-0.82	2.18	0.310087
		1899-12-31 23:37:23	1.96	0.2	0.12	6.03	0.12	0.3	21.72	0.33	36.32	0.6	11.08	-0.72	2.28	0.301451
		1899-12-31 23:37:23	1.98	0.8	0.14	6.06	0.1	0.3	21.83	0.32	36.92	0	10.52	-0.62	2.38	0.308031
		1899-12-31 23:37:23	1.99	1.41	0.15	6.09	0.09	0.29	21.94	0.31	37.53	-0.61	9.95	-0.52	2.48	0.304512
		1899-12-31 23:37:23	2.01	2.02	0.15	6.12	0.07	0.28	22.04	0.29	38.14	-1.22	9.39	-0.42	2.58	0.278157
		1899-12-31 23:37:23	2.02	2.63	0.16	6.15	0.06	0.27	22.14	0.27	38.75	-1.83	8.83	-0.32	2.68	0.279422
		1899-12-31 23:37:23	2.04	3.25	0.17	6.17	0.05	0.25	22.24	0.25	39.37	-2.45	8.27	-0.22	2.78	0.27616
		1899-12-31 23:37:23	2.05	3.87	0.17	6.2	0.04	0.23	22.32	0.23	39.99	-3.07	7.71	-0.12	2.88	0.221824
		1899-12-31 23:37:23	2.07	4.49	0.17	6.22	0.03	0.21	22.4	0.21	40.61	-3.69	7.15	-0.02	2.98	0.22262							22.4	-3.69
		1899-12-31 23:37:24	2.09	5.11	0.18	6.24	0.02	0.19	22.48	0.19	41.23	-4.31	6.59	0.08	3.08	0.223417
		1899-12-31 23:37:24	2.11	5.74	0.18	6.26	0.01	0.17	22.55	0.18	41.86	-4.94	6.03	0.18	3.18	0.19303
		1899-12-31 23:37:24	2.12	6.36	0.18	6.28	0.01	0.16	22.61	0.16	42.49	-5.57	5.48	0.28	3.28	0.165932
		1899-12-31 23:37:24	2.14	6.99	0.18	6.29	0.01	0.15	22.66	0.15	43.11	-6.19	4.93	0.38	3.38	0.140849
		1899-12-31 23:37:24	2.16	7.62	0.18	6.31	0	0.14	22.71	0.14	43.74	-6.82	4.37	0.48	3.48	0.13892
		1899-12-31 23:37:24	2.18	8.25	0.18	6.32	0	0.13	22.76	0.13	44.38	-7.46	3.82	0.58	3.58	0.13705
		1899-12-31 23:37:24	2.2	8.88	0.18	6.33	0	0.12	22.81	0.12	45.01	-8.09	3.28	0.68	3.68	0.139532
		1899-12-31 23:37:24	2.21	9.52	0.18	6.34	0	0.11	22.85	0.11	45.64	-8.72	2.73	0.78	3.78	0.111846
		1899-12-31 23:37:24	2.23	10.15	0.18	6.36	0	0.11	22.89	0.11	46.28	-9.36	2.18	0.88	3.88	0.110291
		1899-12-31 23:37:24	2.25	10.79	0.18	6.37	0	0.11	22.93	0.11	46.91	-9.99	1.63	0.98	3.98	0.112238
		1899-12-31 23:37:25	2.27	11.43	0.18	6.38	0	0.11	22.97	0.11	47.55	-10.63	1.09	1.08	4.08	0.110677
		1899-12-31 23:37:25	2.29	12.07	0.18	6.39	0	0.11	23.01	0.11	48.19	-11.27	0.54	1.18	4.18	0.11087
		1899-12-31 23:37:25	2.3	12.7	0.18	6.4	0	0.11	23.05	0.11	48.83	-11.91	0	1.28	4.28	0.111063
7	1899-12-31 23:58:59	GlobalTime	X[m]	Y[m]	Vx[m/s]	Vy[m/s]	Ax[m/s2]	Ay[m/s2]	Speed[km/h]	Acceleration[m/s2]	Space[m]				3
		1899-12-31 23:58:51	1.95	-35.86	0.05	7.73	0.05	-0.03	27.84	0.06	0	36.54	47.07	-7.36	-4.36
		1899-12-31 23:58:51	1.96	-35.09	0.05	7.73	0.06	-0.04	27.83	0.08	0.77	35.77	46.41	-7.26	-4.26	-0.027893
		1899-12-31 23:58:51	1.96	-34.31	0.06	7.73	0.08	-0.05	27.81	0.09	1.55	34.99	45.76	-7.16	-4.16	-0.0550412
		1899-12-31 23:58:51	1.97	-33.54	0.06	7.72	0.09	-0.06	27.79	0.11	2.32	34.22	45.1	-7.06	-4.06	-0.0557159
		1899-12-31 23:58:52	1.98	-32.77	0.07	7.71	0.1	-0.07	27.77	0.13	3.09	33.45	44.45	-6.96	-3.96	-0.0556758
		1899-12-31 23:58:52	1.98	-32	0.08	7.71	0.11	-0.08	27.74	0.14	3.86	32.68	43.79	-6.86	-3.86	-0.0834386
		1899-12-31 23:58:52	1.99	-31.23	0.1	7.7	0.12	-0.09	27.71	0.15	4.63	31.91	43.14	-6.76	-3.76	-0.0833484
		1899-12-31 23:58:52	2	-30.46	0.11	7.69	0.13	-0.11	27.68	0.17	5.4	31.14	42.48	-6.66	-3.66	-0.0832582
		1899-12-31 23:58:52	2.02	-29.69	0.12	7.68	0.14	-0.12	27.64	0.18	6.17	30.37	41.82	-6.56	-3.56	-0.110871
		1899-12-31 23:58:52	2.03	-28.92	0.14	7.66	0.14	-0.13	27.59	0.19	6.94	29.6	41.17	-6.46	-3.46	-0.138363
		1899-12-31 23:58:52	2.04	-28.16	0.15	7.65	0.14	-0.14	27.55	0.2	7.7	28.84	40.51	-6.36	-3.36	-0.111964
		1899-12-31 23:58:52	2.06	-27.39	0.16	7.64	0.14	-0.15	27.5	0.21	8.47	28.07	39.85	-6.26	-3.26	-0.137912
		1899-12-31 23:58:52	2.08	-26.63	0.18	7.62	0.14	-0.16	27.44	0.21	9.23	27.31	39.19	-6.16	-3.16	-0.167337
		1899-12-31 23:58:52	2.09	-25.87	0.19	7.61	0.14	-0.17	27.39	0.22	9.99	26.55	38.53	-6.06	-3.06	-0.139168
		1899-12-31 23:58:53	2.11	-25.11	0.21	7.59	0.14	-0.18	27.33	0.23	10.75	25.79	37.87	-5.96	-2.96	-0.166667
		1899-12-31 23:58:53	2.14	-24.35	0.22	7.57	0.13	-0.19	27.26	0.23	11.51	25.03	37.21	-5.86	-2.86	-0.193982
		1899-12-31 23:58:53	2.16	-23.6	0.23	7.55	0.12	-0.2	27.19	0.23	12.27	24.27	36.54	-5.76	-2.76	-0.193485
		1899-12-31 23:58:53	2.18	-22.84	0.24	7.53	0.12	-0.21	27.12	0.24	13.02	23.52	35.87	-5.66	-2.66	-0.195561
		1899-12-31 23:58:53	2.21	-22.09	0.26	7.51	0.11	-0.21	27.05	0.24	13.77	22.77	35.2	-5.56	-2.56	-0.195057
		1899-12-31 23:58:53	2.23	-21.34	0.27	7.49	0.1	-0.22	26.97	0.24	14.52	22.02	34.53	-5.46	-2.46	-0.222305
		1899-12-31 23:58:53	2.26	-20.59	0.28	7.47	0.09	-0.22	26.89	0.24	15.27	21.27	33.85	-5.36	-2.36	-0.221646
		1899-12-31 23:58:53	2.29	-19.85	0.28	7.44	0.08	-0.23	26.81	0.24	16.02	20.52	33.17	-5.26	-2.26	-0.220988
		1899-12-31 23:58:53	2.32	-19.1	0.29	7.42	0.07	-0.23	26.73	0.24	16.76	19.78	32.49	-5.16	-2.16	-0.223307
		1899-12-31 23:58:53	2.35	-18.36	0.3	7.4	0.05	-0.23	26.65	0.24	17.5	19.04	31.8	-5.06	-2.06	-0.222639
		1899-12-31 23:58:54	2.38	-17.63	0.3	7.37	0.04	-0.24	26.57	0.24	18.24	18.3	31.11	-4.96	-1.96	-0.221972
		1899-12-31 23:58:54	2.41	-16.89	0.31	7.35	0.03	-0.24	26.48	0.24	18.98	17.56	30.42	-4.86	-1.86	-0.248921
		1899-12-31 23:58:54	2.44	-16.16	0.31	7.33	0.02	-0.24	26.4	0.24	19.71	16.83	29.73	-4.76	-1.76	-0.223575
		1899-12-31 23:58:54	2.47	-15.42	0.31	7.3	0	-0.24	26.31	0.24	20.44	16.1	29.03	-4.66	-1.66	-0.250713
		1899-12-31 23:58:54	2.5	-14.69	0.31	7.28	-0.01	-0.24	26.22	0.24	21.17	15.37	28.33	-4.56	-1.56	-0.249857
		1899-12-31 23:58:54	2.53	-13.97	0.31	7.25	-0.02	-0.24	26.14	0.24	21.9	14.64	27.63	-4.46	-1.46	-0.221377
		1899-12-31 23:58:54	2.56	-13.24	0.31	7.23	-0.03	-0.25	26.05	0.25	22.63	13.91	26.92	-4.36	-1.36	-0.24824
		1899-12-31 23:58:54	2.59	-12.52	0.3	7.2	-0.05	-0.25	25.96	0.26	23.35	13.19	26.21	-4.26	-1.26	-0.25082
		1899-12-31 23:58:54	2.62	-11.8	0.3	7.18	-0.06	-0.26	25.87	0.26	24.07	12.47	25.5	-4.16	-1.16	-0.249952
		1899-12-31 23:58:54	2.65	-11.09	0.29	7.15	-0.07	-0.26	25.77	0.27	24.79	11.75	24.79	-4.06	-1.06	-0.276706
		1899-12-31 23:58:55	2.68	-10.37	0.28	7.13	-0.09	-0.27	25.68	0.28	25.5	11.04	24.07	-3.96	-0.96	-0.251614
		1899-12-31 23:58:55	2.71	-9.66	0.27	7.1	-0.1	-0.27	25.58	0.29	26.21	10.33	23.35	-3.86	-0.86	-0.278539
		1899-12-31 23:58:55	2.74	-8.95	0.26	7.07	-0.11	-0.28	25.48	0.3	26.92	9.62	22.63	-3.76	-0.76	-0.277452
		1899-12-31 23:58:55	2.76	-8.25	0.25	7.04	-0.12	-0.29	25.37	0.31	27.63	8.91	21.9	-3.66	-0.66	-0.303942
		1899-12-31 23:58:55	2.79	-7.54	0.24	7.02	-0.14	-0.29	25.27	0.32	28.33	8.21	21.17	-3.56	-0.56	-0.279101
		1899-12-31 23:58:55	2.81	-6.84	0.23	6.99	-0.15	-0.29	25.16	0.33	29.03	7.51	20.44	-3.46	-0.46	-0.305737
		1899-12-31 23:58:55	2.83	-6.15	0.21	6.96	-0.16	-0.3	25.06	0.34	29.73	6.81	19.71	-3.36	-0.36	-0.276786
		1899-12-31 23:58:55	2.85	-5.45	0.19	6.93	-0.17	-0.3	24.95	0.34	30.42	6.12	18.98	-3.26	-0.26	-0.307585
		1899-12-31 23:58:55	2.87	-4.76	0.18	6.9	-0.18	-0.3	24.84	0.35	31.11	5.43	18.24	-3.16	-0.16	-0.306232
		1899-12-31 23:58:55	2.89	-4.07	0.16	6.87	-0.18	-0.3	24.73	0.35	31.8	4.74	17.5	-3.06	-0.06	-0.304879
		1899-12-31 23:58:56	2.9	-3.39	0.14	6.84	-0.19	-0.3	24.62	0.35	32.49	4.05	16.76	-2.96	0.04	-0.303526					24.62	4.05
		1899-12-31 23:58:56	2.92	-2.71	0.12	6.81	-0.19	-0.29	24.51	0.35	33.17	3.37	16.02	-2.86	0.14	-0.306617
		1899-12-31 23:58:56	2.93	-2.03	0.1	6.78	-0.2	-0.29	24.4	0.35	33.85	2.69	15.27	-2.76	0.24	-0.305244
		1899-12-31 23:58:56	2.94	-1.35	0.08	6.75	-0.2	-0.28	24.3	0.34	34.53	2.01	14.52	-2.66	0.34	-0.276303
		1899-12-31 23:58:56	2.94	-0.68	0.06	6.72	-0.2	-0.26	24.2	0.33	35.2	1.34	13.77	-2.56	0.44	-0.279275
		1899-12-31 23:58:56	2.95	-0.01	0.04	6.7	-0.21	-0.25	24.11	0.32	35.87	0.67	13.02	-2.46	0.54	-0.250363
		1899-12-31 23:58:56	2.95	0.66	0.02	6.67	-0.21	-0.23	24.02	0.31	36.54	0	12.27	-2.36	0.64	-0.24943
		1899-12-31 23:58:56	2.95	1.33	0	6.65	-0.21	-0.2	23.94	0.29	37.21	-0.67	11.51	-2.26	0.74	-0.220932
		1899-12-31 23:58:56	2.95	1.99	-0.02	6.63	-0.21	-0.18	23.87	0.28	37.87	-1.33	10.75	-2.16	0.84	-0.195631
		1899-12-31 23:58:56	2.95	2.66	-0.04	6.61	-0.21	-0.16	23.81	0.26	38.53	-1.99	9.99	-2.06	0.94	-0.167228
		1899-12-31 23:58:57	2.94	3.32	-0.06	6.6	-0.21	-0.13	23.76	0.25	39.19	-2.65	9.23	-1.96	1.04	-0.139035
		1899-12-31 23:58:57	2.93	3.98	-0.09	6.59	-0.22	-0.11	23.71	0.24	39.85	-3.31	8.47	-1.86	1.14	-0.138743
		1899-12-31 23:58:57	2.93	4.63	-0.11	6.58	-0.22	-0.09	23.68	0.24	40.51	-3.97	7.7	-1.76	1.24	-0.0831054
		1899-12-31 23:58:57	2.91	5.29	-0.13	6.57	-0.22	-0.07	23.65	0.23	41.17	-4.63	6.94	-1.66	1.34	-0.0830001
		1899-12-31 23:58:57	2.9	5.95	-0.15	6.56	-0.22	-0.06	23.63	0.23	41.82	-5.28	6.17	-1.56	1.44	-0.0561254
		1899-12-31 23:58:57	2.88	6.6	-0.17	6.56	-0.22	-0.04	23.61	0.23	42.48	-5.94	5.4	-1.46	1.54	-0.0552282
		1899-12-31 23:58:57	2.86	7.26	-0.2	6.55	-0.22	-0.03	23.6	0.23	43.14	-6.6	4.63	-1.36	1.64	-0.0275966
		1899-12-31 23:58:57	2.84	7.91	-0.22	6.55	-0.23	-0.02	23.59	0.23	43.79	-7.25	3.86	-1.26	1.74	-0.0280093
		1899-12-31 23:58:57	2.82	8.57	-0.24	6.55	-0.23	-0.02	23.58	0.23	44.45	-7.91	3.09	-1.16	1.84	-0.0275732
		1899-12-31 23:58:57	2.8	9.22	-0.26	6.54	-0.23	-0.02	23.58	0.23	45.1	-8.56	2.32	-1.06	1.94	0
		1899-12-31 23:58:58	2.77	9.88	-0.29	6.54	-0.23	-0.01	23.58	0.23	45.76	-9.22	1.55	-0.96	2.04	0
		1899-12-31 23:58:58	2.74	10.53	-0.31	6.54	-0.23	-0.01	23.58	0.23	46.41	-9.87	0.77	-0.86	2.14	0
		1899-12-31 23:58:58	2.71	11.19	-0.33	6.54	-0.23	-0.01	23.58	0.23	47.07	-10.53	0	-0.76	2.24	0							23.58	-10.53
8	1899-12-31 00:14:53	GlobalTime	X[m]	Y[m]	Vx[m/s]	Vy[m/s]	Ax[m/s2]	Ay[m/s2]	Speed[km/h]	Acceleration[m/s2]	Space[m]				3
		1899-12-31 00:14:48	1.32	-35.79	-0.01	10.03	0.05	-0.08	36.1	0.09	0	36.71	49.43	-4.29	-1.29
		1899-12-31 00:14:48	1.32	-34.79	0	10.02	0.07	-0.1	36.07	0.12	1	35.71	48.59	-4.19	-1.19	-0.0835301
		1899-12-31 00:14:48	1.32	-33.79	0	10.01	0.08	-0.13	36.03	0.15	2	34.71	47.75	-4.09	-1.09	-0.111265
		1899-12-31 00:14:49	1.32	-32.79	0.01	10	0.09	-0.15	35.98	0.18	3	33.71	46.91	-3.99	-0.99	-0.138908
		1899-12-31 00:14:49	1.33	-31.79	0.02	9.98	0.11	-0.17	35.93	0.2	4	32.71	46.06	-3.89	-0.89	-0.138715
		1899-12-31 00:14:49	1.33	-30.79	0.03	9.96	0.12	-0.2	35.86	0.23	5	31.71	45.22	-3.79	-0.79	-0.193877
		1899-12-31 00:14:49	1.33	-29.8	0.04	9.94	0.13	-0.22	35.79	0.26	6	30.71	44.38	-3.69	-0.69	-0.193499
		1899-12-31 00:14:49	1.34	-28.8	0.06	9.92	0.14	-0.24	35.71	0.28	6.99	29.72	43.53	-3.59	-0.59	-0.222908
		1899-12-31 00:14:49	1.34	-27.81	0.07	9.89	0.14	-0.26	35.62	0.3	7.98	28.73	42.69	-3.49	-0.49	-0.250175
		1899-12-31 00:14:49	1.35	-26.83	0.09	9.87	0.15	-0.29	35.52	0.32	8.97	27.74	41.84	-3.39	-0.39	-0.277232
		1899-12-31 00:14:49	1.36	-25.84	0.1	9.84	0.15	-0.31	35.41	0.34	9.95	26.76	40.99	-3.29	-0.29	-0.307158
		1899-12-31 00:14:49	1.37	-24.86	0.12	9.81	0.15	-0.33	35.3	0.36	10.93	25.78	40.14	-3.19	-0.19	-0.306205
		1899-12-31 00:14:49	1.38	-23.88	0.13	9.77	0.14	-0.35	35.18	0.38	11.91	24.8	39.29	-3.09	-0.09	-0.332955
		1899-12-31 00:14:50	1.4	-22.9	0.14	9.74	0.14	-0.37	35.05	0.39	12.89	23.82	38.43	-2.99	0.01	-0.359422					35.05	23.82
		1899-12-31 00:14:50	1.41	-21.93	0.16	9.7	0.13	-0.39	34.92	0.41	13.86	22.85	37.57	-2.89	0.11	-0.361783
		1899-12-31 00:14:50	1.43	-20.96	0.17	9.66	0.11	-0.41	34.78	0.42	14.83	21.88	36.71	-2.79	0.21	-0.388109
		1899-12-31 00:14:50	1.45	-20	0.18	9.62	0.1	-0.42	34.63	0.43	15.79	20.92	35.85	-2.69	0.31	-0.418415
		1899-12-31 00:14:50	1.47	-19.04	0.19	9.58	0.07	-0.44	34.48	0.44	16.75	19.96	34.98	-2.59	0.41	-0.416606
		1899-12-31 00:14:50	1.49	-18.09	0.2	9.53	0.05	-0.45	34.32	0.45	17.71	19	34.11	-2.49	0.51	-0.442387
		1899-12-31 00:14:50	1.51	-17.14	0.2	9.49	0.02	-0.46	34.15	0.46	18.66	18.05	33.23	-2.39	0.61	-0.472705
		1899-12-31 00:14:50	1.53	-16.19	0.2	9.44	-0.01	-0.47	33.99	0.47	19.61	17.1	32.36	-2.29	0.71	-0.442755
		1899-12-31 00:14:50	1.55	-15.25	0.2	9.39	-0.05	-0.48	33.82	0.48	20.55	16.16	31.48	-2.19	0.81	-0.473129
		1899-12-31 00:14:50	1.57	-14.31	0.19	9.34	-0.09	-0.49	33.64	0.49	21.48	15.23	30.59	-2.09	0.91	-0.503734
		1899-12-31 00:14:51	1.58	-13.38	0.18	9.29	-0.13	-0.49	33.47	0.5	22.42	14.29	29.7	-1.99	1.01	-0.468245
		1899-12-31 00:14:51	1.6	-12.45	0.17	9.25	-0.18	-0.49	33.29	0.52	23.34	13.37	28.8	-1.89	1.11	-0.503925
		1899-12-31 00:14:51	1.62	-11.53	0.15	9.2	-0.23	-0.48	33.11	0.54	24.27	12.44	27.91	-1.79	1.21	-0.495818
		1899-12-31 00:14:51	1.63	-10.61	0.12	9.15	-0.29	-0.48	32.94	0.56	25.18	11.53	27	-1.69	1.31	-0.476042
		1899-12-31 00:14:51	1.64	-9.7	0.09	9.1	-0.34	-0.47	32.77	0.58	26.1	10.61	26.1	-1.59	1.41	-0.468444
		1899-12-31 00:14:51	1.65	-8.79	0.06	9.05	-0.4	-0.46	32.6	0.61	27	9.71	25.18	-1.49	1.51	-0.476376
		1899-12-31 00:14:51	1.65	-7.89	0.01	9.01	-0.46	-0.45	32.43	0.65	27.91	8.8	24.27	-1.39	1.61	-0.468691
		1899-12-31 00:14:51	1.65	-6.99	-0.03	8.96	-0.53	-0.44	32.27	0.69	28.8	7.91	23.34	-1.29	1.71	-0.448745
		1899-12-31 00:14:51	1.65	-6.1	-0.09	8.92	-0.59	-0.43	32.12	0.73	29.7	7.01	22.42	-1.19	1.81	-0.41403
		1899-12-31 00:14:51	1.63	-5.21	-0.15	8.88	-0.65	-0.42	31.96	0.78	30.59	6.12	21.48	-1.09	1.91	-0.444444
		1899-12-31 00:14:52	1.62	-4.32	-0.22	8.84	-0.72	-0.42	31.82	0.83	31.48	5.23	20.55	-0.99	2.01	-0.387068
		1899-12-31 00:14:52	1.59	-3.44	-0.29	8.79	-0.78	-0.41	31.68	0.88	32.36	4.35	19.61	-0.89	2.11	-0.389748
		1899-12-31 00:14:52	1.56	-2.56	-0.37	8.75	-0.84	-0.41	31.54	0.93	33.23	3.48	18.66	-0.79	2.21	-0.39249
		1899-12-31 00:14:52	1.52	-1.69	-0.46	8.71	-0.9	-0.4	31.41	0.99	34.11	2.6	17.71	-0.69	2.31	-0.358774
		1899-12-31 00:14:52	1.47	-0.82	-0.55	8.67	-0.96	-0.4	31.28	1.04	34.98	1.73	16.75	-0.59	2.41	-0.361399
		1899-12-31 00:14:52	1.41	0.05	-0.65	8.63	-1.01	-0.4	31.16	1.08	35.85	0.86	15.79	-0.49	2.51	-0.332269
		1899-12-31 00:14:52	1.34	0.91	-0.75	8.59	-1.06	-0.4	31.05	1.13	36.71	0	14.83	-0.39	2.61	-0.306987
		1899-12-31 00:14:52	1.26	1.76	-0.86	8.55	-1.1	-0.4	30.94	1.17	37.57	-0.86	13.86	-0.29	2.71	-0.305901
		1899-12-31 00:14:52	1.16	2.62	-0.97	8.51	-1.14	-0.4	30.84	1.21	38.43	-1.72	12.89	-0.19	2.81	-0.27715
		1899-12-31 00:14:52	1.06	3.47	-1.08	8.47	-1.18	-0.39	30.75	1.25	39.29	-2.58	11.91	-0.09	2.91	-0.248668
		1899-12-31 00:14:53	0.95	4.31	-1.2	8.43	-1.22	-0.39	30.67	1.28	40.14	-3.43	10.93	0.01	3.01	-0.223021							30.67	-3.43
		1899-12-31 00:14:53	0.82	5.15	-1.33	8.39	-1.24	-0.39	30.6	1.3	40.99	-4.28	9.95	0.11	3.11	-0.194667
		1899-12-31 00:14:53	0.68	5.99	-1.45	8.36	-1.27	-0.39	30.53	1.33	41.84	-5.13	8.97	0.21	3.21	-0.194222
		1899-12-31 00:14:53	0.53	6.83	-1.58	8.32	-1.29	-0.39	30.48	1.35	42.69	-5.98	7.98	0.31	3.31	-0.138458
		1899-12-31 00:14:53	0.37	7.65	-1.71	8.28	-1.3	-0.39	30.43	1.36	43.53	-6.82	6.99	0.41	3.41	-0.139876
		1899-12-31 00:14:53	0.19	8.48	-1.84	8.24	-1.32	-0.38	30.39	1.37	44.38	-7.67	6	0.51	3.51	-0.110421
		1899-12-31 00:14:53	0	9.3	-1.97	8.2	-1.33	-0.38	30.37	1.38	45.22	-8.51	5	0.61	3.61	-0.0558128
		1899-12-31 00:14:53	-0.2	10.12	-2.1	8.16	-1.33	-0.38	30.35	1.39	46.06	-9.35	4	0.71	3.71	-0.055776
		1899-12-31 00:14:53	-0.42	10.94	-2.24	8.12	-1.34	-0.38	30.34	1.39	46.91	-10.2	3	0.81	3.81	-0.0275463
		1899-12-31 00:14:53	-0.65	11.75	-2.37	8.09	-1.34	-0.38	30.34	1.39	47.75	-11.04	2	0.91	3.91	0
		1899-12-31 00:14:54	-0.9	12.55	-2.5	8.05	-1.34	-0.38	30.35	1.39	48.59	-11.88	1	1.01	4.01	0.0278742
		1899-12-31 00:14:54	-1.15	13.36	-2.64	8.01	-1.34	-0.38	30.36	1.39	49.43	-12.72	0	1.11	4.11	0.0278834
9	1899-12-31 21:38:43	GlobalTime	X[m]	Y[m]	Vx[m/s]	Vy[m/s]	Ax[m/s2]	Ay[m/s2]	Speed[km/h]	Acceleration[m/s2]	Space[m]
		1899-12-31 21:38:38	2.15	-35.94	0.05	6.71	0.05	0.1	24.15	0.11	0	36.1	48.5	-5.2	-2.2
		1899-12-31 21:38:38	2.15	-35.27	0.06	6.72	0.06	0.13	24.19	0.15	0.67	35.43	47.82	-5.1	-2.1	0.111341
		1899-12-31 21:38:38	2.16	-34.59	0.07	6.73	0.08	0.16	24.24	0.18	1.34	34.76	47.16	-5	-2	0.139436
		1899-12-31 21:38:38	2.17	-33.92	0.07	6.75	0.09	0.19	24.31	0.21	2.02	34.08	46.51	-4.9	-1.9	0.192816
		1899-12-31 21:38:38	2.17	-33.24	0.08	6.77	0.1	0.22	24.38	0.24	2.69	33.41	45.87	-4.8	-1.8	0.196258
		1899-12-31 21:38:38	2.18	-32.56	0.09	6.79	0.11	0.24	24.46	0.27	3.37	32.73	45.24	-4.7	-1.7	0.221678
		1899-12-31 21:38:38	2.19	-31.88	0.11	6.82	0.13	0.26	24.55	0.29	4.05	32.05	44.63	-4.6	-1.6	0.250255
		1899-12-31 21:38:39	2.2	-31.2	0.12	6.85	0.14	0.28	24.65	0.31	4.74	31.36	44.02	-4.5	-1.5	0.275094
		1899-12-31 21:38:39	2.22	-30.51	0.13	6.87	0.14	0.29	24.75	0.32	5.42	30.68	43.43	-4.4	-1.4	0.280274
		1899-12-31 21:38:39	2.23	-29.83	0.15	6.9	0.15	0.3	24.86	0.33	6.11	29.99	42.85	-4.3	-1.3	0.305125
		1899-12-31 21:38:39	2.25	-29.13	0.16	6.93	0.16	0.3	24.97	0.34	6.8	29.3	42.28	-4.2	-1.2	0.306478
		1899-12-31 21:38:39	2.26	-28.44	0.18	6.96	0.16	0.3	25.08	0.34	7.5	28.6	41.72	-4.1	-1.1	0.303434
		1899-12-31 21:38:39	2.28	-27.74	0.19	6.99	0.16	0.29	25.19	0.34	8.2	27.9	41.18	-4	-1	0.304767
		1899-12-31 21:38:39	2.3	-27.04	0.21	7.02	0.16	0.28	25.29	0.33	8.9	27.2	40.64	-3.9	-0.9	0.278219
		1899-12-31 21:38:39	2.32	-26.34	0.23	7.05	0.16	0.26	25.39	0.31	9.6	26.5	40.11	-3.8	-0.8	0.279321
		1899-12-31 21:38:39	2.35	-25.63	0.24	7.08	0.16	0.24	25.49	0.29	10.31	25.79	39.59	-3.7	-0.7	0.276474
		1899-12-31 21:38:39	2.37	-24.92	0.26	7.1	0.16	0.21	25.57	0.27	11.02	25.08	39.08	-3.6	-0.6	0.221961
		1899-12-31 21:38:40	2.4	-24.21	0.27	7.12	0.15	0.18	25.65	0.24	11.73	24.37	38.57	-3.5	-0.5	0.222657
		1899-12-31 21:38:40	2.43	-23.5	0.29	7.14	0.15	0.14	25.71	0.21	12.44	23.66	38.07	-3.4	-0.4	0.167449
		1899-12-31 21:38:40	2.46	-22.78	0.3	7.15	0.14	0.1	25.76	0.17	13.16	22.94	37.57	-3.3	-0.3	0.137898
		1899-12-31 21:38:40	2.49	-22.07	0.32	7.16	0.14	0.05	25.79	0.15	13.87	22.23	37.08	-3.2	-0.2	0.0840343
		1899-12-31 21:38:40	2.52	-21.35	0.33	7.16	0.13	0	25.81	0.13	14.59	21.51	36.59	-3.1	-0.1	0.0552984
		1899-12-31 21:38:40	2.55	-20.64	0.34	7.16	0.12	-0.06	25.8	0.13	15.31	20.79	36.1	-3	9.12337e-12	-0.0276545					25.8	20.79
		1899-12-31 21:38:40	2.59	-19.92	0.36	7.15	0.11	-0.12	25.78	0.16	16.02	20.08	35.61	-2.9	0.1	-0.0560555
		1899-12-31 21:38:40	2.63	-19.21	0.37	7.14	0.11	-0.18	25.73	0.21	16.74	19.36	35.12	-2.8	0.2	-0.138005
		1899-12-31 21:38:40	2.66	-18.49	0.38	7.12	0.1	-0.24	25.66	0.26	17.45	18.65	34.62	-2.7	0.3	-0.195471
		1899-12-31 21:38:40	2.7	-17.78	0.39	7.09	0.09	-0.31	25.57	0.33	18.17	17.93	34.12	-2.6	0.4	-0.247058
		1899-12-31 21:38:41	2.74	-17.08	0.4	7.06	0.09	-0.38	25.45	0.39	18.87	17.23	33.62	-2.5	0.5	-0.337434
		1899-12-31 21:38:41	2.78	-16.37	0.4	7.02	0.08	-0.45	25.31	0.46	19.58	16.52	33.11	-2.4	0.6	-0.38615
		1899-12-31 21:38:41	2.82	-15.67	0.41	6.97	0.08	-0.52	25.14	0.53	20.28	15.82	32.59	-2.3	0.7	-0.472691
		1899-12-31 21:38:41	2.86	-14.98	0.42	6.92	0.07	-0.59	24.94	0.59	20.98	15.12	32.06	-2.2	0.8	-0.552028
		1899-12-31 21:38:41	2.9	-14.29	0.43	6.86	0.06	-0.65	24.73	0.66	21.67	14.43	31.53	-2.1	0.9	-0.583216
		1899-12-31 21:38:41	2.95	-13.61	0.43	6.79	0.06	-0.72	24.49	0.72	22.35	13.75	30.99	-2	1	-0.670207
		1899-12-31 21:38:41	2.99	-12.93	0.44	6.71	0.05	-0.77	24.22	0.78	23.03	13.07	30.43	-1.9	1.1	-0.74617
		1899-12-31 21:38:41	3.04	-12.26	0.44	6.64	0.05	-0.83	23.94	0.83	23.69	12.41	29.87	-1.8	1.2	-0.788253
		1899-12-31 21:38:41	3.08	-11.6	0.45	6.55	0.04	-0.88	23.64	0.88	24.35	11.75	29.3	-1.7	1.3	-0.834386
		1899-12-31 21:38:41	3.13	-10.95	0.45	6.46	0.04	-0.92	23.32	0.92	25.01	11.09	28.72	-1.6	1.4	-0.878414
		1899-12-31 21:38:42	3.17	-10.31	0.46	6.37	0.03	-0.96	22.98	0.96	25.65	10.45	28.12	-1.5	1.5	-0.948954
		1899-12-31 21:38:42	3.22	-9.68	0.46	6.27	0.02	-0.99	22.63	0.99	26.28	9.82	27.52	-1.4	1.6	-0.977581
		1899-12-31 21:38:42	3.26	-9.06	0.46	6.17	0.02	-1.02	22.27	1.02	26.91	9.19	26.91	-1.3	1.7	-0.989859
		1899-12-31 21:38:42	3.31	-8.45	0.46	6.07	0.01	-1.03	21.91	1.03	27.52	8.58	26.28	-1.2	1.8	-1.00592
		1899-12-31 21:38:42	3.36	-7.85	0.46	5.96	0	-1.04	21.53	1.04	28.12	7.98	25.65	-1.1	1.9	-1.06142
		1899-12-31 21:38:42	3.4	-7.25	0.46	5.86	-0.01	-1.04	21.16	1.04	28.72	7.38	25.01	-1	2	-1.01564
		1899-12-31 21:38:42	3.45	-6.67	0.46	5.75	-0.02	-1.03	20.78	1.03	29.3	6.8	24.35	-0.9	2.1	-1.06011
		1899-12-31 21:38:42	3.49	-6.1	0.46	5.65	-0.03	-1.01	20.42	1.01	29.87	6.23	23.69	-0.8	2.2	-1.0039
		1899-12-31 21:38:42	3.54	-5.54	0.46	5.55	-0.04	-0.98	20.05	0.98	30.43	5.67	23.03	-0.7	2.3	-1.0316
		1899-12-31 21:38:42	3.59	-4.99	0.45	5.46	-0.05	-0.94	19.71	0.94	30.99	5.11	22.35	-0.6	2.4	-0.931327
		1899-12-31 21:38:43	3.63	-4.45	0.45	5.36	-0.07	-0.89	19.37	0.89	31.53	4.57	21.67	-0.5	2.5	-0.949303
		1899-12-31 21:38:43	3.67	-3.92	0.44	5.28	-0.08	-0.83	19.06	0.83	32.06	4.04	20.98	-0.4	2.6	-0.867204
		1899-12-31 21:38:43	3.72	-3.4	0.43	5.19	-0.1	-0.75	18.77	0.76	32.59	3.51	20.28	-0.3	2.7	-0.798589
		1899-12-31 21:38:43	3.76	-2.88	0.42	5.12	-0.12	-0.67	18.5	0.68	33.11	2.99	19.58	-0.2	2.8	-0.746595
		1899-12-31 21:38:43	3.8	-2.37	0.41	5.06	-0.14	-0.58	18.27	0.59	33.62	2.48	18.87	-0.1	2.9	-0.639759
		1899-12-31 21:38:43	3.84	-1.87	0.39	5	-0.16	-0.48	18.07	0.5	34.12	1.98	18.17	0	3	-0.560802							18.07	1.98
		1899-12-31 21:38:43	3.88	-1.37	0.37	4.96	-0.18	-0.37	17.91	0.41	34.62	1.48	17.45	0.1	3.1	-0.444198
		1899-12-31 21:38:43	3.92	-0.88	0.36	4.93	-0.21	-0.25	17.78	0.33	35.12	0.98	16.74	0.2	3.2	-0.358002
		1899-12-31 21:38:43	3.95	-0.38	0.33	4.9	-0.23	-0.14	17.7	0.27	35.61	0.49	16.02	0.3	3.3	-0.223482
		1899-12-31 21:38:43	3.98	0.11	0.31	4.9	-0.25	-0.01	17.66	0.25	36.1	0	15.31	0.4	3.4	-0.111363
		1899-12-31 21:38:44	4.01	0.59	0.28	4.9	-0.28	0.11	17.66	0.3	36.59	-0.49	14.59	0.5	3.5	0
		1899-12-31 21:38:44	4.04	1.09	0.26	4.91	-0.3	0.23	17.71	0.38	37.08	-0.98	13.87	0.6	3.6	0.139243
		1899-12-31 21:38:44	4.06	1.58	0.22	4.94	-0.32	0.35	17.81	0.48	37.57	-1.47	13.16	0.7	3.7	0.279667
		1899-12-31 21:38:44	4.08	2.07	0.19	4.98	-0.35	0.47	17.94	0.58	38.07	-1.97	12.44	0.8	3.8	0.358603
		1899-12-31 21:38:44	4.1	2.57	0.16	5.03	-0.37	0.58	18.12	0.68	38.57	-2.47	11.73	0.9	3.9	0.500833
		1899-12-31 21:38:44	4.12	3.08	0.12	5.09	-0.39	0.68	18.33	0.78	39.08	-2.98	11.02	1	4	0.579044
		1899-12-31 21:38:44	4.13	3.59	0.08	5.16	-0.4	0.77	18.59	0.87	39.59	-3.49	10.31	1.1	4.1	0.726156
		1899-12-31 21:38:44	4.13	4.11	0.04	5.24	-0.42	0.85	18.87	0.95	40.11	-4.01	9.6	1.2	4.2	0.778193
		1899-12-31 21:38:44	4.13	4.64	0	5.33	-0.43	0.93	19.19	1.02	40.64	-4.54	8.9	1.3	4.3	0.88656
		1899-12-31 21:38:44	4.13	5.18	-0.05	5.43	-0.44	0.99	19.53	1.08	41.18	-5.08	8.2	1.4	4.4	0.940558
		1899-12-31 21:38:45	4.12	5.73	-0.09	5.53	-0.45	1.04	19.9	1.13	41.72	-5.62	7.5	1.5	4.5	1.04232
		1899-12-31 21:38:45	4.11	6.28	-0.14	5.63	-0.46	1.08	20.28	1.17	42.28	-6.18	6.8	1.6	4.6	1.05189
		1899-12-31 21:38:45	4.1	6.85	-0.18	5.74	-0.47	1.11	20.68	1.2	42.85	-6.75	6.11	1.7	4.7	1.10895
		1899-12-31 21:38:45	4.08	7.43	-0.23	5.85	-0.48	1.13	21.08	1.23	43.43	-7.33	5.42	1.8	4.8	1.11111
		1899-12-31 21:38:45	4.05	8.02	-0.28	5.97	-0.48	1.15	21.5	1.25	44.02	-7.92	4.74	1.9	4.9	1.16941
		1899-12-31 21:38:45	4.02	8.63	-0.33	6.08	-0.48	1.16	21.92	1.26	44.63	-8.53	4.05	2	5	1.15338
		1899-12-31 21:38:45	3.98	9.24	-0.38	6.2	-0.49	1.17	22.35	1.27	45.24	-9.14	3.37	2.1	5.1	1.20396
		1899-12-31 21:38:45	3.94	9.87	-0.43	6.31	-0.49	1.17	22.78	1.27	45.87	-9.77	2.69	2.2	5.2	1.18839
		1899-12-31 21:38:45	3.9	10.5	-0.47	6.43	-0.49	1.18	23.22	1.28	46.51	-10.41	2.02	2.3	5.3	1.2201
		1899-12-31 21:38:45	3.85	11.15	-0.52	6.55	-0.49	1.18	23.65	1.28	47.16	-11.06	1.34	2.4	5.4	1.19623
		1899-12-31 21:38:46	3.79	11.81	-0.57	6.67	-0.49	1.18	24.09	1.28	47.82	-11.72	0.67	2.5	5.5	1.22788
		1899-12-31 21:38:46	3.73	12.49	-0.62	6.79	-0.49	1.18	24.53	1.28	48.5	-12.4	0	2.6	5.6	1.21373
10	1899-12-31 21:39:29	GlobalTime	X[m]	Y[m]	Vx[m/s]	Vy[m/s]	Ax[m/s2]	Ay[m/s2]	Speed[km/h]	Acceleration[m/s2]	Space[m]				3
		1899-12-31 21:39:25	2.24	-36.22	0.04	5.25	0.04	0	18.9	0.04	0	36.94	50.47	-4.2	-1.2
		1899-12-31 21:39:25	2.24	-35.7	0.04	5.25	0.05	-0.01	18.9	0.05	0.53	36.41	49.94	-4.1	-1.1	0
		1899-12-31 21:39:25	2.25	-35.17	0.05	5.25	0.06	-0.01	18.9	0.06	1.05	35.89	49.42	-4	-1	0
		1899-12-31 21:39:25	2.25	-34.65	0.05	5.25	0.07	-0.01	18.9	0.07	1.58	35.36	48.91	-3.9	-0.9	0
		1899-12-31 21:39:25	2.26	-34.12	0.06	5.25	0.08	-0.01	18.89	0.08	2.1	34.84	48.4	-3.8	-0.8	-0.0280375
		1899-12-31 21:39:25	2.26	-33.6	0.07	5.25	0.09	-0.01	18.89	0.09	2.62	34.32	47.91	-3.7	-0.7	0
		1899-12-31 21:39:26	2.27	-33.07	0.08	5.25	0.1	-0.02	18.88	0.1	3.15	33.79	47.42	-3.6	-0.6	-0.0274939
		1899-12-31 21:39:26	2.28	-32.55	0.09	5.24	0.1	-0.02	18.88	0.11	3.67	33.27	46.94	-3.5	-0.5	0
		1899-12-31 21:39:26	2.29	-32.02	0.1	5.24	0.11	-0.03	18.87	0.11	4.2	32.74	46.46	-3.4	-0.4	-0.0274793
		1899-12-31 21:39:26	2.3	-31.5	0.11	5.24	0.12	-0.03	18.86	0.12	4.72	32.22	45.99	-3.3	-0.3	-0.0279929
		1899-12-31 21:39:26	2.31	-30.98	0.12	5.23	0.12	-0.04	18.85	0.13	5.25	31.69	45.53	-3.2	-0.2	-0.0274502
		1899-12-31 21:39:26	2.32	-30.45	0.13	5.23	0.13	-0.04	18.84	0.13	5.77	31.17	45.07	-3.1	-0.1	-0.0279633
		1899-12-31 21:39:26	2.34	-29.93	0.15	5.23	0.13	-0.05	18.82	0.14	6.29	30.65	44.62	-3	9.12337e-12	-0.055882					18.82	30.65
		1899-12-31 21:39:26	2.35	-29.41	0.16	5.22	0.13	-0.06	18.81	0.14	6.82	30.12	44.17	-2.9	0.1	-0.027392
		1899-12-31 21:39:26	2.37	-28.89	0.17	5.22	0.13	-0.06	18.79	0.15	7.34	29.6	43.73	-2.8	0.2	-0.055793
		1899-12-31 21:39:26	2.39	-28.36	0.19	5.21	0.13	-0.07	18.76	0.15	7.86	29.08	43.29	-2.7	0.3	-0.0835782
		1899-12-31 21:39:27	2.41	-27.84	0.2	5.2	0.13	-0.08	18.74	0.15	8.38	28.56	42.85	-2.6	0.4	-0.0556446
		1899-12-31 21:39:27	2.43	-27.32	0.21	5.19	0.13	-0.09	18.71	0.16	8.9	28.04	42.42	-2.5	0.5	-0.0833556
		1899-12-31 21:39:27	2.45	-26.8	0.23	5.18	0.13	-0.1	18.68	0.16	9.42	27.52	41.99	-2.4	0.6	-0.083222
		1899-12-31 21:39:27	2.47	-26.29	0.24	5.17	0.12	-0.11	18.64	0.16	9.94	27	41.56	-2.3	0.7	-0.110755
		1899-12-31 21:39:27	2.5	-25.77	0.25	5.16	0.12	-0.12	18.61	0.17	10.45	26.49	41.14	-2.2	0.8	-0.0845361
		1899-12-31 21:39:27	2.52	-25.25	0.26	5.15	0.11	-0.13	18.56	0.17	10.97	25.97	40.72	-2.1	0.9	-0.137887
		1899-12-31 21:39:27	2.55	-24.74	0.27	5.14	0.1	-0.14	18.52	0.18	11.49	25.45	40.29	-2	1	-0.110043
		1899-12-31 21:39:27	2.58	-24.23	0.28	5.12	0.09	-0.16	18.47	0.18	12	24.94	39.87	-1.9	1.1	-0.13991
		1899-12-31 21:39:27	2.61	-23.72	0.29	5.11	0.08	-0.17	18.41	0.19	12.51	24.43	39.45	-1.8	1.2	-0.167393
		1899-12-31 21:39:27	2.64	-23.21	0.3	5.09	0.07	-0.18	18.35	0.19	13.02	23.92	39.03	-1.7	1.3	-0.166848
		1899-12-31 21:39:28	2.67	-22.7	0.31	5.07	0.06	-0.19	18.29	0.2	13.53	23.41	38.61	-1.6	1.4	-0.166304
		1899-12-31 21:39:28	2.7	-22.19	0.31	5.05	0.05	-0.2	18.22	0.21	14.04	22.9	38.2	-1.5	1.5	-0.193332
		1899-12-31 21:39:28	2.73	-21.69	0.32	5.03	0.04	-0.21	18.15	0.22	14.54	22.4	37.78	-1.4	1.6	-0.196443
		1899-12-31 21:39:28	2.76	-21.19	0.32	5.01	0.03	-0.22	18.07	0.22	15.05	21.89	37.36	-1.3	1.7	-0.219196
		1899-12-31 21:39:28	2.79	-20.69	0.32	4.99	0.01	-0.23	17.99	0.23	15.55	21.39	36.94	-1.2	1.8	-0.222593
		1899-12-31 21:39:28	2.83	-20.19	0.32	4.96	0	-0.24	17.9	0.24	16.05	20.89	36.52	-1.1	1.9	-0.249236
		1899-12-31 21:39:28	2.86	-19.69	0.32	4.94	-0.02	-0.25	17.82	0.25	16.54	20.4	36.11	-1	2	-0.224994
		1899-12-31 21:39:28	2.89	-19.2	0.32	4.91	-0.03	-0.25	17.73	0.26	17.04	19.9	35.69	-0.9	2.1	-0.246875
		1899-12-31 21:39:28	2.92	-18.71	0.32	4.89	-0.05	-0.26	17.63	0.26	17.53	19.41	35.27	-0.8	2.2	-0.278408
		1899-12-31 21:39:28	2.95	-18.22	0.31	4.86	-0.06	-0.27	17.54	0.27	18.02	18.92	34.85	-0.7	2.3	-0.249221
		1899-12-31 21:39:29	2.99	-17.74	0.31	4.83	-0.08	-0.27	17.44	0.28	18.5	18.44	34.43	-0.6	2.4	-0.281154
		1899-12-31 21:39:29	3.02	-17.26	0.3	4.81	-0.1	-0.27	17.34	0.29	18.98	17.96	34.01	-0.5	2.5	-0.279546
		1899-12-31 21:39:29	3.05	-16.78	0.29	4.78	-0.11	-0.28	17.24	0.3	19.46	17.48	33.6	-0.4	2.6	-0.277939
		1899-12-31 21:39:29	3.07	-16.3	0.28	4.75	-0.13	-0.28	17.14	0.31	19.94	17	33.18	-0.3	2.7	-0.276331
		1899-12-31 21:39:29	3.1	-15.83	0.26	4.73	-0.14	-0.28	17.04	0.31	20.42	16.52	32.76	-0.2	2.8	-0.274724
		1899-12-31 21:39:29	3.13	-15.36	0.25	4.7	-0.16	-0.28	16.93	0.32	20.89	16.05	32.34	-0.1	2.9	-0.306729
		1899-12-31 21:39:29	3.15	-14.89	0.23	4.67	-0.18	-0.27	16.83	0.33	21.36	15.58	31.92	0	3	-0.277121							16.83	15.58
		1899-12-31 21:39:29	3.17	-14.42	0.21	4.64	-0.19	-0.27	16.73	0.33	21.82	15.12	31.5	0.1	3.1	-0.281468
		1899-12-31 21:39:29	3.19	-13.96	0.19	4.62	-0.2	-0.27	16.63	0.34	22.29	14.65	31.07	0.2	3.2	-0.273838
		1899-12-31 21:39:29	3.21	-13.5	0.17	4.59	-0.21	-0.26	16.53	0.34	22.75	14.19	30.65	0.3	3.3	-0.278113
		1899-12-31 21:39:30	3.23	-13.04	0.15	4.56	-0.22	-0.26	16.44	0.34	23.21	13.73	30.23	0.4	3.4	-0.248868
		1899-12-31 21:39:30	3.24	-12.59	0.13	4.54	-0.23	-0.25	16.34	0.34	23.66	13.28	29.8	0.5	3.5	-0.281036
		1899-12-31 21:39:30	3.25	-12.13	0.11	4.51	-0.24	-0.24	16.25	0.34	24.11	12.83	29.37	0.6	3.6	-0.251466
		1899-12-31 21:39:30	3.26	-11.68	0.08	4.49	-0.25	-0.24	16.16	0.34	24.56	12.38	28.95	0.7	3.7	-0.250077
		1899-12-31 21:39:30	3.27	-11.24	0.06	4.47	-0.25	-0.23	16.08	0.34	25.01	11.93	28.52	0.8	3.8	-0.221125
		1899-12-31 21:39:30	3.27	-10.79	0.03	4.44	-0.25	-0.22	15.99	0.34	25.46	11.48	28.08	0.9	3.9	-0.247454
		1899-12-31 21:39:30	3.28	-10.35	0.01	4.42	-0.25	-0.21	15.91	0.33	25.9	11.04	27.65	1	4	-0.223765
		1899-12-31 21:39:30	3.27	-9.91	-0.02	4.4	-0.25	-0.21	15.84	0.33	26.34	10.6	27.22	1.1	4.1	-0.194874
		1899-12-31 21:39:30	3.27	-9.47	-0.04	4.38	-0.25	-0.2	15.76	0.32	26.78	10.16	26.78	1.2	4.2	-0.221661
		1899-12-31 21:39:30	3.27	-9.03	-0.07	4.36	-0.25	-0.19	15.69	0.32	27.22	9.72	26.34	1.3	4.3	-0.193033
		1899-12-31 21:39:31	3.26	-8.6	-0.09	4.34	-0.25	-0.19	15.63	0.31	27.65	9.29	25.9	1.4	4.4	-0.168605
		1899-12-31 21:39:31	3.25	-8.16	-0.12	4.32	-0.24	-0.18	15.56	0.3	28.08	8.86	25.46	1.5	4.5	-0.195889
		1899-12-31 21:39:31	3.23	-7.73	-0.14	4.3	-0.24	-0.17	15.5	0.3	28.52	8.42	25.01	1.6	4.6	-0.163405
		1899-12-31 21:39:31	3.22	-7.3	-0.17	4.29	-0.24	-0.16	15.44	0.29	28.95	7.99	24.56	1.7	4.7	-0.166559
		1899-12-31 21:39:31	3.2	-6.87	-0.19	4.27	-0.24	-0.16	15.39	0.28	29.37	7.57	24.11	1.8	4.8	-0.141599
		1899-12-31 21:39:31	3.18	-6.45	-0.21	4.26	-0.23	-0.15	15.34	0.28	29.8	7.14	23.66	1.9	4.9	-0.137857
		1899-12-31 21:39:31	3.16	-6.02	-0.24	4.24	-0.23	-0.13	15.29	0.27	30.23	6.71	23.21	2	5	-0.137408
		1899-12-31 21:39:31	3.13	-5.6	-0.26	4.23	-0.24	-0.12	15.25	0.27	30.65	6.29	22.75	2.1	5.1	-0.112213
		1899-12-31 21:39:31	3.11	-5.18	-0.29	4.22	-0.24	-0.11	15.21	0.27	31.07	5.87	22.29	2.2	5.2	-0.111919
		1899-12-31 21:39:31	3.08	-4.76	-0.31	4.21	-0.25	-0.1	15.18	0.27	31.5	5.44	21.82	2.3	5.3	-0.0817991
		1899-12-31 21:39:32	3.04	-4.34	-0.33	4.2	-0.26	-0.09	15.15	0.27	31.92	5.02	21.36	2.4	5.4	-0.0835813
		1899-12-31 21:39:32	3.01	-3.92	-0.36	4.19	-0.27	-0.08	15.13	0.28	32.34	4.6	20.89	2.5	5.5	-0.055629
		1899-12-31 21:39:32	2.97	-3.5	-0.39	4.18	-0.29	-0.07	15.11	0.29	32.76	4.18	20.42	2.6	5.6	-0.0555556
		1899-12-31 21:39:32	2.93	-3.08	-0.42	4.17	-0.3	-0.07	15.09	0.31	33.18	3.76	19.94	2.7	5.7	-0.0554821
		1899-12-31 21:39:32	2.89	-2.66	-0.45	4.16	-0.33	-0.06	15.08	0.33	33.6	3.34	19.46	2.8	5.8	-0.0277135
		1899-12-31 21:39:32	2.84	-2.25	-0.48	4.16	-0.35	-0.06	15.07	0.36	34.01	2.93	18.98	2.9	5.9	-0.0283706
		1899-12-31 21:39:32	2.79	-1.83	-0.52	4.15	-0.38	-0.06	15.06	0.39	34.43	2.51	18.5	3	6	-0.0276767
		1899-12-31 21:39:32	2.74	-1.42	-0.56	4.15	-0.41	-0.07	15.06	0.42	34.85	2.09	18.02	3.1	6.1	0
		1899-12-31 21:39:32	2.68	-1	-0.6	4.14	-0.45	-0.07	15.05	0.45	35.27	1.67	17.53	3.2	6.2	-0.0276584
		1899-12-31 21:39:32	2.62	-0.59	-0.65	4.13	-0.49	-0.08	15.05	0.49	35.69	1.25	17.04	3.3	6.3	0
		1899-12-31 21:39:33	2.55	-0.18	-0.7	4.12	-0.53	-0.09	15.05	0.53	36.11	0.83	16.54	3.4	6.4	0
		1899-12-31 21:39:33	2.48	0.23	-0.75	4.11	-0.57	-0.11	15.05	0.58	36.52	0.42	16.05	3.5	6.5	0
		1899-12-31 21:39:33	2.4	0.64	-0.81	4.1	-0.61	-0.12	15.05	0.63	36.94	0	15.55	3.6	6.6	0
		1899-12-31 21:39:33	2.32	1.05	-0.87	4.09	-0.66	-0.13	15.05	0.67	37.36	-0.42	15.05	3.7	6.7	0
		1899-12-31 21:39:33	2.23	1.46	-0.94	4.07	-0.71	-0.15	15.05	0.73	37.78	-0.84	14.54	3.8	6.8	0
		1899-12-31 21:39:33	2.13	1.87	-1.01	4.06	-0.76	-0.16	15.06	0.78	38.2	-1.26	14.04	3.9	6.9	0.0276584
		1899-12-31 21:39:33	2.02	2.27	-1.09	4.04	-0.81	-0.18	15.07	0.83	38.61	-1.67	13.53	4	7	0.0283518
		1899-12-31 21:39:33	1.91	2.68	-1.17	4.02	-0.86	-0.2	15.09	0.88	39.03	-2.09	13.02	4.1	7.1	0.0554086
		1899-12-31 21:39:33	1.79	3.08	-1.26	4	-0.91	-0.21	15.11	0.93	39.45	-2.51	12.51	4.2	7.2	0.0554821
		1899-12-31 21:39:33	1.66	3.48	-1.35	3.98	-0.96	-0.23	15.14	0.98	39.87	-2.93	12	4.3	7.3	0.0833609
		1899-12-31 21:39:34	1.52	3.87	-1.45	3.96	-1	-0.25	15.17	1.03	40.29	-3.35	11.49	4.4	7.4	0.0835262
		1899-12-31 21:39:34	1.37	4.27	-1.55	3.93	-1.05	-0.26	15.22	1.08	40.72	-3.78	10.97	4.5	7.5	0.136332
		1899-12-31 21:39:34	1.21	4.66	-1.66	3.91	-1.09	-0.28	15.27	1.13	41.14	-4.2	10.45	4.6	7.6	0.140037
		1899-12-31 21:39:34	1.04	5.05	-1.77	3.88	-1.13	-0.29	15.34	1.17	41.56	-4.62	9.94	4.7	7.7	0.196824
		1899-12-31 21:39:34	0.85	5.44	-1.88	3.85	-1.17	-0.31	15.42	1.21	41.99	-5.05	9.42	4.8	7.8	0.220787
		1899-12-31 21:39:34	0.66	5.82	-2	3.82	-1.21	-0.32	15.51	1.25	42.42	-5.48	8.9	4.9	7.9	0.249758
		1899-12-31 21:39:34	0.45	6.2	-2.12	3.78	-1.24	-0.33	15.62	1.28	42.85	-5.91	8.38	5	8	0.307233
		1899-12-31 21:39:34	0.24	6.58	-2.25	3.75	-1.27	-0.34	15.74	1.31	43.29	-6.35	7.86	5.1	8.1	0.329966
		1899-12-31 21:39:34	0.01	6.95	-2.37	3.72	-1.3	-0.35	15.87	1.34	43.73	-6.79	7.34	5.2	8.2	0.360313
		1899-12-31 21:39:34	-0.24	7.32	-2.5	3.68	-1.32	-0.36	16.02	1.37	44.17	-7.23	6.82	5.3	8.3	0.419429
		1899-12-31 21:39:35	-0.5	7.69	-2.64	3.64	-1.34	-0.37	16.19	1.39	44.62	-7.68	6.29	5.4	8.4	0.469453
		1899-12-31 21:39:35	-0.77	8.05	-2.77	3.61	-1.35	-0.38	16.37	1.41	45.07	-8.13	5.77	5.5	8.5	0.502469
		1899-12-31 21:39:35	-1.05	8.41	-2.91	3.57	-1.37	-0.39	16.57	1.42	45.53	-8.59	5.25	5.6	8.6	0.552536
		1899-12-31 21:39:35	-1.35	8.76	-3.04	3.53	-1.38	-0.39	16.78	1.43	45.99	-9.05	4.72	5.7	8.7	0.587384
		1899-12-31 21:39:35	-1.66	9.11	-3.18	3.49	-1.39	-0.4	17	1.44	46.46	-9.52	4.2	5.8	8.8	0.610028
		1899-12-31 21:39:35	-1.98	9.46	-3.32	3.45	-1.39	-0.41	17.24	1.45	46.94	-10	3.67	5.9	8.9	0.660494
		1899-12-31 21:39:35	-2.32	9.8	-3.46	3.41	-1.4	-0.41	17.49	1.46	47.42	-10.48	3.15	6	9	0.69786
		1899-12-31 21:39:35	-2.68	10.14	-3.6	3.37	-1.4	-0.41	17.75	1.46	47.91	-10.97	2.62	6.1	9.1	0.721403
		1899-12-31 21:39:35	-3.04	10.48	-3.74	3.33	-1.4	-0.41	18.02	1.46	48.4	-11.46	2.1	6.2	9.2	0.760417
		1899-12-31 21:39:35	-3.42	10.81	-3.88	3.28	-1.4	-0.42	18.3	1.46	48.91	-11.97	1.58	6.3	9.3	0.769305
		1899-12-31 21:39:36	-3.82	11.13	-4.02	3.24	-1.4	-0.42	18.6	1.46	49.42	-12.48	1.05	6.4	9.4	0.837418
		1899-12-31 21:39:36	-4.23	11.46	-4.16	3.2	-1.4	-0.42	18.9	1.46	49.94	-13	0.53	6.5	9.5	0.834669
		1899-12-31 21:39:36	-4.65	11.77	-4.3	3.16	-1.4	-0.42	19.21	1.46	50.47	-13.53	0	6.6	9.6	0.859983
11	1899-12-31 21:45:16	GlobalTime	X[m]	Y[m]	Vx[m/s]	Vy[m/s]	Ax[m/s2]	Ay[m/s2]	Speed[km/h]	Acceleration[m/s2]	Space[m]				3
		1899-12-31 21:45:06	2.21	-36.3	0	6.5	-0.02	-0.02	23.41	0.03	0	36.87	48.17	-9.5	-6.5
		1899-12-31 21:45:06	2.21	-35.65	0	6.5	-0.03	-0.03	23.4	0.04	0.65	36.22	47.52	-9.4	-6.4	-0.0277837
		1899-12-31 21:45:07	2.21	-35	-0.01	6.5	-0.04	-0.03	23.39	0.05	1.3	35.57	46.87	-9.3	-6.3	-0.0277718
		1899-12-31 21:45:07	2.21	-34.35	-0.01	6.49	-0.04	-0.04	23.38	0.06	1.95	34.92	46.23	-9.2	-6.2	-0.02776
		1899-12-31 21:45:07	2.21	-33.7	-0.02	6.49	-0.05	-0.04	23.37	0.07	2.6	34.27	45.59	-9.1	-6.1	-0.0277481
		1899-12-31 21:45:07	2.21	-33.05	-0.02	6.49	-0.05	-0.05	23.35	0.07	3.25	33.62	44.95	-9	-6	-0.0554606
		1899-12-31 21:45:07	2.2	-32.41	-0.03	6.48	-0.06	-0.06	23.33	0.08	3.9	32.97	44.31	-8.9	-5.9	-0.0554131
		1899-12-31 21:45:07	2.2	-31.76	-0.03	6.47	-0.06	-0.06	23.31	0.09	4.54	32.33	43.68	-8.8	-5.8	-0.0562307
		1899-12-31 21:45:07	2.2	-31.11	-0.04	6.47	-0.06	-0.07	23.29	0.09	5.19	31.68	43.05	-8.7	-5.7	-0.0553181
		1899-12-31 21:45:07	2.19	-30.47	-0.04	6.46	-0.06	-0.08	23.26	0.1	5.84	31.03	42.42	-8.6	-5.6	-0.0828882
		1899-12-31 21:45:07	2.19	-29.82	-0.05	6.45	-0.06	-0.08	23.23	0.1	6.48	30.39	41.79	-8.5	-5.5	-0.0840748
		1899-12-31 21:45:07	2.18	-29.17	-0.06	6.44	-0.06	-0.09	23.2	0.11	7.13	29.74	41.17	-8.4	-5.4	-0.0826745
		1899-12-31 21:45:08	2.18	-28.53	-0.06	6.44	-0.06	-0.1	23.17	0.11	7.77	29.1	40.55	-8.3	-5.3	-0.0838578
		1899-12-31 21:45:08	2.17	-27.89	-0.07	6.43	-0.05	-0.11	23.13	0.12	8.42	28.45	39.93	-8.2	-5.2	-0.109924
		1899-12-31 21:45:08	2.16	-27.25	-0.07	6.41	-0.04	-0.12	23.09	0.13	9.06	27.81	39.31	-8.1	-5.1	-0.111449
		1899-12-31 21:45:08	2.16	-26.6	-0.08	6.4	-0.04	-0.13	23.05	0.14	9.7	27.17	38.7	-8	-5	-0.111256
		1899-12-31 21:45:08	2.15	-25.97	-0.08	6.39	-0.03	-0.14	23	0.14	10.34	26.53	38.09	-7.9	-4.9	-0.138798
		1899-12-31 21:45:08	2.14	-25.33	-0.08	6.37	-0.02	-0.15	22.95	0.15	10.98	25.89	37.48	-7.8	-4.8	-0.138497
		1899-12-31 21:45:08	2.13	-24.69	-0.08	6.36	0	-0.17	22.89	0.17	11.61	25.26	36.87	-7.7	-4.7	-0.16843
		1899-12-31 21:45:08	2.12	-24.06	-0.08	6.34	0.01	-0.18	22.83	0.18	12.25	24.62	36.27	-7.6	-4.6	-0.165365
		1899-12-31 21:45:08	2.11	-23.42	-0.08	6.32	0.02	-0.19	22.76	0.19	12.88	23.99	35.66	-7.5	-4.5	-0.19543
		1899-12-31 21:45:08	2.11	-22.79	-0.08	6.3	0.03	-0.2	22.69	0.21	13.51	23.36	35.06	-7.4	-4.4	-0.19483
		1899-12-31 21:45:09	2.1	-22.16	-0.08	6.28	0.05	-0.22	22.62	0.22	14.14	22.73	34.47	-7.3	-4.3	-0.19423
		1899-12-31 21:45:09	2.09	-21.53	-0.07	6.26	0.06	-0.23	22.54	0.23	14.77	22.1	33.87	-7.2	-4.2	-0.221242
		1899-12-31 21:45:09	2.08	-20.91	-0.07	6.24	0.07	-0.24	22.46	0.25	15.39	21.48	33.27	-7.1	-4.1	-0.224014
		1899-12-31 21:45:09	2.08	-20.29	-0.06	6.21	0.09	-0.25	22.37	0.26	16.02	20.85	32.68	-7	-4	-0.247079
		1899-12-31 21:45:09	2.07	-19.67	-0.05	6.19	0.1	-0.25	22.28	0.27	16.64	20.23	32.09	-6.9	-3.9	-0.250056
		1899-12-31 21:45:09	2.07	-19.05	-0.04	6.16	0.11	-0.26	22.19	0.28	17.25	19.62	31.5	-6.8	-3.8	-0.253131
		1899-12-31 21:45:09	2.06	-18.43	-0.03	6.14	0.12	-0.26	22.09	0.29	17.87	19	30.91	-6.7	-3.7	-0.275538
		1899-12-31 21:45:09	2.06	-17.82	-0.01	6.11	0.13	-0.26	22	0.29	18.48	18.39	30.32	-6.6	-3.6	-0.250968
		1899-12-31 21:45:09	2.06	-17.21	0	6.08	0.14	-0.26	21.9	0.3	19.09	17.78	29.74	-6.5	-3.5	-0.277651
		1899-12-31 21:45:09	2.06	-16.61	0.01	6.06	0.14	-0.26	21.81	0.3	19.7	17.17	29.15	-6.4	-3.4	-0.248805
		1899-12-31 21:45:10	2.06	-16	0.03	6.03	0.15	-0.25	21.72	0.29	20.3	16.57	28.57	-6.3	-3.3	-0.25191
		1899-12-31 21:45:10	2.07	-15.4	0.04	6.01	0.15	-0.25	21.62	0.29	20.9	15.97	27.98	-6.2	-3.2	-0.278678
		1899-12-31 21:45:10	2.07	-14.8	0.06	5.98	0.15	-0.24	21.54	0.28	21.5	15.37	27.4	-6.1	-3.1	-0.222016
		1899-12-31 21:45:10	2.08	-14.2	0.07	5.96	0.15	-0.22	21.46	0.27	22.1	14.77	26.81	-6	-3	-0.221193
		1899-12-31 21:45:10	2.09	-13.61	0.09	5.94	0.15	-0.2	21.38	0.25	22.7	14.17	26.23	-5.9	-2.9	-0.22037
		1899-12-31 21:45:10	2.1	-13.01	0.1	5.92	0.14	-0.19	21.31	0.23	23.29	13.58	25.64	-5.8	-2.8	-0.195406
		1899-12-31 21:45:10	2.11	-12.42	0.11	5.9	0.14	-0.16	21.24	0.21	23.88	12.99	25.06	-5.7	-2.7	-0.194765
		1899-12-31 21:45:10	2.12	-11.83	0.13	5.88	0.13	-0.14	21.19	0.19	24.47	12.4	24.47	-5.6	-2.6	-0.138725
		1899-12-31 21:45:10	2.13	-11.25	0.14	5.87	0.12	-0.12	21.14	0.17	25.06	11.81	23.88	-5.5	-2.5	-0.138398
		1899-12-31 21:45:10	2.15	-10.66	0.15	5.86	0.11	-0.09	21.1	0.15	25.64	11.23	23.29	-5.4	-2.4	-0.112388
		1899-12-31 21:45:11	2.16	-10.08	0.16	5.85	0.1	-0.07	21.07	0.12	26.23	10.64	22.7	-5.3	-2.3	-0.0827252
		1899-12-31 21:45:11	2.18	-9.49	0.17	5.85	0.09	-0.04	21.05	0.1	26.81	10.06	22.1	-5.2	-2.2	-0.0560345
		1899-12-31 21:45:11	2.2	-8.91	0.18	5.84	0.08	-0.01	21.04	0.08	27.4	9.47	21.5	-5.1	-2.1	-0.0275228
		1899-12-31 21:45:11	2.22	-8.32	0.19	5.84	0.06	0.01	21.04	0.07	27.98	8.89	20.9	-5	-2	0
		1899-12-31 21:45:11	2.23	-7.74	0.19	5.84	0.05	0.04	21.05	0.06	28.57	8.3	20.3	-4.9	-1.9	0.0275228
		1899-12-31 21:45:11	2.25	-7.15	0.2	5.85	0.04	0.06	21.07	0.07	29.15	7.72	19.7	-4.8	-1.8	0.0560345
		1899-12-31 21:45:11	2.27	-6.57	0.2	5.86	0.02	0.08	21.09	0.08	29.74	7.13	19.09	-4.7	-1.7	0.0551371
		1899-12-31 21:45:11	2.29	-5.98	0.2	5.86	0.01	0.1	21.12	0.1	30.32	6.55	18.48	-4.6	-1.6	0.0842313
		1899-12-31 21:45:11	2.32	-5.39	0.2	5.87	-0.01	0.12	21.16	0.12	30.91	5.96	17.87	-4.5	-1.5	0.110588
		1899-12-31 21:45:11	2.34	-4.81	0.2	5.89	-0.02	0.14	21.21	0.14	31.5	5.37	17.25	-4.4	-1.4	0.138529
		1899-12-31 21:45:12	2.36	-4.22	0.2	5.9	-0.03	0.15	21.26	0.15	32.09	4.78	16.64	-4.3	-1.3	0.138856
		1899-12-31 21:45:12	2.38	-3.63	0.2	5.92	-0.05	0.16	21.31	0.17	32.68	4.19	16.02	-4.2	-1.2	0.139183
		1899-12-31 21:45:12	2.4	-3.03	0.19	5.93	-0.06	0.18	21.37	0.19	33.27	3.6	15.39	-4.1	-1.1	0.167451
		1899-12-31 21:45:12	2.41	-2.44	0.18	5.95	-0.08	0.19	21.44	0.21	33.87	3	14.77	-4	-1	0.192689
		1899-12-31 21:45:12	2.43	-1.84	0.18	5.97	-0.09	0.2	21.5	0.22	34.47	2.4	14.14	-3.9	-0.9	0.165664
		1899-12-31 21:45:12	2.45	-1.25	0.17	5.99	-0.11	0.21	21.58	0.24	35.06	1.81	13.51	-3.8	-0.8	0.225361
		1899-12-31 21:45:12	2.47	-0.65	0.15	6.01	-0.13	0.22	21.65	0.25	35.66	1.21	12.88	-3.7	-0.7	0.194579
		1899-12-31 21:45:12	2.48	-0.04	0.14	6.03	-0.14	0.23	21.73	0.27	36.27	0.6	12.25	-3.6	-0.6	0.21949
		1899-12-31 21:45:12	2.49	0.56	0.13	6.06	-0.16	0.23	21.81	0.28	36.87	0	11.61	-3.5	-0.5	0.223971
		1899-12-31 21:45:12	2.51	1.17	0.11	6.08	-0.17	0.23	21.89	0.29	37.48	-0.61	10.98	-3.4	-0.4	0.221109
		1899-12-31 21:45:13	2.52	1.78	0.09	6.1	-0.19	0.24	21.98	0.3	38.09	-1.22	10.34	-3.3	-0.3	0.249715
		1899-12-31 21:45:13	2.52	2.39	0.07	6.13	-0.2	0.24	22.06	0.31	38.7	-1.83	9.7	-3.2	-0.2	0.222829
		1899-12-31 21:45:13	2.53	3	0.05	6.15	-0.21	0.24	22.14	0.32	39.31	-2.44	9.06	-3.1	-0.1	0.223639
		1899-12-31 21:45:13	2.53	3.62	0.03	6.17	-0.23	0.24	22.23	0.33	39.93	-3.06	8.42	-3	-1.00613e-11	0.248488					22.23	-3.06
		1899-12-31 21:45:13	2.54	4.24	0.01	6.2	-0.24	0.24	22.32	0.34	40.55	-3.68	7.77	-2.9	0.1	0.249496
		1899-12-31 21:45:13	2.54	4.86	-0.02	6.22	-0.25	0.24	22.4	0.35	41.17	-4.3	7.13	-2.8	0.2	0.22262
		1899-12-31 21:45:13	2.53	5.48	-0.04	6.25	-0.26	0.25	22.49	0.36	41.79	-4.92	6.48	-2.7	0.3	0.2514
		1899-12-31 21:45:13	2.53	6.11	-0.07	6.27	-0.27	0.25	22.58	0.36	42.42	-5.55	5.84	-2.6	0.4	0.248402
		1899-12-31 21:45:13	2.52	6.74	-0.09	6.3	-0.27	0.25	22.67	0.37	43.05	-6.18	5.19	-2.5	0.5	0.249394
		1899-12-31 21:45:13	2.51	7.37	-0.12	6.32	-0.28	0.26	22.76	0.38	43.68	-6.81	4.54	-2.4	0.6	0.250386
		1899-12-31 21:45:14	2.5	8	-0.15	6.35	-0.28	0.26	22.86	0.38	44.31	-7.44	3.9	-2.3	0.7	0.27937
		1899-12-31 21:45:14	2.48	8.64	-0.18	6.37	-0.28	0.26	22.96	0.39	44.95	-8.08	3.25	-2.2	0.8	0.27621
		1899-12-31 21:45:14	2.46	9.28	-0.21	6.4	-0.29	0.26	23.05	0.39	45.59	-8.72	2.6	-2.1	0.9	0.24962
		1899-12-31 21:45:14	2.44	9.92	-0.23	6.43	-0.29	0.27	23.15	0.39	46.23	-9.36	1.95	-2	1	0.278501
		1899-12-31 21:45:14	2.41	10.56	-0.26	6.45	-0.29	0.27	23.25	0.39	46.87	-10	1.3	-1.9	1.1	0.279707
		1899-12-31 21:45:14	2.39	11.21	-0.29	6.48	-0.29	0.27	23.35	0.39	47.52	-10.65	0.65	-1.8	1.2	0.276591
		1899-12-31 21:45:14	2.36	11.86	-0.32	6.51	-0.29	0.27	23.45	0.39	48.17	-11.3	0	-1.7	1.3	0.277778
12	1899-12-31 21:48:37	GlobalTime	X[m]	Y[m]	Vx[m/s]	Vy[m/s]	Ax[m/s2]	Ay[m/s2]	Speed[km/h]	Acceleration[m/s2]	Space[m]				3
		1899-12-31 21:48:35	2.51	-36.27	0.02	5.8	-0.02	0	20.89	0.02	0	37.03	45.61	-2.87	0.13						20.89	37.03
		1899-12-31 21:48:35	2.51	-35.69	0.02	5.8	-0.03	0	20.89	0.03	0.58	36.45	44.88	-2.77	0.23	0
		1899-12-31 21:48:35	2.51	-35.11	0.01	5.8	-0.04	0	20.89	0.04	1.16	35.87	44.15	-2.67	0.33	0
		1899-12-31 21:48:35	2.51	-34.53	0.01	5.8	-0.04	0	20.89	0.04	1.74	35.29	43.43	-2.57	0.43	0
		1899-12-31 21:48:35	2.51	-33.95	0	5.8	-0.05	0	20.89	0.05	2.32	34.71	42.71	-2.47	0.53	0
		1899-12-31 21:48:35	2.51	-33.37	0	5.8	-0.05	0.01	20.89	0.05	2.9	34.13	41.99	-2.37	0.63	0
		1899-12-31 21:48:35	2.51	-32.79	-0.01	5.8	-0.06	0.01	20.9	0.06	3.48	33.55	41.27	-2.27	0.73	0.0277977
		1899-12-31 21:48:35	2.51	-32.21	-0.01	5.81	-0.06	0.01	20.9	0.07	4.06	32.97	40.56	-2.17	0.83	0
		1899-12-31 21:48:35	2.51	-31.63	-0.02	5.81	-0.07	0.02	20.91	0.07	4.64	32.39	39.85	-2.07	0.93	0.027811
		1899-12-31 21:48:35	2.51	-31.05	-0.03	5.81	-0.07	0.02	20.91	0.08	5.22	31.81	39.14	-1.97	1.03	0
		1899-12-31 21:48:36	2.5	-30.46	-0.03	5.81	-0.08	0.03	20.92	0.08	5.8	31.23	38.43	-1.87	1.13	0.0278243
		1899-12-31 21:48:36	2.5	-29.88	-0.04	5.81	-0.08	0.03	20.93	0.09	6.39	30.64	37.73	-1.77	1.23	0.0273658
		1899-12-31 21:48:36	2.5	-29.3	-0.05	5.82	-0.08	0.04	20.95	0.09	6.97	30.06	37.03	-1.67	1.33	0.0557152
		1899-12-31 21:48:36	2.49	-28.72	-0.06	5.82	-0.08	0.05	20.96	0.1	7.55	29.48	36.33	-1.57	1.43	0.0278776
		1899-12-31 21:48:36	2.48	-28.14	-0.07	5.83	-0.08	0.06	20.98	0.1	8.13	28.9	35.64	-1.47	1.53	0.055795
		1899-12-31 21:48:36	2.48	-27.55	-0.07	5.83	-0.08	0.06	21	0.11	8.72	28.31	34.95	-1.37	1.63	0.0549017
		1899-12-31 21:48:36	2.47	-26.97	-0.08	5.84	-0.08	0.07	21.03	0.11	9.3	27.73	34.27	-1.27	1.73	0.0838721
		1899-12-31 21:48:36	2.46	-26.39	-0.09	5.85	-0.08	0.08	21.06	0.12	9.88	27.15	33.58	-1.17	1.83	0.0839919
		1899-12-31 21:48:36	2.45	-25.8	-0.1	5.86	-0.08	0.09	21.09	0.12	10.47	26.56	32.9	-1.07	1.93	0.082686
		1899-12-31 21:48:36	2.44	-25.21	-0.11	5.87	-0.08	0.1	21.12	0.13	11.06	25.97	32.23	-0.97	2.03	0.0828037
		1899-12-31 21:48:37	2.43	-24.63	-0.11	5.88	-0.08	0.11	21.16	0.13	11.64	25.39	31.56	-0.87	2.13	0.112495
		1899-12-31 21:48:37	2.42	-24.04	-0.12	5.89	-0.07	0.12	21.2	0.14	12.23	24.8	30.89	-0.77	2.23	0.110797
		1899-12-31 21:48:37	2.41	-23.45	-0.13	5.9	-0.07	0.13	21.25	0.15	12.82	24.21	30.23	-0.67	2.33	0.138791
		1899-12-31 21:48:37	2.39	-22.86	-0.14	5.91	-0.07	0.14	21.29	0.16	13.41	23.62	29.56	-0.57	2.43	0.111268
		1899-12-31 21:48:37	2.38	-22.27	-0.14	5.93	-0.06	0.15	21.35	0.16	14	23.03	28.91	-0.47	2.53	0.167294
		1899-12-31 21:48:37	2.36	-21.67	-0.15	5.94	-0.06	0.16	21.4	0.17	14.6	22.43	28.25	-0.37	2.63	0.137442
		1899-12-31 21:48:37	2.35	-21.08	-0.15	5.96	-0.05	0.18	21.46	0.18	15.19	21.84	27.6	-0.27	2.73	0.168158
		1899-12-31 21:48:37	2.33	-20.48	-0.16	5.98	-0.04	0.19	21.53	0.19	15.79	21.24	26.95	-0.17	2.83	0.193499
		1899-12-31 21:48:37	2.32	-19.88	-0.16	6	-0.04	0.2	21.6	0.2	16.39	20.64	26.31	-0.07	2.93	0.194129
		1899-12-31 21:48:37	2.3	-19.28	-0.17	6.02	-0.03	0.21	21.67	0.21	16.99	20.04	25.67	0.03	3.03	0.19476							21.67	20.04
		1899-12-31 21:48:38	2.28	-18.68	-0.17	6.04	-0.02	0.22	21.75	0.22	17.59	19.44	25.03	0.13	3.13	0.223354
		1899-12-31 21:48:38	2.27	-18.07	-0.17	6.06	-0.01	0.23	21.83	0.23	18.2	18.83	24.39	0.23	3.23	0.220502
		1899-12-31 21:48:38	2.25	-17.47	-0.17	6.09	0.01	0.25	21.92	0.25	18.81	18.22	23.76	0.33	3.33	0.249032
		1899-12-31 21:48:38	2.23	-16.86	-0.17	6.11	0.02	0.26	22.01	0.26	19.42	17.61	23.13	0.43	3.43	0.250057
		1899-12-31 21:48:38	2.22	-16.24	-0.17	6.14	0.03	0.27	22.1	0.27	20.03	17	22.51	0.53	3.53	0.251082
		1899-12-31 21:48:38	2.2	-15.63	-0.16	6.16	0.04	0.27	22.2	0.28	20.64	16.39	21.88	0.63	3.63	0.280181
		1899-12-31 21:48:38	2.18	-15.01	-0.16	6.19	0.06	0.28	22.3	0.29	21.26	15.77	21.26	0.73	3.73	0.276907
		1899-12-31 21:48:38	2.17	-14.39	-0.15	6.22	0.07	0.29	22.4	0.3	21.88	15.15	20.64	0.83	3.83	0.278151
		1899-12-31 21:48:38	2.15	-13.77	-0.14	6.25	0.09	0.29	22.5	0.3	22.51	14.52	20.03	0.93	3.93	0.274961
		1899-12-31 21:48:38	2.14	-13.14	-0.14	6.28	0.1	0.3	22.61	0.31	23.13	13.9	19.42	1.03	4.03	0.308773
		1899-12-31 21:48:39	2.13	-12.51	-0.13	6.31	0.11	0.3	22.71	0.32	23.76	13.27	18.81	1.13	4.13	0.277533
		1899-12-31 21:48:39	2.11	-11.88	-0.11	6.34	0.13	0.3	22.82	0.33	24.39	12.64	18.2	1.23	4.23	0.306701
		1899-12-31 21:48:39	2.1	-11.24	-0.1	6.37	0.14	0.31	22.93	0.34	25.03	12	17.59	1.33	4.33	0.303367
		1899-12-31 21:48:39	2.09	-10.61	-0.09	6.4	0.15	0.31	23.04	0.34	25.67	11.36	16.99	1.43	4.43	0.304826
		1899-12-31 21:48:39	2.09	-9.96	-0.07	6.43	0.16	0.31	23.15	0.35	26.31	10.72	16.39	1.53	4.53	0.306285
		1899-12-31 21:48:39	2.08	-9.32	-0.06	6.46	0.16	0.32	23.26	0.36	26.95	10.08	15.79	1.63	4.63	0.307744
		1899-12-31 21:48:39	2.07	-8.67	-0.04	6.49	0.17	0.32	23.38	0.37	27.6	9.43	15.19	1.73	4.73	0.332194
		1899-12-31 21:48:39	2.07	-8.02	-0.02	6.53	0.17	0.33	23.5	0.37	28.25	8.78	14.6	1.83	4.83	0.333903
		1899-12-31 21:48:39	2.07	-7.37	0	6.56	0.18	0.33	23.61	0.38	28.91	8.12	14	1.93	4.93	0.302919
		1899-12-31 21:48:39	2.07	-6.71	0.01	6.59	0.18	0.34	23.74	0.38	29.56	7.47	13.41	2.03	5.03	0.365355
		1899-12-31 21:48:40	2.07	-6.05	0.03	6.63	0.17	0.35	23.86	0.39	30.23	6.8	12.82	2.13	5.13	0.328911
		1899-12-31 21:48:40	2.08	-5.38	0.05	6.66	0.17	0.35	23.98	0.39	30.89	6.14	12.23	2.23	5.23	0.335578
		1899-12-31 21:48:40	2.08	-4.72	0.06	6.7	0.17	0.36	24.11	0.39	31.56	5.47	11.64	2.33	5.33	0.359988
		1899-12-31 21:48:40	2.09	-4.04	0.08	6.73	0.16	0.36	24.24	0.39	32.23	4.8	11.06	2.43	5.43	0.361935
		1899-12-31 21:48:40	2.1	-3.37	0.1	6.77	0.16	0.36	24.37	0.39	32.9	4.13	10.47	2.53	5.53	0.363881
		1899-12-31 21:48:40	2.11	-2.69	0.11	6.8	0.16	0.36	24.5	0.39	33.58	3.45	9.88	2.63	5.63	0.360447
		1899-12-31 21:48:40	2.12	-2.01	0.13	6.84	0.15	0.35	24.63	0.38	34.27	2.76	9.3	2.73	5.73	0.357113
		1899-12-31 21:48:40	2.13	-1.32	0.14	6.88	0.15	0.34	24.76	0.37	34.95	2.08	8.72	2.83	5.83	0.364283
		1899-12-31 21:48:40	2.15	-0.63	0.16	6.91	0.14	0.34	24.88	0.37	35.64	1.39	8.13	2.93	5.93	0.333065
		1899-12-31 21:48:40	2.17	0.06	0.17	6.94	0.14	0.33	25	0.36	36.33	0.7	7.55	3.03	6.03	0.334675
		1899-12-31 21:48:41	2.18	0.76	0.19	6.98	0.14	0.32	25.12	0.35	37.03	0	6.97	3.13	6.13	0.331481
		1899-12-31 21:48:41	2.2	1.45	0.2	7.01	0.13	0.31	25.23	0.34	37.73	-0.7	6.39	3.23	6.23	0.305252
		1899-12-31 21:48:41	2.22	2.16	0.21	7.04	0.13	0.3	25.35	0.33	38.43	-1.4	5.8	3.33	6.33	0.334524
		1899-12-31 21:48:41	2.25	2.86	0.23	7.07	0.13	0.29	25.45	0.32	39.14	-2.11	5.22	3.43	6.43	0.276039
		1899-12-31 21:48:41	2.27	3.57	0.24	7.1	0.13	0.28	25.56	0.31	39.85	-2.82	4.64	3.53	6.53	0.304898
		1899-12-31 21:48:41	2.29	4.28	0.25	7.12	0.13	0.27	25.66	0.3	40.56	-3.53	4.06	3.63	6.63	0.278321
		1899-12-31 21:48:41	2.32	4.99	0.27	7.15	0.13	0.27	25.76	0.3	41.27	-4.24	3.48	3.73	6.73	0.279408
		1899-12-31 21:48:41	2.35	5.71	0.28	7.18	0.13	0.26	25.85	0.29	41.99	-4.96	2.9	3.83	6.83	0.248891
		1899-12-31 21:48:41	2.38	6.43	0.29	7.2	0.13	0.26	25.95	0.29	42.71	-5.68	2.32	3.93	6.93	0.277563
		1899-12-31 21:48:41	2.41	7.15	0.3	7.23	0.13	0.26	26.04	0.29	43.43	-6.4	1.74	4.03	7.03	0.250723
		1899-12-31 21:48:42	2.44	7.88	0.32	7.25	0.13	0.26	26.14	0.29	44.15	-7.12	1.16	4.13	7.13	0.2796
		1899-12-31 21:48:42	2.47	8.6	0.33	7.28	0.13	0.26	26.23	0.29	44.88	-7.85	0.58	4.23	7.23	0.249096
		1899-12-31 21:48:42	2.5	9.33	0.34	7.3	0.13	0.26	26.33	0.29	45.61	-8.58	0	4.33	7.33	0.277778
13	1899-12-31 21:55:37	GlobalTime	X[m]	Y[m]	Vx[m/s]	Vy[m/s]	Ax[m/s2]	Ay[m/s2]	Speed[km/h]	Acceleration[m/s2]	Space[m]				3
		1899-12-31 21:55:25	3.79	-36.26	-0.12	2.68	0.01	0	9.65	0.01	0	36.73	40.82	-11.3	-8.3
		1899-12-31 21:55:26	3.78	-36	-0.12	2.68	0.02	0	9.65	0.02	0.27	36.46	40.55	-11.2	-8.2	0
		1899-12-31 21:55:26	3.77	-35.73	-0.12	2.68	0.02	0	9.65	0.02	0.54	36.19	40.28	-11.1	-8.1	0
		1899-12-31 21:55:26	3.76	-35.46	-0.11	2.68	0.02	0	9.65	0.02	0.8	35.93	40	-11	-8	0
		1899-12-31 21:55:26	3.75	-35.19	-0.11	2.68	0.03	0	9.65	0.03	1.07	35.66	39.73	-10.9	-7.9	0
		1899-12-31 21:55:26	3.74	-34.92	-0.11	2.68	0.03	0	9.65	0.03	1.34	35.39	39.46	-10.8	-7.8	0
		1899-12-31 21:55:26	3.73	-34.66	-0.1	2.68	0.04	0	9.65	0.04	1.61	35.12	39.19	-10.7	-7.7	0
		1899-12-31 21:55:26	3.72	-34.39	-0.1	2.68	0.04	0	9.65	0.04	1.88	34.85	38.91	-10.6	-7.6	0
		1899-12-31 21:55:26	3.71	-34.12	-0.1	2.68	0.04	0.01	9.65	0.04	2.14	34.59	38.64	-10.5	-7.5	0
		1899-12-31 21:55:26	3.7	-33.85	-0.09	2.68	0.05	0.01	9.66	0.05	2.41	34.32	38.36	-10.4	-7.4	0.027592
		1899-12-31 21:55:26	3.69	-33.58	-0.09	2.68	0.05	0.01	9.66	0.05	2.68	34.05	38.09	-10.3	-7.3	0
		1899-12-31 21:55:27	3.68	-33.32	-0.08	2.68	0.05	0.01	9.66	0.05	2.95	33.78	37.82	-10.2	-7.2	0
		1899-12-31 21:55:27	3.67	-33.05	-0.08	2.68	0.05	0.01	9.67	0.06	3.22	33.51	37.54	-10.1	-7.1	0.0276206
		1899-12-31 21:55:27	3.66	-32.78	-0.07	2.69	0.06	0.02	9.67	0.06	3.49	33.24	37.27	-10	-7	0
		1899-12-31 21:55:27	3.66	-32.51	-0.07	2.69	0.06	0.02	9.68	0.06	3.76	32.97	37	-9.9	-6.9	0.0276492
		1899-12-31 21:55:27	3.65	-32.24	-0.06	2.69	0.06	0.02	9.68	0.06	4.02	32.71	36.73	-9.8	-6.8	0
		1899-12-31 21:55:27	3.65	-31.97	-0.05	2.69	0.06	0.03	9.69	0.07	4.29	32.44	36.46	-9.7	-6.7	0.0276778
		1899-12-31 21:55:27	3.64	-31.7	-0.05	2.69	0.06	0.03	9.7	0.07	4.56	32.17	36.19	-9.6	-6.6	0.0277063
		1899-12-31 21:55:27	3.64	-31.43	-0.04	2.7	0.06	0.03	9.71	0.07	4.83	31.9	35.93	-9.5	-6.5	0.0277349
		1899-12-31 21:55:27	3.63	-31.16	-0.04	2.7	0.07	0.04	9.72	0.07	5.1	31.63	35.66	-9.4	-6.4	0.0277635
		1899-12-31 21:55:27	3.63	-30.89	-0.03	2.7	0.07	0.04	9.74	0.08	5.37	31.36	35.4	-9.3	-6.3	0.0556127
		1899-12-31 21:55:28	3.63	-30.62	-0.02	2.71	0.07	0.04	9.75	0.08	5.64	31.09	35.14	-9.2	-6.2	0.0278492
		1899-12-31 21:55:28	3.62	-30.35	-0.02	2.71	0.07	0.04	9.76	0.08	5.91	30.82	34.88	-9.1	-6.1	0.0278778
		1899-12-31 21:55:28	3.62	-30.08	-0.01	2.72	0.07	0.04	9.78	0.08	6.19	30.54	34.63	-9	-6	0.053847
		1899-12-31 21:55:28	3.62	-29.81	0	2.72	0.07	0.04	9.8	0.08	6.46	30.27	34.37	-8.9	-5.9	0.0559556
		1899-12-31 21:55:28	3.62	-29.54	0	2.73	0.07	0.05	9.81	0.08	6.73	30	34.12	-8.8	-5.8	0.0280207
		1899-12-31 21:55:28	3.62	-29.26	0.01	2.73	0.07	0.05	9.83	0.08	7	29.73	33.88	-8.7	-5.7	0.0561271
		1899-12-31 21:55:28	3.62	-28.99	0.02	2.73	0.06	0.05	9.84	0.08	7.28	29.45	33.63	-8.6	-5.6	0.0271026
		1899-12-31 21:55:28	3.63	-28.72	0.02	2.74	0.06	0.05	9.86	0.08	7.55	29.18	33.39	-8.5	-5.5	0.0562986
		1899-12-31 21:55:28	3.63	-28.44	0.03	2.74	0.06	0.05	9.88	0.07	7.82	28.91	33.14	-8.4	-5.4	0.0564129
		1899-12-31 21:55:28	3.63	-28.17	0.04	2.75	0.06	0.04	9.89	0.07	8.1	28.63	32.9	-8.3	-5.3	0.0272404
		1899-12-31 21:55:29	3.64	-27.89	0.04	2.75	0.05	0.04	9.91	0.07	8.37	28.36	32.66	-8.2	-5.2	0.0565844
		1899-12-31 21:55:29	3.64	-27.62	0.05	2.76	0.05	0.04	9.92	0.06	8.65	28.08	32.42	-8.1	-5.1	0.0273231
		1899-12-31 21:55:29	3.65	-27.34	0.05	2.76	0.05	0.04	9.94	0.06	8.92	27.81	32.18	-8	-5	0.0567558
		1899-12-31 21:55:29	3.65	-27.07	0.06	2.76	0.04	0.03	9.95	0.05	9.2	27.53	31.93	-7.9	-4.9	0.0274058
		1899-12-31 21:55:29	3.66	-26.79	0.06	2.77	0.04	0.03	9.96	0.05	9.48	27.25	31.69	-7.8	-4.8	0.0274333
		1899-12-31 21:55:29	3.66	-26.51	0.06	2.77	0.03	0.02	9.97	0.04	9.75	26.98	31.45	-7.7	-4.7	0.0284779
		1899-12-31 21:55:29	3.67	-26.23	0.07	2.77	0.03	0.02	9.98	0.03	10.03	26.7	31.2	-7.6	-4.6	0.0274884
		1899-12-31 21:55:29	3.68	-25.96	0.07	2.77	0.02	0.01	9.99	0.03	10.31	26.42	30.95	-7.5	-4.5	0.027516
		1899-12-31 21:55:29	3.68	-25.68	0.07	2.77	0.02	0.01	9.99	0.02	10.59	26.14	30.7	-7.4	-4.4	0
		1899-12-31 21:55:29	3.69	-25.4	0.07	2.77	0.01	0	9.99	0.01	10.86	25.87	30.45	-7.3	-4.3	0
		1899-12-31 21:55:30	3.7	-25.13	0.07	2.77	0.01	-0.01	9.99	0.01	11.14	25.59	30.19	-7.2	-4.2	0
		1899-12-31 21:55:30	3.71	-24.85	0.08	2.77	0	-0.01	9.99	0.01	11.42	25.31	29.93	-7.1	-4.1	0
		1899-12-31 21:55:30	3.71	-24.57	0.08	2.77	0	-0.02	9.98	0.02	11.7	25.03	29.66	-7	-4	-0.027516
		1899-12-31 21:55:30	3.72	-24.29	0.08	2.77	0	-0.03	9.97	0.03	11.97	24.76	29.39	-6.9	-3.9	-0.0285065
		1899-12-31 21:55:30	3.73	-24.02	0.07	2.77	-0.01	-0.03	9.96	0.03	12.25	24.48	29.12	-6.8	-3.8	-0.0274609
		1899-12-31 21:55:30	3.74	-23.74	0.07	2.76	-0.01	-0.04	9.95	0.04	12.53	24.2	28.84	-6.7	-3.7	-0.0274333
		1899-12-31 21:55:30	3.74	-23.46	0.07	2.76	-0.01	-0.04	9.93	0.04	12.8	23.93	28.56	-6.6	-3.6	-0.056813
		1899-12-31 21:55:30	3.75	-23.19	0.07	2.75	-0.01	-0.05	9.92	0.05	13.08	23.65	28.28	-6.5	-3.5	-0.0273506
		1899-12-31 21:55:30	3.76	-22.91	0.07	2.75	-0.01	-0.05	9.9	0.05	13.35	23.38	27.99	-6.4	-3.4	-0.0566415
		1899-12-31 21:55:30	3.76	-22.64	0.07	2.74	-0.01	-0.05	9.88	0.05	13.63	23.1	27.71	-6.3	-3.3	-0.0545084
		1899-12-31 21:55:31	3.77	-22.36	0.07	2.74	-0.01	-0.05	9.86	0.05	13.9	22.83	27.41	-6.2	-3.2	-0.0564129
		1899-12-31 21:55:31	3.78	-22.09	0.07	2.73	-0.01	-0.05	9.85	0.05	14.18	22.55	27.12	-6.1	-3.1	-0.0271577
		1899-12-31 21:55:31	3.78	-21.82	0.06	2.73	-0.01	-0.05	9.83	0.05	14.45	22.28	26.83	-6	-3	-0.0562414
		1899-12-31 21:55:31	3.79	-21.55	0.06	2.72	-0.01	-0.05	9.81	0.05	14.72	22.01	26.53	-5.9	-2.9	-0.0561271
		1899-12-31 21:55:31	3.8	-21.27	0.06	2.72	-0.01	-0.04	9.79	0.05	14.99	21.74	26.23	-5.8	-2.8	-0.0560128
		1899-12-31 21:55:31	3.8	-21	0.06	2.71	-0.02	-0.04	9.78	0.04	15.27	21.46	25.94	-5.7	-2.7	-0.0269648
		1899-12-31 21:55:31	3.81	-20.73	0.06	2.71	-0.02	-0.03	9.76	0.04	15.54	21.19	25.64	-5.6	-2.6	-0.0558413
		1899-12-31 21:55:31	3.82	-20.46	0.06	2.71	-0.02	-0.02	9.75	0.03	15.81	20.92	25.34	-5.5	-2.5	-0.0278778
		1899-12-31 21:55:31	3.82	-20.19	0.06	2.71	-0.02	-0.02	9.74	0.03	16.08	20.65	25.04	-5.4	-2.4	-0.0278492
		1899-12-31 21:55:31	3.83	-19.92	0.05	2.7	-0.02	-0.01	9.74	0.02	16.35	20.38	24.75	-5.3	-2.3	0
		1899-12-31 21:55:32	3.83	-19.65	0.05	2.7	-0.02	0	9.74	0.02	16.62	20.11	24.45	-5.2	-2.2	0
		1899-12-31 21:55:32	3.84	-19.38	0.05	2.7	-0.03	0.01	9.74	0.03	16.89	19.84	24.16	-5.1	-2.1	0
		1899-12-31 21:55:32	3.84	-19.11	0.05	2.71	-0.03	0.02	9.74	0.03	17.16	19.57	23.86	-5	-2	0
		1899-12-31 21:55:32	3.85	-18.84	0.04	2.71	-0.03	0.02	9.75	0.04	17.43	19.3	23.57	-4.9	-1.9	0.0278492
		1899-12-31 21:55:32	3.85	-18.57	0.04	2.71	-0.03	0.03	9.76	0.05	17.7	19.03	23.28	-4.8	-1.8	0.0278778
		1899-12-31 21:55:32	3.85	-18.29	0.04	2.71	-0.04	0.04	9.77	0.05	17.97	18.76	22.99	-4.7	-1.7	0.0279064
		1899-12-31 21:55:32	3.86	-18.02	0.03	2.72	-0.04	0.05	9.78	0.06	18.25	18.48	22.7	-4.6	-1.6	0.0269373
		1899-12-31 21:55:32	3.86	-17.75	0.03	2.72	-0.04	0.06	9.8	0.07	18.52	18.21	22.42	-4.5	-1.5	0.0559556
		1899-12-31 21:55:32	3.86	-17.48	0.02	2.73	-0.05	0.07	9.82	0.08	18.79	17.94	22.13	-4.4	-1.4	0.05607
		1899-12-31 21:55:32	3.86	-17.2	0.02	2.74	-0.05	0.07	9.85	0.09	19.06	17.67	21.85	-4.3	-1.3	0.0843193
		1899-12-31 21:55:33	3.87	-16.93	0.01	2.74	-0.06	0.08	9.88	0.1	19.34	17.39	21.56	-4.2	-1.2	0.0815559
		1899-12-31 21:55:33	3.87	-16.66	0.01	2.75	-0.06	0.09	9.91	0.1	19.61	17.12	21.28	-4.1	-1.1	0.0848337
		1899-12-31 21:55:33	3.87	-16.38	0	2.76	-0.06	0.09	9.94	0.11	19.89	16.84	21	-4	-1	0.0820519
		1899-12-31 21:55:33	3.87	-16.1	0	2.77	-0.06	0.1	9.97	0.12	20.16	16.57	20.72	-3.9	-0.9	0.0853481
		1899-12-31 21:55:33	3.87	-15.83	-0.01	2.78	-0.07	0.1	10.01	0.12	20.44	16.29	20.44	-3.8	-0.8	0.110119
		1899-12-31 21:55:33	3.87	-15.55	-0.02	2.79	-0.07	0.11	10.05	0.13	20.72	16.01	20.16	-3.7	-0.7	0.11056
		1899-12-31 21:55:33	3.86	-15.27	-0.02	2.8	-0.07	0.11	10.08	0.13	21	15.73	19.89	-3.6	-0.6	0.0832093
		1899-12-31 21:55:33	3.86	-14.99	-0.03	2.81	-0.07	0.12	10.13	0.14	21.28	15.45	19.61	-3.5	-0.5	0.139233
		1899-12-31 21:55:33	3.86	-14.71	-0.04	2.82	-0.07	0.12	10.17	0.14	21.56	15.17	19.34	-3.4	-0.4	0.111883
		1899-12-31 21:55:33	3.85	-14.42	-0.04	2.84	-0.07	0.12	10.21	0.14	21.85	14.88	19.06	-3.3	-0.3	0.10845
		1899-12-31 21:55:34	3.85	-14.14	-0.05	2.85	-0.07	0.13	10.26	0.15	22.13	14.6	18.79	-3.2	-0.2	0.141025
		1899-12-31 21:55:34	3.84	-13.85	-0.06	2.86	-0.07	0.13	10.31	0.15	22.42	14.31	18.52	-3.1	-0.1	0.136827
		1899-12-31 21:55:34	3.84	-13.57	-0.06	2.88	-0.06	0.13	10.35	0.15	22.7	14.03	18.25	-3	-1.00613e-11	0.113867					10.35	14.03
		1899-12-31 21:55:34	3.83	-13.28	-0.07	2.89	-0.06	0.13	10.4	0.15	22.99	13.74	17.97	-2.9	0.1	0.138024
		1899-12-31 21:55:34	3.82	-12.99	-0.08	2.9	-0.06	0.13	10.45	0.14	23.28	13.45	17.7	-2.8	0.2	0.138689
		1899-12-31 21:55:34	3.81	-12.7	-0.08	2.91	-0.05	0.13	10.5	0.14	23.57	13.16	17.43	-2.7	0.3	0.139355
		1899-12-31 21:55:34	3.81	-12.41	-0.09	2.93	-0.05	0.12	10.54	0.13	23.86	12.87	17.16	-2.6	0.4	0.111963
		1899-12-31 21:55:34	3.8	-12.11	-0.09	2.94	-0.04	0.11	10.59	0.12	24.16	12.57	16.89	-2.5	0.5	0.135867
		1899-12-31 21:55:34	3.79	-11.82	-0.1	2.95	-0.03	0.1	10.62	0.1	24.45	12.28	16.62	-2.4	0.6	0.0846504
		1899-12-31 21:55:34	3.78	-11.52	-0.1	2.96	-0.03	0.08	10.66	0.09	24.75	11.98	16.35	-2.3	0.7	0.109465
		1899-12-31 21:55:35	3.77	-11.23	-0.1	2.97	-0.02	0.06	10.69	0.06	25.04	11.69	16.08	-2.2	0.8	0.0852091
		1899-12-31 21:55:35	3.76	-10.93	-0.1	2.97	-0.01	0.04	10.71	0.04	25.34	11.39	15.81	-2.1	0.9	0.0550412
		1899-12-31 21:55:35	3.75	-10.63	-0.1	2.97	0	0.01	10.72	0.01	25.64	11.09	15.54	-2	1	0.0275592
		1899-12-31 21:55:35	3.74	-10.33	-0.1	2.97	0	-0.02	10.72	0.02	25.94	10.79	15.27	-1.9	1.1	0
		1899-12-31 21:55:35	3.73	-10.04	-0.1	2.97	0.01	-0.06	10.7	0.06	26.23	10.5	14.99	-1.8	1.2	-0.0569923
		1899-12-31 21:55:35	3.72	-9.74	-0.1	2.96	0.02	-0.09	10.68	0.09	26.53	10.2	14.72	-1.7	1.3	-0.0549897
		1899-12-31 21:55:35	3.71	-9.44	-0.1	2.95	0.02	-0.13	10.64	0.13	26.83	9.9	14.45	-1.6	1.4	-0.109671
		1899-12-31 21:55:35	3.7	-9.15	-0.1	2.94	0.03	-0.17	10.59	0.17	27.12	9.61	14.18	-1.5	1.5	-0.141217
		1899-12-31 21:55:35	3.69	-8.86	-0.1	2.92	0.03	-0.21	10.52	0.21	27.41	9.32	13.9	-1.4	1.6	-0.196586
		1899-12-31 21:55:35	3.68	-8.57	-0.09	2.9	0.03	-0.24	10.44	0.25	27.71	9.02	13.63	-1.3	1.7	-0.215638
		1899-12-31 21:55:36	3.67	-8.28	-0.09	2.87	0.04	-0.28	10.35	0.28	27.99	8.74	13.35	-1.2	1.8	-0.257813
		1899-12-31 21:55:36	3.66	-7.99	-0.09	2.84	0.04	-0.31	10.25	0.31	28.28	8.45	13.08	-1.1	1.9	-0.274053
		1899-12-31 21:55:36	3.65	-7.71	-0.08	2.81	0.05	-0.33	10.13	0.34	28.56	8.17	12.8	-1	2	-0.336971
		1899-12-31 21:55:36	3.64	-7.43	-0.08	2.78	0.05	-0.35	10.01	0.36	28.84	7.89	12.53	-0.9	2.1	-0.333003
		1899-12-31 21:55:36	3.64	-7.15	-0.07	2.74	0.05	-0.37	9.88	0.37	29.12	7.61	12.25	-0.8	2.2	-0.356275
		1899-12-31 21:55:36	3.63	-6.88	-0.07	2.71	0.06	-0.37	9.75	0.38	29.39	7.34	11.97	-0.7	2.3	-0.36464
		1899-12-31 21:55:36	3.62	-6.61	-0.06	2.67	0.06	-0.37	9.61	0.38	29.66	7.07	11.7	-0.6	2.4	-0.387289
		1899-12-31 21:55:36	3.62	-6.35	-0.05	2.63	0.06	-0.36	9.48	0.37	29.93	6.8	11.42	-0.5	2.5	-0.35461
		1899-12-31 21:55:36	3.61	-6.08	-0.05	2.6	0.06	-0.35	9.35	0.35	30.19	6.54	11.14	-0.4	2.6	-0.363233
		1899-12-31 21:55:36	3.61	-5.83	-0.04	2.56	0.06	-0.33	9.22	0.33	30.45	6.28	10.86	-0.3	2.7	-0.358218
		1899-12-31 21:55:37	3.6	-5.57	-0.04	2.53	0.06	-0.3	9.11	0.31	30.7	6.03	10.59	-0.2	2.8	-0.311157
		1899-12-31 21:55:37	3.6	-5.32	-0.03	2.5	0.05	-0.27	9	0.27	30.95	5.78	10.31	-0.1	2.9	-0.307423
		1899-12-31 21:55:37	3.6	-5.07	-0.03	2.48	0.05	-0.23	8.91	0.24	31.2	5.53	10.03	0	3	-0.24875							8.91	5.53
		1899-12-31 21:55:37	3.59	-4.83	-0.02	2.45	0.05	-0.19	8.83	0.2	31.45	5.28	9.75	0.1	3.1	-0.219012
		1899-12-31 21:55:37	3.59	-4.58	-0.02	2.44	0.04	-0.15	8.77	0.15	31.69	5.04	9.48	0.2	3.2	-0.169753
		1899-12-31 21:55:37	3.59	-4.34	-0.01	2.42	0.04	-0.1	8.72	0.11	31.93	4.8	9.2	0.3	3.3	-0.140577
		1899-12-31 21:55:37	3.59	-4.1	-0.01	2.41	0.04	-0.06	8.69	0.07	32.18	4.55	8.92	0.4	3.4	-0.0806019
		1899-12-31 21:55:37	3.59	-3.85	-0.01	2.41	0.03	-0.01	8.68	0.03	32.42	4.31	8.65	0.5	3.5	-0.0279225
		1899-12-31 21:55:37	3.59	-3.61	0	2.41	0.03	0.03	8.68	0.05	32.66	4.07	8.37	0.6	3.6	0
		1899-12-31 21:55:37	3.59	-3.37	0	2.42	0.03	0.08	8.7	0.08	32.9	3.83	8.1	0.7	3.7	0.0558771
		1899-12-31 21:55:38	3.59	-3.13	0	2.42	0.03	0.11	8.73	0.12	33.14	3.59	7.82	0.8	3.8	0.0840567
		1899-12-31 21:55:38	3.59	-2.89	0.01	2.44	0.03	0.15	8.77	0.15	33.39	3.34	7.55	0.9	3.9	0.108025
		1899-12-31 21:55:38	3.59	-2.64	0.01	2.45	0.03	0.18	8.83	0.18	33.63	3.1	7.28	1	4	0.169753
		1899-12-31 21:55:38	3.59	-2.4	0.01	2.47	0.03	0.2	8.9	0.2	33.88	2.85	7	1.1	4.1	0.191528
		1899-12-31 21:55:38	3.59	-2.15	0.01	2.49	0.03	0.22	8.97	0.22	34.12	2.61	6.73	1.2	4.2	0.201083
		1899-12-31 21:55:38	3.59	-1.9	0.02	2.51	0.03	0.23	9.05	0.24	34.37	2.36	6.46	1.3	4.3	0.222469
		1899-12-31 21:55:38	3.6	-1.65	0.02	2.54	0.03	0.24	9.14	0.24	34.63	2.1	6.19	1.4	4.4	0.242922
		1899-12-31 21:55:38	3.6	-1.39	0.02	2.56	0.04	0.24	9.22	0.24	34.88	1.85	5.91	1.5	4.5	0.226667
		1899-12-31 21:55:38	3.6	-1.13	0.03	2.59	0.04	0.23	9.31	0.23	35.14	1.59	5.64	1.6	4.6	0.247463
		1899-12-31 21:55:38	3.6	-0.87	0.03	2.61	0.04	0.22	9.39	0.22	35.4	1.33	5.37	1.7	4.7	0.221985
		1899-12-31 21:55:39	3.61	-0.61	0.04	2.63	0.05	0.21	9.47	0.21	35.66	1.07	5.1	1.8	4.8	0.223884
		1899-12-31 21:55:39	3.61	-0.35	0.04	2.65	0.05	0.19	9.54	0.2	35.93	0.8	4.83	1.9	4.9	0.190143
		1899-12-31 21:55:39	3.62	-0.08	0.05	2.67	0.06	0.17	9.61	0.18	36.19	0.54	4.56	2	5	0.198911
		1899-12-31 21:55:39	3.62	0.19	0.05	2.68	0.06	0.15	9.67	0.16	36.46	0.27	4.29	2.1	5.1	0.165295
		1899-12-31 21:55:39	3.63	0.46	0.06	2.7	0.07	0.12	9.72	0.14	36.73	0	4.02	2.2	5.2	0.138532
		1899-12-31 21:55:39	3.63	0.73	0.06	2.71	0.07	0.1	9.76	0.12	37	-0.27	3.76	2.3	5.3	0.11134
		1899-12-31 21:55:39	3.64	1	0.07	2.72	0.08	0.08	9.8	0.11	37.27	-0.54	3.49	2.4	5.4	0.111797
		1899-12-31 21:55:39	3.65	1.27	0.08	2.73	0.08	0.06	9.82	0.1	37.54	-0.81	3.22	2.5	5.5	0.05607
		1899-12-31 21:55:39	3.65	1.54	0.09	2.73	0.08	0.04	9.84	0.09	37.82	-1.09	2.95	2.6	5.6	0.0541777
		1899-12-31 21:55:39	3.66	1.82	0.1	2.74	0.09	0.02	9.85	0.09	38.09	-1.36	2.68	2.7	5.7	0.028135
		1899-12-31 21:55:40	3.67	2.09	0.1	2.74	0.09	0.01	9.86	0.09	38.36	-1.63	2.41	2.8	5.8	0.0281636
		1899-12-31 21:55:40	3.68	2.36	0.11	2.74	0.09	-0.01	9.86	0.09	38.64	-1.91	2.14	2.9	5.9	0
		1899-12-31 21:55:40	3.7	2.64	0.12	2.74	0.09	-0.02	9.86	0.09	38.91	-2.18	1.88	3	6	0
		1899-12-31 21:55:40	3.71	2.91	0.13	2.73	0.09	-0.03	9.85	0.1	39.19	-2.46	1.61	3.1	6.1	-0.0271577
		1899-12-31 21:55:40	3.72	3.18	0.14	2.73	0.09	-0.04	9.84	0.1	39.46	-2.73	1.34	3.2	6.2	-0.028135
		1899-12-31 21:55:40	3.74	3.46	0.15	2.73	0.1	-0.04	9.83	0.1	39.73	-3	1.07	3.3	6.3	-0.0281064
		1899-12-31 21:55:40	3.75	3.73	0.16	2.72	0.1	-0.04	9.82	0.1	40	-3.27	0.8	3.4	6.4	-0.0280778
		1899-12-31 21:55:40	3.77	4	0.17	2.72	0.1	-0.04	9.81	0.1	40.28	-3.55	0.54	3.5	6.5	-0.0270475
		1899-12-31 21:55:40	3.79	4.27	0.18	2.71	0.1	-0.04	9.79	0.11	40.55	-3.82	0.27	3.6	6.6	-0.0560128
		1899-12-31 21:55:40	3.81	4.54	0.19	2.71	0.1	-0.04	9.78	0.11	40.82	-4.09	0	3.7	6.7	-0.0279635
14	1899-12-31 22:09:39	GlobalTime	X[m]	Y[m]	Vx[m/s]	Vy[m/s]	Ax[m/s2]	Ay[m/s2]	Speed[km/h]	Acceleration[m/s2]	Space[m]				3
		1899-12-31 22:09:37	2.63	-36.16	0.3	6.77	-0.06	0.05	24.38	0.08	0	36.5	53.27	-2.27	0.73						24.38	36.5
		1899-12-31 22:09:37	2.66	-35.48	0.3	6.77	-0.08	0.06	24.4	0.1	0.68	35.82	52.55	-2.17	0.83	0.0553513
		1899-12-31 22:09:37	2.69	-34.8	0.29	6.78	-0.1	0.08	24.42	0.13	1.36	35.14	51.85	-2.07	0.93	0.0553967
		1899-12-31 22:09:37	2.71	-34.12	0.28	6.79	-0.12	0.09	24.45	0.15	2.03	34.47	51.15	-1.97	1.03	0.0844216
		1899-12-31 22:09:37	2.74	-33.44	0.26	6.8	-0.14	0.1	24.48	0.17	2.71	33.79	50.46	-1.87	1.13	0.0832823
		1899-12-31 22:09:37	2.77	-32.76	0.25	6.81	-0.16	0.12	24.52	0.19	3.39	33.11	49.79	-1.77	1.23	0.111202
		1899-12-31 22:09:37	2.79	-32.08	0.23	6.82	-0.17	0.12	24.56	0.21	4.08	32.42	49.12	-1.67	1.33	0.109769
		1899-12-31 22:09:38	2.81	-31.4	0.22	6.83	-0.19	0.13	24.6	0.23	4.76	31.74	48.46	-1.57	1.43	0.111565
		1899-12-31 22:09:38	2.83	-30.72	0.2	6.84	-0.2	0.14	24.65	0.24	5.44	31.06	47.81	-1.47	1.53	0.139712
		1899-12-31 22:09:38	2.85	-30.03	0.18	6.86	-0.21	0.14	24.7	0.26	6.13	30.37	47.18	-1.37	1.63	0.137966
		1899-12-31 22:09:38	2.87	-29.35	0.15	6.87	-0.22	0.14	24.75	0.27	6.82	29.68	46.55	-1.27	1.73	0.138246
		1899-12-31 22:09:38	2.88	-28.66	0.13	6.89	-0.23	0.14	24.8	0.27	7.5	29	45.93	-1.17	1.83	0.140563
		1899-12-31 22:09:38	2.89	-27.97	0.11	6.9	-0.24	0.13	24.84	0.28	8.19	28.31	45.32	-1.07	1.93	0.111022
		1899-12-31 22:09:38	2.9	-27.28	0.08	6.91	-0.25	0.13	24.89	0.28	8.88	27.62	44.72	-0.97	2.03	0.139029
		1899-12-31 22:09:38	2.91	-26.59	0.06	6.93	-0.25	0.12	24.93	0.28	9.58	26.92	44.13	-0.87	2.13	0.109832
		1899-12-31 22:09:38	2.92	-25.89	0.03	6.94	-0.25	0.1	24.97	0.27	10.27	26.23	43.55	-0.77	2.23	0.111603
		1899-12-31 22:09:38	2.92	-25.2	0.01	6.95	-0.25	0.09	25.01	0.27	10.96	25.54	42.98	-0.67	2.33	0.111782
		1899-12-31 22:09:39	2.92	-24.5	-0.02	6.96	-0.25	0.07	25.04	0.26	11.66	24.84	42.41	-0.57	2.43	0.0827546
		1899-12-31 22:09:39	2.91	-23.81	-0.04	6.96	-0.24	0.05	25.06	0.25	12.35	24.15	41.85	-0.47	2.53	0.0560252
		1899-12-31 22:09:39	2.91	-23.11	-0.07	6.97	-0.23	0.03	25.08	0.24	13.05	23.45	41.3	-0.37	2.63	0.055269
		1899-12-31 22:09:39	2.9	-22.41	-0.09	6.97	-0.22	0.01	25.09	0.22	13.75	22.75	40.76	-0.27	2.73	0.027651
		1899-12-31 22:09:39	2.89	-21.72	-0.11	6.97	-0.21	-0.02	25.09	0.21	14.44	22.06	40.22	-0.17	2.83	0
		1899-12-31 22:09:39	2.88	-21.02	-0.13	6.97	-0.2	-0.04	25.09	0.2	15.14	21.36	39.68	-0.07	2.93	0
		1899-12-31 22:09:39	2.87	-20.32	-0.15	6.96	-0.18	-0.07	25.07	0.19	15.84	20.66	39.15	0.03	3.03	-0.055291							25.07	20.66
		1899-12-31 22:09:39	2.85	-19.63	-0.17	6.95	-0.16	-0.1	25.04	0.19	16.53	19.97	38.62	0.13	3.13	-0.0840546
		1899-12-31 22:09:39	2.83	-18.93	-0.18	6.94	-0.14	-0.14	25	0.2	17.23	19.27	38.09	0.23	3.23	-0.110317
		1899-12-31 22:09:39	2.81	-18.24	-0.2	6.93	-0.12	-0.17	24.95	0.21	17.92	18.58	37.56	0.33	3.33	-0.139644
		1899-12-31 22:09:40	2.79	-17.55	-0.21	6.91	-0.1	-0.21	24.89	0.23	18.61	17.89	37.03	0.43	3.43	-0.167203
		1899-12-31 22:09:40	2.77	-16.86	-0.22	6.89	-0.08	-0.24	24.81	0.26	19.3	17.2	36.5	0.53	3.53	-0.222312
		1899-12-31 22:09:40	2.75	-16.17	-0.23	6.86	-0.07	-0.28	24.72	0.29	19.99	16.51	35.97	0.63	3.63	-0.249245
		1899-12-31 22:09:40	2.73	-15.49	-0.23	6.83	-0.05	-0.32	24.61	0.32	20.68	15.82	35.44	0.73	3.73	-0.303403
		1899-12-31 22:09:40	2.7	-14.8	-0.24	6.8	-0.03	-0.36	24.49	0.36	21.36	15.14	34.9	0.83	3.83	-0.334286
		1899-12-31 22:09:40	2.68	-14.13	-0.24	6.76	-0.01	-0.4	24.36	0.4	22.04	14.46	34.35	0.93	3.93	-0.3603
		1899-12-31 22:09:40	2.66	-13.45	-0.24	6.72	0	-0.44	24.21	0.44	22.71	13.79	33.8	1.03	4.03	-0.419517
		1899-12-31 22:09:40	2.63	-12.78	-0.24	6.67	0.01	-0.48	24.04	0.48	23.38	13.12	33.24	1.13	4.13	-0.47232
		1899-12-31 22:09:40	2.61	-12.12	-0.24	6.63	0.02	-0.52	23.87	0.53	24.05	12.45	32.68	1.23	4.23	-0.468992
		1899-12-31 22:09:40	2.58	-11.46	-0.23	6.57	0.03	-0.56	23.67	0.57	24.71	11.79	32.11	1.33	4.33	-0.555789
		1899-12-31 22:09:41	2.56	-10.8	-0.23	6.51	0.03	-0.6	23.46	0.6	25.36	11.14	31.54	1.43	4.43	-0.587447
		1899-12-31 22:09:41	2.54	-10.15	-0.23	6.45	0.03	-0.64	23.24	0.64	26.01	10.49	30.95	1.53	4.53	-0.609805
		1899-12-31 22:09:41	2.52	-9.51	-0.22	6.39	0.03	-0.67	23.01	0.67	26.65	9.85	30.36	1.63	4.63	-0.641246
		1899-12-31 22:09:41	2.49	-8.88	-0.22	6.32	0.03	-0.7	22.76	0.7	27.29	9.21	29.76	1.73	4.73	-0.689773
		1899-12-31 22:09:41	2.47	-8.25	-0.22	6.25	0.02	-0.72	22.51	0.73	27.92	8.58	29.15	1.83	4.83	-0.693067
		1899-12-31 22:09:41	2.45	-7.63	-0.22	6.17	0.01	-0.74	22.24	0.74	28.54	7.96	28.54	1.93	4.93	-0.751848
		1899-12-31 22:09:41	2.43	-7.01	-0.22	6.1	0	-0.76	21.97	0.76	29.15	7.35	27.92	2.03	5.03	-0.754952
		1899-12-31 22:09:41	2.41	-6.41	-0.22	6.02	-0.01	-0.76	21.7	0.76	29.76	6.74	27.29	2.13	5.13	-0.745731
		1899-12-31 22:09:41	2.38	-5.81	-0.22	5.95	-0.02	-0.76	21.43	0.76	30.36	6.14	26.65	2.23	5.23	-0.748785
		1899-12-31 22:09:41	2.36	-5.22	-0.22	5.87	-0.04	-0.75	21.15	0.75	30.95	5.55	26.01	2.33	5.33	-0.779609
		1899-12-31 22:09:42	2.34	-4.63	-0.22	5.8	-0.05	-0.74	20.88	0.74	31.54	4.96	25.36	2.43	5.43	-0.742055
		1899-12-31 22:09:42	2.32	-4.06	-0.23	5.72	-0.07	-0.71	20.62	0.72	32.11	4.39	24.71	2.53	5.53	-0.730317
		1899-12-31 22:09:42	2.29	-3.49	-0.24	5.65	-0.09	-0.68	20.37	0.69	32.68	3.82	24.05	2.63	5.63	-0.693598
		1899-12-31 22:09:42	2.27	-2.93	-0.25	5.59	-0.1	-0.64	20.13	0.65	33.24	3.26	23.38	2.73	5.73	-0.669643
		1899-12-31 22:09:42	2.25	-2.37	-0.26	5.52	-0.12	-0.59	19.91	0.6	33.8	2.7	22.71	2.83	5.83	-0.606867
		1899-12-31 22:09:42	2.22	-1.82	-0.27	5.47	-0.13	-0.53	19.71	0.55	34.35	2.15	22.04	2.93	5.93	-0.555836
		1899-12-31 22:09:42	2.19	-1.28	-0.28	5.42	-0.15	-0.47	19.52	0.49	34.9	1.6	21.36	3.03	6.03	-0.522847
		1899-12-31 22:09:42	2.16	-0.74	-0.3	5.37	-0.16	-0.4	19.37	0.43	35.44	1.06	20.68	3.13	6.13	-0.416774
		1899-12-31 22:09:42	2.13	-0.2	-0.31	5.33	-0.17	-0.32	19.23	0.36	35.97	0.53	19.99	3.23	6.23	-0.393373
		1899-12-31 22:09:42	2.1	0.33	-0.33	5.3	-0.18	-0.24	19.13	0.3	36.5	0	19.3	3.33	6.33	-0.279234
		1899-12-31 22:09:43	2.07	0.86	-0.35	5.28	-0.18	-0.15	19.06	0.24	37.03	-0.53	18.61	3.43	6.43	-0.194597
		1899-12-31 22:09:43	2.03	1.38	-0.37	5.27	-0.19	-0.06	19.02	0.2	37.56	-1.06	17.92	3.53	6.53	-0.110878
		1899-12-31 22:09:43	1.99	1.91	-0.39	5.27	-0.19	0.04	19.02	0.2	38.09	-1.59	17.23	3.63	6.63	0
		1899-12-31 22:09:43	1.95	2.44	-0.41	5.28	-0.19	0.14	19.05	0.24	38.62	-2.12	16.53	3.73	6.73	0.0831368
		1899-12-31 22:09:43	1.91	2.97	-0.43	5.29	-0.19	0.23	19.11	0.3	39.15	-2.65	15.84	3.83	6.83	0.166667
		1899-12-31 22:09:43	1.87	3.5	-0.45	5.32	-0.19	0.33	19.22	0.38	39.68	-3.18	15.14	3.93	6.93	0.306917
		1899-12-31 22:09:43	1.82	4.03	-0.46	5.36	-0.19	0.43	19.35	0.47	40.22	-3.72	14.44	4.03	7.03	0.358232
		1899-12-31 22:09:43	1.77	4.57	-0.48	5.4	-0.18	0.52	19.52	0.55	40.76	-4.26	13.75	4.13	7.13	0.472101
		1899-12-31 22:09:43	1.73	5.11	-0.5	5.46	-0.18	0.6	19.73	0.63	41.3	-4.8	13.05	4.23	7.23	0.588885
		1899-12-31 22:09:43	1.67	5.66	-0.52	5.52	-0.17	0.68	19.96	0.7	41.85	-5.35	12.35	4.33	7.33	0.640341
		1899-12-31 22:09:44	1.62	6.22	-0.53	5.59	-0.16	0.74	20.21	0.76	42.41	-5.91	11.66	4.43	7.43	0.691861
		1899-12-31 22:09:44	1.57	6.78	-0.55	5.66	-0.14	0.79	20.49	0.81	42.98	-6.48	10.96	4.53	7.53	0.771334
		1899-12-31 22:09:44	1.51	7.35	-0.56	5.75	-0.13	0.84	20.78	0.85	43.55	-7.05	10.27	4.63	7.63	0.81007
		1899-12-31 22:09:44	1.45	7.93	-0.58	5.83	-0.12	0.87	21.09	0.88	44.13	-7.63	9.58	4.73	7.73	0.863379
		1899-12-31 22:09:44	1.4	8.52	-0.59	5.92	-0.1	0.9	21.41	0.91	44.72	-8.22	8.88	4.83	7.83	0.889307
		1899-12-31 22:09:44	1.34	9.11	-0.6	6.01	-0.09	0.93	21.74	0.93	45.32	-8.82	8.19	4.93	7.93	0.915606
		1899-12-31 22:09:44	1.28	9.72	-0.61	6.1	-0.08	0.95	22.08	0.95	45.93	-9.43	7.5	5.03	8.03	0.942294
		1899-12-31 22:09:44	1.22	10.33	-0.61	6.2	-0.07	0.96	22.43	0.96	46.55	-10.05	6.82	5.13	8.13	0.969391
		1899-12-31 22:09:44	1.15	10.96	-0.62	6.3	-0.06	0.97	22.77	0.97	47.18	-10.68	6.13	5.23	8.23	0.941113
		1899-12-31 22:09:44	1.09	11.59	-0.62	6.39	-0.05	0.98	23.13	0.98	47.81	-11.31	5.44	5.33	8.33	1.0119
		1899-12-31 22:09:45	1.03	12.24	-0.63	6.49	-0.04	0.99	23.48	0.99	48.46	-11.96	4.76	5.43	8.43	0.968275
		1899-12-31 22:09:45	0.97	12.89	-0.63	6.59	-0.03	0.99	23.84	0.99	49.12	-12.62	4.08	5.53	8.53	0.995791
		1899-12-31 22:09:45	0.9	13.55	-0.64	6.69	-0.03	0.99	24.19	0.99	49.79	-13.29	3.39	5.63	8.63	0.96799
		1899-12-31 22:09:45	0.84	14.23	-0.64	6.79	-0.03	1	24.55	1	50.46	-13.96	2.71	5.73	8.73	1.01036
		1899-12-31 22:09:45	0.78	14.91	-0.64	6.89	-0.02	1	24.91	1	51.15	-14.65	2.03	5.83	8.83	0.995572
		1899-12-31 22:09:45	0.71	15.61	-0.64	6.99	-0.02	1	25.27	1	51.85	-15.35	1.36	5.93	8.93	0.995635
		1899-12-31 22:09:45	0.65	16.31	-0.65	7.09	-0.02	1	25.62	1	52.55	-16.05	0.68	6.03	9.03	0.981674
		1899-12-31 22:09:45	0.58	17.02	-0.65	7.19	-0.02	1	25.98	1	53.27	-16.77	0	6.13	9.13	0.99537
15	1899-12-31 22:13:17	GlobalTime	X[m]	Y[m]	Vx[m/s]	Vy[m/s]	Ax[m/s2]	Ay[m/s2]	Speed[km/h]	Acceleration[m/s2]	Space[m]				3
		1899-12-31 22:13:13	1.33	-36.4	0.13	5.53	0.04	0.05	19.93	0.06	0	36.92	41.28	-4.3	-1.3
		1899-12-31 22:13:13	1.34	-35.84	0.14	5.54	0.05	0.07	19.95	0.08	0.55	36.37	40.74	-4.2	-1.2	0.0559484
		1899-12-31 22:13:13	1.36	-35.29	0.14	5.55	0.06	0.08	19.98	0.1	1.11	35.81	40.2	-4.1	-1.1	0.0825273
		1899-12-31 22:13:13	1.37	-34.73	0.15	5.56	0.07	0.09	20.01	0.12	1.66	35.26	39.66	-4	-1	0.084154
		1899-12-31 22:13:13	1.39	-34.18	0.16	5.57	0.08	0.11	20.05	0.13	2.22	34.7	39.12	-3.9	-0.9	0.110395
		1899-12-31 22:13:13	1.4	-33.62	0.16	5.58	0.09	0.12	20.09	0.15	2.78	34.14	38.57	-3.8	-0.8	0.110615
		1899-12-31 22:13:13	1.42	-33.06	0.17	5.59	0.1	0.13	20.13	0.16	3.34	33.58	38.02	-3.7	-0.7	0.110836
		1899-12-31 22:13:13	1.44	-32.5	0.18	5.6	0.1	0.13	20.18	0.17	3.9	33.02	37.47	-3.6	-0.6	0.138854
		1899-12-31 22:13:14	1.46	-31.94	0.19	5.62	0.11	0.14	20.23	0.18	4.46	32.46	36.92	-3.5	-0.5	0.139199
		1899-12-31 22:13:14	1.48	-31.38	0.2	5.63	0.12	0.14	20.28	0.18	5.02	31.9	36.36	-3.4	-0.4	0.139543
		1899-12-31 22:13:14	1.5	-30.82	0.22	5.64	0.12	0.14	20.34	0.19	5.58	31.34	35.8	-3.3	-0.3	0.167907
		1899-12-31 22:13:14	1.52	-30.25	0.23	5.66	0.12	0.14	20.39	0.19	6.15	30.77	35.24	-3.2	-0.2	0.13784
		1899-12-31 22:13:14	1.54	-29.68	0.24	5.67	0.13	0.14	20.44	0.19	6.72	30.2	34.68	-3.1	-0.1	0.138178
		1899-12-31 22:13:14	1.57	-29.12	0.25	5.69	0.13	0.14	20.5	0.19	7.29	29.63	34.11	-3	9.12337e-12	0.166261					20.5	7.29
		1899-12-31 22:13:14	1.59	-28.55	0.27	5.7	0.13	0.14	20.55	0.19	7.86	29.06	33.55	-2.9	0.1	0.138923
		1899-12-31 22:13:14	1.62	-27.98	0.28	5.72	0.13	0.13	20.6	0.19	8.43	28.49	32.98	-2.8	0.2	0.139261
		1899-12-31 22:13:14	1.65	-27.4	0.29	5.73	0.13	0.13	20.65	0.18	9	27.92	32.4	-2.7	0.3	0.1396
		1899-12-31 22:13:14	1.68	-26.83	0.3	5.74	0.12	0.13	20.7	0.18	9.57	27.35	31.83	-2.6	0.4	0.139938
		1899-12-31 22:13:15	1.71	-26.25	0.32	5.75	0.12	0.12	20.75	0.17	10.15	26.77	31.25	-2.5	0.5	0.137858
		1899-12-31 22:13:15	1.74	-25.68	0.33	5.77	0.12	0.11	20.79	0.16	10.73	26.19	30.68	-2.4	0.6	0.110526
		1899-12-31 22:13:15	1.78	-25.1	0.34	5.78	0.11	0.11	20.83	0.16	11.3	25.62	30.1	-2.3	0.7	0.112681
		1899-12-31 22:13:15	1.81	-24.52	0.35	5.79	0.11	0.1	20.87	0.15	11.88	25.04	29.51	-2.2	0.8	0.110951
		1899-12-31 22:13:15	1.85	-23.94	0.36	5.8	0.1	0.1	20.91	0.14	12.46	24.46	28.93	-2.1	0.9	0.111164
		1899-12-31 22:13:15	1.88	-23.36	0.37	5.81	0.09	0.09	20.95	0.13	13.05	23.87	28.35	-2	1	0.109489
		1899-12-31 22:13:15	1.92	-22.78	0.38	5.82	0.09	0.09	20.99	0.12	13.63	23.29	27.76	-1.9	1.1	0.11159
		1899-12-31 22:13:15	1.96	-22.2	0.39	5.83	0.08	0.09	21.02	0.12	14.21	22.71	27.17	-1.8	1.2	0.0838322
		1899-12-31 22:13:15	2	-21.62	0.4	5.83	0.07	0.08	21.05	0.11	14.8	22.12	26.59	-1.7	1.3	0.082529
		1899-12-31 22:13:15	2.04	-21.03	0.4	5.84	0.06	0.08	21.08	0.1	15.38	21.54	26	-1.6	1.4	0.0840717
		1899-12-31 22:13:16	2.08	-20.45	0.41	5.85	0.05	0.08	21.11	0.09	15.97	20.95	25.41	-1.5	1.5	0.0827644
		1899-12-31 22:13:16	2.12	-19.86	0.41	5.86	0.04	0.07	21.14	0.08	16.55	20.37	24.82	-1.4	1.6	0.0843111
		1899-12-31 22:13:16	2.16	-19.28	0.42	5.87	0.03	0.07	21.17	0.08	17.14	19.78	24.23	-1.3	1.7	0.0829998
		1899-12-31 22:13:16	2.21	-18.69	0.42	5.87	0.02	0.06	21.19	0.07	17.73	19.19	23.64	-1.2	1.8	0.0553986
		1899-12-31 22:13:16	2.25	-18.1	0.42	5.88	0.01	0.06	21.21	0.06	18.32	18.6	23.05	-1.1	1.9	0.0554509
		1899-12-31 22:13:16	2.29	-17.51	0.42	5.88	0	0.05	21.24	0.05	18.91	18.01	22.45	-1	2	0.0832745
		1899-12-31 22:13:16	2.33	-16.93	0.42	5.89	-0.01	0.04	21.25	0.05	19.5	17.42	21.86	-0.9	2.1	0.0277843
		1899-12-31 22:13:16	2.37	-16.34	0.42	5.89	-0.02	0.04	21.27	0.04	20.09	16.83	21.27	-0.8	2.2	0.0556079
		1899-12-31 22:13:16	2.42	-15.75	0.42	5.9	-0.04	0.03	21.28	0.05	20.68	16.24	20.68	-0.7	2.3	0.0278236
		1899-12-31 22:13:16	2.46	-15.16	0.41	5.9	-0.05	0.02	21.29	0.05	21.27	15.65	20.09	-0.6	2.4	0.0278366
		1899-12-31 22:13:17	2.5	-14.57	0.41	5.9	-0.06	0.01	21.29	0.06	21.86	15.06	19.5	-0.5	2.5	0
		1899-12-31 22:13:17	2.54	-13.98	0.4	5.9	-0.08	0	21.29	0.08	22.45	14.47	18.91	-0.4	2.6	0
		1899-12-31 22:13:17	2.58	-13.39	0.39	5.9	-0.09	-0.01	21.29	0.09	23.05	13.87	18.32	-0.3	2.7	0
		1899-12-31 22:13:17	2.62	-12.8	0.38	5.9	-0.11	-0.02	21.28	0.11	23.64	13.28	17.73	-0.2	2.8	-0.0278366
		1899-12-31 22:13:17	2.66	-12.21	0.37	5.9	-0.12	-0.03	21.27	0.13	24.23	12.69	17.14	-0.1	2.9	-0.0278236
		1899-12-31 22:13:17	2.69	-11.62	0.36	5.89	-0.13	-0.05	21.25	0.14	24.82	12.1	16.55	0	3	-0.0556079							21.25	12.1
		1899-12-31 22:13:17	2.73	-11.03	0.35	5.89	-0.15	-0.06	21.23	0.16	25.41	11.51	15.97	0.1	3.1	-0.0555556
		1899-12-31 22:13:17	2.76	-10.44	0.33	5.88	-0.16	-0.07	21.2	0.18	26	10.92	15.38	0.2	3.2	-0.0832352
		1899-12-31 22:13:17	2.8	-9.85	0.31	5.87	-0.18	-0.08	21.18	0.19	26.59	10.33	14.8	0.3	3.3	-0.0554248
		1899-12-31 22:13:17	2.83	-9.27	0.3	5.87	-0.19	-0.09	21.14	0.21	27.17	9.75	14.21	0.4	3.4	-0.112601
		1899-12-31 22:13:18	2.85	-8.68	0.28	5.86	-0.2	-0.11	21.1	0.23	27.76	9.16	13.63	0.5	3.5	-0.110483
		1899-12-31 22:13:18	2.88	-8.1	0.26	5.84	-0.22	-0.12	21.06	0.25	28.35	8.57	13.05	0.6	3.6	-0.110274
		1899-12-31 22:13:18	2.91	-7.51	0.23	5.83	-0.23	-0.13	21.01	0.26	28.93	7.99	12.46	0.7	3.7	-0.13992
		1899-12-31 22:13:18	2.93	-6.93	0.21	5.82	-0.24	-0.14	20.96	0.28	29.51	7.41	11.88	0.8	3.8	-0.139587
		1899-12-31 22:13:18	2.95	-6.35	0.19	5.8	-0.25	-0.16	20.91	0.3	30.1	6.82	11.3	0.9	3.9	-0.136894
		1899-12-31 22:13:18	2.97	-5.77	0.16	5.79	-0.26	-0.17	20.85	0.31	30.68	6.24	10.73	1	4	-0.166667
		1899-12-31 22:13:18	2.98	-5.19	0.13	5.77	-0.27	-0.18	20.78	0.33	31.25	5.67	10.15	1.1	4.1	-0.19724
		1899-12-31 22:13:18	2.99	-4.61	0.11	5.75	-0.28	-0.19	20.71	0.34	31.83	5.09	9.57	1.2	4.2	-0.193187
		1899-12-31 22:13:18	3	-4.04	0.08	5.73	-0.3	-0.2	20.64	0.36	32.4	4.52	9	1.3	4.3	-0.195913
		1899-12-31 22:13:18	3.01	-3.47	0.05	5.71	-0.31	-0.22	20.56	0.37	32.98	3.94	8.43	1.4	4.4	-0.219242
		1899-12-31 22:13:19	3.01	-2.9	0.02	5.69	-0.32	-0.23	20.48	0.39	33.55	3.37	7.86	1.5	4.5	-0.222222
		1899-12-31 22:13:19	3.01	-2.33	-0.01	5.67	-0.32	-0.23	20.4	0.4	34.11	2.81	7.29	1.6	4.6	-0.225309
		1899-12-31 22:13:19	3.01	-1.76	-0.05	5.64	-0.33	-0.24	20.32	0.41	34.68	2.24	6.72	1.7	4.7	-0.220489
		1899-12-31 22:13:19	3	-1.2	-0.08	5.62	-0.34	-0.25	20.23	0.42	35.24	1.68	6.15	1.8	4.8	-0.251426
		1899-12-31 22:13:19	2.99	-0.64	-0.12	5.59	-0.35	-0.25	20.14	0.43	35.8	1.12	5.58	1.9	4.9	-0.25031
		1899-12-31 22:13:19	2.98	-0.08	-0.15	5.57	-0.36	-0.26	20.05	0.44	36.36	0.56	5.02	2	5	-0.249194
		1899-12-31 22:13:19	2.96	0.47	-0.19	5.54	-0.36	-0.26	19.96	0.45	36.92	0	4.46	2.1	5.1	-0.248078
		1899-12-31 22:13:19	2.94	1.03	-0.22	5.52	-0.37	-0.26	19.88	0.45	37.47	-0.55	3.9	2.2	5.2	-0.223569
		1899-12-31 22:13:19	2.92	1.58	-0.26	5.49	-0.37	-0.26	19.79	0.45	38.02	-1.1	3.34	2.3	5.3	-0.250442
		1899-12-31 22:13:19	2.89	2.12	-0.3	5.46	-0.37	-0.26	19.7	0.46	38.57	-1.65	2.78	2.4	5.4	-0.249306
		1899-12-31 22:13:20	2.86	2.67	-0.33	5.44	-0.38	-0.26	19.61	0.46	39.12	-2.2	2.22	2.5	5.5	-0.248169
		1899-12-31 22:13:20	2.82	3.21	-0.37	5.41	-0.38	-0.26	19.53	0.46	39.66	-2.74	1.66	2.6	5.6	-0.223708
		1899-12-31 22:13:20	2.78	3.75	-0.41	5.39	-0.38	-0.26	19.44	0.46	40.2	-3.28	1.11	2.7	5.7	-0.250579
		1899-12-31 22:13:20	2.74	4.29	-0.45	5.36	-0.38	-0.26	19.36	0.46	40.74	-3.82	0.55	2.8	5.8	-0.221765
		1899-12-31 22:13:20	2.69	4.82	-0.49	5.33	-0.38	-0.26	19.28	0.46	41.28	-4.36	0	2.9	5.9	-0.22085
16	1899-12-31 22:16:51	GlobalTime	X[m]	Y[m]	Vx[m/s]	Vy[m/s]	Ax[m/s2]	Ay[m/s2]	Speed[km/h]	Acceleration[m/s2]	Space[m]				3
		1899-12-31 22:16:46	1.55	-36.33	0.54	5.89	-0.05	0.04	21.29	0.06	0	36.86	40.96	-4.8	-1.8
		1899-12-31 22:16:47	1.6	-35.74	0.53	5.89	-0.06	0.05	21.3	0.08	0.59	36.27	40.27	-4.7	-1.7	0.0278497
		1899-12-31 22:16:47	1.66	-35.15	0.53	5.9	-0.08	0.06	21.32	0.1	1.18	35.68	39.57	-4.6	-1.6	0.0557386
		1899-12-31 22:16:47	1.71	-34.56	0.52	5.91	-0.09	0.07	21.34	0.12	1.78	35.08	38.89	-4.5	-1.5	0.0548611
		1899-12-31 22:16:47	1.76	-33.97	0.51	5.91	-0.11	0.08	21.36	0.13	2.37	34.49	38.21	-4.4	-1.4	0.0558433
		1899-12-31 22:16:47	1.81	-33.38	0.5	5.92	-0.12	0.09	21.39	0.15	2.96	33.9	37.53	-4.3	-1.3	0.083863
		1899-12-31 22:16:47	1.86	-32.78	0.49	5.93	-0.13	0.1	21.42	0.16	3.56	33.3	36.86	-4.2	-1.2	0.082581
		1899-12-31 22:16:47	1.91	-32.19	0.47	5.94	-0.14	0.1	21.45	0.18	4.15	32.71	36.19	-4.1	-1.1	0.0840984
		1899-12-31 22:16:47	1.96	-31.6	0.46	5.95	-0.15	0.11	21.48	0.19	4.75	32.11	35.53	-4	-1	0.0828125
		1899-12-31 22:16:47	2	-31	0.44	5.96	-0.16	0.11	21.52	0.2	5.35	31.51	34.87	-3.9	-0.9	0.110597
		1899-12-31 22:16:47	2.04	-30.4	0.43	5.97	-0.17	0.11	21.56	0.21	5.94	30.92	34.21	-3.8	-0.8	0.11268
		1899-12-31 22:16:48	2.09	-29.81	0.41	5.98	-0.18	0.12	21.59	0.21	6.54	30.32	33.57	-3.7	-0.7	0.0832369
		1899-12-31 22:16:48	2.13	-29.21	0.39	6	-0.18	0.11	21.63	0.22	7.14	29.72	32.92	-3.6	-0.6	0.111163
		1899-12-31 22:16:48	2.16	-28.61	0.37	6.01	-0.19	0.11	21.67	0.22	7.75	29.11	32.28	-3.5	-0.5	0.109543
		1899-12-31 22:16:48	2.2	-28.01	0.35	6.02	-0.19	0.11	21.7	0.22	8.35	28.51	31.64	-3.4	-0.4	0.0836613
		1899-12-31 22:16:48	2.23	-27.4	0.33	6.03	-0.19	0.11	21.74	0.22	8.95	27.91	31.01	-3.3	-0.3	0.111728
		1899-12-31 22:16:48	2.27	-26.8	0.31	6.04	-0.19	0.1	21.77	0.22	9.56	27.3	30.38	-3.2	-0.2	0.0825554
		1899-12-31 22:16:48	2.3	-26.2	0.3	6.05	-0.19	0.09	21.8	0.21	10.16	26.7	29.75	-3.1	-0.1	0.0840471
		1899-12-31 22:16:48	2.33	-25.59	0.28	6.06	-0.19	0.09	21.83	0.21	10.77	26.09	29.13	-3	9.12337e-12	0.0827831					21.83	26.09
		1899-12-31 22:16:48	2.35	-24.98	0.26	6.07	-0.19	0.08	21.86	0.2	11.37	25.49	28.51	-2.9	0.1	0.0842785
		1899-12-31 22:16:48	2.38	-24.38	0.24	6.07	-0.18	0.07	21.88	0.2	11.98	24.88	27.88	-2.8	0.2	0.0553279
		1899-12-31 22:16:49	2.4	-23.77	0.22	6.08	-0.18	0.06	21.91	0.19	12.59	24.27	27.27	-2.7	0.3	0.0830867
		1899-12-31 22:16:49	2.42	-23.16	0.2	6.09	-0.17	0.05	21.92	0.18	13.2	23.66	26.65	-2.6	0.4	0.0277209
		1899-12-31 22:16:49	2.44	-22.55	0.19	6.09	-0.17	0.04	21.94	0.17	13.81	23.05	26.03	-2.5	0.5	0.0554797
		1899-12-31 22:16:49	2.46	-21.94	0.17	6.1	-0.16	0.04	21.95	0.17	14.42	22.44	25.42	-2.4	0.6	0.0277588
		1899-12-31 22:16:49	2.48	-21.33	0.15	6.1	-0.16	0.03	21.96	0.16	15.03	21.83	24.8	-2.3	0.7	0.0277715
		1899-12-31 22:16:49	2.49	-20.72	0.14	6.1	-0.15	0.02	21.97	0.15	15.64	21.22	24.19	-2.2	0.8	0.0277841
		1899-12-31 22:16:49	2.5	-20.11	0.12	6.1	-0.15	0.01	21.98	0.15	16.25	20.61	23.58	-2.1	0.9	0.0277968
		1899-12-31 22:16:49	2.51	-19.5	0.11	6.1	-0.14	0.01	21.98	0.14	16.86	20	22.97	-2	1	0
		1899-12-31 22:16:49	2.52	-18.89	0.09	6.1	-0.14	0	21.98	0.14	17.47	19.39	22.35	-1.9	1.1	0
		1899-12-31 22:16:49	2.53	-18.28	0.08	6.1	-0.14	0	21.98	0.14	18.08	18.78	21.74	-1.8	1.2	0
		1899-12-31 22:16:50	2.54	-17.67	0.07	6.1	-0.14	0	21.98	0.14	18.69	18.17	21.13	-1.7	1.3	0
		1899-12-31 22:16:50	2.55	-17.06	0.05	6.1	-0.13	0	21.98	0.13	19.3	17.56	20.52	-1.6	1.4	0
		1899-12-31 22:16:50	2.55	-16.45	0.04	6.11	-0.13	0.01	21.98	0.13	19.91	16.95	19.91	-1.5	1.5	0
		1899-12-31 22:16:50	2.55	-15.84	0.03	6.11	-0.13	0.01	21.98	0.13	20.52	16.34	19.3	-1.4	1.6	0
		1899-12-31 22:16:50	2.56	-15.23	0.01	6.11	-0.13	0.02	21.99	0.13	21.13	15.73	18.69	-1.3	1.7	0.0278094
		1899-12-31 22:16:50	2.56	-14.62	0	6.11	-0.13	0.03	22	0.13	21.74	15.12	18.08	-1.2	1.8	0.0278221
		1899-12-31 22:16:50	2.56	-14.01	-0.01	6.11	-0.13	0.04	22.01	0.14	22.35	14.51	17.47	-1.1	1.9	0.0278347
		1899-12-31 22:16:50	2.55	-13.4	-0.03	6.12	-0.13	0.05	22.02	0.14	22.97	13.89	16.86	-1	2	0.0273982
		1899-12-31 22:16:50	2.55	-12.78	-0.04	6.12	-0.13	0.06	22.04	0.15	23.58	13.28	16.25	-0.9	2.1	0.0557326
		1899-12-31 22:16:50	2.55	-12.17	-0.05	6.13	-0.14	0.07	22.06	0.15	24.19	12.67	15.64	-0.8	2.2	0.0557832
		1899-12-31 22:16:51	2.54	-11.56	-0.07	6.13	-0.14	0.08	22.09	0.16	24.8	12.06	15.03	-0.7	2.3	0.0837697
		1899-12-31 22:16:51	2.53	-10.94	-0.08	6.14	-0.14	0.1	22.12	0.17	25.42	11.44	14.42	-0.6	2.4	0.0825306
		1899-12-31 22:16:51	2.52	-10.33	-0.1	6.15	-0.14	0.11	22.16	0.18	26.03	10.83	13.81	-0.5	2.5	0.112022
		1899-12-31 22:16:51	2.51	-9.71	-0.11	6.17	-0.14	0.13	22.2	0.19	26.65	10.21	13.2	-0.4	2.6	0.110414
		1899-12-31 22:16:51	2.5	-9.1	-0.12	6.18	-0.14	0.15	22.25	0.21	27.27	9.59	12.59	-0.3	2.7	0.138298
		1899-12-31 22:16:51	2.49	-8.48	-0.14	6.2	-0.14	0.18	22.31	0.23	27.88	8.98	11.98	-0.2	2.8	0.169095
		1899-12-31 22:16:51	2.47	-7.86	-0.15	6.21	-0.15	0.2	22.38	0.25	28.51	8.35	11.37	-0.1	2.9	0.191572
		1899-12-31 22:16:51	2.46	-7.23	-0.17	6.23	-0.15	0.23	22.45	0.27	29.13	7.73	10.77	0	3	0.195272							22.45	7.73
		1899-12-31 22:16:51	2.44	-6.61	-0.18	6.26	-0.15	0.26	22.54	0.3	29.75	7.11	10.16	0.1	3.1	0.25196
		1899-12-31 22:16:51	2.42	-5.98	-0.2	6.29	-0.15	0.29	22.64	0.32	30.38	6.48	9.56	0.2	3.2	0.276675
		1899-12-31 22:16:52	2.4	-5.35	-0.21	6.31	-0.15	0.32	22.75	0.35	31.01	5.85	8.95	0.3	3.3	0.305758
		1899-12-31 22:16:52	2.38	-4.72	-0.23	6.35	-0.15	0.35	22.87	0.38	31.64	5.22	8.35	0.4	3.4	0.335244
		1899-12-31 22:16:52	2.36	-4.08	-0.24	6.38	-0.15	0.37	22.99	0.4	32.28	4.58	7.75	0.5	3.5	0.331742
		1899-12-31 22:16:52	2.33	-3.44	-0.25	6.42	-0.15	0.4	23.13	0.42	32.92	3.94	7.14	0.6	3.6	0.389226
		1899-12-31 22:16:52	2.31	-2.8	-0.27	6.46	-0.15	0.42	23.28	0.44	33.57	3.29	6.54	0.7	3.7	0.413194
		1899-12-31 22:16:52	2.28	-2.15	-0.28	6.5	-0.15	0.44	23.44	0.46	34.21	2.65	5.94	0.8	3.8	0.450617
		1899-12-31 22:16:52	2.25	-1.5	-0.3	6.55	-0.15	0.45	23.6	0.48	34.87	1.99	5.35	0.9	3.9	0.439955
		1899-12-31 22:16:52	2.22	-0.84	-0.31	6.59	-0.15	0.47	23.77	0.49	35.53	1.33	4.75	1	4	0.470732
		1899-12-31 22:16:52	2.19	-0.18	-0.33	6.64	-0.15	0.48	23.94	0.5	36.19	0.67	4.15	1.1	4.1	0.47411
		1899-12-31 22:16:52	2.15	0.49	-0.34	6.69	-0.15	0.48	24.11	0.5	36.86	0	3.56	1.2	4.2	0.470362
		1899-12-31 22:16:53	2.12	1.16	-0.36	6.74	-0.15	0.49	24.29	0.51	37.53	-0.67	2.96	1.3	4.3	0.501658
		1899-12-31 22:16:53	2.08	1.84	-0.37	6.79	-0.15	0.49	24.47	0.51	38.21	-1.35	2.37	1.4	4.4	0.497958
		1899-12-31 22:16:53	2.04	2.52	-0.39	6.84	-0.15	0.49	24.65	0.51	38.89	-2.03	1.78	1.5	4.5	0.501634
		1899-12-31 22:16:53	2	3.2	-0.4	6.88	-0.15	0.49	24.83	0.52	39.57	-2.71	1.18	1.6	4.6	0.50531
		1899-12-31 22:16:53	1.96	3.89	-0.42	6.93	-0.15	0.5	25.01	0.52	40.27	-3.41	0.59	1.7	4.7	0.494444
		1899-12-31 22:16:53	1.92	4.59	-0.43	6.98	-0.15	0.5	25.19	0.52	40.96	-4.1	0	1.8	4.8	0.505233
17	1899-12-31 22:23:54	GlobalTime	X[m]	Y[m]	Vx[m/s]	Vy[m/s]	Ax[m/s2]	Ay[m/s2]	Speed[km/h]	Acceleration[m/s2]	Space[m]				3
		1899-12-31 22:23:46	2.15	-36.18	-0.11	6.74	0	0.05	24.25	0.05	0	36.88	48.63	-7.7	-4.7
		1899-12-31 22:23:47	2.14	-35.51	-0.11	6.74	0.01	0.07	24.27	0.07	0.67	36.21	47.84	-7.6	-4.6	0.055878
		1899-12-31 22:23:47	2.13	-34.83	-0.11	6.75	0.01	0.09	24.3	0.09	1.35	35.53	47.05	-7.5	-4.5	0.0826695
		1899-12-31 22:23:47	2.12	-34.16	-0.11	6.76	0.01	0.1	24.33	0.1	2.02	34.86	46.26	-7.4	-4.4	0.084007
		1899-12-31 22:23:47	2.11	-33.48	-0.11	6.77	0.01	0.12	24.37	0.12	2.7	34.18	45.48	-7.3	-4.3	0.110521
		1899-12-31 22:23:47	2.1	-32.8	-0.11	6.78	0.01	0.13	24.41	0.13	3.38	33.5	44.69	-7.2	-4.2	0.110703
		1899-12-31 22:23:47	2.09	-32.12	-0.11	6.79	0.02	0.15	24.46	0.15	4.06	32.82	43.91	-7.1	-4.1	0.138634
		1899-12-31 22:23:47	2.08	-31.44	-0.1	6.81	0.02	0.16	24.52	0.16	4.74	32.14	43.12	-7	-4	0.166735
		1899-12-31 22:23:47	2.07	-30.76	-0.1	6.83	0.02	0.18	24.58	0.18	5.42	31.46	42.34	-6.9	-3.9	0.167143
		1899-12-31 22:23:47	2.06	-30.08	-0.1	6.84	0.03	0.19	24.64	0.19	6.1	30.78	41.56	-6.8	-3.8	0.167552
		1899-12-31 22:23:47	2.05	-29.39	-0.1	6.86	0.03	0.2	24.71	0.2	6.79	30.09	40.78	-6.7	-3.7	0.193153
		1899-12-31 22:23:48	2.04	-28.71	-0.09	6.88	0.04	0.21	24.79	0.22	7.48	29.4	40	-6.6	-3.6	0.221417
		1899-12-31 22:23:48	2.03	-28.02	-0.09	6.91	0.05	0.22	24.86	0.23	8.17	28.71	39.22	-6.5	-3.5	0.194327
		1899-12-31 22:23:48	2.02	-27.32	-0.08	6.93	0.05	0.23	24.95	0.24	8.86	28.02	38.44	-6.4	-3.4	0.250654
		1899-12-31 22:23:48	2.01	-26.63	-0.08	6.95	0.06	0.24	25.03	0.25	9.55	27.33	37.66	-6.3	-3.3	0.223564
		1899-12-31 22:23:48	2	-25.93	-0.07	6.98	0.06	0.25	25.12	0.26	10.25	26.63	36.88	-6.2	-3.2	0.24876
		1899-12-31 22:23:48	2	-25.23	-0.07	7	0.07	0.26	25.21	0.27	10.95	25.93	36.11	-6.1	-3.1	0.249653
		1899-12-31 22:23:48	1.99	-24.53	-0.06	7.03	0.07	0.26	25.3	0.27	11.65	25.23	35.34	-6	-3	0.250546
		1899-12-31 22:23:48	1.98	-23.83	-0.05	7.06	0.08	0.27	25.4	0.28	12.35	24.53	34.56	-5.9	-2.9	0.279431
		1899-12-31 22:23:48	1.98	-23.12	-0.04	7.08	0.08	0.27	25.5	0.28	13.06	23.82	33.79	-5.8	-2.8	0.276582
		1899-12-31 22:23:48	1.98	-22.41	-0.03	7.11	0.09	0.27	25.59	0.28	13.77	23.11	33.03	-5.7	-2.7	0.249853
		1899-12-31 22:23:49	1.97	-21.7	-0.03	7.14	0.09	0.27	25.69	0.28	14.48	22.4	32.26	-5.6	-2.6	0.278647
		1899-12-31 22:23:49	1.97	-20.99	-0.02	7.16	0.1	0.27	25.79	0.28	15.2	21.68	31.5	-5.5	-2.5	0.275849
		1899-12-31 22:23:49	1.97	-20.27	-0.01	7.19	0.1	0.26	25.88	0.28	15.91	20.97	30.73	-5.4	-2.4	0.25269
		1899-12-31 22:23:49	1.97	-19.55	0	7.22	0.1	0.26	25.97	0.28	16.63	20.25	29.97	-5.3	-2.3	0.250048
		1899-12-31 22:23:49	1.97	-18.82	0.01	7.24	0.1	0.25	26.07	0.27	17.36	19.52	29.22	-5.2	-2.2	0.27503
		1899-12-31 22:23:49	1.97	-18.1	0.02	7.27	0.11	0.24	26.16	0.26	18.08	18.8	28.46	-5.1	-2.1	0.251881
		1899-12-31 22:23:49	1.97	-17.37	0.03	7.29	0.11	0.24	26.24	0.26	18.81	18.07	27.71	-5	-2	0.221546
		1899-12-31 22:23:49	1.98	-16.64	0.04	7.31	0.11	0.23	26.33	0.25	19.54	17.34	26.95	-4.9	-1.9	0.250048
		1899-12-31 22:23:49	1.98	-15.91	0.06	7.34	0.11	0.22	26.41	0.24	20.27	16.61	26.2	-4.8	-1.8	0.222983
		1899-12-31 22:23:49	1.99	-15.17	0.07	7.36	0.11	0.21	26.48	0.24	21.01	15.87	25.46	-4.7	-1.7	0.193021
		1899-12-31 22:23:50	2	-14.44	0.08	7.38	0.11	0.2	26.56	0.23	21.74	15.14	24.71	-4.6	-1.6	0.224252
		1899-12-31 22:23:50	2.01	-13.7	0.09	7.4	0.11	0.19	26.63	0.22	22.48	14.4	23.97	-4.5	-1.5	0.194116
		1899-12-31 22:23:50	2.01	-12.96	0.1	7.42	0.1	0.19	26.7	0.22	23.22	13.66	23.22	-4.4	-1.4	0.194627
		1899-12-31 22:23:50	2.02	-12.22	0.11	7.44	0.1	0.18	26.77	0.21	23.97	12.91	22.48	-4.3	-1.3	0.192536
		1899-12-31 22:23:50	2.04	-11.47	0.12	7.45	0.1	0.18	26.84	0.21	24.71	12.17	21.74	-4.2	-1.2	0.195649
		1899-12-31 22:23:50	2.05	-10.73	0.13	7.47	0.09	0.18	26.9	0.2	25.46	11.42	21.01	-4.1	-1.1	0.165864
		1899-12-31 22:23:50	2.06	-9.98	0.14	7.49	0.09	0.18	26.97	0.2	26.2	10.68	20.27	-4	-1	0.196598
		1899-12-31 22:23:50	2.08	-9.23	0.15	7.51	0.08	0.19	27.03	0.2	26.95	9.93	19.54	-3.9	-0.9	0.166667
		1899-12-31 22:23:50	2.09	-8.48	0.15	7.53	0.07	0.19	27.1	0.2	27.71	9.17	18.81	-3.8	-0.8	0.192348
		1899-12-31 22:23:50	2.11	-7.72	0.16	7.55	0.06	0.2	27.17	0.21	28.46	8.42	18.08	-3.7	-0.7	0.195417
		1899-12-31 22:23:51	2.12	-6.97	0.17	7.57	0.05	0.2	27.24	0.21	29.22	7.66	17.36	-3.6	-0.6	0.193343
		1899-12-31 22:23:51	2.14	-6.21	0.17	7.59	0.03	0.21	27.32	0.21	29.97	6.91	16.63	-3.5	-0.5	0.224527
		1899-12-31 22:23:51	2.16	-5.45	0.17	7.61	0.02	0.21	27.39	0.21	30.73	6.15	15.91	-3.4	-0.4	0.194409
		1899-12-31 22:23:51	2.17	-4.69	0.17	7.63	0.01	0.2	27.47	0.2	31.5	5.38	15.2	-3.3	-0.3	0.219897
		1899-12-31 22:23:51	2.19	-3.92	0.17	7.65	-0.01	0.2	27.54	0.2	32.26	4.62	14.48	-3.2	-0.2	0.195475
		1899-12-31 22:23:51	2.21	-3.16	0.17	7.67	-0.02	0.19	27.61	0.19	33.03	3.85	13.77	-3.1	-0.1	0.193427
		1899-12-31 22:23:51	2.23	-2.39	0.17	7.69	-0.04	0.19	27.68	0.19	33.79	3.09	13.06	-3	9.12337e-12	0.19647					27.68	3.09
		1899-12-31 22:23:51	2.24	-1.62	0.17	7.7	-0.05	0.18	27.74	0.18	34.56	2.32	12.35	-2.9	0.1	0.166607
		1899-12-31 22:23:51	2.26	-0.85	0.16	7.72	-0.06	0.17	27.81	0.18	35.34	1.54	11.65	-2.8	0.2	0.192332
		1899-12-31 22:23:51	2.27	-0.08	0.15	7.74	-0.07	0.15	27.86	0.17	36.11	0.77	10.95	-2.7	0.3	0.139465
		1899-12-31 22:23:52	2.29	0.7	0.15	7.75	-0.08	0.14	27.92	0.17	36.88	0	10.25	-2.6	0.4	0.167689
		1899-12-31 22:23:52	2.3	1.47	0.14	7.77	-0.09	0.13	27.97	0.16	37.66	-0.78	9.55	-2.5	0.5	0.138221
		1899-12-31 22:23:52	2.32	2.25	0.13	7.78	-0.1	0.12	28.01	0.16	38.44	-1.56	8.86	-2.4	0.6	0.110755
		1899-12-31 22:23:52	2.33	3.03	0.12	7.79	-0.11	0.11	28.05	0.15	39.22	-2.34	8.17	-2.3	0.7	0.110913
		1899-12-31 22:23:52	2.34	3.81	0.11	7.8	-0.12	0.1	28.09	0.15	40	-3.12	7.48	-2.2	0.8	0.111072
		1899-12-31 22:23:52	2.35	4.59	0.09	7.81	-0.12	0.09	28.12	0.15	40.78	-3.9	6.79	-2.1	0.9	0.0834075
		1899-12-31 22:23:52	2.36	5.37	0.08	7.82	-0.12	0.08	28.16	0.15	41.56	-4.68	6.1	-2	1	0.111349
		1899-12-31 22:23:52	2.37	6.16	0.07	7.83	-0.13	0.08	28.18	0.15	42.34	-5.46	5.42	-1.9	1.1	0.0557336
		1899-12-31 22:23:52	2.37	6.94	0.06	7.84	-0.13	0.07	28.21	0.15	43.12	-6.24	4.74	-1.8	1.2	0.0836746
		1899-12-31 22:23:52	2.38	7.72	0.04	7.84	-0.13	0.07	28.24	0.15	43.91	-7.03	4.06	-1.7	1.3	0.0827034
		1899-12-31 22:23:53	2.38	8.51	0.03	7.85	-0.13	0.07	28.26	0.15	44.69	-7.81	3.38	-1.6	1.4	0.0558919
		1899-12-31 22:23:53	2.38	9.29	0.02	7.86	-0.14	0.07	28.29	0.15	45.48	-8.6	2.7	-1.5	1.5	0.0828499
		1899-12-31 22:23:53	2.38	10.08	0	7.86	-0.14	0.07	28.31	0.15	46.26	-9.38	2.02	-1.4	1.6	0.0559908
		1899-12-31 22:23:53	2.38	10.87	-0.01	7.87	-0.14	0.07	28.34	0.15	47.05	-10.17	1.35	-1.3	1.7	0.0829964
		1899-12-31 22:23:53	2.38	11.65	-0.03	7.88	-0.14	0.07	28.36	0.15	47.84	-10.96	0.67	-1.2	1.8	0.0553797
		1899-12-31 22:23:53	2.38	12.44	-0.04	7.88	-0.14	0.07	28.38	0.15	48.63	-11.75	0	-1.1	1.9	0.0554188
18	1899-12-31 22:37:29	GlobalTime	X[m]	Y[m]	Vx[m/s]	Vy[m/s]	Ax[m/s2]	Ay[m/s2]	Speed[km/h]	Acceleration[m/s2]	Space[m]				3
		1899-12-31 22:37:22	2.52	-36.29	-0.12	6.79	0	0.02	24.44	0.02	0	36.93	40.99	-7.1	-4.1
		1899-12-31 22:37:22	2.51	-35.61	-0.12	6.79	0.01	0.03	24.45	0.03	0.68	36.25	40.31	-7	-4	0.0277381
		1899-12-31 22:37:22	2.5	-34.93	-0.12	6.79	0.01	0.03	24.46	0.03	1.36	35.57	39.64	-6.9	-3.9	0.0277494
		1899-12-31 22:37:22	2.48	-34.26	-0.12	6.8	0.01	0.04	24.47	0.04	2.04	34.89	38.96	-6.8	-3.8	0.0277608
		1899-12-31 22:37:22	2.47	-33.58	-0.12	6.8	0.01	0.04	24.48	0.04	2.72	34.21	38.28	-6.7	-3.7	0.0277721
		1899-12-31 22:37:22	2.46	-32.9	-0.12	6.8	0.01	0.05	24.5	0.05	3.4	33.53	37.6	-6.6	-3.6	0.0555782
		1899-12-31 22:37:22	2.45	-32.22	-0.12	6.81	0.01	0.05	24.52	0.05	4.08	32.85	36.93	-6.5	-3.5	0.0556236
		1899-12-31 22:37:22	2.44	-31.53	-0.12	6.81	0.01	0.06	24.54	0.06	4.76	32.17	36.25	-6.4	-3.4	0.055669
		1899-12-31 22:37:22	2.42	-30.85	-0.12	6.82	0.01	0.06	24.56	0.06	5.44	31.49	35.57	-6.3	-3.3	0.0557144
		1899-12-31 22:37:23	2.41	-30.17	-0.11	6.83	0.01	0.06	24.58	0.06	6.12	30.81	34.89	-6.2	-3.2	0.0557598
		1899-12-31 22:37:23	2.4	-29.49	-0.11	6.83	0.02	0.06	24.6	0.06	6.81	30.12	34.21	-6.1	-3.1	0.0549964
		1899-12-31 22:37:23	2.39	-28.8	-0.11	6.84	0.02	0.06	24.62	0.06	7.49	29.44	33.53	-6	-3	0.0558506
		1899-12-31 22:37:23	2.38	-28.12	-0.11	6.85	0.02	0.06	24.65	0.06	8.17	28.76	32.85	-5.9	-2.9	0.083861
		1899-12-31 22:37:23	2.37	-27.43	-0.11	6.85	0.02	0.06	24.67	0.06	8.86	28.07	32.17	-5.8	-2.8	0.055153
		1899-12-31 22:37:23	2.36	-26.75	-0.11	6.86	0.02	0.06	24.69	0.06	9.55	27.38	31.49	-5.7	-2.7	0.0551977
		1899-12-31 22:37:23	2.35	-26.06	-0.1	6.86	0.02	0.05	24.71	0.06	10.23	26.7	30.8	-5.6	-2.6	0.0560548
		1899-12-31 22:37:23	2.34	-25.38	-0.1	6.87	0.03	0.05	24.73	0.05	10.92	26.01	30.12	-5.5	-2.5	0.0552872
		1899-12-31 22:37:23	2.33	-24.69	-0.1	6.87	0.03	0.04	24.74	0.05	11.61	25.32	29.44	-5.4	-2.4	0.0276604
		1899-12-31 22:37:23	2.32	-24	-0.1	6.88	0.03	0.03	24.76	0.05	12.29	24.64	28.76	-5.3	-2.3	0.0561683
		1899-12-31 22:37:24	2.31	-23.31	-0.09	6.88	0.03	0.03	24.77	0.04	12.98	23.95	28.08	-5.2	-2.2	0.0276939
		1899-12-31 22:37:24	2.3	-22.63	-0.09	6.88	0.04	0.02	24.78	0.04	13.67	23.26	27.4	-5.1	-2.1	0.0277051
		1899-12-31 22:37:24	2.29	-21.94	-0.09	6.88	0.04	0.01	24.78	0.04	14.36	22.57	26.71	-5	-2	0
		1899-12-31 22:37:24	2.28	-21.25	-0.08	6.88	0.05	0	24.79	0.05	15.05	21.88	26.03	-4.9	-1.9	0.0277163
		1899-12-31 22:37:24	2.27	-20.56	-0.08	6.88	0.05	0	24.79	0.05	15.73	21.2	25.35	-4.8	-1.8	0
		1899-12-31 22:37:24	2.27	-19.87	-0.07	6.88	0.05	-0.01	24.78	0.05	16.42	20.51	24.66	-4.7	-1.7	-0.0277163
		1899-12-31 22:37:24	2.26	-19.18	-0.07	6.88	0.05	-0.02	24.78	0.06	17.11	19.82	23.98	-4.6	-1.6	0
		1899-12-31 22:37:24	2.25	-18.5	-0.06	6.88	0.05	-0.02	24.77	0.06	17.8	19.13	23.29	-4.5	-1.5	-0.0277051
		1899-12-31 22:37:24	2.25	-17.81	-0.06	6.88	0.06	-0.03	24.76	0.06	18.49	18.44	22.61	-4.4	-1.4	-0.0276939
		1899-12-31 22:37:24	2.24	-17.12	-0.05	6.87	0.06	-0.03	24.75	0.07	19.17	17.76	21.92	-4.3	-1.3	-0.0280898
		1899-12-31 22:37:25	2.24	-16.43	-0.04	6.87	0.06	-0.04	24.74	0.07	19.86	17.07	21.24	-4.2	-1.2	-0.0276715
		1899-12-31 22:37:25	2.23	-15.75	-0.04	6.87	0.05	-0.04	24.72	0.07	20.55	16.38	20.55	-4.1	-1.1	-0.0553095
		1899-12-31 22:37:25	2.23	-15.06	-0.03	6.86	0.05	-0.04	24.71	0.07	21.24	15.69	19.86	-4	-1	-0.027638
		1899-12-31 22:37:25	2.22	-14.37	-0.03	6.86	0.05	-0.04	24.69	0.06	21.92	15.01	19.17	-3.9	-0.9	-0.0560548
		1899-12-31 22:37:25	2.22	-13.69	-0.02	6.86	0.04	-0.04	24.68	0.06	22.61	14.32	18.49	-3.8	-0.8	-0.0276044
		1899-12-31 22:37:25	2.22	-13	-0.02	6.85	0.04	-0.04	24.66	0.06	23.29	13.64	17.8	-3.7	-0.7	-0.0559867
		1899-12-31 22:37:25	2.22	-12.32	-0.02	6.85	0.03	-0.04	24.65	0.05	23.98	12.95	17.11	-3.6	-0.6	-0.0275709
		1899-12-31 22:37:25	2.22	-11.63	-0.01	6.84	0.03	-0.04	24.63	0.05	24.66	12.27	16.42	-3.5	-0.5	-0.0559187
		1899-12-31 22:37:25	2.22	-10.95	-0.01	6.84	0.02	-0.04	24.62	0.05	25.35	11.58	15.73	-3.4	-0.4	-0.0275374
		1899-12-31 22:37:25	2.21	-10.27	-0.01	6.83	0.01	-0.04	24.6	0.04	26.03	10.9	15.05	-3.3	-0.3	-0.0558506
		1899-12-31 22:37:26	2.21	-9.58	-0.01	6.83	0	-0.04	24.59	0.04	26.71	10.22	14.36	-3.2	-0.2	-0.0279083
		1899-12-31 22:37:26	2.21	-8.9	-0.01	6.83	0	-0.03	24.57	0.03	27.4	9.53	13.67	-3.1	-0.1	-0.0549741
		1899-12-31 22:37:26	2.21	-8.22	-0.01	6.82	-0.01	-0.03	24.56	0.03	28.08	8.85	12.98	-3	-4.68958e-13	-0.0278742					24.56	8.85
		1899-12-31 22:37:26	2.21	-7.54	-0.01	6.82	-0.02	-0.03	24.55	0.04	28.76	8.17	12.29	-2.9	0.1	-0.0278629
		1899-12-31 22:37:26	2.21	-6.85	-0.01	6.82	-0.03	-0.03	24.54	0.04	29.44	7.49	11.61	-2.8	0.2	-0.0278515
		1899-12-31 22:37:26	2.21	-6.17	-0.02	6.81	-0.04	-0.02	24.53	0.05	30.12	6.81	10.92	-2.7	0.3	-0.0278402
		1899-12-31 22:37:26	2.21	-5.49	-0.02	6.81	-0.05	-0.02	24.52	0.05	30.8	6.13	10.23	-2.6	0.4	-0.0278288
		1899-12-31 22:37:26	2.2	-4.81	-0.02	6.81	-0.05	-0.02	24.52	0.06	31.49	5.44	9.55	-2.5	0.5	0
		1899-12-31 22:37:26	2.2	-4.13	-0.03	6.81	-0.06	-0.02	24.51	0.07	32.17	4.76	8.86	-2.4	0.6	-0.0278175
		1899-12-31 22:37:26	2.2	-3.45	-0.04	6.81	-0.07	-0.02	24.5	0.07	32.85	4.08	8.17	-2.3	0.7	-0.0278061
		1899-12-31 22:37:27	2.19	-2.77	-0.04	6.8	-0.07	-0.03	24.49	0.08	33.53	3.4	7.49	-2.2	0.8	-0.0277948
		1899-12-31 22:37:27	2.19	-2.09	-0.05	6.8	-0.08	-0.03	24.48	0.08	34.21	2.72	6.81	-2.1	0.9	-0.0277835
		1899-12-31 22:37:27	2.18	-1.41	-0.06	6.8	-0.08	-0.03	24.47	0.09	34.89	2.04	6.12	-2	1	-0.0277721
		1899-12-31 22:37:27	2.18	-0.73	-0.07	6.79	-0.09	-0.03	24.46	0.09	35.57	1.36	5.44	-1.9	1.1	-0.0277608
		1899-12-31 22:37:27	2.17	-0.05	-0.08	6.79	-0.09	-0.04	24.45	0.1	36.25	0.68	4.76	-1.8	1.2	-0.0277494
		1899-12-31 22:37:27	2.16	0.63	-0.09	6.79	-0.09	-0.04	24.43	0.1	36.93	0	4.08	-1.7	1.3	-0.0554648
		1899-12-31 22:37:27	2.15	1.31	-0.1	6.78	-0.1	-0.04	24.42	0.1	37.6	-0.67	3.4	-1.6	1.4	-0.028129
		1899-12-31 22:37:27	2.14	1.99	-0.11	6.78	-0.1	-0.04	24.41	0.11	38.28	-1.35	2.72	-1.5	1.5	-0.027704
		1899-12-31 22:37:27	2.13	2.66	-0.11	6.77	-0.1	-0.04	24.39	0.11	38.96	-2.03	2.04	-1.4	1.6	-0.055374
		1899-12-31 22:37:27	2.12	3.34	-0.12	6.77	-0.1	-0.04	24.38	0.11	39.64	-2.71	1.36	-1.3	1.7	-0.02767
		1899-12-31 22:37:28	2.11	4.02	-0.13	6.77	-0.1	-0.04	24.36	0.11	40.31	-3.38	0.68	-1.2	1.8	-0.0561314
		1899-12-31 22:37:28	2.09	4.7	-0.14	6.76	-0.1	-0.04	24.35	0.11	40.99	-4.06	0	-1.1	1.9	-0.0276359
19	1899-12-31 22:40:58	GlobalTime	X[m]	Y[m]	Vx[m/s]	Vy[m/s]	Ax[m/s2]	Ay[m/s2]	Speed[km/h]	Acceleration[m/s2]	Space[m]				3
		1899-12-31 22:40:54	2.21	-36	-0.28	8.46	0.03	-0.01	30.46	0.03	0	36.3	40.5	-3.7	-0.7
		1899-12-31 22:40:54	2.18	-35.16	-0.28	8.46	0.04	-0.01	30.46	0.04	0.85	35.45	39.66	-3.6	-0.6	0
		1899-12-31 22:40:54	2.15	-34.31	-0.27	8.45	0.05	-0.01	30.45	0.05	1.69	34.61	38.82	-3.5	-0.5	-0.0279753
		1899-12-31 22:40:54	2.13	-33.47	-0.27	8.45	0.06	-0.02	30.45	0.06	2.54	33.76	37.98	-3.4	-0.4	0
		1899-12-31 22:40:54	2.1	-32.62	-0.26	8.45	0.07	-0.02	30.44	0.07	3.38	32.92	37.14	-3.3	-0.3	-0.0279661
		1899-12-31 22:40:54	2.07	-31.78	-0.25	8.45	0.08	-0.02	30.43	0.08	4.23	32.07	36.3	-3.2	-0.2	-0.027628
		1899-12-31 22:40:55	2.05	-30.93	-0.24	8.45	0.09	-0.02	30.42	0.09	5.07	31.23	35.46	-3.1	-0.1	-0.0279477
		1899-12-31 22:40:55	2.03	-30.09	-0.24	8.45	0.09	-0.02	30.41	0.1	5.92	30.38	34.61	-3	-4.68958e-13	-0.0276098					30.41	30.38
		1899-12-31 22:40:55	2	-29.24	-0.23	8.44	0.1	-0.02	30.41	0.1	6.76	29.54	33.77	-2.9	0.1	0
		1899-12-31 22:40:55	1.98	-28.4	-0.22	8.44	0.11	-0.02	30.4	0.11	7.61	28.69	32.93	-2.8	0.2	-0.0276008
		1899-12-31 22:40:55	1.96	-27.55	-0.2	8.44	0.11	-0.02	30.39	0.11	8.45	27.85	32.09	-2.7	0.3	-0.0279202
		1899-12-31 22:40:55	1.94	-26.71	-0.19	8.44	0.11	-0.01	30.39	0.11	9.3	27	31.24	-2.6	0.4	0
		1899-12-31 22:40:55	1.92	-25.87	-0.18	8.44	0.12	-0.01	30.38	0.12	10.14	26.16	30.4	-2.5	0.5	-0.027911
		1899-12-31 22:40:55	1.9	-25.02	-0.17	8.44	0.12	-0.01	30.38	0.12	10.98	25.32	29.55	-2.4	0.6	0
		1899-12-31 22:40:55	1.89	-24.18	-0.16	8.44	0.12	0	30.37	0.12	11.83	24.47	28.71	-2.3	0.7	-0.0275735
		1899-12-31 22:40:55	1.87	-23.34	-0.15	8.44	0.12	0	30.37	0.12	12.67	23.63	27.87	-2.2	0.8	0
		1899-12-31 22:40:56	1.86	-22.49	-0.14	8.44	0.12	0	30.37	0.12	13.52	22.78	27.02	-2.1	0.9	0
		1899-12-31 22:40:56	1.84	-21.65	-0.12	8.44	0.11	0.01	30.37	0.11	14.36	21.94	26.18	-2	1	0
		1899-12-31 22:40:56	1.83	-20.81	-0.11	8.44	0.11	0.01	30.38	0.11	15.2	21.1	25.33	-1.9	1.1	0.0279018
		1899-12-31 22:40:56	1.82	-19.96	-0.1	8.44	0.11	0.01	30.38	0.11	16.05	20.25	24.49	-1.8	1.2	0
		1899-12-31 22:40:56	1.81	-19.12	-0.09	8.44	0.1	0.01	30.38	0.1	16.89	19.41	23.65	-1.7	1.3	0
		1899-12-31 22:40:56	1.8	-18.27	-0.08	8.44	0.1	0.01	30.39	0.1	17.73	18.57	22.8	-1.6	1.4	0.027911
		1899-12-31 22:40:56	1.8	-17.43	-0.07	8.44	0.09	0.01	30.39	0.09	18.58	17.72	21.96	-1.5	1.5	0
		1899-12-31 22:40:56	1.79	-16.59	-0.06	8.44	0.09	0.01	30.39	0.09	19.42	16.88	21.11	-1.4	1.6	0
		1899-12-31 22:40:56	1.78	-15.74	-0.05	8.44	0.08	0.01	30.4	0.08	20.27	16.03	20.27	-1.3	1.7	0.0275917
		1899-12-31 22:40:56	1.78	-14.9	-0.04	8.44	0.08	0	30.4	0.08	21.11	15.19	19.42	-1.2	1.8	0
		1899-12-31 22:40:57	1.78	-14.05	-0.04	8.44	0.07	0	30.4	0.07	21.96	14.34	18.58	-1.1	1.9	0
		1899-12-31 22:40:57	1.77	-13.21	-0.03	8.44	0.06	0	30.4	0.06	22.8	13.5	17.73	-1	2	0
		1899-12-31 22:40:57	1.77	-12.36	-0.03	8.44	0.05	0	30.4	0.05	23.65	12.65	16.89	-0.9	2.1	0
		1899-12-31 22:40:57	1.77	-11.52	-0.02	8.44	0.05	-0.01	30.4	0.05	24.49	11.81	16.05	-0.8	2.2	0
		1899-12-31 22:40:57	1.77	-10.68	-0.02	8.44	0.04	-0.01	30.39	0.04	25.33	10.97	15.2	-0.7	2.3	-0.0279202
		1899-12-31 22:40:57	1.76	-9.83	-0.01	8.44	0.03	-0.01	30.39	0.03	26.18	10.12	14.36	-0.6	2.4	0
		1899-12-31 22:40:57	1.76	-8.99	-0.01	8.44	0.03	-0.01	30.39	0.03	27.02	9.28	13.52	-0.5	2.5	0
		1899-12-31 22:40:57	1.76	-8.14	-0.01	8.44	0.02	-0.01	30.39	0.02	27.87	8.43	12.67	-0.4	2.6	0
		1899-12-31 22:40:57	1.76	-7.3	0	8.44	0.01	-0.01	30.38	0.02	28.71	7.59	11.83	-0.3	2.7	-0.027911
		1899-12-31 22:40:57	1.76	-6.45	0	8.44	0.01	-0.01	30.38	0.01	29.55	6.75	10.98	-0.2	2.8	0
		1899-12-31 22:40:58	1.76	-5.61	0	8.44	0.01	-0.01	30.38	0.01	30.4	5.9	10.14	-0.1	2.9	0
		1899-12-31 22:40:58	1.76	-4.77	0	8.44	0	-0.02	30.37	0.02	31.24	5.06	9.3	0	3	-0.0279018							30.37	5.06
		1899-12-31 22:40:58	1.76	-3.92	0	8.43	0	-0.02	30.36	0.02	32.09	4.21	8.45	0.1	3.1	-0.0275645
		1899-12-31 22:40:58	1.76	-3.08	0	8.43	0	-0.03	30.35	0.03	32.93	3.37	7.61	0.2	3.2	-0.0278834
		1899-12-31 22:40:58	1.76	-2.24	0	8.43	0	-0.04	30.34	0.04	33.77	2.53	6.76	0.3	3.3	-0.0278742
		1899-12-31 22:40:58	1.76	-1.39	0	8.42	-0.01	-0.05	30.33	0.05	34.61	1.69	5.92	0.4	3.4	-0.027865
		1899-12-31 22:40:58	1.76	-0.55	0	8.42	-0.01	-0.05	30.31	0.05	35.46	0.84	5.07	0.5	3.5	-0.0550472
		1899-12-31 22:40:58	1.76	0.29	0	8.41	-0.01	-0.06	30.29	0.06	36.3	0	4.23	0.6	3.6	-0.0556658
		1899-12-31 22:40:58	1.76	1.13	0	8.41	-0.01	-0.06	30.27	0.06	37.14	-0.84	3.38	0.7	3.7	-0.055629
		1899-12-31 22:40:58	1.76	1.97	-0.01	8.4	-0.01	-0.06	30.25	0.06	37.98	-1.68	2.54	0.8	3.8	-0.0555923
		1899-12-31 22:40:59	1.76	2.81	-0.01	8.4	-0.01	-0.06	30.23	0.06	38.82	-2.52	1.69	0.9	3.9	-0.0555556
		1899-12-31 22:40:59	1.76	3.65	-0.01	8.39	-0.01	-0.06	30.2	0.06	39.66	-3.36	0.85	1	4	-0.0832644
		1899-12-31 22:40:59	1.76	4.49	-0.01	8.38	-0.01	-0.06	30.18	0.06	40.5	-4.2	0	1.1	4.1	-0.0554637
20	1899-12-31 22:51:22	GlobalTime	X[m]	Y[m]	Vx[m/s]	Vy[m/s]	Ax[m/s2]	Ay[m/s2]	Speed[km/h]	Acceleration[m/s2]	Space[m]				3
		1899-12-31 22:51:17	3.09	-36.26	0.01	6.75	-0.05	0	24.29	0.05	0	36.38	44.63	-4.2	-1.2
		1899-12-31 22:51:18	3.09	-35.58	0.01	6.75	-0.07	0.01	24.29	0.07	0.67	35.71	43.94	-4.1	-1.1	0
		1899-12-31 22:51:18	3.09	-34.91	0	6.75	-0.08	0.01	24.29	0.08	1.35	35.03	43.25	-4	-1	0
		1899-12-31 22:51:18	3.09	-34.23	-0.01	6.75	-0.1	0.01	24.29	0.1	2.02	34.36	42.56	-3.9	-0.9	0
		1899-12-31 22:51:18	3.09	-33.56	-0.02	6.75	-0.11	0.01	24.3	0.11	2.7	33.68	41.87	-3.8	-0.8	0.0275679
		1899-12-31 22:51:18	3.09	-32.88	-0.03	6.75	-0.13	0.01	24.3	0.13	3.37	33.01	41.18	-3.7	-0.7	0
		1899-12-31 22:51:18	3.09	-32.21	-0.04	6.75	-0.14	0.01	24.3	0.14	4.05	32.33	40.49	-3.6	-0.6	0
		1899-12-31 22:51:18	3.08	-31.53	-0.06	6.75	-0.15	0.01	24.31	0.15	4.72	31.66	39.8	-3.5	-0.5	0.0279908
		1899-12-31 22:51:18	3.07	-30.86	-0.07	6.75	-0.17	0.01	24.31	0.17	5.4	30.98	39.12	-3.4	-0.4	0
		1899-12-31 22:51:18	3.07	-30.18	-0.09	6.75	-0.18	0.01	24.32	0.18	6.07	30.31	38.43	-3.3	-0.3	0.0280023
		1899-12-31 22:51:18	3.06	-29.51	-0.11	6.76	-0.19	0.01	24.32	0.19	6.75	29.63	37.75	-3.2	-0.2	0
		1899-12-31 22:51:19	3.04	-28.83	-0.13	6.76	-0.2	0.01	24.32	0.2	7.43	28.95	37.07	-3.1	-0.1	0
		1899-12-31 22:51:19	3.03	-28.16	-0.15	6.76	-0.2	0	24.33	0.2	8.1	28.28	36.38	-3	-4.68958e-13	0.0280139					24.33	28.28
		1899-12-31 22:51:19	3.01	-27.48	-0.17	6.76	-0.21	0	24.33	0.21	8.78	27.6	35.7	-2.9	0.1	0
		1899-12-31 22:51:19	3	-26.81	-0.19	6.76	-0.21	0	24.33	0.21	9.45	26.93	35.02	-2.8	0.2	0
		1899-12-31 22:51:19	2.98	-26.13	-0.21	6.76	-0.22	-0.01	24.33	0.22	10.13	26.25	34.34	-2.7	0.3	0
		1899-12-31 22:51:19	2.95	-25.45	-0.23	6.76	-0.22	-0.01	24.33	0.22	10.81	25.57	33.67	-2.6	0.4	0
		1899-12-31 22:51:19	2.93	-24.78	-0.25	6.75	-0.22	-0.01	24.33	0.22	11.48	24.9	32.99	-2.5	0.5	0
		1899-12-31 22:51:19	2.9	-24.1	-0.28	6.75	-0.21	-0.02	24.33	0.21	12.16	24.22	32.31	-2.4	0.6	0
		1899-12-31 22:51:19	2.87	-23.43	-0.3	6.75	-0.21	-0.02	24.33	0.21	12.83	23.55	31.64	-2.3	0.7	0
		1899-12-31 22:51:19	2.84	-22.75	-0.32	6.75	-0.2	-0.03	24.32	0.2	13.51	22.87	30.96	-2.2	0.8	-0.0276019
		1899-12-31 22:51:20	2.81	-22.08	-0.34	6.74	-0.19	-0.03	24.31	0.19	14.18	22.2	30.29	-2.1	0.9	-0.0280023
		1899-12-31 22:51:20	2.78	-21.41	-0.36	6.74	-0.18	-0.04	24.3	0.18	14.86	21.52	29.62	-2	1	-0.0275792
		1899-12-31 22:51:20	2.74	-20.73	-0.37	6.74	-0.16	-0.04	24.29	0.17	15.53	20.85	28.95	-1.9	1.1	-0.0279793
		1899-12-31 22:51:20	2.7	-20.06	-0.39	6.73	-0.14	-0.05	24.28	0.15	16.21	20.17	28.28	-1.8	1.2	-0.0275565
		1899-12-31 22:51:20	2.66	-19.38	-0.4	6.73	-0.13	-0.05	24.26	0.14	16.88	19.5	27.61	-1.7	1.3	-0.0559011
		1899-12-31 22:51:20	2.62	-18.71	-0.41	6.72	-0.11	-0.06	24.25	0.12	17.56	18.82	26.94	-1.6	1.4	-0.0275225
		1899-12-31 22:51:20	2.58	-18.04	-0.42	6.72	-0.09	-0.06	24.23	0.11	18.23	18.15	26.27	-1.5	1.5	-0.055832
		1899-12-31 22:51:20	2.54	-17.37	-0.43	6.71	-0.07	-0.06	24.21	0.09	18.9	17.48	25.6	-1.4	1.6	-0.0557859
		1899-12-31 22:51:20	2.49	-16.7	-0.44	6.7	-0.05	-0.06	24.18	0.08	19.57	16.81	24.93	-1.3	1.7	-0.0835925
		1899-12-31 22:51:20	2.45	-16.03	-0.44	6.7	-0.03	-0.06	24.16	0.07	20.25	16.13	24.26	-1.2	1.8	-0.054852
		1899-12-31 22:51:21	2.41	-15.36	-0.44	6.69	-0.01	-0.06	24.14	0.06	20.92	15.46	23.6	-1.1	1.9	-0.0556247
		1899-12-31 22:51:21	2.36	-14.69	-0.44	6.69	0.01	-0.05	24.12	0.05	21.59	14.79	22.93	-1	2	-0.0555786
		1899-12-31 22:51:21	2.32	-14.02	-0.44	6.68	0.03	-0.04	24.1	0.05	22.26	14.12	22.26	-0.9	2.1	-0.0555325
		1899-12-31 22:51:21	2.27	-13.35	-0.44	6.68	0.05	-0.03	24.09	0.06	22.93	13.45	21.59	-0.8	2.2	-0.027749
		1899-12-31 22:51:21	2.23	-12.69	-0.43	6.67	0.06	-0.02	24.08	0.07	23.6	12.78	20.92	-0.7	2.3	-0.0277375
		1899-12-31 22:51:21	2.19	-12.02	-0.43	6.67	0.08	-0.01	24.07	0.08	24.26	12.12	20.25	-0.6	2.4	-0.028146
		1899-12-31 22:51:21	2.14	-11.35	-0.42	6.67	0.09	0.01	24.07	0.09	24.93	11.45	19.57	-0.5	2.5	0
		1899-12-31 22:51:21	2.1	-10.68	-0.41	6.67	0.1	0.02	24.07	0.1	25.6	10.78	18.9	-0.4	2.6	0
		1899-12-31 22:51:21	2.06	-10.02	-0.4	6.68	0.11	0.04	24.07	0.11	26.27	10.11	18.23	-0.3	2.7	0
		1899-12-31 22:51:21	2.02	-9.35	-0.39	6.68	0.11	0.05	24.09	0.12	26.94	9.44	17.56	-0.2	2.8	0.0554634
		1899-12-31 22:51:22	1.98	-8.68	-0.38	6.69	0.12	0.06	24.1	0.13	27.61	8.77	16.88	-0.1	2.9	0.027749
		1899-12-31 22:51:22	1.95	-8.01	-0.37	6.69	0.12	0.07	24.13	0.14	28.28	8.1	16.21	0	3	0.0833161							24.13	8.1
		1899-12-31 22:51:22	1.91	-7.34	-0.35	6.7	0.12	0.08	24.15	0.15	28.95	7.43	15.53	0.1	3.1	0.0556016
		1899-12-31 22:51:22	1.88	-6.67	-0.34	6.71	0.12	0.09	24.18	0.15	29.62	6.76	14.86	0.2	3.2	0.0834888
		1899-12-31 22:51:22	1.84	-6	-0.33	6.72	0.12	0.1	24.21	0.16	30.29	6.09	14.18	0.3	3.3	0.0835925
		1899-12-31 22:51:22	1.81	-5.33	-0.32	6.73	0.12	0.1	24.24	0.16	30.96	5.42	13.51	0.4	3.4	0.0836961
		1899-12-31 22:51:22	1.78	-4.66	-0.3	6.74	0.12	0.1	24.28	0.16	31.64	4.74	12.83	0.5	3.5	0.110113
		1899-12-31 22:51:22	1.75	-3.98	-0.29	6.75	0.11	0.1	24.31	0.15	32.31	4.07	12.16	0.6	3.6	0.0839379
		1899-12-31 22:51:22	1.72	-3.31	-0.28	6.76	0.11	0.11	24.35	0.15	32.99	3.39	11.48	0.7	3.7	0.11043
		1899-12-31 22:51:22	1.69	-2.63	-0.27	6.77	0.11	0.11	24.39	0.15	33.67	2.71	10.81	0.8	3.8	0.110612
		1899-12-31 22:51:23	1.67	-1.95	-0.26	6.78	0.1	0.11	24.42	0.15	34.34	2.04	10.13	0.9	3.9	0.084318
		1899-12-31 22:51:23	1.64	-1.27	-0.25	6.79	0.1	0.11	24.46	0.14	35.02	1.36	9.45	1	4	0.11093
		1899-12-31 22:51:23	1.62	-0.59	-0.24	6.8	0.09	0.11	24.5	0.14	35.7	0.68	8.78	1.1	4.1	0.111111
		1899-12-31 22:51:23	1.59	0.09	-0.23	6.81	0.09	0.11	24.54	0.14	36.38	0	8.1	1.2	4.2	0.111293
		1899-12-31 22:51:23	1.57	0.77	-0.22	6.82	0.08	0.1	24.57	0.13	37.07	-0.69	7.43	1.3	4.3	0.0823772
		1899-12-31 22:51:23	1.55	1.45	-0.22	6.83	0.08	0.1	24.61	0.13	37.75	-1.37	6.75	1.4	4.4	0.11161
		1899-12-31 22:51:23	1.53	2.13	-0.21	6.84	0.07	0.1	24.64	0.12	38.43	-2.05	6.07	1.5	4.5	0.0838269
		1899-12-31 22:51:23	1.51	2.82	-0.2	6.85	0.07	0.09	24.68	0.11	39.12	-2.74	5.4	1.6	4.6	0.110306
		1899-12-31 22:51:23	1.49	3.5	-0.2	6.86	0.07	0.09	24.71	0.11	39.8	-3.42	4.72	1.7	4.7	0.0840652
		1899-12-31 22:51:23	1.47	4.19	-0.19	6.87	0.06	0.09	24.74	0.11	40.49	-4.11	4.05	1.8	4.8	0.0829475
		1899-12-31 22:51:24	1.45	4.88	-0.18	6.88	0.06	0.08	24.77	0.1	41.18	-4.8	3.37	1.9	4.9	0.0830482
		1899-12-31 22:51:24	1.43	5.57	-0.18	6.89	0.06	0.08	24.8	0.1	41.87	-5.49	2.7	2	5	0.0831488
		1899-12-31 22:51:24	1.41	6.26	-0.17	6.89	0.06	0.08	24.83	0.1	42.56	-6.18	2.02	2.1	5.1	0.0832495
		1899-12-31 22:51:24	1.4	6.95	-0.16	6.9	0.06	0.08	24.86	0.1	43.25	-6.87	1.35	2.2	5.2	0.0833501
		1899-12-31 22:51:24	1.38	7.64	-0.16	6.91	0.06	0.08	24.89	0.1	43.94	-7.56	0.67	2.3	5.3	0.0834508
		1899-12-31 22:51:24	1.36	8.33	-0.15	6.92	0.06	0.08	24.91	0.1	44.63	-8.25	0	2.4	5.4	0.0556897
21	1899-12-31 21:42:02	GlobalTime	X[m]	Y[m]	Vx[m/s]	Vy[m/s]	Ax[m/s2]	Ay[m/s2]	Speed[km/h]	Acceleration[m/s2]	Space[m]				3
		1899-12-31 21:41:57	2.27	-36.03	-0.25	5.54	0.05	0.01	19.98	0.05	0	36.81	48.37	-5.3	-2.3
		1899-12-31 21:41:57	2.25	-35.47	-0.24	5.54	0.06	0.01	19.98	0.06	0.55	36.26	47.73	-5.2	-2.2	0
		1899-12-31 21:41:57	2.22	-34.92	-0.23	5.55	0.07	0.01	19.98	0.08	1.11	35.7	47.1	-5.1	-2.1	0
		1899-12-31 21:41:57	2.2	-34.36	-0.23	5.55	0.09	0.02	19.99	0.09	1.67	35.14	46.47	-5	-2	0.0275367
		1899-12-31 21:41:57	2.18	-33.81	-0.22	5.55	0.1	0.02	19.99	0.11	2.22	34.59	45.85	-4.9	-1.9	0
		1899-12-31 21:41:58	2.16	-33.25	-0.21	5.55	0.12	0.02	20	0.12	2.78	34.03	45.22	-4.8	-1.8	0.0275504
		1899-12-31 21:41:58	2.14	-32.7	-0.19	5.55	0.13	0.02	20	0.13	3.33	33.48	44.6	-4.7	-1.7	0
		1899-12-31 21:41:58	2.12	-32.14	-0.18	5.56	0.15	0.03	20.01	0.15	3.89	32.92	43.98	-4.6	-1.6	0.0275642
		1899-12-31 21:41:58	2.1	-31.59	-0.16	5.56	0.16	0.03	20.02	0.17	4.44	32.37	43.37	-4.5	-1.5	0.0280794
		1899-12-31 21:41:58	2.09	-31.03	-0.15	5.56	0.18	0.03	20.03	0.18	5	31.81	42.76	-4.4	-1.4	0.0275918
		1899-12-31 21:41:58	2.07	-30.48	-0.13	5.57	0.19	0.04	20.04	0.2	5.56	31.25	42.15	-4.3	-1.3	0.0276055
		1899-12-31 21:41:58	2.06	-29.92	-0.11	5.57	0.21	0.04	20.05	0.21	6.11	30.7	41.54	-4.2	-1.2	0.0281215
		1899-12-31 21:41:58	2.05	-29.36	-0.09	5.57	0.22	0.04	20.06	0.23	6.67	30.14	40.94	-4.1	-1.1	0.0276331
		1899-12-31 21:41:58	2.04	-28.8	-0.07	5.58	0.24	0.05	20.08	0.24	7.23	29.58	40.34	-4	-1	0.0553075
		1899-12-31 21:41:58	2.04	-28.25	-0.04	5.58	0.25	0.05	20.1	0.26	7.79	29.02	39.75	-3.9	-0.9	0.0553627
		1899-12-31 21:41:59	2.03	-27.69	-0.02	5.59	0.26	0.06	20.11	0.27	8.34	28.47	39.15	-3.8	-0.8	0.0282057
		1899-12-31 21:41:59	2.03	-27.13	0.01	5.59	0.28	0.06	20.13	0.28	8.9	27.91	38.56	-3.7	-0.7	0.0554453
		1899-12-31 21:41:59	2.04	-26.57	0.04	5.6	0.29	0.06	20.16	0.29	9.46	27.35	37.98	-3.6	-0.6	0.0832713
		1899-12-31 21:41:59	2.04	-26.01	0.07	5.61	0.3	0.07	20.18	0.3	10.02	26.79	37.39	-3.5	-0.5	0.0555831
		1899-12-31 21:41:59	2.05	-25.45	0.1	5.61	0.3	0.07	20.21	0.31	10.58	26.23	36.81	-3.4	-0.4	0.083478
		1899-12-31 21:41:59	2.06	-24.89	0.13	5.62	0.31	0.08	20.24	0.32	11.15	25.66	36.23	-3.3	-0.3	0.0821353
		1899-12-31 21:41:59	2.08	-24.32	0.16	5.63	0.31	0.08	20.27	0.32	11.71	25.1	35.65	-3.2	-0.2	0.083726
		1899-12-31 21:41:59	2.09	-23.76	0.19	5.64	0.31	0.08	20.3	0.32	12.27	24.54	35.08	-3.1	-0.1	0.08385
		1899-12-31 21:41:59	2.11	-23.2	0.22	5.64	0.31	0.08	20.34	0.32	12.84	23.97	34.5	-3	-4.68958e-13	0.110028					20.34	23.97
		1899-12-31 21:41:59	2.14	-22.63	0.25	5.65	0.31	0.09	20.37	0.32	13.4	23.41	33.93	-2.9	0.1	0.0841394
		1899-12-31 21:42:00	2.16	-22.07	0.28	5.66	0.3	0.09	20.41	0.31	13.97	22.84	33.36	-2.8	0.2	0.110407
		1899-12-31 21:42:00	2.19	-21.5	0.31	5.67	0.29	0.08	20.44	0.3	14.54	22.27	32.79	-2.7	0.3	0.0829475
		1899-12-31 21:42:00	2.23	-20.93	0.34	5.68	0.28	0.08	20.48	0.29	15.1	21.71	32.23	-2.6	0.4	0.112765
		1899-12-31 21:42:00	2.26	-20.36	0.37	5.69	0.26	0.08	20.51	0.28	15.67	21.14	31.66	-2.5	0.5	0.0832318
		1899-12-31 21:42:00	2.3	-19.8	0.4	5.69	0.25	0.07	20.55	0.26	16.24	20.57	31.09	-2.4	0.6	0.111165
		1899-12-31 21:42:00	2.34	-19.23	0.42	5.7	0.22	0.07	20.58	0.23	16.81	20	30.53	-2.3	0.7	0.0835161
		1899-12-31 21:42:00	2.38	-18.66	0.44	5.71	0.2	0.06	20.61	0.21	17.39	19.42	29.96	-2.2	0.8	0.0821959
		1899-12-31 21:42:00	2.43	-18.08	0.46	5.71	0.17	0.05	20.63	0.18	17.96	18.85	29.39	-2.1	0.9	0.0558263
		1899-12-31 21:42:00	2.48	-17.51	0.48	5.72	0.14	0.04	20.65	0.15	18.53	18.28	28.83	-2	1	0.0558804
		1899-12-31 21:42:00	2.52	-16.94	0.49	5.72	0.11	0.03	20.67	0.12	19.11	17.7	28.26	-1.9	1.1	0.0549702
		1899-12-31 21:42:01	2.57	-16.37	0.5	5.72	0.08	0.01	20.68	0.08	19.68	17.13	27.69	-1.8	1.2	0.0279876
		1899-12-31 21:42:01	2.62	-15.8	0.51	5.72	0.05	0	20.69	0.05	20.26	16.55	27.12	-1.7	1.3	0.0275184
		1899-12-31 21:42:01	2.67	-15.22	0.51	5.72	0.01	-0.01	20.69	0.02	20.83	15.98	26.56	-1.6	1.4	0
		1899-12-31 21:42:01	2.73	-14.65	0.51	5.72	-0.02	-0.02	20.68	0.03	21.4	15.41	25.99	-1.5	1.5	-0.0280011
		1899-12-31 21:42:01	2.78	-14.08	0.51	5.72	-0.05	-0.03	20.67	0.06	21.98	14.83	25.42	-1.4	1.6	-0.0275051
		1899-12-31 21:42:01	2.83	-13.51	0.5	5.72	-0.09	-0.04	20.66	0.1	22.55	14.26	24.84	-1.3	1.7	-0.0279741
		1899-12-31 21:42:01	2.88	-12.94	0.49	5.71	-0.12	-0.04	20.64	0.13	23.13	13.68	24.27	-1.2	1.8	-0.0549436
		1899-12-31 21:42:01	2.93	-12.36	0.48	5.71	-0.15	-0.05	20.62	0.16	23.7	13.11	23.7	-1.1	1.9	-0.0558534
		1899-12-31 21:42:01	2.97	-11.79	0.46	5.7	-0.18	-0.06	20.6	0.19	24.27	12.54	23.13	-1	2	-0.0557992
		1899-12-31 21:42:01	3.02	-11.22	0.44	5.7	-0.21	-0.06	20.57	0.22	24.84	11.97	22.55	-0.9	2.1	-0.0835973
		1899-12-31 21:42:02	3.06	-10.65	0.42	5.69	-0.24	-0.06	20.55	0.25	25.42	11.39	21.98	-0.8	2.2	-0.0547041
		1899-12-31 21:42:02	3.1	-10.09	0.4	5.69	-0.26	-0.06	20.52	0.27	25.99	10.82	21.4	-0.7	2.3	-0.0833942
		1899-12-31 21:42:02	3.14	-9.52	0.37	5.68	-0.29	-0.06	20.49	0.29	26.56	10.25	20.83	-0.6	2.4	-0.0832724
		1899-12-31 21:42:02	3.18	-8.95	0.34	5.67	-0.31	-0.05	20.46	0.31	27.12	9.69	20.26	-0.5	2.5	-0.0846354
		1899-12-31 21:42:02	3.21	-8.38	0.31	5.67	-0.32	-0.05	20.44	0.33	27.69	9.12	19.68	-0.4	2.6	-0.055366
		1899-12-31 21:42:02	3.24	-7.82	0.28	5.67	-0.34	-0.04	20.42	0.34	28.26	8.55	19.11	-0.3	2.7	-0.0553119
		1899-12-31 21:42:02	3.26	-7.25	0.24	5.66	-0.35	-0.03	20.4	0.35	28.83	7.98	18.53	-0.2	2.8	-0.0552577
		1899-12-31 21:42:02	3.29	-6.68	0.21	5.66	-0.36	-0.01	20.39	0.36	29.39	7.42	17.96	-0.1	2.9	-0.0281016
		1899-12-31 21:42:02	3.3	-6.12	0.17	5.66	-0.37	0	20.38	0.37	29.96	6.85	17.39	0	3	-0.027595							20.38	6.85
		1899-12-31 21:42:02	3.32	-5.55	0.13	5.66	-0.37	0.02	20.38	0.37	30.53	6.28	16.81	0.1	3.1	0
		1899-12-31 21:42:03	3.33	-4.99	0.1	5.66	-0.37	0.04	20.39	0.38	31.09	5.72	16.24	0.2	3.2	0.0280878
		1899-12-31 21:42:03	3.34	-4.42	0.06	5.67	-0.37	0.06	20.4	0.38	31.66	5.15	15.67	0.3	3.3	0.0276086
		1899-12-31 21:42:03	3.34	-3.85	0.02	5.67	-0.37	0.08	20.43	0.38	32.23	4.58	15.1	0.4	3.4	0.0829069
		1899-12-31 21:42:03	3.34	-3.28	-0.02	5.68	-0.37	0.1	20.46	0.38	32.79	4.02	14.54	0.5	3.5	0.0845114
		1899-12-31 21:42:03	3.34	-2.72	-0.05	5.69	-0.36	0.12	20.5	0.38	33.36	3.45	13.97	0.6	3.6	0.110895
		1899-12-31 21:42:03	3.33	-2.15	-0.09	5.71	-0.36	0.15	20.55	0.39	33.93	2.88	13.4	0.7	3.7	0.138923
		1899-12-31 21:42:03	3.32	-1.57	-0.12	5.72	-0.35	0.17	20.6	0.39	34.5	2.31	12.84	0.8	3.8	0.139261
		1899-12-31 21:42:03	3.31	-1	-0.16	5.74	-0.34	0.19	20.67	0.39	35.08	1.73	12.27	0.9	3.9	0.192163
		1899-12-31 21:42:03	3.29	-0.43	-0.19	5.76	-0.33	0.2	20.74	0.39	35.65	1.16	11.71	1	4	0.196197
		1899-12-31 21:42:03	3.27	0.15	-0.23	5.78	-0.32	0.22	20.82	0.39	36.23	0.58	11.15	1.1	4.1	0.221158
		1899-12-31 21:42:04	3.25	0.73	-0.26	5.8	-0.31	0.23	20.91	0.39	36.81	0	10.58	1.2	4.2	0.24982
		1899-12-31 21:42:04	3.22	1.31	-0.29	5.83	-0.3	0.25	21	0.39	37.39	-0.58	10.02	1.3	4.3	0.250898
		1899-12-31 21:42:04	3.19	1.89	-0.32	5.85	-0.29	0.26	21.09	0.39	37.98	-1.17	9.46	1.4	4.4	0.247705
		1899-12-31 21:42:04	3.15	2.48	-0.35	5.88	-0.28	0.27	21.19	0.39	38.56	-1.75	8.9	1.5	4.5	0.281237
		1899-12-31 21:42:04	3.12	3.07	-0.37	5.9	-0.27	0.28	21.3	0.39	39.15	-2.34	8.34	1.6	4.6	0.305627
		1899-12-31 21:42:04	3.08	3.66	-0.4	5.93	-0.26	0.29	21.4	0.38	39.75	-2.94	7.79	1.7	4.7	0.274563
		1899-12-31 21:42:04	3.04	4.26	-0.42	5.96	-0.25	0.29	21.51	0.38	40.34	-3.53	7.23	1.8	4.8	0.308649
		1899-12-31 21:42:04	2.99	4.85	-0.45	5.99	-0.24	0.29	21.62	0.38	40.94	-4.13	6.67	1.9	4.9	0.30506
		1899-12-31 21:42:04	2.95	5.45	-0.47	6.02	-0.23	0.29	21.74	0.37	41.54	-4.73	6.11	2	5	0.334568
		1899-12-31 21:42:04	2.9	6.06	-0.5	6.05	-0.22	0.29	21.85	0.37	42.15	-5.34	5.56	2.1	5.1	0.30326
		1899-12-31 21:42:05	2.85	6.66	-0.52	6.08	-0.21	0.29	21.96	0.36	42.76	-5.95	5	2.2	5.2	0.30479
		1899-12-31 21:42:05	2.8	7.27	-0.54	6.11	-0.21	0.29	22.07	0.36	43.37	-6.56	4.44	2.3	5.3	0.306321
		1899-12-31 21:42:05	2.74	7.89	-0.56	6.14	-0.21	0.29	22.18	0.35	43.98	-7.17	3.89	2.4	5.4	0.307851
		1899-12-31 21:42:05	2.69	8.5	-0.58	6.16	-0.2	0.28	22.29	0.35	44.6	-7.79	3.33	2.5	5.5	0.304392
		1899-12-31 21:42:05	2.63	9.12	-0.6	6.19	-0.2	0.28	22.4	0.34	45.22	-8.41	2.78	2.6	5.6	0.305898
		1899-12-31 21:42:05	2.57	9.74	-0.62	6.22	-0.2	0.28	22.5	0.34	45.85	-9.04	2.22	2.7	5.7	0.274961
		1899-12-31 21:42:05	2.5	10.36	-0.64	6.25	-0.2	0.28	22.61	0.34	46.47	-9.66	1.67	2.8	5.8	0.308773
		1899-12-31 21:42:05	2.44	10.99	-0.66	6.28	-0.2	0.28	22.72	0.34	47.1	-10.29	1.11	2.9	5.9	0.305353
		1899-12-31 21:42:05	2.37	11.62	-0.68	6.3	-0.2	0.28	22.82	0.34	47.73	-10.92	0.55	3	6	0.27888
		1899-12-31 21:42:05	2.3	12.25	-0.7	6.33	-0.2	0.28	22.93	0.34	48.37	-11.56	0	3.1	6.1	0.303367
22	1899-12-31 21:42:02	GlobalTime	X[m]	Y[m]	Vx[m/s]	Vy[m/s]	Ax[m/s2]	Ay[m/s2]	Speed[km/h]	Acceleration[m/s2]	Space[m]				3
		1899-12-31 21:42:02	2.31	-36.09	-0.12	10.07	0.06	0.06	36.25	0.08	0	36.37	43.87	0.13	3.13
		1899-12-31 21:42:03	2.29	-35.08	-0.12	10.07	0.07	0.07	36.27	0.1	1.01	35.36	42.8	0.23	3.23	0.0554028
		1899-12-31 21:42:03	2.28	-34.08	-0.11	10.08	0.09	0.09	36.3	0.13	2.02	34.35	41.73	0.33	3.33	0.0831614
		1899-12-31 21:42:03	2.27	-33.07	-0.1	10.09	0.11	0.11	36.33	0.15	3.02	33.35	40.66	0.43	3.43	0.0840625
		1899-12-31 21:42:03	2.26	-32.06	-0.09	10.1	0.12	0.12	36.37	0.17	4.03	32.34	39.59	0.53	3.53	0.111081
		1899-12-31 21:42:03	2.25	-31.05	-0.08	10.12	0.14	0.14	36.42	0.19	5.04	31.33	38.51	0.63	3.63	0.139023
		1899-12-31 21:42:03	2.25	-30.03	-0.06	10.13	0.15	0.15	36.47	0.21	6.06	30.31	37.44	0.73	3.73	0.137849
		1899-12-31 21:42:03	2.24	-29.02	-0.05	10.15	0.16	0.17	36.53	0.23	7.07	29.3	36.37	0.83	3.83	0.167308
		1899-12-31 21:42:03	2.24	-28	-0.03	10.16	0.17	0.18	36.59	0.25	8.09	28.28	35.3	0.93	3.93	0.16594
		1899-12-31 21:42:03	2.24	-26.99	-0.01	10.18	0.18	0.19	36.65	0.26	9.1	27.27	34.23	1.03	4.03	0.167858
		1899-12-31 21:42:03	2.24	-25.97	0.01	10.2	0.19	0.2	36.72	0.28	10.12	26.25	33.16	1.13	4.13	0.194259
		1899-12-31 21:42:04	2.24	-24.95	0.03	10.22	0.2	0.22	36.8	0.29	11.14	25.23	32.09	1.23	4.23	0.222464
		1899-12-31 21:42:04	2.24	-23.92	0.05	10.24	0.2	0.23	36.88	0.3	12.17	24.2	31.02	1.33	4.33	0.220784
		1899-12-31 21:42:04	2.25	-22.9	0.07	10.27	0.2	0.24	36.96	0.31	13.19	23.18	29.95	1.43	4.43	0.223433
		1899-12-31 21:42:04	2.25	-21.87	0.09	10.29	0.21	0.25	37.05	0.32	14.22	22.15	28.89	1.53	4.53	0.249494
		1899-12-31 21:42:04	2.26	-20.84	0.11	10.32	0.21	0.26	37.14	0.33	15.25	21.12	27.82	1.63	4.63	0.250101
		1899-12-31 21:42:04	2.28	-19.81	0.13	10.34	0.21	0.27	37.23	0.34	16.28	20.09	26.76	1.73	4.73	0.250708
		1899-12-31 21:42:04	2.29	-18.77	0.15	10.37	0.2	0.27	37.33	0.34	17.32	19.05	25.7	1.83	4.83	0.276591
		1899-12-31 21:42:04	2.31	-17.73	0.17	10.4	0.2	0.27	37.43	0.34	18.36	18.01	24.65	1.93	4.93	0.277333
		1899-12-31 21:42:04	2.32	-16.69	0.19	10.42	0.19	0.28	37.53	0.34	19.4	16.97	23.59	2.03	5.03	0.278075
		1899-12-31 21:42:04	2.34	-15.65	0.21	10.45	0.19	0.27	37.63	0.33	20.44	15.93	22.54	2.13	5.13	0.278816
		1899-12-31 21:42:05	2.36	-14.6	0.23	10.48	0.18	0.27	37.73	0.32	21.49	14.88	21.49	2.23	5.23	0.276896
		1899-12-31 21:42:05	2.39	-13.55	0.24	10.5	0.18	0.26	37.83	0.31	22.54	13.83	20.44	2.33	5.33	0.277631
		1899-12-31 21:42:05	2.41	-12.5	0.26	10.53	0.17	0.25	37.92	0.3	23.59	12.78	19.4	2.43	5.43	0.250496
		1899-12-31 21:42:05	2.44	-11.45	0.28	10.56	0.16	0.24	38.01	0.29	24.65	11.72	18.36	2.53	5.53	0.248722
		1899-12-31 21:42:05	2.47	-10.39	0.29	10.58	0.16	0.23	38.1	0.27	25.7	10.67	17.32	2.63	5.63	0.251687
		1899-12-31 21:42:05	2.5	-9.33	0.31	10.6	0.15	0.21	38.18	0.26	26.76	9.61	16.28	2.73	5.73	0.222106
		1899-12-31 21:42:05	2.53	-8.27	0.32	10.62	0.14	0.19	38.25	0.24	27.82	8.55	15.25	2.83	5.83	0.194725
		1899-12-31 21:42:05	2.56	-7.21	0.34	10.64	0.14	0.17	38.32	0.22	28.89	7.48	14.22	2.93	5.93	0.193258
		1899-12-31 21:42:05	2.6	-6.14	0.35	10.66	0.14	0.15	38.38	0.2	29.95	6.42	13.19	3.03	6.03	0.167497
		1899-12-31 21:42:05	2.63	-5.08	0.37	10.67	0.13	0.13	38.43	0.18	31.02	5.35	12.17	3.13	6.13	0.138474
		1899-12-31 21:42:06	2.67	-4.01	0.38	10.68	0.13	0.1	38.48	0.17	32.09	4.28	11.14	3.23	6.23	0.138655
		1899-12-31 21:42:06	2.71	-2.94	0.39	10.69	0.13	0.08	38.52	0.15	33.16	3.21	10.12	3.33	6.33	0.111053
		1899-12-31 21:42:06	2.75	-1.87	0.4	10.7	0.13	0.06	38.54	0.14	34.23	2.14	9.1	3.43	6.43	0.05557
		1899-12-31 21:42:06	2.79	-0.8	0.42	10.7	0.12	0.04	38.56	0.13	35.3	1.07	8.09	3.53	6.53	0.0555988
		1899-12-31 21:42:06	2.83	0.27	0.43	10.71	0.12	0.02	38.58	0.13	36.37	0	7.07	3.63	6.63	0.0556277
		1899-12-31 21:42:06	2.88	1.34	0.44	10.71	0.12	0.01	38.59	0.12	37.44	-1.07	6.06	3.73	6.73	0.0278247
		1899-12-31 21:42:06	2.92	2.41	0.45	10.71	0.12	0	38.59	0.12	38.51	-2.14	5.04	3.83	6.83	0
		1899-12-31 21:42:06	2.97	3.48	0.47	10.71	0.12	-0.01	38.59	0.12	39.59	-3.22	4.03	3.93	6.93	0
		1899-12-31 21:42:06	3.01	4.55	0.48	10.71	0.12	-0.01	38.59	0.12	40.66	-4.29	3.02	4.03	7.03	0
		1899-12-31 21:42:06	3.06	5.62	0.49	10.71	0.12	-0.01	38.59	0.12	41.73	-5.36	2.02	4.13	7.13	0
		1899-12-31 21:42:07	3.11	6.7	0.5	10.71	0.12	-0.01	38.59	0.12	42.8	-6.43	1.01	4.23	7.23	0
		1899-12-31 21:42:07	3.16	7.77	0.52	10.71	0.12	-0.01	38.58	0.12	43.87	-7.5	0	4.33	7.33	-0.0278247
23	1899-12-31 18:52:03	GlobalTime	X[m]	Y[m]	Vx[m/s]	Vy[m/s]	Ax[m/s2]	Ay[m/s2]	Speed[km/h]	Acceleration[m/s2]	Space[m]				3
		1899-12-31 18:51:56	1.88	-36.31	-0.05	6.4	0.02	0.02	23.06	0.03	0	36.76	39.24	-6.74	-3.74
		1899-12-31 18:51:56	1.87	-35.67	-0.05	6.41	0.03	0.03	23.07	0.04	0.64	36.12	38.63	-6.64	-3.64	0.0278079
		1899-12-31 18:51:56	1.87	-35.03	-0.05	6.41	0.04	0.04	23.08	0.05	1.28	35.48	38.01	-6.54	-3.54	0.02782
		1899-12-31 18:51:56	1.86	-34.38	-0.04	6.41	0.05	0.04	23.09	0.06	1.92	34.84	37.39	-6.44	-3.44	0.027832
		1899-12-31 18:51:56	1.86	-33.74	-0.04	6.42	0.05	0.05	23.11	0.07	2.56	34.2	36.76	-6.34	-3.34	0.0557002
		1899-12-31 18:51:56	1.85	-33.1	-0.03	6.42	0.06	0.06	23.13	0.08	3.21	33.55	36.13	-6.24	-3.24	0.0548908
		1899-12-31 18:51:56	1.85	-32.46	-0.03	6.43	0.07	0.06	23.15	0.09	3.85	32.91	35.5	-6.14	-3.14	0.0557967
		1899-12-31 18:51:56	1.85	-31.81	-0.02	6.44	0.07	0.07	23.17	0.1	4.49	32.27	34.87	-6.04	-3.04	0.0558449
		1899-12-31 18:51:57	1.85	-31.17	-0.01	6.44	0.08	0.07	23.2	0.11	5.14	31.62	34.23	-5.94	-2.94	0.0825677
		1899-12-31 18:51:57	1.85	-30.53	-0.01	6.45	0.08	0.08	23.22	0.11	5.78	30.98	33.58	-5.84	-2.84	0.0559655
		1899-12-31 18:51:57	1.85	-29.88	0	6.46	0.09	0.08	23.25	0.12	6.43	30.33	32.94	-5.74	-2.74	0.0827457
		1899-12-31 18:51:57	1.85	-29.23	0.01	6.47	0.09	0.09	23.28	0.13	7.07	29.69	32.29	-5.64	-2.64	0.0841471
		1899-12-31 18:51:57	1.85	-28.59	0.02	6.48	0.09	0.1	23.32	0.13	7.72	29.04	31.63	-5.54	-2.54	0.110636
		1899-12-31 18:51:57	1.85	-27.94	0.03	6.49	0.09	0.1	23.35	0.14	8.37	28.39	30.98	-5.44	-2.44	0.0831019
		1899-12-31 18:51:57	1.85	-27.29	0.04	6.5	0.09	0.11	23.39	0.14	9.02	27.74	30.32	-5.34	-2.34	0.110969
		1899-12-31 18:51:57	1.86	-26.64	0.05	6.51	0.09	0.12	23.43	0.15	9.67	27.09	29.66	-5.24	-2.24	0.111159
		1899-12-31 18:51:57	1.86	-25.99	0.06	6.52	0.09	0.12	23.47	0.15	10.32	26.44	29	-5.14	-2.14	0.111349
		1899-12-31 18:51:57	1.87	-25.34	0.06	6.53	0.08	0.13	23.52	0.15	10.97	25.79	28.33	-5.04	-2.04	0.139453
		1899-12-31 18:51:58	1.88	-24.68	0.07	6.55	0.08	0.14	23.57	0.16	11.63	25.13	27.66	-4.94	-1.94	0.137632
		1899-12-31 18:51:58	1.88	-24.03	0.08	6.56	0.07	0.14	23.62	0.16	12.28	24.48	26.99	-4.84	-1.84	0.140046
		1899-12-31 18:51:58	1.89	-23.37	0.09	6.57	0.07	0.14	23.67	0.16	12.94	23.82	26.32	-4.74	-1.74	0.138217
		1899-12-31 18:51:58	1.9	-22.71	0.09	6.59	0.06	0.15	23.72	0.16	13.6	23.16	25.65	-4.64	-1.64	0.138509
		1899-12-31 18:51:58	1.91	-22.05	0.1	6.6	0.06	0.15	23.77	0.16	14.26	22.5	24.97	-4.54	-1.54	0.138801
		1899-12-31 18:51:58	1.92	-21.39	0.11	6.62	0.05	0.15	23.83	0.16	14.92	21.84	24.3	-4.44	-1.44	0.166947
		1899-12-31 18:51:58	1.93	-20.73	0.11	6.63	0.04	0.15	23.88	0.15	15.58	21.18	23.63	-4.34	-1.34	0.139444
		1899-12-31 18:51:58	1.94	-20.06	0.11	6.65	0.04	0.14	23.93	0.15	16.24	20.52	22.95	-4.24	-1.24	0.139736
		1899-12-31 18:51:58	1.96	-19.4	0.12	6.66	0.03	0.14	23.99	0.14	16.91	19.85	22.28	-4.14	-1.14	0.165561
		1899-12-31 18:51:58	1.97	-18.73	0.12	6.68	0.02	0.13	24.04	0.14	17.58	19.18	21.6	-4.04	-1.04	0.138284
		1899-12-31 18:51:59	1.98	-18.06	0.12	6.69	0.02	0.13	24.08	0.13	18.24	18.52	20.93	-3.94	-0.94	0.112514
		1899-12-31 18:51:59	1.99	-17.39	0.12	6.7	0.01	0.12	24.13	0.12	18.91	17.85	20.26	-3.84	-0.84	0.138803
		1899-12-31 18:51:59	2	-16.72	0.13	6.71	0	0.1	24.17	0.1	19.58	17.18	19.58	-3.74	-0.74	0.111249
		1899-12-31 18:51:59	2.02	-16.05	0.13	6.72	0	0.09	24.2	0.09	20.26	16.5	18.91	-3.64	-0.64	0.0823291
		1899-12-31 18:51:59	2.03	-15.38	0.13	6.73	-0.01	0.07	24.23	0.07	20.93	15.83	18.24	-3.54	-0.54	0.0836616
		1899-12-31 18:51:59	2.04	-14.71	0.12	6.74	-0.01	0.05	24.26	0.05	21.6	15.16	17.58	-3.44	-0.44	0.0837652
		1899-12-31 18:51:59	2.05	-14.03	0.12	6.74	-0.01	0.03	24.27	0.04	22.28	14.48	16.91	-3.34	-0.34	0.0275338
		1899-12-31 18:51:59	2.07	-13.36	0.12	6.74	-0.02	0.01	24.28	0.02	22.95	13.81	16.24	-3.24	-0.24	0.0279563
		1899-12-31 18:51:59	2.08	-12.68	0.12	6.74	-0.02	-0.01	24.28	0.02	23.63	13.13	15.58	-3.14	-0.14	0
		1899-12-31 18:51:59	2.09	-12.01	0.12	6.74	-0.02	-0.04	24.28	0.05	24.3	12.46	14.92	-3.04	-0.04	0					24.28	12.46
		1899-12-31 18:52:00	2.1	-11.33	0.12	6.74	-0.02	-0.07	24.26	0.07	24.97	11.79	14.26	-2.94	0.06	-0.0559011
		1899-12-31 18:52:00	2.11	-10.66	0.11	6.73	-0.02	-0.1	24.23	0.1	25.65	11.11	13.6	-2.84	0.16	-0.0825334
		1899-12-31 18:52:00	2.13	-9.99	0.11	6.72	-0.03	-0.13	24.19	0.13	26.32	10.44	12.94	-2.74	0.26	-0.111526
		1899-12-31 18:52:00	2.14	-9.32	0.11	6.71	-0.03	-0.15	24.14	0.16	26.99	9.77	12.28	-2.64	0.36	-0.139148
		1899-12-31 18:52:00	2.15	-8.65	0.11	6.69	-0.03	-0.18	24.08	0.18	27.66	9.1	11.63	-2.54	0.46	-0.166598
		1899-12-31 18:52:00	2.16	-7.98	0.1	6.67	-0.03	-0.21	24.01	0.21	28.33	8.43	10.97	-2.44	0.56	-0.19384
		1899-12-31 18:52:00	2.17	-7.31	0.1	6.65	-0.03	-0.23	23.94	0.23	29	7.76	10.32	-2.34	0.66	-0.193276
		1899-12-31 18:52:00	2.18	-6.65	0.1	6.62	-0.04	-0.25	23.85	0.25	29.66	7.1	9.67	-2.24	0.76	-0.25142
		1899-12-31 18:52:00	2.19	-5.99	0.09	6.6	-0.04	-0.27	23.76	0.27	30.32	6.44	9.02	-2.14	0.86	-0.250473
		1899-12-31 18:52:00	2.2	-5.33	0.09	6.57	-0.04	-0.29	23.66	0.29	30.98	5.78	8.37	-2.04	0.96	-0.277193
		1899-12-31 18:52:01	2.2	-4.68	0.09	6.54	-0.04	-0.3	23.55	0.31	31.63	5.13	7.72	-1.94	1.06	-0.308232
		1899-12-31 18:52:01	2.21	-4.02	0.08	6.51	-0.05	-0.32	23.44	0.32	32.29	4.47	7.07	-1.84	1.16	-0.302148
		1899-12-31 18:52:01	2.22	-3.37	0.08	6.48	-0.05	-0.33	23.32	0.33	32.94	3.82	6.43	-1.74	1.26	-0.333048
		1899-12-31 18:52:01	2.23	-2.73	0.07	6.45	-0.05	-0.34	23.2	0.34	33.58	3.18	5.78	-1.64	1.36	-0.336516
		1899-12-31 18:52:01	2.24	-2.08	0.07	6.41	-0.05	-0.34	23.08	0.35	34.23	2.53	5.14	-1.54	1.46	-0.32963
		1899-12-31 18:52:01	2.24	-1.44	0.06	6.38	-0.06	-0.35	22.96	0.35	34.87	1.89	4.49	-1.44	1.56	-0.333044
		1899-12-31 18:52:01	2.25	-0.81	0.05	6.34	-0.06	-0.35	22.83	0.36	35.5	1.26	3.85	-1.34	1.66	-0.364534
		1899-12-31 18:52:01	2.25	-0.18	0.05	6.31	-0.06	-0.36	22.7	0.36	36.13	0.63	3.21	-1.24	1.76	-0.362464
		1899-12-31 18:52:01	2.26	0.45	0.04	6.27	-0.06	-0.36	22.57	0.36	36.76	0	2.56	-1.14	1.86	-0.360395
		1899-12-31 18:52:01	2.26	1.08	0.04	6.23	-0.06	-0.36	22.44	0.37	37.39	-0.63	1.92	-1.04	1.96	-0.358325
		1899-12-31 18:52:02	2.26	1.7	0.03	6.2	-0.06	-0.36	22.31	0.37	38.01	-1.25	1.28	-0.94	2.06	-0.362001
		1899-12-31 18:52:02	2.27	2.32	0.02	6.16	-0.06	-0.36	22.18	0.37	38.63	-1.87	0.64	-0.84	2.16	-0.359898
		1899-12-31 18:52:02	2.27	2.93	0.02	6.13	-0.06	-0.36	22.05	0.37	39.24	-2.48	0	-0.74	2.26	-0.36366							22.05	-2.48
24	1899-12-31 18:52:03	GlobalTime	X[m]	Y[m]	Vx[m/s]	Vy[m/s]	Ax[m/s2]	Ay[m/s2]	Speed[km/h]	Acceleration[m/s2]	Space[m]				3
		1899-12-31 18:52:04	1.35	-36.39	0.09	7.92	-0.01	0.24	28.53	0.24	0	34.04	34.04	1.16	4.16
		1899-12-31 18:52:04	1.36	-35.59	0.09	7.95	-0.01	0.32	28.62	0.32	0.79	33.25	32.91	1.26	4.26	0.251187
		1899-12-31 18:52:04	1.37	-34.8	0.09	7.98	-0.01	0.39	28.75	0.39	1.59	32.45	31.78	1.36	4.36	0.359669
		1899-12-31 18:52:04	1.38	-34	0.08	8.03	-0.01	0.46	28.9	0.46	2.39	31.65	30.67	1.46	4.46	0.417028
		1899-12-31 18:52:04	1.39	-33.19	0.08	8.07	-0.01	0.53	29.07	0.53	3.2	30.84	29.56	1.56	4.56	0.469388
		1899-12-31 18:52:04	1.4	-32.38	0.08	8.13	-0.02	0.6	29.27	0.6	4.01	30.03	28.47	1.66	4.66	0.555746
		1899-12-31 18:52:04	1.4	-31.56	0.08	8.19	-0.02	0.67	29.49	0.67	4.82	29.22	27.39	1.76	4.76	0.615722
		1899-12-31 18:52:04	1.41	-30.74	0.08	8.26	-0.02	0.74	29.74	0.74	5.65	28.39	26.32	1.86	4.86	0.688286
		1899-12-31 18:52:04	1.42	-29.91	0.08	8.34	-0.03	0.8	30.02	0.8	6.47	27.57	25.26	1.96	4.96	0.787263
		1899-12-31 18:52:05	1.43	-29.07	0.07	8.42	-0.03	0.86	30.31	0.86	7.31	26.73	24.21	2.06	5.06	0.803558
		1899-12-31 18:52:05	1.43	-28.23	0.07	8.51	-0.04	0.92	30.63	0.92	8.16	25.88	23.17	2.16	5.16	0.885113
		1899-12-31 18:52:05	1.44	-27.37	0.07	8.6	-0.04	0.97	30.96	0.97	9.01	25.03	22.15	2.26	5.26	0.922508
		1899-12-31 18:52:05	1.45	-26.51	0.06	8.7	-0.04	1.02	31.32	1.02	9.88	24.16	21.13	2.36	5.36	0.994253
		1899-12-31 18:52:05	1.45	-25.63	0.06	8.8	-0.05	1.06	31.69	1.06	10.75	23.29	20.13	2.46	5.46	1.03385
		1899-12-31 18:52:05	1.46	-24.75	0.05	8.91	-0.05	1.1	32.08	1.1	11.64	22.4	19.14	2.56	5.56	1.07809
		1899-12-31 18:52:05	1.46	-23.85	0.05	9.02	-0.05	1.13	32.48	1.13	12.54	21.5	18.16	2.66	5.66	1.107
		1899-12-31 18:52:05	1.47	-22.94	0.04	9.13	-0.05	1.16	32.89	1.16	13.44	20.6	17.19	2.76	5.76	1.14891
		1899-12-31 18:52:05	1.47	-22.02	0.04	9.25	-0.04	1.18	33.3	1.18	14.36	19.68	16.24	2.86	5.86	1.13803
		1899-12-31 18:52:05	1.47	-21.09	0.03	9.37	-0.04	1.19	33.73	1.19	15.29	18.75	15.29	2.96	5.96	1.19569
		1899-12-31 18:52:06	1.48	-20.15	0.03	9.49	-0.03	1.2	34.16	1.2	16.24	17.8	14.36	3.06	6.06	1.18554
		1899-12-31 18:52:06	1.48	-19.19	0.03	9.61	-0.02	1.2	34.59	1.2	17.19	16.85	13.44	3.16	6.16	1.20056
		1899-12-31 18:52:06	1.48	-18.23	0.03	9.73	-0.02	1.2	35.03	1.2	18.16	15.88	12.54	3.26	6.26	1.21837
		1899-12-31 18:52:06	1.49	-17.25	0.02	9.85	-0.01	1.19	35.46	1.19	19.14	14.9	11.64	3.36	6.36	1.19326
		1899-12-31 18:52:06	1.49	-16.26	0.02	9.97	0	1.18	35.89	1.18	20.13	13.91	10.75	3.46	6.46	1.19562
		1899-12-31 18:52:06	1.49	-15.25	0.02	10.09	0.01	1.17	36.31	1.17	21.13	12.91	9.88	3.56	6.56	1.16991
		1899-12-31 18:52:06	1.49	-14.24	0.03	10.2	0.02	1.16	36.73	1.16	22.15	11.89	9.01	3.66	6.66	1.16031
		1899-12-31 18:52:06	1.5	-13.21	0.03	10.32	0.03	1.14	37.14	1.14	23.17	10.87	8.16	3.76	6.76	1.14556
		1899-12-31 18:52:06	1.5	-12.18	0.03	10.43	0.04	1.12	37.55	1.12	24.21	9.83	7.31	3.86	6.86	1.136
		1899-12-31 18:52:06	1.5	-11.13	0.04	10.54	0.05	1.11	37.96	1.11	25.26	8.78	6.47	3.96	6.96	1.13753
		1899-12-31 18:52:07	1.51	-10.07	0.04	10.65	0.06	1.09	38.35	1.1	26.32	7.72	5.65	4.06	7.06	1.08319
		1899-12-31 18:52:07	1.51	-9	0.05	10.76	0.06	1.08	38.75	1.08	27.39	6.65	4.82	4.16	7.16	1.11198
		1899-12-31 18:52:07	1.52	-7.92	0.06	10.87	0.07	1.07	39.13	1.08	28.47	5.57	4.01	4.26	7.26	1.05718
		1899-12-31 18:52:07	1.52	-6.82	0.06	10.98	0.07	1.07	39.52	1.07	29.56	4.48	3.2	4.36	7.36	1.08568
		1899-12-31 18:52:07	1.53	-5.72	0.07	11.08	0.07	1.07	39.91	1.07	30.67	3.37	2.39	4.46	7.46	1.07669
		1899-12-31 18:52:07	1.54	-4.61	0.08	11.19	0.07	1.06	40.29	1.07	31.78	2.26	1.59	4.56	7.56	1.05925
		1899-12-31 18:52:07	1.54	-3.48	0.08	11.3	0.07	1.06	40.67	1.07	32.91	1.13	0.79	4.66	7.66	1.05037
		1899-12-31 18:52:07	1.55	-2.35	0.09	11.4	0.07	1.06	41.06	1.07	34.04	0	0	4.76	7.76	1.08826
25	1899-12-31 19:01:40	GlobalTime	X[m]	Y[m]	Vx[m/s]	Vy[m/s]	Ax[m/s2]	Ay[m/s2]	Speed[km/h]	Acceleration[m/s2]	Space[m]				3
		1899-12-31 19:01:36	1.39	-36.23	0.18	10.12	-0.01	0.16	36.42	0.16	0	37.15	38.34	-3.2	-0.2
		1899-12-31 19:01:36	1.41	-35.21	0.18	10.13	-0.02	0.21	36.49	0.21	1.01	36.14	37.15	-3.1	-0.1	0.194952
		1899-12-31 19:01:37	1.42	-34.2	0.18	10.16	-0.02	0.26	36.57	0.26	2.03	35.12	35.97	-3	9.12337e-12	0.221072					36.57	35.12
		1899-12-31 19:01:37	1.44	-33.18	0.18	10.18	-0.02	0.31	36.67	0.31	3.04	34.11	34.79	-2.9	0.1	0.279764
		1899-12-31 19:01:37	1.46	-32.16	0.18	10.22	-0.02	0.35	36.79	0.35	4.06	33.09	33.62	-2.8	0.2	0.333424
		1899-12-31 19:01:37	1.48	-31.14	0.17	10.25	-0.03	0.4	36.92	0.4	5.09	32.06	32.45	-2.7	0.3	0.35892
		1899-12-31 19:01:37	1.49	-30.11	0.17	10.29	-0.03	0.44	37.07	0.44	6.12	31.03	31.29	-2.6	0.4	0.415712
		1899-12-31 19:01:37	1.51	-29.08	0.17	10.34	-0.03	0.47	37.23	0.47	7.15	30	30.13	-2.5	0.5	0.445283
		1899-12-31 19:01:37	1.53	-28.04	0.17	10.39	-0.03	0.5	37.4	0.51	8.18	28.97	28.98	-2.4	0.6	0.475215
		1899-12-31 19:01:37	1.54	-27	0.16	10.44	-0.03	0.53	37.59	0.53	9.23	27.92	27.83	-2.3	0.7	0.523519
		1899-12-31 19:01:37	1.56	-25.96	0.16	10.49	-0.02	0.56	37.78	0.56	10.27	26.88	26.69	-2.2	0.8	0.531231
		1899-12-31 19:01:37	1.58	-24.9	0.16	10.55	-0.02	0.58	37.98	0.58	11.32	25.83	25.55	-2.1	0.9	0.556731
		1899-12-31 19:01:38	1.59	-23.85	0.16	10.61	-0.01	0.59	38.19	0.59	12.38	24.77	24.42	-2	1	0.582187
		1899-12-31 19:01:38	1.61	-22.78	0.16	10.67	-0.01	0.6	38.41	0.6	13.45	23.7	23.3	-1.9	1.1	0.607621
		1899-12-31 19:01:38	1.62	-21.71	0.15	10.73	0	0.61	38.63	0.61	14.52	22.63	22.18	-1.8	1.2	0.611111
		1899-12-31 19:01:38	1.64	-20.64	0.16	10.79	0.01	0.62	38.85	0.62	15.59	21.56	21.07	-1.7	1.3	0.614601
		1899-12-31 19:01:38	1.65	-19.55	0.16	10.85	0.01	0.62	39.07	0.62	16.67	20.48	19.96	-1.6	1.4	0.612369
		1899-12-31 19:01:38	1.67	-18.47	0.16	10.91	0.02	0.62	39.29	0.62	17.76	19.39	18.86	-1.5	1.5	0.610177
		1899-12-31 19:01:38	1.69	-17.37	0.16	10.98	0.03	0.62	39.52	0.62	18.86	18.29	17.76	-1.4	1.6	0.635743
		1899-12-31 19:01:38	1.7	-16.27	0.16	11.04	0.04	0.61	39.74	0.61	19.96	17.19	16.67	-1.3	1.7	0.611574
		1899-12-31 19:01:38	1.72	-15.16	0.17	11.1	0.05	0.6	39.96	0.61	21.07	16.08	15.59	-1.2	1.8	0.609429
		1899-12-31 19:01:38	1.74	-14.05	0.17	11.16	0.06	0.59	40.17	0.6	22.18	14.97	14.52	-1.1	1.9	0.584866
		1899-12-31 19:01:39	1.75	-12.93	0.18	11.22	0.07	0.58	40.39	0.59	23.3	13.85	13.45	-1	2	0.610505
		1899-12-31 19:01:39	1.77	-11.81	0.19	11.27	0.07	0.57	40.6	0.58	24.42	12.73	12.38	-0.9	2.1	0.585865
		1899-12-31 19:01:39	1.79	-10.68	0.19	11.33	0.08	0.56	40.8	0.56	25.55	11.6	11.32	-0.8	2.2	0.555829
		1899-12-31 19:01:39	1.81	-9.54	0.2	11.39	0.08	0.55	41	0.55	26.69	10.46	10.27	-0.7	2.3	0.55366
		1899-12-31 19:01:39	1.83	-8.4	0.21	11.44	0.09	0.54	41.2	0.54	27.83	9.32	9.23	-0.6	2.4	0.556368
		1899-12-31 19:01:39	1.85	-7.25	0.22	11.49	0.09	0.53	41.39	0.53	28.98	8.17	8.18	-0.5	2.5	0.526439
		1899-12-31 19:01:39	1.88	-6.1	0.23	11.55	0.09	0.52	41.58	0.53	30.13	7.02	7.15	-0.4	2.6	0.528861
		1899-12-31 19:01:39	1.9	-4.94	0.24	11.6	0.09	0.51	41.76	0.52	31.29	5.86	6.12	-0.3	2.7	0.498922
		1899-12-31 19:01:39	1.92	-3.78	0.25	11.65	0.09	0.51	41.95	0.51	32.45	4.7	5.09	-0.2	2.8	0.528978
		1899-12-31 19:01:39	1.95	-2.61	0.26	11.7	0.09	0.5	42.13	0.51	33.62	3.53	4.06	-0.1	2.9	0.49905
		1899-12-31 19:01:40	1.97	-1.44	0.27	11.75	0.09	0.5	42.31	0.51	34.79	2.36	3.04	0	3	0.501187							42.31	2.36
		1899-12-31 19:01:40	2	-0.26	0.28	11.8	0.09	0.5	42.49	0.51	35.97	1.18	2.03	0.1	3.1	0.499058
		1899-12-31 19:01:40	2.03	0.92	0.29	11.85	0.09	0.5	42.67	0.51	37.15	0	1.01	0.2	3.2	0.501177
		1899-12-31 19:01:40	2.06	2.11	0.29	11.9	0.09	0.5	42.85	0.51	38.34	-1.19	0	0.3	3.3	0.499066
26	1899-12-31 19:08:22	GlobalTime	X[m]	Y[m]	Vx[m/s]	Vy[m/s]	Ax[m/s2]	Ay[m/s2]	Speed[km/h]	Acceleration[m/s2]	Space[m]				3
		1899-12-31 19:08:17	2.6	-35.99	-0.13	11.05	0.01	-0.23	39.79	0.23	0	36.82	38.09	-4.64	-1.64
		1899-12-31 19:08:17	2.59	-34.89	-0.13	11.03	0.01	-0.3	39.7	0.3	1.1	35.72	37.46	-4.54	-1.54	-0.250915
		1899-12-31 19:08:17	2.58	-33.79	-0.13	11	0.02	-0.37	39.59	0.37	2.21	34.61	36.82	-4.44	-1.44	-0.303147
		1899-12-31 19:08:17	2.56	-32.69	-0.13	10.96	0.02	-0.43	39.45	0.43	3.3	33.52	36.16	-4.34	-1.34	-0.391664
		1899-12-31 19:08:17	2.55	-31.59	-0.13	10.91	0.02	-0.5	39.28	0.5	4.4	32.42	35.49	-4.24	-1.24	-0.46942
		1899-12-31 19:08:17	2.54	-30.51	-0.12	10.86	0.02	-0.56	39.1	0.56	5.49	31.33	34.8	-4.14	-1.14	-0.499363
		1899-12-31 19:08:17	2.53	-29.42	-0.12	10.8	0.03	-0.63	38.89	0.63	6.57	30.25	34.1	-4.04	-1.04	-0.585059
		1899-12-31 19:08:18	2.51	-28.35	-0.12	10.74	0.03	-0.69	38.65	0.69	7.65	29.17	33.38	-3.94	-0.94	-0.664781
		1899-12-31 19:08:18	2.5	-27.28	-0.12	10.67	0.03	-0.75	38.4	0.75	8.72	28.1	32.65	-3.84	-0.84	-0.694535
		1899-12-31 19:08:18	2.49	-26.21	-0.11	10.59	0.04	-0.8	38.12	0.8	9.78	27.04	31.9	-3.74	-0.74	-0.779816
		1899-12-31 19:08:18	2.48	-25.16	-0.11	10.51	0.04	-0.86	37.83	0.86	10.83	25.99	31.14	-3.64	-0.64	-0.809285
		1899-12-31 19:08:18	2.47	-24.11	-0.1	10.42	0.04	-0.91	37.51	0.91	11.88	24.94	30.36	-3.54	-0.54	-0.885832
		1899-12-31 19:08:18	2.46	-23.07	-0.1	10.33	0.05	-0.96	37.18	0.96	12.92	23.9	29.56	-3.44	-0.44	-0.914341
		1899-12-31 19:08:18	2.45	-22.05	-0.1	10.23	0.05	-1.01	36.83	1.01	13.95	22.87	28.75	-3.34	-0.34	-0.970256
		1899-12-31 19:08:18	2.44	-21.03	-0.09	10.13	0.06	-1.06	36.46	1.06	14.96	21.86	27.93	-3.24	-0.24	-1.03583
		1899-12-31 19:08:18	2.43	-20.02	-0.08	10.02	0.06	-1.11	36.07	1.11	15.97	20.85	27.09	-3.14	-0.14	-1.0805
		1899-12-31 19:08:18	2.42	-19.02	-0.08	9.91	0.07	-1.15	35.66	1.15	16.97	19.85	26.24	-3.04	-0.04	-1.13462					35.66	19.85
		1899-12-31 19:08:19	2.41	-18.04	-0.07	9.79	0.07	-1.19	35.24	1.2	17.95	18.87	25.37	-2.94	0.06	-1.17229
		1899-12-31 19:08:19	2.41	-17.07	-0.06	9.67	0.08	-1.23	34.81	1.24	18.93	17.89	24.49	-2.84	0.16	-1.18581
		1899-12-31 19:08:19	2.4	-16.11	-0.06	9.54	0.08	-1.27	34.36	1.27	19.89	16.93	23.6	-2.74	0.26	-1.2509
		1899-12-31 19:08:19	2.4	-15.16	-0.05	9.42	0.08	-1.3	33.9	1.3	20.83	15.99	22.69	-2.64	0.36	-1.28873
		1899-12-31 19:08:19	2.39	-14.22	-0.04	9.29	0.08	-1.33	33.43	1.33	21.77	15.05	21.77	-2.54	0.46	-1.2988
		1899-12-31 19:08:19	2.39	-13.3	-0.03	9.15	0.09	-1.36	32.95	1.36	22.69	14.13	20.83	-2.44	0.56	-1.33615
		1899-12-31 19:08:19	2.39	-12.39	-0.02	9.02	0.09	-1.38	32.46	1.38	23.6	13.22	19.89	-2.34	0.66	-1.35883
		1899-12-31 19:08:19	2.38	-11.5	-0.01	8.88	0.09	-1.4	31.96	1.4	24.49	12.33	18.93	-2.24	0.76	-1.39626
		1899-12-31 19:08:19	2.38	-10.62	0	8.74	0.09	-1.42	31.45	1.42	25.37	11.45	17.95	-2.14	0.86	-1.41778
		1899-12-31 19:08:19	2.38	-9.75	0	8.59	0.09	-1.43	30.94	1.44	26.24	10.58	16.97	-2.04	0.96	-1.41101
		1899-12-31 19:08:20	2.38	-8.9	0.01	8.45	0.09	-1.45	30.42	1.45	27.09	9.73	15.97	-1.94	1.06	-1.44822
		1899-12-31 19:08:20	2.39	-8.06	0.02	8.31	0.09	-1.46	29.9	1.46	27.93	8.89	14.96	-1.84	1.16	-1.44062
		1899-12-31 19:08:20	2.39	-7.24	0.03	8.16	0.09	-1.47	29.37	1.47	28.75	8.07	13.95	-1.74	1.26	-1.47796
		1899-12-31 19:08:20	2.39	-6.43	0.04	8.01	0.09	-1.48	28.84	1.48	29.56	7.26	12.92	-1.64	1.36	-1.46945
		1899-12-31 19:08:20	2.4	-5.64	0.05	7.86	0.09	-1.49	28.31	1.5	30.36	6.46	11.88	-1.54	1.46	-1.46072
		1899-12-31 19:08:20	2.4	-4.86	0.06	7.71	0.09	-1.5	27.77	1.51	31.14	5.68	10.83	-1.44	1.56	-1.49786
		1899-12-31 19:08:20	2.41	-4.09	0.07	7.56	0.09	-1.51	27.23	1.52	31.9	4.92	9.78	-1.34	1.66	-1.50768
		1899-12-31 19:08:20	2.42	-3.34	0.08	7.41	0.09	-1.52	26.68	1.52	32.65	4.17	8.72	-1.24	1.76	-1.52523
		1899-12-31 19:08:20	2.42	-2.61	0.09	7.26	0.09	-1.53	26.13	1.53	33.38	3.44	7.65	-1.14	1.86	-1.53504
		1899-12-31 19:08:20	2.43	-1.89	0.09	7.11	0.09	-1.54	25.58	1.54	34.1	2.72	6.57	-1.04	1.96	-1.52395
		1899-12-31 19:08:21	2.44	-1.19	0.1	6.95	0.09	-1.54	25.03	1.54	34.8	2.02	5.49	-0.94	2.06	-1.53414
		1899-12-31 19:08:21	2.45	-0.5	0.11	6.8	0.09	-1.54	24.47	1.54	35.49	1.33	4.4	-0.84	2.16	-1.54992
		1899-12-31 19:08:21	2.47	0.17	0.12	6.64	0.09	-1.54	23.92	1.55	36.16	0.66	3.3	-0.74	2.26	-1.53253
		1899-12-31 19:08:21	2.48	0.83	0.13	6.49	0.09	-1.55	23.36	1.55	36.82	0	2.21	-0.64	2.36	-1.5477
		1899-12-31 19:08:21	2.49	1.47	0.14	6.33	0.09	-1.55	22.81	1.55	37.46	-0.64	1.1	-0.54	2.46	-1.53076
		1899-12-31 19:08:21	2.51	2.09	0.15	6.18	0.09	-1.55	22.25	1.55	38.09	-1.27	0	-0.44	2.56	-1.54527							22.25	-1.27
27	1899-12-31 19:08:22	GlobalTime	X[m]	Y[m]	Vx[m/s]	Vy[m/s]	Ax[m/s2]	Ay[m/s2]	Speed[km/h]	Acceleration[m/s2]	Space[m]				3
		1899-12-31 19:08:24	3.23	-35.94	-0.78	11.89	0.04	-0.03	42.91	0.05	0	36.35	42.03	2.16	5.16
		1899-12-31 19:08:24	3.15	-34.75	-0.78	11.89	0.06	-0.04	42.9	0.07	1.19	35.16	40.9	2.26	5.26	-0.0278199
		1899-12-31 19:08:24	3.07	-33.56	-0.77	11.89	0.07	-0.04	42.89	0.08	2.38	33.97	39.76	2.36	5.36	-0.0278134
		1899-12-31 19:08:24	3	-32.37	-0.76	11.88	0.08	-0.05	42.87	0.1	3.57	32.78	38.63	2.46	5.46	-0.0556074
		1899-12-31 19:08:24	2.92	-31.19	-0.75	11.88	0.09	-0.06	42.85	0.11	4.76	31.59	37.49	2.56	5.56	-0.0555815
		1899-12-31 19:08:24	2.85	-30	-0.74	11.87	0.11	-0.07	42.82	0.13	5.95	30.4	36.35	2.66	5.66	-0.0833236
		1899-12-31 19:08:24	2.77	-28.81	-0.73	11.86	0.12	-0.08	42.79	0.14	7.14	29.21	35.2	2.76	5.76	-0.0832653
		1899-12-31 19:08:24	2.7	-27.63	-0.72	11.86	0.13	-0.09	42.76	0.16	8.33	28.02	34.06	2.86	5.86	-0.0832069
		1899-12-31 19:08:24	2.63	-26.44	-0.71	11.85	0.14	-0.1	42.72	0.17	9.52	26.83	32.91	2.96	5.96	-0.110852
		1899-12-31 19:08:25	2.56	-25.26	-0.69	11.84	0.15	-0.11	42.68	0.19	10.71	25.64	31.76	3.06	6.06	-0.110748
		1899-12-31 19:08:25	2.49	-24.07	-0.68	11.82	0.16	-0.12	42.64	0.2	11.89	24.46	30.61	3.16	6.16	-0.111582
		1899-12-31 19:08:25	2.42	-22.89	-0.66	11.81	0.17	-0.13	42.59	0.22	13.07	23.28	29.45	3.26	6.26	-0.13933
		1899-12-31 19:08:25	2.36	-21.71	-0.64	11.8	0.18	-0.15	42.53	0.23	14.26	22.09	28.3	3.36	6.36	-0.165577
		1899-12-31 19:08:25	2.3	-20.53	-0.63	11.78	0.18	-0.16	42.48	0.24	15.44	20.91	27.14	3.46	6.46	-0.138971
		1899-12-31 19:08:25	2.23	-19.36	-0.61	11.77	0.19	-0.17	42.42	0.25	16.62	19.73	25.98	3.56	6.56	-0.166549
		1899-12-31 19:08:25	2.17	-18.18	-0.59	11.75	0.19	-0.18	42.35	0.26	17.79	18.56	24.82	3.66	6.66	-0.195668
		1899-12-31 19:08:25	2.12	-17.01	-0.57	11.73	0.2	-0.19	42.28	0.27	18.97	17.38	23.65	3.76	6.76	-0.193689
		1899-12-31 19:08:25	2.06	-15.83	-0.55	11.71	0.2	-0.19	42.21	0.28	20.14	16.21	22.48	3.86	6.86	-0.195021
		1899-12-31 19:08:25	2.01	-14.66	-0.53	11.69	0.2	-0.2	42.14	0.28	21.31	15.04	21.31	3.96	6.96	-0.194698
		1899-12-31 19:08:26	1.95	-13.49	-0.51	11.67	0.21	-0.2	42.06	0.29	22.48	13.87	20.14	4.06	7.06	-0.222117
		1899-12-31 19:08:26	1.9	-12.33	-0.49	11.65	0.21	-0.21	41.99	0.29	23.65	12.7	18.97	4.16	7.16	-0.194006
		1899-12-31 19:08:26	1.86	-11.16	-0.47	11.63	0.21	-0.21	41.91	0.3	24.82	11.53	17.79	4.26	7.26	-0.221325
		1899-12-31 19:08:26	1.81	-10	-0.45	11.61	0.21	-0.21	41.83	0.3	25.98	10.37	16.62	4.36	7.36	-0.222808
		1899-12-31 19:08:26	1.77	-8.84	-0.42	11.59	0.22	-0.21	41.75	0.3	27.14	9.21	15.44	4.46	7.46	-0.222382
		1899-12-31 19:08:26	1.73	-7.68	-0.4	11.57	0.22	-0.22	41.67	0.31	28.3	8.05	14.26	4.56	7.56	-0.221956
		1899-12-31 19:08:26	1.69	-6.53	-0.38	11.55	0.22	-0.22	41.59	0.31	29.45	6.9	13.07	4.66	7.66	-0.223457
		1899-12-31 19:08:26	1.65	-5.38	-0.36	11.52	0.22	-0.22	41.51	0.31	30.61	5.74	11.89	4.76	7.76	-0.221105
		1899-12-31 19:08:26	1.61	-4.22	-0.34	11.5	0.22	-0.22	41.43	0.31	31.76	4.59	10.71	4.86	7.86	-0.222598
		1899-12-31 19:08:26	1.58	-3.07	-0.31	11.48	0.23	-0.22	41.35	0.31	32.91	3.44	9.52	4.96	7.96	-0.222169
		1899-12-31 19:08:27	1.55	-1.93	-0.29	11.46	0.23	-0.22	41.27	0.31	34.06	2.29	8.33	5.06	8.06	-0.221739
		1899-12-31 19:08:27	1.52	-0.78	-0.27	11.44	0.23	-0.22	41.19	0.32	35.2	1.15	7.14	5.16	8.16	-0.223251
		1899-12-31 19:08:27	1.5	0.36	-0.25	11.42	0.23	-0.22	41.11	0.32	36.35	0	5.95	5.26	8.26	-0.22088
		1899-12-31 19:08:27	1.47	1.5	-0.22	11.39	0.23	-0.22	41.03	0.32	37.49	-1.14	4.76	5.36	8.36	-0.222385
		1899-12-31 19:08:27	1.45	2.64	-0.2	11.37	0.23	-0.22	40.95	0.32	38.63	-2.28	3.57	5.46	8.46	-0.221951
		1899-12-31 19:08:27	1.43	3.78	-0.18	11.35	0.23	-0.22	40.87	0.32	39.76	-3.41	2.38	5.56	8.56	-0.223479
		1899-12-31 19:08:27	1.42	4.91	-0.15	11.33	0.23	-0.22	40.79	0.32	40.9	-4.55	1.19	5.66	8.66	-0.221085
		1899-12-31 19:08:27	1.4	6.04	-0.13	11.31	0.23	-0.22	40.71	0.32	42.03	-5.68	0	5.76	8.76	-0.222605
28	1899-12-31 19:21:25	GlobalTime	X[m]	Y[m]	Vx[m/s]	Vy[m/s]	Ax[m/s2]	Ay[m/s2]	Speed[km/h]	Acceleration[m/s2]	Space[m]				3
[truncated: 5,089 more rows]
