# Supplementary material for: Determining E-Bike Drivers’ Decision-Making Mechanisms during Signal Change Interval Using the Hidden Markov Driving Model
Source: Hindawi journal article supplement (doi:10.1155/2019/7341097), 2019-04-07
Supplement: f1 [file 7341097.f1.zip › 7341097.f1/Supplementary Material 3_five decision types.xls]

## Sheet: decision types
type1													type2
Time(s)（flashing green onset is 0）	Speed [km/h]	Acceleration [m/s2]										Time(s)（flashing green onset is 0）	Speed[km/h]	Acceleration[m/s2]
0	20.89	0.02										-0.02	29.78	-0.06
0.1	20.89	0.03										0.08	29.8	-0.08
0.2	20.89	0.04										0.18	29.83	-0.09
0.3	20.89	0.04										0.28	29.86	-0.11
0.4	20.89	0.05										0.38	29.89	-0.12
0.5	20.89	0.05										0.48	29.93	-0.14
0.6	20.9	0.06										0.58	29.97	-0.15
0.7	20.9	0.07										0.68	30.01	-0.15
0.8	20.91	0.07										0.78	30.06	-0.16
0.9	20.91	0.08										0.88	30.1	-0.16
1	20.92	0.08										0.98	30.15	-0.15
1.1	20.93	0.09										1.08	30.19	-0.15
1.2	20.95	0.09										1.18	30.23	-0.14
1.3	20.96	0.1										1.28	30.26	-0.13
1.4	20.98	0.1										1.38	30.29	-0.11
1.5	21	0.11										1.48	30.31	-0.09
1.6	21.03	0.11										1.58	30.31	-0.08
1.7	21.06	0.12										1.68	30.31	-0.09
1.8	21.09	0.12										1.78	30.29	-0.11
1.9	21.12	0.13										1.88	30.26	-0.14
2	21.16	0.13										1.98	30.21	-0.19
2.1	21.2	0.14										2.08	30.14	-0.24
2.2	21.25	0.15										2.18	30.04	-0.3
2.3	21.29	0.16										2.28	29.93	-0.37
2.4	21.35	0.16										2.38	29.79	-0.44
2.5	21.4	0.17										2.48	29.62	-0.52
2.6	21.46	0.18										2.58	29.42	-0.6
2.7	21.53	0.19										2.68	29.19	-0.69
2.8	21.6	0.2										2.78	28.94	-0.78
2.9	21.67	0.21										2.88	28.65	-0.87
3	21.75	0.22										2.98	28.32	-0.96
3.1	21.83	0.23										3.08	27.97	-1.05
3.2	21.92	0.25										3.18	27.58	-1.14
3.3	22.01	0.26										3.28	27.16	-1.23
3.4	22.1	0.27										3.38	26.7	-1.32
3.5	22.2	0.28										3.48	26.22	-1.4
3.6	22.3	0.29										3.58	25.71	-1.48
3.7	22.4	0.3										3.68	25.16	-1.56
3.8	22.5	0.3										3.78	24.59	-1.63
3.9	22.61	0.31										3.88	24	-1.69
4	22.71	0.32										3.98	23.39	-1.75
4.1	22.82	0.33										4.08	22.75	-1.8
4.2	22.93	0.34										4.18	22.1	-1.84
4.3	23.04	0.34										4.28	21.43	-1.88
4.4	23.15	0.35										4.38	20.76	-1.91
4.5	23.26	0.36										4.48	20.07	-1.93
4.6	23.38	0.37										4.58	19.37	-1.94
4.7	23.5	0.37										4.68	18.67	-1.96
4.8	23.61	0.38										4.78	17.97	-1.96
4.9	23.74	0.38										4.88	17.26	-1.97
5	23.86	0.39										4.98	16.56	-1.97
5.1	23.98	0.39										5.08	15.85	-1.96
5.2	24.11	0.39										5.18	15.15	-1.96
5.3	24.24	0.39										5.28	14.44	-1.95
5.4	24.37	0.39										5.38	13.74	-1.95
5.5	24.5	0.39										5.48	13.04	-1.94
5.61	24.63	0.38										5.58	12.35	-1.93
5.71	24.76	0.37										5.68	11.65	-1.93
5.81	24.88	0.37										5.78	10.96	-1.92
5.91	25	0.36										5.88	10.27	-1.92
6.01	25.12	0.35										5.98	9.58	-1.92
type3
												type4
Time(s)（flashing green onset is 0）	Speed[km/h]	Acceleration[m/s2]										Time(s)（flashing green onset is 0）	Speed[km/h]	Acceleration[m/s2]
0	25.28	0.49										0	26.47	-0.1
0.1	25.34	0.5										0.1	26.43	-0.12
0.2	25.4	0.51										0.2	26.39	-0.15
0.3	25.46	0.5										0.3	26.33	-0.17
0.4	25.51	0.5										0.4	26.27	-0.2
0.5	25.55	0.49										0.5	26.19	-0.23
0.6	25.59	0.48										0.6	26.11	-0.26
0.7	25.62	0.46										0.7	26.01	-0.29
0.8	25.65	0.44										0.8	25.9	-0.33
0.9	25.66	0.39										0.9	25.78	-0.36
1	25.67	0.32										1	25.64	-0.39
1.1	25.68	0.25										1.1	25.5	-0.43
1.2	25.67	0.18										1.2	25.34	-0.46
1.3	25.66	0.1										1.3	25.17	-0.49
1.4	25.64	0.02										1.4	24.99	-0.53
1.5	25.62	-0.04										1.5	24.79	-0.56
1.6	25.58	-0.09										1.6	24.59	-0.59
1.7	25.54	-0.14										1.7	24.37	-0.62
1.8	25.48	-0.18										1.8	24.15	-0.65
1.9	25.42	-0.24										1.9	23.91	-0.67
2	25.34	-0.3										2	23.66	-0.7
2.1	25.25	-0.37										2.1	23.41	-0.72
2.2	25.14	-0.44										2.2	23.15	-0.74
2.3	25.02	-0.51										2.3	22.88	-0.76
2.4	24.89	-0.57										2.4	22.6	-0.77
2.5	24.74	-0.62										2.5	22.33	-0.78
2.6	24.57	-0.68										2.6	22.05	-0.78
2.7	24.39	-0.72										2.7	21.77	-0.78
2.8	24.2	-0.76										2.8	21.49	-0.77
2.9	23.99	-0.8										2.9	21.21	-0.75
3	23.77	-0.83										3	20.95	-0.73
3.1	23.53	-0.87										3.1	20.69	-0.7
3.2	23.28	-0.9										3.2	20.44	-0.66
3.3	23.01	-0.93										3.3	20.21	-0.62
3.4	22.72	-0.96										3.4	19.99	-0.58
3.5	22.42	-0.99										3.5	19.79	-0.53
3.6	22.1	-1.02										3.6	19.6	-0.47
3.7	21.75	-1.06										3.7	19.44	-0.41
3.8	21.39	-1.1										3.8	19.3	-0.35
3.9	21.01	-1.13										3.9	19.18	-0.28
4	20.62	-1.17										4	19.09	-0.22
4.1	20.2	-1.21										4.1	19.02	-0.15
4.2	19.77	-1.25										4.2	18.97	-0.08
4.3	19.32	-1.28										4.3	18.95	-0.01
4.4	18.86	-1.32										4.4	18.95	0.06
4.5	18.38	-1.35										4.5	18.98	0.13
4.6	17.89	-1.38										4.6	19.03	0.2
4.7	17.39	-1.41										4.7	19.11	0.27
4.8	16.88	-1.43										4.8	19.22	0.34
4.9	16.36	-1.45										4.9	19.34	0.4
5	15.84	-1.46										5	19.5	0.46
5.1	15.31	-1.47										5.1	19.67	0.52
5.2	14.79	-1.47										5.2	19.86	0.56
5.3	14.26	-1.48										5.3	20.07	0.6
5.4	13.73	-1.48										5.4	20.29	0.63
5.5	13.21	-1.47										5.5	20.52	0.66
5.6	12.68	-1.47										5.6	20.76	0.68
5.7	12.16	-1.47										5.7	21	0.69
5.8	11.64	-1.47										5.8	21.25	0.7
5.9	11.12	-1.47										5.9	21.51	0.71
6	10.6	-1.48										6	21.76	0.71
type5
Time(s)（flashing green onset is 0）	Speed[km/h]	Acceleration[m/s2]
0	19.18	-0.19
0.1	19.11	-0.18
0.2	19.05	-0.17
0.3	18.99	-0.15
0.4	18.94	-0.14
0.5	18.89	-0.12
0.6	18.85	-0.1
0.7	18.82	-0.07
0.8	18.79	-0.05
0.9	18.78	-0.03
1	18.77	-0.01
1.1	18.77	0.02
1.2	18.78	0.04
1.3	18.8	0.07
1.4	18.82	0.09
1.5	18.86	0.11
1.6	18.9	0.14
1.7	18.95	0.16
1.8	19.01	0.18
1.9	19.08	0.2
2	19.16	0.22
2.1	19.24	0.24
2.2	19.33	0.26
2.3	19.42	0.27
2.4	19.52	0.29
2.5	19.63	0.3
2.6	19.74	0.31
2.7	19.85	0.32
2.8	19.96	0.32
2.9	20.08	0.32
3	20.2	0.32
3.1	20.31	0.31
3.2	20.42	0.3
3.3	20.53	0.28
3.4	20.62	0.26
3.5	20.71	0.23
3.6	20.8	0.21
3.7	20.87	0.17
3.8	20.92	0.14
3.9	20.97	0.1
4	21	0.07
4.1	21.02	0.03
4.2	21.03	-0.01
4.3	21.02	-0.05
4.4	20.99	-0.09
4.5	20.96	-0.13
4.6	20.9	-0.17
4.7	20.84	-0.2
4.8	20.76	-0.23
4.9	20.68	-0.26
5	20.58	-0.29
5.1	20.47	-0.31
5.2	20.36	-0.33
5.3	20.24	-0.35
5.4	20.11	-0.37
5.5	19.97	-0.38
5.6	19.83	-0.39
5.7	19.69	-0.4
5.8	19.54	-0.41
5.9	19.4	-0.41
6	19.25	-0.41
